# Supplementary material for: Organocatalyzed double dearomatization reaction of non-functionalized phenols and propargylic alcohols: the important regulating effect of steric hindrance
Source: Royal Society of Chemistry journal article supplement (doi:10.1039/d4qo00103f), 2024-01-01
Supplement: d4qo00103f1.pdf [file d4qo00103f1.pdf]

## *Supporting Information*

# **Organocatalyzed Double Dearomatization Reaction of Non- Functionalized Phenols and Propargylic Alcohols: The Important Regulating Effect of Steric Hindrance**

Xihong Liu,<sup>\*a</sup> Boyan Zhu,<sup>a</sup> Panpan Zhou,<sup>b</sup> Jingying Zhang,<sup>a</sup> Anqi Chu<sup>a</sup> and Rui Wang<sup>\*a</sup>

<sup>a</sup> Key Laboratory of Preclinical Study for New Drugs of Gansu Province, School of Basic Medical Sciences & Research Unit of Peptide Science, Chinese Academy of Medical Sciences, 2019RU066, Lanzhou University, Lanzhou 730000, China.

<sup>b</sup> State Key Laboratory of Applied Organic Chemistry, Key Laboratory of Nonferrous Metal Chemistry and Resources Utilization of Gansu Province, College of Chemistry and Chemical Engineering, Lanzhou University, Lanzhou 730000, China.

Corresponding authors: [liuxihong@lzu.edu.cn](mailto:liuxihong@lzu.edu.cn); [wangrui@lzu.edu.cn](mailto:wangrui@lzu.edu.cn)

### **Table of Contents**

|                                                                                                                          |      |
|--------------------------------------------------------------------------------------------------------------------------|------|
| 1. General Information.....                                                                                              | S1   |
| 2. Reagents and Substrates.....                                                                                          | S1   |
| 3. General Procedure for [3+3] Cycloaddition Reactions Between Polycyclic Phenols and Propargylic Alcohols.....          | S2   |
| 4. General Procedure for Double Dearomatization Reactions of Polycyclic Phenols and Propargylic Alcohols.....            | S3   |
| 5. Screening of Chiral Brønsted Acids.....                                                                               | S4   |
| 6. Characterization Data.....                                                                                            | S5   |
| 7. General Procedures for the Transformations of Double Dearomatization Product <b>3e</b> .....                          | S26  |
| 8. Control Experiments.....                                                                                              | S30  |
| 9. The Computed Reaction Free Energy Profiles for the Dearomatization and [3+3] Cycloaddition Pathways.....              | S31  |
| 10. Computational Investigation on the Intramolecular Noncovalent Interactions of Dearomatized Allene Intermediates..... | S98  |
| 11. X-Ray Structure of <b>3e</b> .....                                                                                   | S103 |
| 12. Supplementary References.....                                                                                        | S104 |
| 13. Copies of NMR Results.....                                                                                           | S106 |

## 1. General Information

Unless stated otherwise, all reactions were carried out in flame dried glassware. All solvents were dried according to established procedures. Chemicals were purchased from commercial suppliers and used without further purification. Reactions were monitored by thin layer chromatography (TLC), column chromatography purifications were carried out using silica gel. NMR spectra were recorded on a Bruker 300MHz instrument and internally referenced to tetramethylsilane signal or residual protic solvent signals. Data for  $^1\text{H}$  NMR are recorded as follows: chemical shift, integration, multiplicity (br = broad, s = singlet, d = doublet, t = triplet, q = quartet, m = multiplet, cm = complex multiplet) and coupling constant in Hertz (Hz). Data for  $^{13}\text{C}$  NMR are reported in terms of chemical shift ( $\delta$ , ppm). Melting points were measured on a SCW X-4 and values are uncorrected. High resolution mass spectra (HRMS) were obtained by the ESI ionization sources.

## 2. Reagents and Substrates

Polycyclic phenols **1c-1p**<sup>[1]</sup> and propargylic alcohols **2a-2aa**<sup>[2]</sup> were prepared according to literature methods.

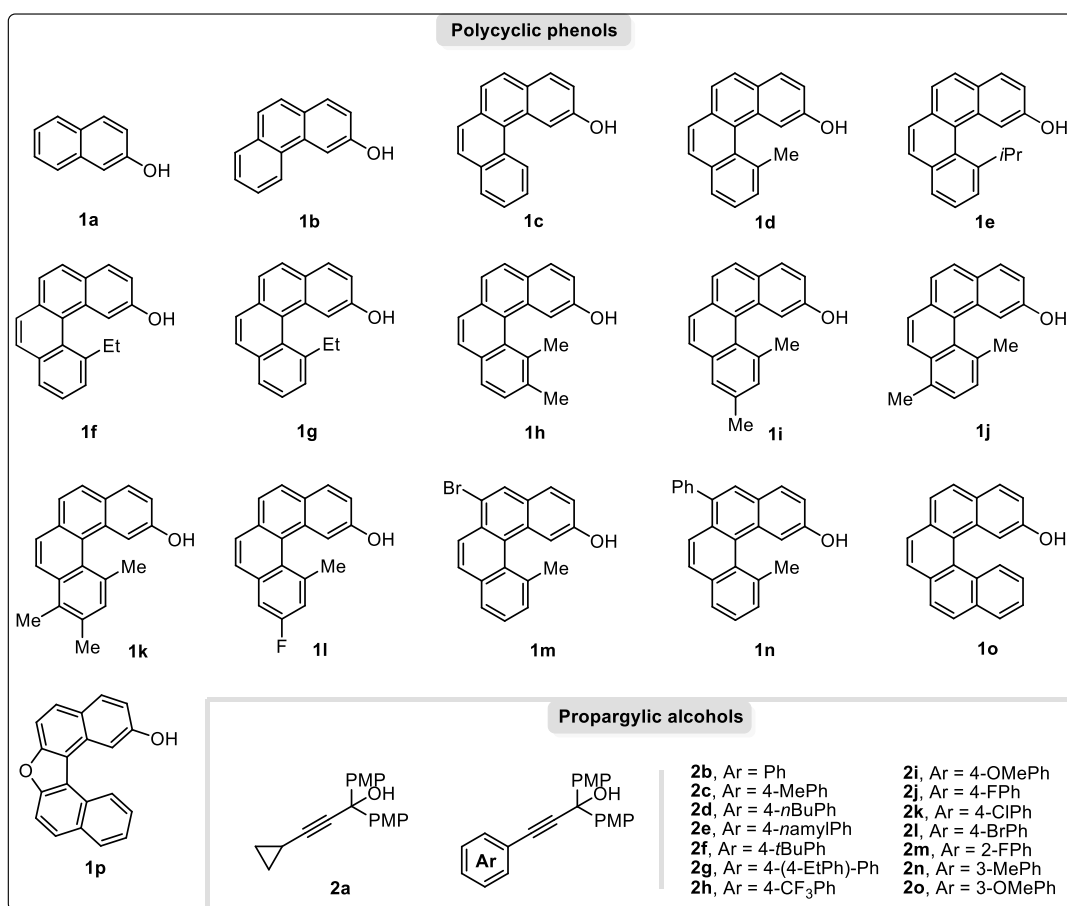

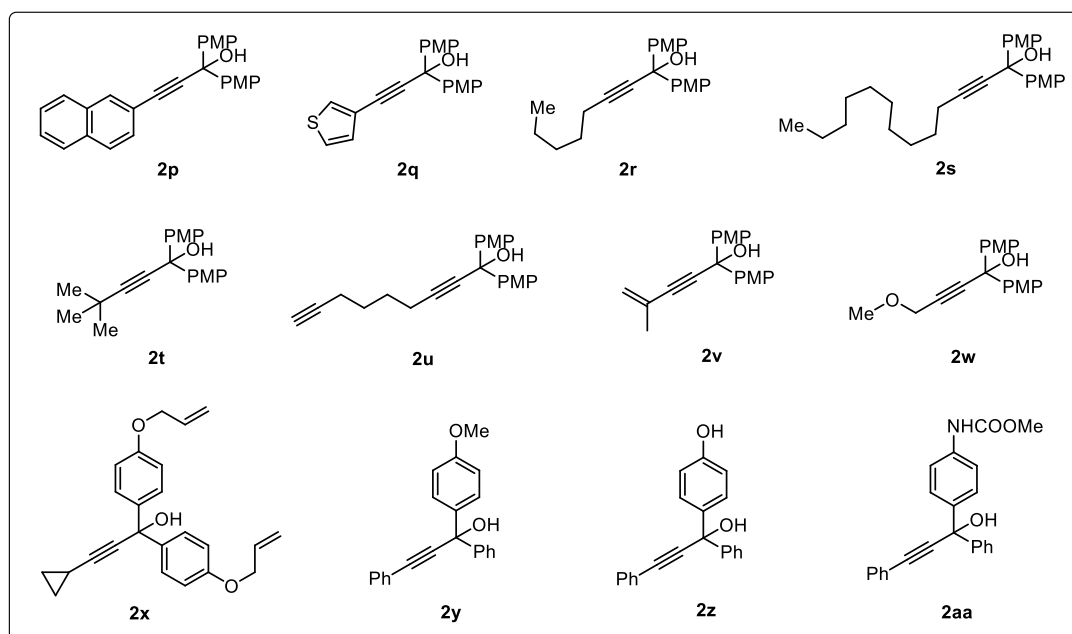

**Figure S1.** Substrates **1** and **2** employed in this study.

### 3. General Procedure for [3+3] Cycloaddition Reactions Between Polycyclic Phenols and Propargylic Alcohols

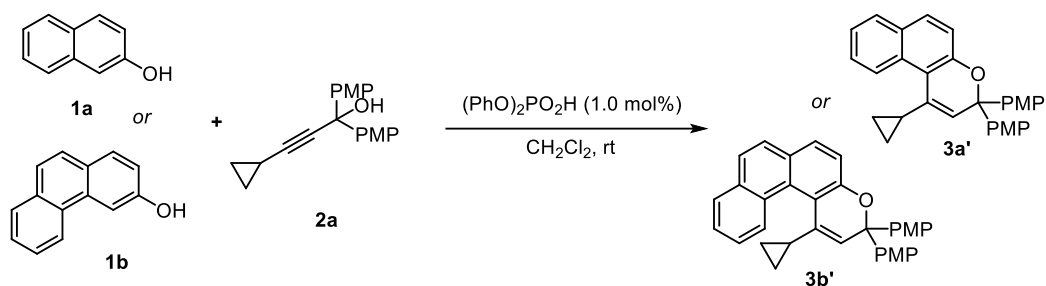

To a mixture of  $\beta$ -naphthol **1a** or phenanthren-3-ol **1b** (0.1 mmol, 1.0 equiv) and propargylic alcohol **2a** (0.12 mmol, 1.2 equiv) in DCM (1.0 mL) was added diphenyl phosphate (0.001 mmol). The resulting solution was stirred at room temperature until the complete consumption of starting material, and the reaction mixture was directly purified by silica gel column chromatography to afford the desired products **3a'** and **3b'**.

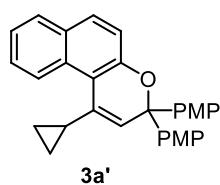

Prepared according to the general procedure on a 0.1 mmol scale and purified by flash

chromatography (petroleum ether/ethyl acetate = 100/1). White solid, m.p. 103-104 °C, 41.2 mg, 95% yield;  $^1\text{H NMR}$  (300 MHz, Chloroform-*d*)  $\delta$  8.73 (d,  $J = 8.6$  Hz, 1H), 7.64 (dd,  $J = 19.9, 8.4$  Hz, 2H), 7.50 – 7.12 (m, 7H), 6.76 (d,  $J = 8.3$  Hz, 4H), 5.76 (s, 1H), 3.70 (s, 6H), 2.03 (dd,  $J = 9.6, 4.6$  Hz, 1H), 1.04 (d,  $J = 7.8$  Hz, 2H), 0.89 (d,  $J = 5.5$  Hz, 2H) ppm;  $^{13}\text{C NMR}$  (75 MHz,  $\text{CDCl}_3$ )  $\delta$  158.72, 151.53, 137.21, 130.61, 130.33, 130.26, 128.74, 128.41, 125.79, 125.64, 123.17, 123.06, 118.82, 118.54, 113.23, 81.62, 55.20, 16.45, 10.08 ppm; **HRMS (ESI)**:  $\text{C}_{30}\text{H}_{27}\text{O}_3$   $[\text{M} + \text{H}]^+$  calcd: 435.1954, found: 435.1933.

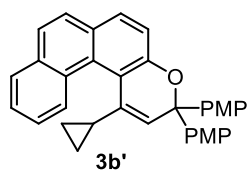

Prepared according to the general procedure on a 0.1 mmol scale and purified by flash chromatography (petroleum ether/ethyl acetate = 100/1). White solid, m.p. 175-176 °C, 44.5 mg, 92% yield;  $^1\text{H NMR}$  (300 MHz, Chloroform-*d*)  $\delta$  8.41 (d,  $J = 7.6$  Hz, 1H), 7.96 – 7.72 (m, 1H), 7.63 (d,  $J = 8.4$  Hz, 1H), 7.61 – 7.42 (m, 6H), 7.41 – 7.23 (m, 3H), 6.87 (d,  $J = 8.3$  Hz, 2H), 6.66 (d,  $J = 8.3$  Hz, 2H), 5.55 (d,  $J = 2.6$  Hz, 1H), 3.77 (s, 3H), 3.56 (s, 3H), 1.64 – 1.38 (m, 1H), 1.05 – 0.84 (m, 2H), 0.48 (ddt,  $J = 29.4, 9.9, 5.0$  Hz, 2H) ppm;  $^{13}\text{C NMR}$  (75 MHz,  $\text{CDCl}_3$ )  $\delta$  158.83, 158.74, 152.87, 141.78, 138.93, 135.18, 132.90, 130.32, 130.00, 129.74, 129.26, 128.21, 128.11, 127.95, 127.40, 126.96, 126.26, 124.68, 124.28, 121.31, 118.58, 117.35, 113.51, 113.01, 82.86, 55.35, 55.01, 14.82, 13.18, 11.43 ppm; **HRMS (ESI)**:  $\text{C}_{34}\text{H}_{29}\text{O}_3$   $[\text{M} + \text{H}]^+$  calcd: 485.2110, found: 485.2098.

#### 4. General Procedure for Double Dearomatization Reactions of Polycyclic Phenols and Propargylic Alcohols

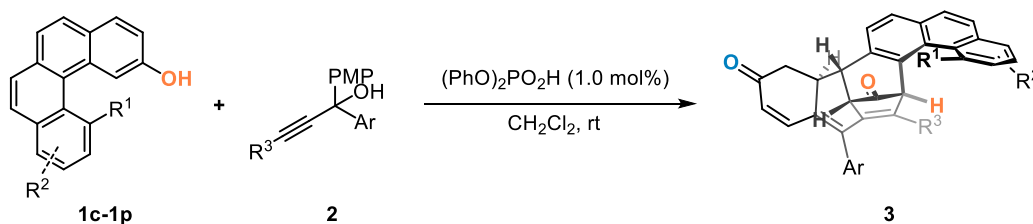

To a mixture of polycyclic phenols **1** (0.1 mmol, 1.0 equiv) and propargylic alcohols **2** (0.12 mmol, 1.2 equiv) in DCM (1.0 mL) was added diphenyl phosphate (0.001 mmol). The resulting solution

was stirred at room temperature for the specified time, the process of which was monitored by TLC. Then the solvent was removed under reduced pressure, and the residue was purified by silica gel column chromatography to afford the desired products **3**.

## 5. Screening of Chiral Brønsted Acids

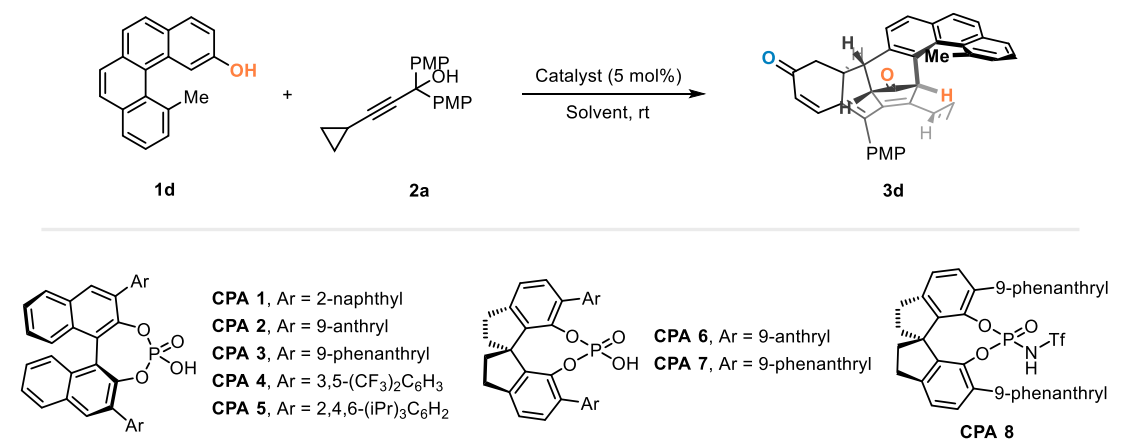

| Entry | Catalyst     | Solvent                         | <i>t</i> (h) | Yield (%) <sup>a</sup> | ee (%) <sup>b</sup> |
|-------|--------------|---------------------------------|--------------|------------------------|---------------------|
| 1     | <b>CPA 1</b> | CH <sub>2</sub> Cl <sub>2</sub> | 60           | 46                     | 0.5                 |
| 2     | <b>CPA 2</b> | CH <sub>2</sub> Cl <sub>2</sub> | 60           | 64                     | 2                   |
| 3     | <b>CPA 3</b> | CH <sub>2</sub> Cl <sub>2</sub> | 60           | 65                     | 0                   |
| 4     | <b>CPA 4</b> | CH <sub>2</sub> Cl <sub>2</sub> | 60           | 37                     | 0                   |
| 5     | <b>CPA 5</b> | CH <sub>2</sub> Cl <sub>2</sub> | 60           | 90                     | 11                  |
| 6     | <b>CPA 6</b> | CH <sub>2</sub> Cl <sub>2</sub> | 60           | 95                     | 26                  |
| 7     | <b>CPA 7</b> | CH <sub>2</sub> Cl <sub>2</sub> | 60           | 86                     | 21                  |
| 8     | <b>CPA 8</b> | CH <sub>2</sub> Cl <sub>2</sub> | 60           | 65                     | 13                  |
| 9     | <b>CPA 6</b> | toluene                         | 48           | 87                     | 49                  |

Reaction conditions: polycyclic phenol **1d** (0.05 mmol, 1.0 equiv.), propargylic alcohol **2a** (0.06 mmol, 1.2 equiv.) and catalyst (5 mol%) in 0.6 mL of solvent. <sup>a</sup> Isolated yield. <sup>b</sup> Enantiomeric excess was determined by chiral HPLC.

Chiral Brønsted acids were also recruited to catalyze the double dearomatization reaction of polycyclic phenol **1d** and propargylic alcohol **2a**. However, the employment of either chiral phosphoric acids (**CPA 1-CPA 7**) or the chiral phosphoric amide **CPA 8** failed to afford a satisfactory outcome with respect to enantioselectivity.

## 6. Characterization Data

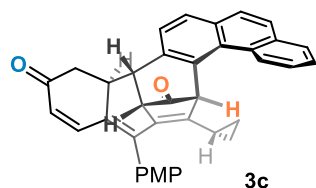

Prepared according to the general procedure on a 0.1 mmol scale and purified by flash chromatography (petroleum ether/ethyl acetate = 4/1 to 2/1). Yellow solid, m.p. 164-165 °C, 21.3 mg, 41% yield; **<sup>1</sup>H NMR** (300 MHz, Chloroform-*d*) δ 8.57 – 8.27 (m, 1H), 7.82 (dd, *J* = 7.2, 2.8 Hz, 1H), 7.69 (d, *J* = 8.0 Hz, 1H), 7.55 (dt, *J* = 16.9, 8.6 Hz, 5H), 7.36 (d, *J* = 8.1 Hz, 1H), 7.28 – 7.04 (m, 3H), 6.92 – 6.68 (m, 2H), 5.90 (d, *J* = 10.0 Hz, 1H), 5.16 (s, 1H), 3.74 (s, 3H), 3.66 (d, *J* = 5.6 Hz, 2H), 3.41 (d, *J* = 4.5 Hz, 1H), 3.04 – 2.71 (m, 2H), 0.55 (td, *J* = 8.0, 4.1 Hz, 1H), 0.00 (dtt, *J* = 20.8, 8.2, 4.4 Hz, 2H), -0.34 (dq, *J* = 14.5, 8.0, 6.8 Hz, 1H), -0.95 (dq, *J* = 10.9, 5.5 Hz, 1H) ppm; **<sup>13</sup>C NMR** (75 MHz, CDCl<sub>3</sub>) δ 210.00, 198.56, 159.82, 153.64, 144.84, 142.82, 138.52, 136.07, 134.36, 133.41, 131.43, 131.09, 129.75, 129.12, 128.74, 128.30, 128.11, 127.97, 127.73, 127.28, 126.93, 126.46, 125.90, 125.49, 114.17, 55.28, 54.57, 52.90, 49.48, 46.00, 44.82, 29.72, 9.93, 5.62 ppm; **HRMS (ESI)**: C<sub>37</sub>H<sub>29</sub>O<sub>3</sub> [M + H]<sup>+</sup> calcd: 521.2110, found: 521.2090.

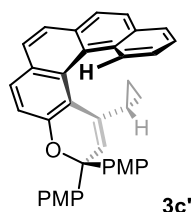

Prepared according to the general procedure on a 0.1 mmol scale and purified by flash chromatography (petroleum ether/ethyl acetate = 30/1 to 20/1). White solid, m.p. 206-207 °C, 16.9 mg, 32% yield; **<sup>1</sup>H NMR** (300 MHz, Chloroform-*d*) δ 7.96 – 7.81 (m, 3H), 7.81 – 7.70 (m, 4H), 7.70 – 7.56 (m, 2H), 7.55 – 7.43 (m, 2H), 7.43 – 7.25 (m, 3H), 6.96 (d, *J* = 7.6 Hz, 2H), 6.86 (d, *J* = 7.0 Hz, 2H), 5.55 (s, 1H), 3.78 (s, 3H), 3.73 (s, 3H), 0.26 (p, *J* = 6.9 Hz, 1H), -0.15 (t, *J* = 6.3 Hz, 3H), -0.30 (td, *J* = 8.8, 8.4, 4.6 Hz, 1H) ppm; **<sup>13</sup>C NMR** (75 MHz, CDCl<sub>3</sub>) δ 158.99, 158.94, 152.85, 141.05, 138.86, 135.68, 132.25, 131.56, 131.34, 130.22, 129.55, 128.83, 128.36, 128.31, 127.60, 127.29, 127.25, 127.22, 126.22, 125.86, 125.50, 125.35, 124.54, 122.27, 118.80, 117.09, 113.48, 113.12, 82.29, 55.33, 55.24, 13.86, 10.46, 9.18 ppm; **HRMS (ESI)**: C<sub>38</sub>H<sub>31</sub>O<sub>3</sub> [M + H]<sup>+</sup> calcd: 535.2267, found: 535.2247.

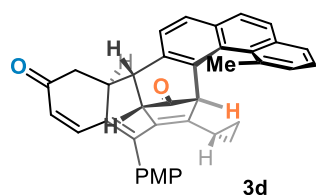

Prepared according to the general procedure on a 0.1 mmol scale and purified by flash chromatography (petroleum ether/ethyl acetate = 10/1 to 4/1). Yellow solid, m.p. 219-220 °C, 45.8 mg, 86% yield;  $^1\text{H NMR}$  (300 MHz, Chloroform-*d*)  $\delta$  7.82 (d,  $J = 7.7$  Hz, 1H), 7.72 (d,  $J = 7.5$  Hz, 1H), 7.68 – 7.41 (m, 6H), 7.24 (d,  $J = 1.7$  Hz, 2H), 6.90 (d,  $J = 7.0$  Hz, 2H), 6.01 (d,  $J = 1.5$  Hz, 1H), 4.41 (s, 1H), 3.84 (d,  $J = 1.6$  Hz, 4H), 3.73 (t,  $J = 9.9$  Hz, 1H), 3.50 (d,  $J = 4.5$  Hz, 1H), 2.99 (d,  $J = 9.9$  Hz, 3H), 2.77 (s, 3H), 0.47 (hept,  $J = 5.2$  Hz, 1H), 0.00 (tq,  $J = 9.1, 5.7$  Hz, 1H), -0.22 (dq,  $J = 10.7, 5.6$  Hz, 1H), -0.44 (tt,  $J = 7.9, 5.3$  Hz, 1H), -1.36 (dq,  $J = 10.6, 5.5$  Hz, 1H) ppm;  $^{13}\text{C NMR}$  (75 MHz,  $\text{CDCl}_3$ )  $\delta$  208.99, 198.64, 159.72, 153.63, 144.97, 142.92, 136.59, 136.30, 135.22, 134.01, 133.86, 131.64, 131.01, 129.23, 128.95, 128.85, 128.67, 128.23, 127.16, 127.08, 126.66, 125.84, 125.68, 124.95, 114.09, 55.26, 54.38, 53.02, 47.88, 45.92, 45.08, 23.18, 9.65, 5.20 ppm; **HRMS (ESI)**:  $\text{C}_{38}\text{H}_{31}\text{O}_3$   $[\text{M} + \text{H}]^+$  calcd: 535.2267, found: 535.2245.

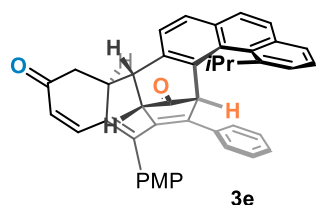

Prepared according to the general procedure on a 0.1 mmol scale and purified by flash chromatography (petroleum ether/ethyl acetate = 10/1 to 4/1). Yellow solid, m.p. 168 - 169 °C, 52.0 mg, 87% yield;  $^1\text{H NMR}$  (300 MHz,  $\text{CDCl}_3$ )  $\delta$  7.69 (d,  $J = 8.2$  Hz, 1H), 7.56 (dd,  $J = 8.7, 4.2$  Hz, 1H), 7.50 (t,  $J = 5.1$  Hz, 3H), 7.42 (d,  $J = 8.2$  Hz, 1H), 7.31 (d,  $J = 9.0$  Hz, 2H), 7.00 (d,  $J = 8.4$  Hz, 2H), 6.74 – 6.56 (m, 3H), 6.37 (t,  $J = 7.6$  Hz, 2H), 5.91 (t,  $J = 9.8$  Hz, 3H), 5.21 (s, 1H), 3.97 – 3.82 (m, 2H), 3.69 (s, 3H), 3.67 – 3.55 (m, 2H), 3.08 – 2.84 (m, 2H), 1.79 (d,  $J = 6.5$  Hz, 3H), 0.50 (d,  $J = 6.5$  Hz, 3H) ppm;  $^{13}\text{C NMR}$  (75 MHz,  $\text{CDCl}_3$ )  $\delta$  209.72, 198.41, 159.55, 147.75, 146.79, 144.53, 143.11, 136.17, 135.85, 134.07, 134.02, 133.48, 132.13, 131.82, 130.92, 128.85, 128.29, 127.58, 127.46, 127.29, 127.10, 126.97, 126.88, 126.80, 126.33, 125.44, 125.06, 123.25, 113.82, 56.78, 56.67, 55.24, 48.31, 45.83, 45.48, 32.48, 27.79, 21.85 ppm; **HRMS (ESI)**:

C<sub>43</sub>H<sub>35</sub>O<sub>3</sub> [M + H]<sup>+</sup> calcd: 599.2580, found: 599.2556.

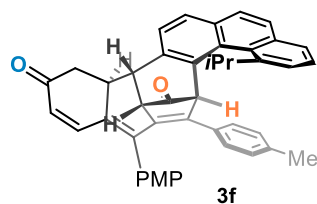

Prepared according to the general procedure on a 0.1 mmol scale and purified by flash chromatography (petroleum ether/ethyl acetate = 10/1 to 4/1). Yellow solid, m.p. 161 - 162 °C, 43.0 mg, 70% yield; <sup>1</sup>H NMR (300 MHz, CDCl<sub>3</sub>) δ 7.67 (d, *J* = 8.1 Hz, 1H), 7.63 – 7.45 (m, 4H), 7.41 (d, *J* = 8.1 Hz, 1H), 7.30 (dd, *J* = 16.2, 8.8 Hz, 2H), 7.03 (d, *J* = 8.1 Hz, 2H), 6.72 (d, *J* = 8.2 Hz, 2H), 6.17 (d, *J* = 7.7 Hz, 2H), 5.92 (d, *J* = 10.1 Hz, 1H), 5.80 (d, *J* = 7.7 Hz, 2H), 5.20 (s, 1H), 3.97 – 3.84 (m, 2H), 3.71 (s, 3H), 3.63 – 3.49 (m, 2H), 3.07 – 2.85 (m, 2H), 1.90 (s, 3H), 1.78 (d, *J* = 6.3 Hz, 3H), 0.50 (d, *J* = 6.3 Hz, 3H) ppm; <sup>13</sup>C NMR (75 MHz, CDCl<sub>3</sub>) δ 209.71, 198.46, 159.57, 147.64, 146.88, 144.52, 143.43, 137.23, 136.19, 136.05, 134.09, 133.53, 133.29, 131.87, 130.91, 129.30, 128.22, 127.61, 127.55, 127.44, 127.33, 127.15, 126.97, 126.94, 126.24, 125.57, 125.10, 123.29, 113.93, 56.93, 56.52, 55.27, 48.41, 45.92, 45.49, 32.51, 27.84, 21.89, 20.90 ppm; HRMS (ESI): C<sub>44</sub>H<sub>37</sub>O<sub>3</sub> [M + H]<sup>+</sup> calcd: 613.2736, found: 613.2715.

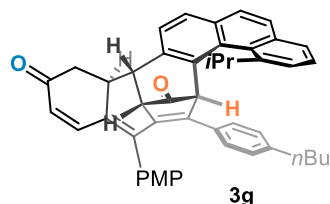

Prepared according to the general procedure on a 0.1 mmol scale and purified by flash chromatography (petroleum ether/ethyl acetate = 10/1 to 4/1). Yellow solid, m.p. 125 - 126 °C, 48.0 mg, 73% yield; <sup>1</sup>H NMR (300 MHz, CDCl<sub>3</sub>) δ 7.67 (d, *J* = 8.2 Hz, 1H), 7.62 – 7.54 (m, 1H), 7.54 – 7.46 (m, 3H), 7.41 (d, *J* = 8.2 Hz, 1H), 7.29 (d, *J* = 8.8 Hz, 2H), 7.02 (d, *J* = 8.4 Hz, 2H), 6.69 (d, *J* = 8.5 Hz, 2H), 6.17 (d, *J* = 7.9 Hz, 2H), 5.92 (d, *J* = 10.1 Hz, 1H), 5.81 (d, *J* = 7.8 Hz, 2H), 5.20 (s, 1H), 3.96 – 3.81 (m, 2H), 3.69 (s, 3H), 3.64 – 3.50 (m, 2H), 3.03 – 2.87 (m, 2H), 2.17 (t, *J* = 7.4 Hz, 2H), 1.79 (d, *J* = 6.5 Hz, 3H), 1.24 (dt, *J* = 15.2, 7.6 Hz, 2H), 1.05 (dq, *J* = 14.2, 7.1 Hz, 2H), 0.82 (t, *J* = 7.2 Hz, 3H), 0.50 (d, *J* = 6.4 Hz, 3H) ppm; <sup>13</sup>C NMR (75 MHz, CDCl<sub>3</sub>) δ 209.91, 198.48, 159.54, 147.88, 146.81, 144.62, 143.42, 142.08, 136.33, 135.91, 134.04, 133.37, 133.17, 131.79, 130.96, 129.43, 129.03, 128.25, 127.55, 127.39, 127.29, 127.08, 126.95,



126.88, 126.20, 125.44, 125.05, 123.23, 113.83, 56.78, 55.23, 48.38, 45.87, 45.48, 34.89, 33.14, 32.48, 27.80, 21.86, 13.94 ppm; **HRMS (ESI)**: C<sub>47</sub>H<sub>43</sub>O<sub>3</sub> [M + H]<sup>+</sup> calcd: 655.3206, found: 655.3179.

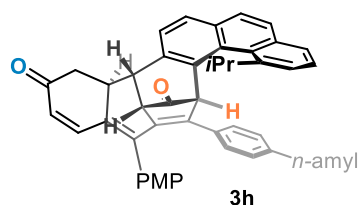

Prepared according to the general procedure on a 0.1 mmol scale and purified by flash chromatography (petroleum ether/ethyl acetate = 10/1 to 4/1). Yellow solid, m.p. 112 - 113 °C, 49.7 mg, 74% yield; **<sup>1</sup>H NMR** (300 MHz, CDCl<sub>3</sub>) δ 7.67 (d, *J* = 8.2 Hz, 1H), 7.62 – 7.54 (m, 1H), 7.54 – 7.46 (m, 3H), 7.41 (d, *J* = 8.2 Hz, 1H), 7.29 (d, *J* = 9.3 Hz, 2H), 7.02 (d, *J* = 8.4 Hz, 2H), 6.70 (d, *J* = 8.4 Hz, 2H), 6.17 (d, *J* = 7.9 Hz, 2H), 5.92 (d, *J* = 10.1 Hz, 1H), 5.81 (d, *J* = 7.9 Hz, 2H), 5.20 (s, 1H), 3.96 – 3.80 (m, 2H), 3.69 (s, 3H), 3.63 – 3.50 (m, 2H), 3.08 – 2.87 (m, 2H), 2.16 (t, *J* = 7.4 Hz, 2H), 1.79 (d, *J* = 6.4 Hz, 3H), 1.33 – 1.14 (m, 4H), 1.02 (dt, *J* = 14.6, 7.4 Hz, 2H), 0.84 (t, *J* = 7.3 Hz, 3H), 0.50 (d, *J* = 6.4 Hz, 3H) ppm; **<sup>13</sup>C NMR** (75 MHz, CDCl<sub>3</sub>) δ 209.87, 198.46, 159.55, 147.85, 146.83, 144.60, 143.42, 142.15, 136.31, 135.93, 134.05, 133.40, 133.19, 131.81, 130.95, 129.44, 129.09, 128.25, 127.55, 127.40, 127.31, 127.10, 126.94, 126.90, 126.21, 125.46, 125.06, 123.24, 113.85, 56.82, 56.73, 55.23, 48.39, 45.88, 45.49, 35.18, 32.48, 31.04, 30.68, 27.81, 22.47, 21.87, 14.05 ppm; **HRMS (ESI)**: C<sub>48</sub>H<sub>45</sub>O<sub>3</sub> [M + H]<sup>+</sup> calcd: 669.3362, found: 669.3342.

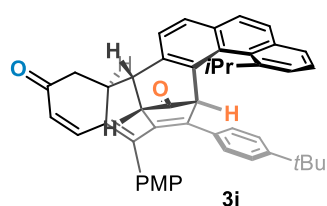

Prepared according to the general procedure on a 0.1 mmol scale and purified by flash chromatography (petroleum ether/ethyl acetate = 10/1 to 4/1). Yellow solid, m.p. 138 - 139 °C, 48.0 mg, 73% yield; **<sup>1</sup>H NMR** (300 MHz, CDCl<sub>3</sub>) δ 7.66 (d, *J* = 8.2 Hz, 1H), 7.62 – 7.54 (m, 1H), 7.54 – 7.45 (m, 3H), 7.40 (d, *J* = 8.2 Hz, 1H), 7.28 (t, *J* = 6.0 Hz, 2H), 7.01 (d, *J* = 8.4 Hz, 2H), 6.70 (d, *J* = 8.3 Hz, 2H), 6.35 (d, *J* = 8.1 Hz, 2H), 5.92 (d, *J* = 10.1 Hz, 1H), 5.82 (d, *J* = 8.1 Hz, 2H), 5.19 (s, 1H), 3.94 – 3.81 (m, 2H), 3.69 (s, 3H), 3.63 – 3.51 (m, 2H), 3.04 – 2.84 (m, 2H),

1.79 (d,  $J = 6.4$  Hz, 3H), 0.98 (s, 9H), 0.50 (d,  $J = 6.4$  Hz, 3H) ppm;  $^{13}\text{C}$  NMR (75 MHz,  $\text{CDCl}_3$ )  $\delta$  209.91, 198.48, 159.53, 150.16, 147.84, 146.83, 144.66, 143.42, 136.37, 135.87, 134.08, 133.42, 133.26, 131.80, 130.95, 129.29, 129.20, 128.27, 127.55, 127.39, 127.19, 127.12, 126.99, 126.89, 126.23, 125.46, 125.03, 123.71, 123.27, 113.88, 56.83, 56.78, 55.26, 48.34, 45.86, 45.49, 34.10, 32.46, 30.86, 27.83, 21.88 ppm; HRMS (ESI):  $\text{C}_{47}\text{H}_{43}\text{O}_3$   $[\text{M} + \text{H}]^+$  calcd: 655.3206, found: 655.3182.

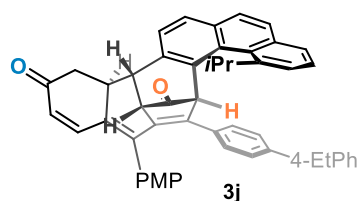

Prepared according to the general procedure on a 0.1 mmol scale and purified by flash chromatography (petroleum ether/ethyl acetate = 10/1 to 4/1). Yellow solid, m.p. 181 - 182 °C, 53.8 mg, 77% yield;  $^1\text{H}$  NMR (300 MHz,  $\text{CDCl}_3$ )  $\delta$  7.68 (d,  $J = 8.1$  Hz, 1H), 7.59 (d,  $J = 4.0$  Hz, 1H), 7.55 – 7.47 (m, 3H), 7.42 (d,  $J = 8.2$  Hz, 1H), 7.28 (q,  $J = 8.8$  Hz, 2H), 7.14 (s, 4H), 7.05 (d,  $J = 8.1$  Hz, 2H), 6.71 (d,  $J = 8.3$  Hz, 2H), 6.58 (d,  $J = 7.8$  Hz, 2H), 6.02 – 5.87 (m, 3H), 5.26 (s, 1H), 3.98 – 3.83 (m, 2H), 3.68 (s, 3H), 3.65 – 3.52 (m, 2H), 3.09 – 2.88 (m, 2H), 2.61 (q,  $J = 7.5$  Hz, 2H), 1.80 (d,  $J = 6.3$  Hz, 3H), 1.21 (t,  $J = 7.6$  Hz, 3H), 0.51 (d,  $J = 6.3$  Hz, 3H) ppm;  $^{13}\text{C}$  NMR (75 MHz,  $\text{CDCl}_3$ )  $\delta$  209.65, 198.44, 159.64, 147.36, 146.88, 144.52, 143.58, 143.27, 139.75, 137.63, 136.21, 135.93, 134.12, 134.07, 133.66, 131.92, 130.96, 129.15, 128.26, 128.18, 127.83, 127.60, 127.53, 127.21, 127.01, 126.97, 126.67, 126.38, 125.56, 125.34, 125.17, 123.34, 113.98, 56.93, 56.62, 55.26, 48.40, 45.89, 45.52, 32.55, 28.50, 27.86, 21.90, 15.65 ppm; HRMS (ESI):  $\text{C}_{51}\text{H}_{43}\text{O}_3$   $[\text{M} + \text{H}]^+$  calcd: 703.3206, found: 703.3197.

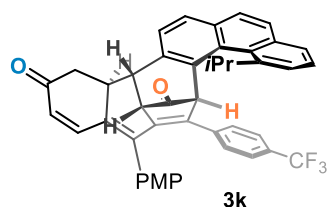

Prepared according to the general procedure on a 0.1 mmol scale and purified by flash chromatography (petroleum ether/ethyl acetate = 10/1 to 4/1). Yellow solid, m.p. 146 - 147 °C, 49.5 mg, 74% yield;  $^1\text{H}$  NMR (300 MHz,  $\text{CDCl}_3$ )  $\delta$  7.72 (d,  $J = 8.2$  Hz, 1H), 7.62 – 7.53 (m, 1H),

7.47 (dd,  $J = 13.5, 6.7$  Hz, 4H), 7.32 (d,  $J = 8.7$  Hz, 2H), 6.95 (d,  $J = 8.4$  Hz, 2H), 6.64 (dd,  $J = 20.5, 8.2$  Hz, 4H), 5.93 (t,  $J = 8.6$  Hz, 3H), 5.18 (s, 1H), 3.96 – 3.80 (m, 2H), 3.69 (s, 3H), 3.67 – 3.57 (m, 2H), 3.08 – 2.87 (m, 2H), 1.78 (d,  $J = 6.5$  Hz, 3H), 0.49 (d,  $J = 6.4$  Hz, 3H) ppm;  **$^{19}\text{F}$  NMR** (282 MHz,  $\text{CDCl}_3$ )  $\delta$  -62.98 ppm;  **$^{13}\text{C}$  NMR** (75 MHz,  $\text{CDCl}_3$ )  $\delta$  209.11, 198.19, 159.71, 146.71, 146.26, 144.27, 142.12, 136.25, 135.89, 135.48, 134.00, 133.90, 131.87, 130.83, 128.55, 128.24, 127.71, 127.64, 127.46, 127.26, 127.09, 126.80, 126.62, 125.44, 125.18, 123.66, 123.60, 123.32, 113.97, 57.00, 56.35, 55.24, 48.08, 45.66, 45.42, 32.46, 27.73, 21.77 ppm; **HRMS (ESI)**:  $\text{C}_{44}\text{H}_{34}\text{F}_3\text{O}_3$  [ $\text{M} + \text{H}$ ] $^+$  calcd: 667.2454, found: 667.2431.

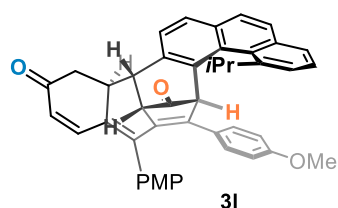

Prepared according to the general procedure on a 0.1 mmol scale and purified by flash chromatography (petroleum ether/ethyl acetate = 10/1 to 4/1). Yellow solid, m.p. 204 - 205 °C, 44.9 mg, 72% yield;  **$^1\text{H}$  NMR** (300 MHz,  $\text{CDCl}_3$ )  $\delta$  7.67 (d,  $J = 8.1$  Hz, 1H), 7.58 (s, 1H), 7.52 (t,  $J = 4.9$  Hz, 3H), 7.40 (d,  $J = 8.2$  Hz, 1H), 7.30 (t,  $J = 7.3$  Hz, 2H), 7.05 (d,  $J = 8.3$  Hz, 2H), 6.72 (d,  $J = 8.3$  Hz, 2H), 6.02 – 5.78 (m, 5H), 5.21 (s, 1H), 3.97 – 3.83 (m, 2H), 3.70 (s, 3H), 3.65 – 3.55 (m, 2H), 3.46 (s, 3H), 3.10 – 2.85 (m, 2H), 1.79 (d,  $J = 6.4$  Hz, 3H), 0.50 (d,  $J = 6.4$  Hz, 3H) ppm;  **$^{13}\text{C}$  NMR** (75 MHz,  $\text{CDCl}_3$ )  $\delta$  209.84, 198.49, 159.59, 158.55, 147.21, 146.89, 144.54, 143.50, 136.26, 136.03, 134.08, 133.41, 132.26, 131.82, 130.93, 129.03, 128.89, 128.16, 127.59, 127.41, 127.12, 126.97, 126.93, 126.15, 125.55, 125.09, 124.65, 123.25, 113.93, 112.28, 56.96, 56.47, 55.25, 54.93, 48.46, 45.91, 45.48, 32.54, 27.82, 21.87 ppm; **HRMS (ESI)**:  $\text{C}_{44}\text{H}_{37}\text{O}_4$  [ $\text{M} + \text{H}$ ] $^+$  calcd: 629.2686, found: 629.2664.

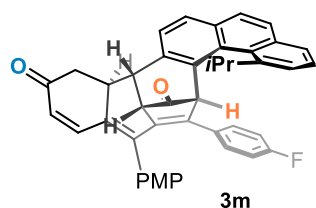

Prepared according to the general procedure on a 0.1 mmol scale and purified by flash chromatography (petroleum ether/ethyl acetate = 10/1 to 4/1). Yellow solid, m.p. 162 - 163 °C,

43.5 mg, 71% yield;  $^1\text{H NMR}$  (300 MHz,  $\text{CDCl}_3$ )  $\delta$  7.70 (d,  $J = 8.1$  Hz, 1H), 7.62 – 7.55 (m, 1H), 7.50 (t,  $J = 4.6$  Hz, 3H), 7.43 (d,  $J = 8.2$  Hz, 1H), 7.31 (t,  $J = 5.6$  Hz, 2H), 6.99 (d,  $J = 8.3$  Hz, 2H), 6.68 (d,  $J = 8.3$  Hz, 2H), 6.07 (t,  $J = 8.5$  Hz, 2H), 5.98 – 5.82 (m, 3H), 5.18 (s, 1H), 3.96 – 3.82 (m, 2H), 3.69 (s, 3H), 3.66 – 3.54 (m, 2H), 3.09 – 2.83 (m, 2H), 1.79 (d,  $J = 6.4$  Hz, 3H), 0.49 (d,  $J = 6.4$  Hz, 3H) ppm;  $^{19}\text{F NMR}$  (282 MHz,  $\text{CDCl}_3$ )  $\delta$  -113.39 ppm;  $^{13}\text{C NMR}$  (75 MHz,  $\text{CDCl}_3$ )  $\delta$  209.52, 198.32, 159.64, 146.78, 146.60, 144.39, 142.70, 136.08, 135.74, 134.13, 134.00, 133.57, 131.81, 130.88, 129.17, 129.06, 128.57, 128.22, 127.68, 127.52, 127.15, 127.00, 126.76, 126.47, 125.47, 125.14, 123.26, 113.92, 113.89, 113.64, 56.91, 56.56, 55.24, 48.26, 45.77, 45.45, 32.50, 27.76, 21.82 ppm; **HRMS (ESI)**:  $\text{C}_{43}\text{H}_{34}\text{FO}_3$   $[\text{M} + \text{H}]^+$  calcd: 617.2486, found: 617.2461.

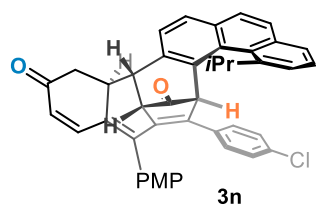

Prepared according to the general procedure on a 0.1 mmol scale and purified by flash chromatography (petroleum ether/ethyl acetate = 10/1 to 4/1). Yellow solid, m.p. 169 - 170 °C, 45.4 mg, 72% yield;  $^1\text{H NMR}$  (300 MHz,  $\text{CDCl}_3$ )  $\delta$  7.70 (d,  $J = 8.1$  Hz, 1H), 7.64 – 7.46 (m, 4H), 7.42 (d,  $J = 8.2$  Hz, 1H), 7.32 (q,  $J = 8.6$  Hz, 2H), 6.99 (d,  $J = 8.1$  Hz, 2H), 6.71 (d,  $J = 8.1$  Hz, 2H), 6.34 (d,  $J = 8.0$  Hz, 2H), 5.94 (d,  $J = 10.2$  Hz, 1H), 5.80 (d,  $J = 8.0$  Hz, 2H), 5.17 (s, 1H), 3.93 – 3.80 (m, 2H), 3.71 (s, 3H), 3.66 – 3.52 (m, 2H), 3.09 – 2.83 (m, 2H), 1.78 (d,  $J = 6.4$  Hz, 3H), 0.49 (d,  $J = 6.3$  Hz, 3H) ppm;  $^{13}\text{C NMR}$  (75 MHz,  $\text{CDCl}_3$ )  $\delta$  209.28, 198.27, 159.69, 146.80, 146.34, 144.30, 142.57, 135.95, 135.71, 134.86, 134.04, 133.76, 133.08, 131.88, 130.85, 130.67, 128.71, 128.59, 128.17, 127.65, 127.58, 127.24, 127.05, 127.00, 126.75, 126.59, 125.53, 125.20, 123.31, 113.99, 56.67, 55.28, 48.22, 45.76, 45.44, 32.51, 27.78, 21.82 ppm; **HRMS (ESI)**:  $\text{C}_{43}\text{H}_{33}\text{NaClO}_3$   $[\text{M} + \text{Na}]^+$  calcd: 655.2010, found: 655.1988.

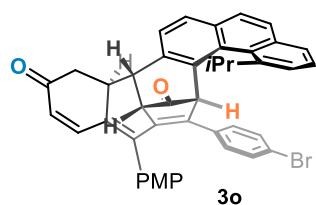

Prepared according to the general procedure on a 0.1 mmol scale and purified by flash chromatography (petroleum ether/ethyl acetate = 10/1 to 4/1). Yellow solid, m.p. 172 - 173 °C,

50.6 mg, 75% yield;  $^1\text{H NMR}$  (300 MHz,  $\text{CDCl}_3$ )  $\delta$  7.70 (d,  $J = 8.2$  Hz, 1H), 7.53 (dt,  $J = 16.0$ , 8.5 Hz, 4H), 7.42 (d,  $J = 8.2$  Hz, 1H), 7.32 (dd,  $J = 16.7$ , 8.5 Hz, 2H), 6.99 (d,  $J = 8.3$  Hz, 2H), 6.71 (d,  $J = 8.4$  Hz, 2H), 6.48 (d,  $J = 8.2$  Hz, 2H), 5.94 (d,  $J = 10.2$  Hz, 1H), 5.72 (d,  $J = 8.2$  Hz, 2H), 5.16 (s, 1H), 3.94 – 3.79 (m, 2H), 3.70 (d,  $J = 7.7$  Hz, 3H), 3.66 – 3.50 (m, 2H), 3.08 – 2.85 (m, 2H), 1.78 (d,  $J = 6.3$  Hz, 3H), 0.49 (d,  $J = 6.4$  Hz, 3H) ppm;  $^{13}\text{C NMR}$  (75 MHz,  $\text{CDCl}_3$ )  $\delta$  209.24, 198.27, 159.69, 146.79, 146.37, 144.30, 142.55, 135.93, 135.70, 134.96, 134.04, 133.78, 131.89, 131.15, 130.84, 129.95, 128.86, 128.75, 128.17, 127.66, 127.60, 127.26, 127.06, 126.73, 126.62, 125.54, 125.23, 123.33, 121.49, 114.02, 56.63, 55.29, 48.18, 45.76, 45.44, 32.51, 27.79, 21.83 ppm; **HRMS (ESI)**:  $\text{C}_{43}\text{H}_{34}\text{BrO}_3$   $[\text{M} + \text{H}]^+$  calcd: 677.1685, found: 677.1654.

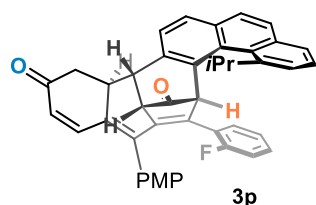

Prepared according to the general procedure on a 0.1 mmol scale and purified by flash chromatography (petroleum ether/ethyl acetate = 10/1 to 4/1). Yellow solid, m.p. 148 - 149 °C, 43.5 mg, 71% yield;  $^1\text{H NMR}$  (300 MHz,  $\text{CDCl}_3$ )  $\delta$  7.71 (d,  $J = 8.2$  Hz, 1H), 7.44 (ddd,  $J = 20.0$ , 16.1, 8.7 Hz, 4H), 7.30 (s, 1H), 7.22 (d,  $J = 8.5$  Hz, 1H), 7.15 (d,  $J = 8.5$  Hz, 1H), 6.91 (d,  $J = 8.4$  Hz, 2H), 6.68 – 6.38 (m, 3H), 6.14 (t,  $J = 8.2$  Hz, 2H), 5.94 (d,  $J = 10.1$  Hz, 1H), 5.58 (t,  $J = 7.3$  Hz, 1H), 5.20 (s, 1H), 3.90 (d,  $J = 4.5$  Hz, 1H), 3.87 – 3.74 (m, 1H), 3.68 (t,  $J = 9.7$  Hz, 1H), 3.65 – 3.42 (m, 4H), 2.97 (d,  $J = 9.7$  Hz, 2H), 1.79 (d,  $J = 6.5$  Hz, 3H), 0.47 (d,  $J = 6.4$  Hz, 3H) ppm;  $^{19}\text{F NMR}$  (282 MHz,  $\text{CDCl}_3$ )  $\delta$  -113.44 ppm;  $^{13}\text{C NMR}$  (75 MHz,  $\text{CDCl}_3$ )  $\delta$  210.32, 198.38, 159.40, 146.50, 144.88, 142.98, 142.39, 136.61, 136.50, 135.42, 133.59, 132.82, 131.62, 131.00, 129.20 ( $J_{\text{C-F}} = 8.6$  Hz), 129.01 ( $J_{\text{C-F}} = 3.6$  Hz), 128.51, 127.66, 127.36, 127.09, 126.99, 126.83, 126.35, 126.31, 124.98, 124.70, 123.13, 122.19 ( $J_{\text{C-F}} = 3.4$  Hz), 119.83 ( $J_{\text{C-F}} = 15.5$  Hz), 113.98 ( $J_{\text{C-F}} = 22.0$  Hz), 113.43, 57.62, 55.14, 55.12, 48.15, 45.54, 45.34, 32.37, 27.66, 21.78 ppm; **HRMS (ESI)**:  $\text{C}_{43}\text{H}_{34}\text{FO}_3$   $[\text{M} + \text{H}]^+$  calcd: 617.2486, found: 617.2466.

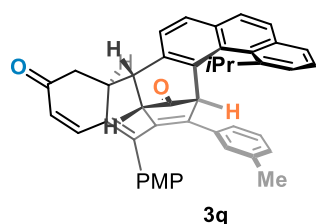

Prepared according to the general procedure on a 0.1 mmol scale and purified by flash chromatography (petroleum ether/ethyl acetate = 10/1 to 4/1). Yellow solid, m.p. 140 - 141 °C, 43.0 mg, 70% yield;  $^1\text{H NMR}$  (300 MHz,  $\text{CDCl}_3$ )  $\delta$  7.70 (d,  $J = 8.1$  Hz, 1H), 7.62 – 7.40 (m, 5H), 7.35 (q,  $J = 8.6$  Hz, 2H), 7.00 (d,  $J = 8.5$  Hz, 2H), 6.72 (d,  $J = 8.5$  Hz, 2H), 6.46 (d,  $J = 7.5$  Hz, 1H), 6.27 (t,  $J = 7.6$  Hz, 1H), 5.91 (d,  $J = 10.1$  Hz, 1H), 5.68 (d,  $J = 11.5$  Hz, 2H), 5.17 (s, 1H), 3.98 – 3.80 (m, 2H), 3.77 – 3.67 (m, 3H), 3.67 – 3.51 (m, 2H), 3.10 – 2.85 (m, 2H), 1.78 (d,  $J = 6.4$  Hz, 3H), 1.61 (s, 3H), 0.50 (d,  $J = 6.4$  Hz, 3H) ppm;  $^{13}\text{C NMR}$  (75 MHz,  $\text{CDCl}_3$ )  $\delta$  209.45, 198.45, 159.55, 148.09, 146.96, 144.51, 143.30, 136.47, 136.17, 136.06, 134.16, 134.13, 133.66, 132.30, 131.94, 130.88, 129.65, 128.33, 128.18, 128.08, 127.61, 127.54, 127.25, 127.05, 127.00, 126.68, 126.34, 125.64, 125.18, 124.63, 123.40, 113.91, 56.67, 55.27, 48.29, 45.89, 45.44, 32.47, 27.84, 21.91, 20.76 ppm; **HRMS (ESI)**:  $\text{C}_{44}\text{H}_{37}\text{O}_3$   $[\text{M} + \text{H}]^+$  calcd: 613.2736, found: 613.2714.

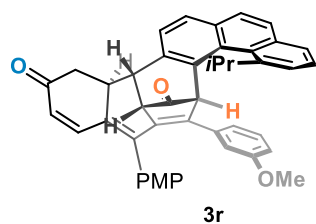

Prepared according to the general procedure on a 0.1 mmol scale and purified by flash chromatography (petroleum ether/ethyl acetate = 10/1 to 4/1). Yellow solid, m.p. 213 - 214 °C, 44.9 mg, 72% yield;  $^1\text{H NMR}$  (300 MHz,  $\text{CDCl}_3$ )  $\delta$  7.69 (d,  $J = 8.1$  Hz, 1H), 7.55 (s, 1H), 7.46 (dd,  $J = 17.3, 8.0$  Hz, 4H), 7.30 (d,  $J = 8.5$  Hz, 2H), 6.98 (d,  $J = 8.0$  Hz, 2H), 6.66 (d,  $J = 8.1$  Hz, 2H), 6.29 (t,  $J = 7.8$  Hz, 1H), 6.19 (d,  $J = 8.0$  Hz, 1H), 5.93 (d,  $J = 10.1$  Hz, 1H), 5.53 (s, 1H), 5.45 (d,  $J = 7.4$  Hz, 1H), 5.18 (s, 1H), 3.97 – 3.81 (m, 2H), 3.67 (s, 3H), 3.65 – 3.53 (m, 2H), 3.19 (s, 3H), 3.06 – 2.86 (m, 2H), 1.79 (d,  $J = 6.3$  Hz, 3H), 0.48 (d,  $J = 6.2$  Hz, 3H) ppm;  $^{13}\text{C NMR}$  (75 MHz,  $\text{CDCl}_3$ )  $\delta$  209.59, 198.38, 159.53, 158.12, 147.76, 146.83, 144.53, 142.99, 136.12, 135.93, 134.44, 134.08, 133.54, 133.45, 131.83, 130.88, 128.64, 128.33, 127.73, 127.60, 127.54, 127.11, 126.87, 126.35, 125.43, 125.11, 123.23, 120.07, 113.86, 113.79, 112.23, 57.02, 56.52, 55.21, 54.79, 48.31, 45.82, 45.48, 32.44, 27.78, 21.94 ppm; **HRMS (ESI)**:  $\text{C}_{44}\text{H}_{37}\text{O}_4$   $[\text{M} + \text{H}]^+$  calcd: 629.2686, found: 629.2664.

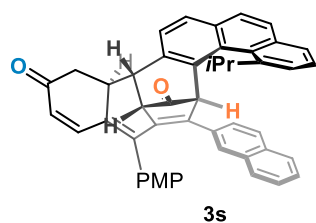

Prepared according to the general procedure on a 0.1 mmol scale and purified by flash chromatography (petroleum ether/ethyl acetate = 10/1 to 4/1). Yellow solid, m.p. 165 - 166 °C, 47.3 mg, 73% yield; **<sup>1</sup>H NMR** (300 MHz, CDCl<sub>3</sub>) δ 7.67 (d, *J* = 8.1 Hz, 1H), 7.64 – 7.56 (m, 1H), 7.56 – 7.46 (m, 3H), 7.42 (d, *J* = 8.2 Hz, 1H), 7.39 – 7.26 (m, 3H), 7.25 – 7.15 (m, 3H), 7.05 (d, *J* = 8.4 Hz, 2H), 6.92 – 6.79 (m, 2H), 6.70 (d, *J* = 8.4 Hz, 2H), 6.33 (s, 1H), 6.06 (d, *J* = 8.6 Hz, 1H), 5.93 (d, *J* = 10.1 Hz, 1H), 5.34 (s, 1H), 4.03 – 3.84 (m, 2H), 3.73 – 3.55 (m, 5H), 3.11 – 2.88 (m, 2H), 1.81 (d, *J* = 6.4 Hz, 3H), 0.52 (d, *J* = 6.4 Hz, 3H) ppm; **<sup>13</sup>C NMR** (75 MHz, CDCl<sub>3</sub>) δ 209.29, 198.43, 159.62, 147.57, 147.07, 144.40, 143.27, 136.16, 136.09, 134.88, 134.16, 133.91, 132.10, 132.02, 130.92, 129.85, 129.75, 128.22, 127.65, 127.39, 127.32, 127.09, 127.03, 126.88, 126.48, 126.25, 126.11, 125.74, 125.45, 125.36, 125.03, 123.49, 114.08, 57.01, 56.39, 55.25, 48.41, 45.93, 45.54, 32.59, 27.91, 21.99 ppm; **HRMS (ESI)**: C<sub>47</sub>H<sub>37</sub>O<sub>3</sub> [M + H]<sup>+</sup> calcd: 649.2736, found: 649.2725.

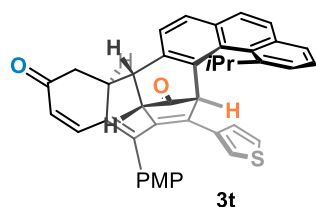

Prepared according to the general procedure on a 0.1 mmol scale and purified by flash chromatography (petroleum ether/ethyl acetate = 10/1 to 4/1). Yellow solid, m.p. 173 - 174 °C, 42.0 mg, 70% yield; **<sup>1</sup>H NMR** (300 MHz, CDCl<sub>3</sub>) δ 7.73 – 7.57 (m, 5H), 7.41 (d, *J* = 8.2 Hz, 2H), 7.32 (d, *J* = 8.5 Hz, 1H), 7.16 (d, *J* = 8.3 Hz, 2H), 6.84 (d, *J* = 8.3 Hz, 2H), 6.46 – 6.34 (m, 1H), 5.94 (d, *J* = 10.2 Hz, 1H), 5.53 (s, 1H), 5.47 (d, *J* = 5.0 Hz, 1H), 5.20 (s, 1H), 3.98 – 3.86 (m, 2H), 3.74 (s, *J* = 14.0 Hz, 3H), 3.64 – 3.49 (m, 2H), 3.09 – 2.84 (m, 2H), 1.79 (d, *J* = 6.4 Hz, 3H), 0.52 (d, *J* = 6.4 Hz, 3H) ppm; **<sup>13</sup>C NMR** (75 MHz, CDCl<sub>3</sub>) δ 209.25, 198.38, 159.90, 147.17, 144.22, 143.06, 142.50, 136.17, 135.85, 134.20, 133.92, 133.34, 132.10, 131.96, 131.07, 129.47, 128.00, 127.63, 127.40, 126.97, 126.89, 126.85, 126.43, 125.93, 125.39, 125.10, 124.14, 123.49, 114.44, 56.77, 56.24, 55.37, 48.49, 45.97, 45.44, 32.65, 27.91, 21.90 ppm; **HRMS (ESI)**: C<sub>41</sub>H<sub>33</sub>SO<sub>3</sub> [M +

$[H]^+$  calcd: 605.2144, found: 605.2117.

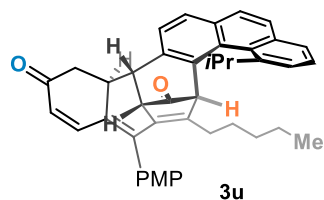

Prepared according to the general procedure on a 0.1 mmol scale and purified by flash chromatography (petroleum ether/ethyl acetate = 10/1 to 4/1). Yellow solid, m.p. 122 - 123 °C, 40.6 mg, 69% yield;  $^1H$  NMR (300 MHz,  $CDCl_3$ )  $\delta$  7.74 (d,  $J$  = 8.2 Hz, 1H), 7.64 – 7.55 (m, 2H), 7.55 – 7.35 (m, 5H), 7.09 (d,  $J$  = 8.4 Hz, 2H), 6.80 (d,  $J$  = 8.4 Hz, 2H), 5.89 (d,  $J$  = 10.1 Hz, 1H), 4.84 (s, 1H), 3.87 – 3.72 (m, 5H), 3.53 (t,  $J$  = 9.8 Hz, 1H), 3.41 (d,  $J$  = 4.5 Hz, 1H), 2.90 (d,  $J$  = 9.9 Hz, 2H), 1.76 (d,  $J$  = 6.4 Hz, 3H), 1.11 – 0.95 (m, 1H), 0.65 – 0.45 (m, 9H), 0.39 – 0.24 (m, 1H), 0.24 – 0.04 (m, 3H) ppm;  $^{13}C$  NMR (75 MHz,  $CDCl_3$ )  $\delta$  210.77, 198.55, 159.77, 153.01, 147.13, 144.91, 142.68, 136.46, 136.06, 134.05, 133.66, 131.86, 131.73, 130.86, 128.96, 128.38, 128.04, 127.20, 127.10, 126.73, 125.89, 125.72, 125.21, 123.31, 114.00, 55.74, 55.29, 54.26, 48.02, 45.82, 45.13, 32.57, 30.90, 27.72, 26.99, 25.72, 21.86, 21.72, 13.76 ppm; HRMS (ESI):  $C_{42}H_{41}O_3$   $[M + H]^+$  calcd: 593.3049, found: 593.3036.

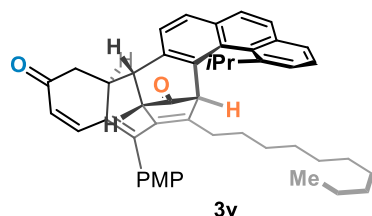

Prepared according to the general procedure on a 0.1 mmol scale and purified by flash chromatography (petroleum ether/ethyl acetate = 10/1 to 4/1). Yellow solid, m.p. 73 - 74 °C, 49.0 mg, 74% yield;  $^1H$  NMR (300 MHz,  $CDCl_3$ )  $\delta$  7.73 (d,  $J$  = 8.2 Hz, 1H), 7.62 – 7.56 (m, 2H), 7.55 – 7.50 (m, 1H), 7.48 (d,  $J$  = 5.9 Hz, 1H), 7.46 – 7.34 (m, 3H), 7.09 (d,  $J$  = 8.2 Hz, 2H), 6.80 (d,  $J$  = 8.2 Hz, 2H), 5.89 (d,  $J$  = 10.1 Hz, 1H), 4.83 (s, 1H), 3.86 – 3.70 (m, 5H), 3.53 (t,  $J$  = 9.8 Hz, 1H), 3.41 (d,  $J$  = 4.4 Hz, 1H), 2.90 (d,  $J$  = 9.9 Hz, 2H), 1.76 (d,  $J$  = 6.4 Hz, 3H), 1.35 – 1.13 (m, 8H), 1.03 (dt,  $J$  = 13.5, 6.6 Hz, 3H), 0.97 – 0.80 (m, 6H), 0.62 – 0.40 (m, 6H), 0.30 (dt,  $J$  = 16.2, 8.4 Hz, 1H), 0.14 (dt,  $J$  = 31.4, 7.1 Hz, 3H) ppm;  $^{13}C$  NMR (75 MHz,  $CDCl_3$ )  $\delta$  210.73, 198.54, 159.77, 153.01, 147.13, 144.90, 142.70, 136.47, 136.07, 134.04, 133.69, 131.86, 131.73, 130.87, 128.93,



128.40, 128.04, 127.20, 127.09, 126.75, 125.88, 125.73, 125.23, 123.31, 113.99, 55.79, 55.25, 54.26, 48.02, 45.82, 45.14, 32.56, 31.94, 29.48, 29.30, 29.28, 28.71, 27.72, 27.11, 26.10, 22.74, 21.87, 14.20 ppm; **HRMS (ESI)**: C<sub>47</sub>H<sub>51</sub>O<sub>3</sub> [M + H]<sup>+</sup> calcd: 663.3832, found: 663.3806.

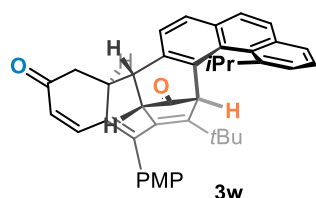

Prepared according to the general procedure on a 0.1 mmol scale and purified by flash chromatography (petroleum ether/ethyl acetate = 10/1 to 4/1). Yellow solid, m.p. 192 - 193 °C, 38.9 mg, 67% yield; **<sup>1</sup>H NMR** (300 MHz, Chloroform-*d*) δ 7.74 (d, *J* = 8.1 Hz, 1H), 7.61 (d, *J* = 7.5 Hz, 2H), 7.56 – 7.48 (m, 2H), 7.44 (t, *J* = 7.0 Hz, 3H), 7.08 (d, *J* = 7.6 Hz, 2H), 6.84 (d, *J* = 7.8 Hz, 2H), 5.92 (d, *J* = 10.2 Hz, 1H), 4.80 (s, 1H), 4.03 – 3.60 (m, 5H), 3.56 – 3.26 (m, 2H), 3.17 – 2.80 (m, 2H), 1.76 (d, *J* = 6.4 Hz, 3H), 0.49 (d, *J* = 6.6 Hz, 3H), -0.09 (s, 9H) ppm; **<sup>13</sup>C NMR** (75 MHz, CDCl<sub>3</sub>) δ 209.62, 198.51, 159.53, 158.15, 147.18, 144.59, 143.97, 137.30, 135.67, 134.05, 133.38, 133.24, 132.02, 131.03, 130.26, 128.39, 127.49, 127.40, 127.19, 127.11, 127.01, 126.10, 125.91, 125.33, 123.34, 113.83, 58.18, 55.30, 54.53, 48.60, 46.19, 45.23, 33.97, 32.33, 29.44, 27.92, 22.18 ppm; **HRMS (ESI)**: C<sub>41</sub>H<sub>39</sub>O<sub>3</sub> [M + H]<sup>+</sup> calcd: 579.2893, found: 579.2874.

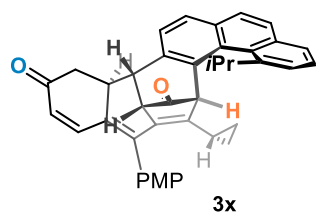

Prepared according to the general procedure on a 0.1 mmol scale and purified by flash chromatography (petroleum ether/ethyl acetate = 10/1 to 4/1). Yellow solid, m.p. 222 - 223 °C, 37.0 mg, 66% yield; **<sup>1</sup>H NMR** (300 MHz, CDCl<sub>3</sub>) δ 7.84 (d, *J* = 8.1 Hz, 1H), 7.78 – 7.60 (m, 4H), 7.54 (dd, *J* = 17.0, 8.6 Hz, 3H), 7.27 (d, *J* = 8.1 Hz, 2H), 6.91 (d, *J* = 8.0 Hz, 2H), 6.00 (d, *J* = 10.1 Hz, 1H), 4.53 (s, 1H), 3.95 – 3.76 (m, 5H), 3.69 (t, *J* = 9.8 Hz, 1H), 3.51 (d, *J* = 4.5 Hz, 1H), 3.01 (d, *J* = 10.0 Hz, 2H), 1.81 (d, *J* = 6.4 Hz, 3H), 0.55 (d, *J* = 6.4 Hz, 3H), 0.52 – 0.39 (m, 1H), 0.07 – -0.08 (m, 1H), -0.19 – -0.36 (m, 1H), -0.39 – -0.55 (m, 1H), -1.42 (dq, *J* = 10.4, 5.2 Hz, 1H) ppm; **<sup>13</sup>C NMR** (75 MHz, CDCl<sub>3</sub>) δ 209.43, 198.65, 159.72, 153.56, 147.13, 144.93, 142.97,

136.40, 136.04, 134.06, 133.70, 131.80, 131.69, 131.00, 129.00, 128.14, 128.08, 127.37, 127.32, 127.05, 126.68, 125.94, 125.76, 125.43, 123.34, 114.09, 55.25, 54.40, 52.41, 48.07, 46.00, 45.27, 32.52, 27.78, 21.99, 9.66, 5.27, 5.10 ppm; **HRMS (ESI)**: C<sub>40</sub>H<sub>35</sub>O<sub>3</sub> [M + H]<sup>+</sup> calcd: 563.2580, found: 563.2558.

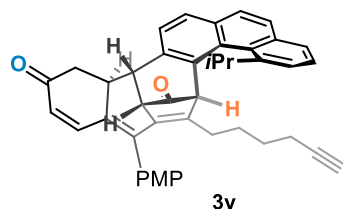

Prepared according to the general procedure on a 0.1 mmol scale and purified by flash chromatography (petroleum ether/ethyl acetate = 10/1 to 4/1). Yellow solid, m.p. 127 - 128 °C, 41.8 mg, 70% yield; **<sup>1</sup>H NMR** (300 MHz, CDCl<sub>3</sub>) δ 7.57 (d, *J* = 8.2 Hz, 1H), 7.46 – 7.19 (m, 7H), 6.91 (d, *J* = 8.4 Hz, 2H), 6.64 (d, *J* = 8.4 Hz, 2H), 5.72 (d, *J* = 10.1 Hz, 1H), 4.65 (s, 1H), 3.69 – 3.53 (m, 5H), 3.35 (t, *J* = 9.8 Hz, 1H), 3.24 (d, *J* = 4.4 Hz, 1H), 2.73 (d, *J* = 9.8 Hz, 2H), 1.64 – 1.53 (m, 4H), 1.21 (t, *J* = 7.2 Hz, 2H), 0.95 – 0.80 (m, 1H), 0.46 – 0.34 (m, 2H), 0.31 (d, *J* = 6.4 Hz, 3H), 0.25 – 0.13 (m, 1H), -0.00 (dtd, *J* = 20.9, 14.0, 6.9 Hz, 2H) ppm; **<sup>13</sup>C NMR** (75 MHz, CDCl<sub>3</sub>) δ 210.48, 198.49, 159.81, 151.99, 147.15, 144.80, 142.39, 136.34, 136.05, 134.23, 134.00, 132.05, 131.73, 130.82, 128.82, 128.35, 128.10, 127.29, 127.10, 126.67, 126.03, 125.78, 125.25, 123.39, 114.10, 84.18, 68.00, 55.67, 55.30, 54.25, 47.96, 45.79, 45.13, 32.57, 27.71, 27.61, 26.55, 25.31, 21.86, 17.55 ppm; **HRMS (ESI)**: C<sub>43</sub>H<sub>39</sub>O<sub>3</sub> [M + H]<sup>+</sup> calcd: 603.2893, found: 603.2867.

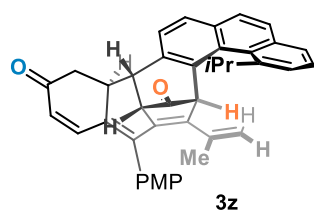

Prepared according to the general procedure on a 0.1 mmol scale and purified by flash chromatography (petroleum ether/ethyl acetate = 10/1 to 4/1). Yellow solid, m.p. 166 - 167 °C, 37.0 mg, 66% yield; **<sup>1</sup>H NMR** (300 MHz, CDCl<sub>3</sub>) δ 7.72 (d, *J* = 8.2 Hz, 1H), 7.55 (dd, *J* = 18.0, 7.7 Hz, 4H), 7.41 (q, *J* = 8.5 Hz, 3H), 7.05 (d, *J* = 8.3 Hz, 2H), 6.78 (d, *J* = 8.3 Hz, 2H), 5.93 (d, *J* = 10.2 Hz, 1H), 5.01 (s, 1H), 3.94 (s, 1H), 3.89 – 3.81 (m, 2H), 3.75 (s, 3H), 3.61 – 3.43 (m, 3H), 3.05 – 2.82 (m, 2H), 1.77 (d, *J* = 6.4 Hz, 3H), 0.61 (s, 3H), 0.49 (d, *J* = 6.4 Hz, 3H) ppm; **<sup>13</sup>C**

**NMR** (75 MHz, CDCl<sub>3</sub>)  $\delta$  209.94, 198.40, 159.50, 149.29, 146.96, 144.38, 143.35, 136.19, 136.01, 134.06, 133.89, 133.01, 131.79, 131.12, 129.12, 128.28, 127.48, 127.41, 127.14, 127.05, 126.97, 126.14, 125.74, 125.24, 123.26, 117.67, 113.70, 56.64, 55.24, 55.18, 48.52, 45.87, 45.30, 32.52, 27.80, 21.92, 21.18 ppm; **HRMS (ESI)**: C<sub>40</sub>H<sub>35</sub>O<sub>3</sub> [M + H]<sup>+</sup> calcd: 563.2580, found: 563.2554.

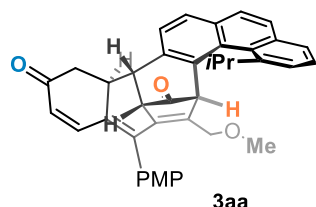

Prepared according to the general procedure on a 0.1 mmol scale and purified by flash chromatography (petroleum ether/ethyl acetate = 10/1 to 4/1). Yellow solid, m.p. 151 - 152 °C, 37.5 mg, 66% yield; **<sup>1</sup>H NMR** (300 MHz, CDCl<sub>3</sub>)  $\delta$  7.74 (d, *J* = 8.2 Hz, 1H), 7.63 – 7.56 (m, 2H), 7.50 (dd, *J* = 15.8, 6.6 Hz, 3H), 7.40 (dd, *J* = 8.3, 3.9 Hz, 2H), 7.09 (d, *J* = 8.2 Hz, 2H), 6.81 (d, *J* = 8.2 Hz, 2H), 5.92 (d, *J* = 10.1 Hz, 1H), 5.02 (s, 1H), 3.93 – 3.79 (m, 3H), 3.76 (s, 3H), 3.59 – 3.49 (m, 1H), 3.47 (d, *J* = 4.5 Hz, 1H), 2.97 – 2.82 (m, 3H), 2.34 (d, *J* = 12.9 Hz, 1H), 2.05 (s, 3H), 1.76 (d, *J* = 6.4 Hz, 3H), 0.48 (d, *J* = 6.3 Hz, 3H) ppm; **<sup>13</sup>C NMR** (75 MHz, CDCl<sub>3</sub>)  $\delta$  210.09, 198.36, 159.92, 148.07, 147.12, 144.55, 141.35, 136.35, 136.15, 135.57, 133.95, 132.68, 131.71, 130.82, 128.67, 128.24, 127.81, 127.36, 127.24, 127.01, 126.51, 125.51, 125.07, 123.40, 114.18, 65.67, 57.77, 55.29, 54.58, 54.46, 47.83, 45.64, 45.20, 32.54, 29.72, 27.80, 21.81 ppm; **HRMS (ESI)**: C<sub>39</sub>H<sub>35</sub>O<sub>4</sub> [M + H]<sup>+</sup> calcd: 567.2529, found: 567.2506.

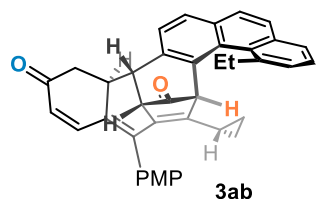

Prepared according to the general procedure on a 0.1 mmol scale and purified by flash chromatography (petroleum ether/ethyl acetate = 10/1 to 4/1). Yellow solid, m.p. 237 - 238 °C, 48.2 mg, 88% yield; **<sup>1</sup>H NMR** (300 MHz, Chloroform-*d*)  $\delta$  7.85 (d, *J* = 8.1 Hz, 1H), 7.74 (d, *J* = 7.1 Hz, 1H), 7.69 – 7.44 (m, 6H), 7.27 (d, *J* = 7.6 Hz, 2H), 6.92 (d, *J* = 7.4 Hz, 2H), 6.01 (d, *J* = 10.0 Hz, 1H), 4.47 (s, 1H), 4.00 – 3.82 (m, 4H), 3.73 (t, *J* = 9.9 Hz, 1H), 3.48 (dd, *J* = 21.1, 6.1 Hz, 2H), 3.15 (dq, *J* = 15.2, 7.6 Hz, 1H), 3.01 (d, *J* = 9.9 Hz, 2H), 1.09 – 0.84 (m, 3H), 0.47 (td, *J* =

8.3, 4.3 Hz, 1H), -0.00 (hept,  $J = 5.2$  Hz, 1H), -0.26 (dt,  $J = 10.7, 5.2$  Hz, 1H), -0.45 (qd,  $J = 8.6, 8.1, 5.5$  Hz, 1H), -1.41 (dq,  $J = 10.7, 5.5$  Hz, 1H) ppm;  $^{13}\text{C}$  NMR (75 MHz,  $\text{CDCl}_3$ )  $\delta$  209.16, 198.65, 159.72, 153.66, 144.99, 142.94, 142.18, 136.44, 136.25, 133.81, 133.72, 131.67, 131.63, 131.00, 128.96, 128.29, 128.18, 127.70, 127.11, 127.03, 125.81, 125.05, 114.08, 55.26, 54.34, 53.00, 47.88, 45.94, 45.10, 28.87, 17.66, 9.62, 5.22, 5.13 ppm; **HRMS (ESI)**:  $\text{C}_{39}\text{H}_{33}\text{O}_3$   $[\text{M} + \text{H}]^+$  calcd: 549.2423, found: 549.2407.

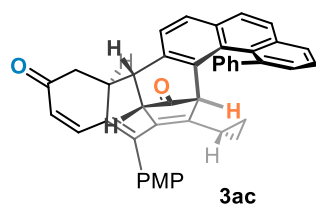

Prepared according to the general procedure on a 0.1 mmol scale and purified by flash chromatography (petroleum ether/ethyl acetate = 4/1 to 2/1). Yellow solid, m.p. 194 - 195 °C, 24.6 mg, 41% yield;  $^1\text{H}$  NMR (300 MHz, Chloroform- $d$ )  $\delta$  8.45 – 6.03 (m, 17H), 5.85 (d,  $J = 10.1$  Hz, 1H), 4.58 (s, 1H), 3.74 (d,  $J = 1.7$  Hz, 3H), 3.47 (dd,  $J = 15.9, 5.6$  Hz, 2H), 3.05 (d,  $J = 4.6$  Hz, 1H), 2.94 – 2.63 (m, 2H), 0.34 (td,  $J = 7.6, 3.8$  Hz, 1H), 0.07 – -0.15 (m, 1H), -0.21 (dt,  $J = 10.2, 5.5$  Hz, 1H), -0.50 (dt,  $J = 11.7, 6.2$  Hz, 1H), -1.32 (dq,  $J = 11.0, 5.6$  Hz, 1H) ppm;  $^{13}\text{C}$  NMR (75 MHz,  $\text{CDCl}_3$ )  $\delta$  206.43, 198.63, 159.69, 153.85, 144.92, 143.00, 142.35, 140.83, 136.99, 136.46, 135.15, 133.77, 131.82, 131.60, 130.93, 130.22, 129.04, 128.95, 128.81, 128.34, 127.74, 127.47, 127.09, 126.83, 126.75, 126.46, 125.63, 114.04, 55.23, 53.71, 51.70, 47.23, 45.83, 45.23, 9.66, 5.30, 5.18 ppm; **HRMS (ESI)**:  $\text{C}_{43}\text{H}_{33}\text{O}_3$   $[\text{M} + \text{H}]^+$  calcd: 597.2423, found: 597.2401.

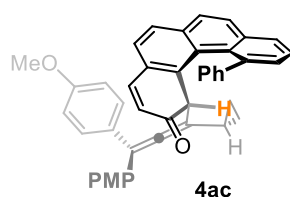

Prepared according to the general procedure on a 0.1 mmol scale and purified by flash chromatography (petroleum ether/ethyl acetate = 10/1 to 7/1). Yellow solid, m.p. 100 - 101 °C, 32.6 mg, 53% yield;  $^1\text{H}$  NMR (300 MHz, Chloroform- $d$ )  $\delta$  8.08 – 6.99 (m, 13H), 6.77 (d,  $J = 8.4$  Hz, 2H), 6.69 (d,  $J = 8.4$  Hz, 2H), 6.59 (d,  $J = 8.2$  Hz, 2H), 6.27 (d,  $J = 8.2$  Hz, 2H), 5.71 (d,  $J = 9.7$  Hz, 1H), 5.36 (s, 1H), 3.82 (s, 3H), 3.76 (s, 3H), 1.06 (tt,  $J = 9.1, 5.5$  Hz, 1H), 0.27 (d,  $J = 8.2$  Hz, 2H), -0.11 (dt,  $J = 8.3, 4.6$  Hz, 1H), -0.48 (dt,  $J = 10.4, 4.3$  Hz, 1H) ppm;  $^{13}\text{C}$  NMR (75 MHz,

CDCl<sub>3</sub>)  $\delta$  200.89, 198.10, 158.57, 158.38, 145.97, 143.42, 140.53, 140.44, 134.84, 134.73, 129.86, 129.28, 128.73, 128.59, 128.55, 128.49, 128.32, 128.21, 128.04, 127.76, 127.40, 127.23, 127.11, 126.86, 126.40, 126.22, 122.63, 113.33, 113.30, 112.42, 112.19, 57.77, 55.33, 55.26, 12.42, 7.08, 6.28 ppm; **HRMS (ESI)**: C<sub>44</sub>H<sub>35</sub>O<sub>3</sub> [M + H]<sup>+</sup> calcd: 611.2580, found: 611.2560.

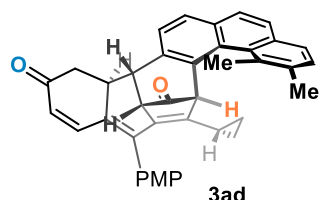

Prepared according to the general procedure on a 0.1 mmol scale and purified by flash chromatography (petroleum ether/ethyl acetate = 10/1 to 4/1). Yellow solid, m.p. 176 - 177 °C, 50.4 mg, 92% yield; **<sup>1</sup>H NMR** (300 MHz, CDCl<sub>3</sub>)  $\delta$  7.82 (d, *J* = 8.1 Hz, 1H), 7.66 (t, *J* = 9.3 Hz, 2H), 7.60 – 7.39 (m, 4H), 7.26 (d, *J* = 8.2 Hz, 2H), 6.91 (d, *J* = 8.2 Hz, 2H), 6.00 (d, *J* = 10.1 Hz, 1H), 4.38 (s, 1H), 4.10 – 3.80 (m, 4H), 3.73 (t, *J* = 9.9 Hz, 1H), 3.51 (d, *J* = 4.3 Hz, 1H), 3.00 (d, *J* = 9.9 Hz, 2H), 2.66 (s, 3H), 2.56 (s, 3H), 0.57 – 0.39 (m, 1H), 0.08 – -0.09 (m, 1H), -0.27 (td, *J* = 10.1, 5.2 Hz, 1H), -0.35 – -0.54 (m, 1H), -1.38 (dq, *J* = 10.3, 5.1 Hz, 1H) ppm; **<sup>13</sup>C NMR** (75 MHz, CDCl<sub>3</sub>)  $\delta$  209.16, 198.65, 159.72, 153.59, 144.97, 142.93, 136.38, 136.16, 136.01, 133.90, 133.39, 132.27, 131.86, 131.62, 130.99, 129.44, 129.16, 128.99, 128.66, 128.00, 127.09, 126.93, 125.82, 124.86, 124.80, 114.08, 55.25, 54.40, 52.98, 47.90, 45.93, 45.08, 21.32, 20.74, 9.64, 5.20 ppm; **HRMS (ESI)**: C<sub>39</sub>H<sub>33</sub>O<sub>3</sub> [M + H]<sup>+</sup> calcd: 549.2423, found: 549.2409.

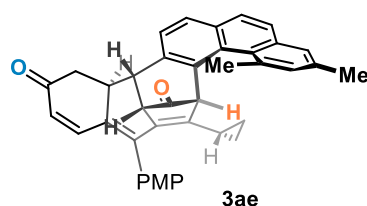

Prepared according to the general procedure on a 0.1 mmol scale and purified by flash chromatography (petroleum ether/ethyl acetate = 10/1 to 4/1). Yellow solid, m.p. 228 - 229 °C, 39.9 mg, 73% yield; **<sup>1</sup>H NMR** (300 MHz, CDCl<sub>3</sub>)  $\delta$  7.78 (d, *J* = 8.1 Hz, 1H), 7.62 (d, *J* = 10.1 Hz, 1H), 7.55 – 7.39 (m, 4H), 7.31 (s, 1H), 7.24 (d, *J* = 8.3 Hz, 2H), 6.89 (d, *J* = 8.3 Hz, 2H), 5.98 (d, *J* = 10.1 Hz, 1H), 4.37 (s, 1H), 3.83 (s, 4H), 3.72 (t, *J* = 9.9 Hz, 1H), 3.48 (d, *J* = 4.3 Hz, 1H), 2.97 (d, *J* = 10.0 Hz, 2H), 2.72 (s, 3H), 2.57 (s, 3H), 0.58 – 0.38 (m, 1H), 0.06 – -0.08 (m, 1H), -0.21 (td, *J* = 10.2, 5.3 Hz, 1H), -0.35 – -0.53 (m, 1H), -1.31 (dq, *J* = 10.5, 5.3 Hz, 1H) ppm; **<sup>13</sup>C NMR**

(75 MHz, CDCl<sub>3</sub>)  $\delta$  209.07, 198.67, 159.72, 153.69, 144.99, 142.96, 136.50, 136.41, 136.04, 135.03, 134.25, 133.80, 131.63, 131.40, 131.01, 130.60, 129.01, 128.87, 127.77, 127.30, 127.15, 126.96, 125.82, 125.66, 124.88, 114.08, 55.25, 54.43, 53.11, 47.92, 45.90, 45.04, 23.04, 21.26, 9.71, 5.23 ppm; **HRMS (ESI)**: C<sub>39</sub>H<sub>33</sub>O<sub>3</sub> [M + H]<sup>+</sup> calcd: 549.2423, found: 549.2400.

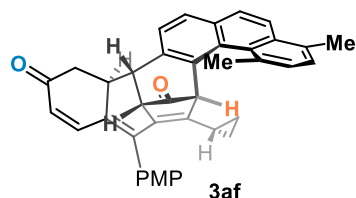

Prepared according to the general procedure on a 0.1 mmol scale and purified by flash chromatography (petroleum ether/ethyl acetate = 10/1 to 4/1). Yellow solid, m.p. 194 - 195 °C, 50.9 mg, 93% yield; **<sup>1</sup>H NMR** (300 MHz, Chloroform-*d*)  $\delta$  7.82 (t, *J* = 9.3 Hz, 2H), 7.64 (d, *J* = 10.1 Hz, 1H), 7.53 (dd, *J* = 8.6, 5.3 Hz, 2H), 7.40 (q, *J* = 7.6 Hz, 2H), 7.32 – 7.17 (m, 2H), 7.03 – 6.67 (m, 2H), 6.00 (d, *J* = 10.0 Hz, 1H), 4.41 (s, 1H), 3.84 (d, *J* = 1.5 Hz, 4H), 3.73 (t, *J* = 9.8 Hz, 1H), 3.49 (d, *J* = 4.5 Hz, 1H), 2.99 (d, *J* = 9.9 Hz, 2H), 2.74 (d, *J* = 13.7 Hz, 6H), 0.46 (dq, *J* = 8.9, 5.5, 4.5 Hz, 1H), -0.00 (tq, *J* = 8.2, 5.2 Hz, 1H), -0.22 (dq, *J* = 10.5, 5.3 Hz, 1H), -0.46 (td, *J* = 9.1, 4.4 Hz, 1H), -1.37 (dq, *J* = 10.6, 5.4 Hz, 1H) ppm; **<sup>13</sup>C NMR** (75 MHz, CDCl<sub>3</sub>)  $\delta$  209.16, 198.75, 159.70, 153.78, 145.06, 142.98, 136.47, 136.38, 133.74, 132.92, 132.69, 131.62, 131.30, 131.02, 130.98, 129.36, 129.03, 128.96, 128.24, 128.13, 128.04, 127.03, 125.79, 125.44, 123.00, 114.07, 55.27, 54.37, 52.97, 47.87, 45.92, 45.06, 22.96, 19.57, 9.67, 5.28, 5.18 ppm; **HRMS (ESI)**: C<sub>39</sub>H<sub>33</sub>O<sub>3</sub> [M + H]<sup>+</sup> calcd: 549.2423, found: 549.2411.

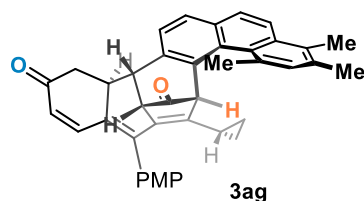

Prepared according to the general procedure on a 0.1 mmol scale and purified by flash chromatography (petroleum ether/ethyl acetate = 10/1 to 4/1). Yellow solid, m.p. 182 - 183 °C, 43.4 mg, 77% yield; **<sup>1</sup>H NMR** (300 MHz, CDCl<sub>3</sub>)  $\delta$  7.83 (dd, *J* = 13.0, 8.6 Hz, 2H), 7.64 (d, *J* = 10.1 Hz, 1H), 7.57 – 7.43 (m, 2H), 7.33 – 7.19 (m, 3H), 6.91 (d, *J* = 8.2 Hz, 2H), 6.00 (d, *J* = 10.1 Hz, 1H), 4.39 (s, 1H), 3.85 (s, 4H), 3.74 (t, *J* = 9.8 Hz, 1H), 3.49 (d, *J* = 4.4 Hz, 1H), 2.99 (d, *J* = 10.0 Hz, 2H), 2.69 (d, *J* = 7.3 Hz, 6H), 2.57 (s, 3H), 0.56 – 0.40 (m, 1H), 0.07 – -0.09 (m, 1H), -0.21 (td, *J* = 10.2, 5.2 Hz, 1H), -0.34 – -0.55 (m, 1H), -1.20 – -1.42 (m, 1H) ppm; **<sup>13</sup>C NMR** (75

MHz, CDCl<sub>3</sub>)  $\delta$  209.18, 198.70, 159.70, 153.80, 145.01, 142.99, 136.34, 136.17, 134.65, 133.71, 132.96, 132.11, 131.65, 131.01, 130.94, 130.87, 129.20, 129.04, 128.67, 127.89, 127.73, 126.84, 125.78, 125.23, 123.15, 114.07, 55.25, 54.42, 53.07, 47.92, 45.91, 45.04, 22.74, 20.59, 14.82, 9.70, 5.30, 5.23 ppm; **HRMS (ESI)**: C<sub>40</sub>H<sub>35</sub>O<sub>3</sub> [M + H]<sup>+</sup> calcd: 563.2580, found: 563.2560.

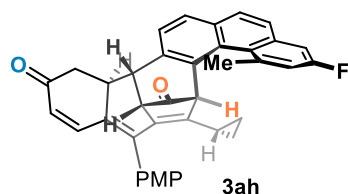

Prepared according to the general procedure on a 0.1 mmol scale and purified by flash chromatography (petroleum ether/ethyl acetate = 10/1 to 4/1). Yellow solid, m.p. 167 - 168 °C, 49.6 mg, 89% yield; **<sup>1</sup>H NMR** (300 MHz, Chloroform-*d*)  $\delta$  7.75 (d, *J* = 8.1 Hz, 1H), 7.57 (d, *J* = 10.1 Hz, 1H), 7.44 (q, *J* = 8.8, 6.5 Hz, 3H), 7.38 – 7.06 (m, 5H), 6.83 (d, *J* = 8.2 Hz, 2H), 5.92 (d, *J* = 10.1 Hz, 1H), 4.23 (s, 1H), 3.77 (s, 4H), 3.65 (t, *J* = 9.9 Hz, 1H), 3.43 (d, *J* = 4.4 Hz, 1H), 2.91 (d, *J* = 9.9 Hz, 2H), 2.70 (s, 3H), 0.41 (q, *J* = 6.9 Hz, 1H), -0.02 (p, *J* = 7.2 Hz, 1H), -0.26 (dq, *J* = 10.8, 5.3 Hz, 1H), -0.48 (p, *J* = 8.1 Hz, 1H), -1.43 (dq, *J* = 10.9, 5.5 Hz, 1H) ppm; **<sup>19</sup>F NMR** (282 MHz, CDCl<sub>3</sub>)  $\delta$  -115.15 ppm; **<sup>13</sup>C NMR** (75 MHz, CDCl<sub>3</sub>)  $\delta$  208.85, 198.66, 160.80 (*J*<sub>C-F</sub> = 247.8 Hz), 159.74, 153.44, 144.99, 142.87, 138.23 (*J*<sub>C-F</sub> = 7.9 Hz), 137.10, 136.07, 135.40 (*J*<sub>C-F</sub> = 9.1 Hz), 133.91, 131.61, 131.17, 131.01, 128.86, 128.63, 128.21, 127.39, 127.10, 126.49 (*J*<sub>C-F</sub> = 3.6 Hz), 126.02, 125.88, 116.84 (*J*<sub>C-F</sub> = 22.3 Hz), 114.10, 109.59 (*J*<sub>C-F</sub> = 20.8 Hz), 55.27, 54.31, 52.98, 47.90, 45.88, 45.03, 23.39, 9.66, 5.29, 5.23 ppm; **HRMS (ESI)**: C<sub>38</sub>H<sub>30</sub>FO<sub>3</sub> [M + H]<sup>+</sup> calcd: 553.2173, found: 553.2149.

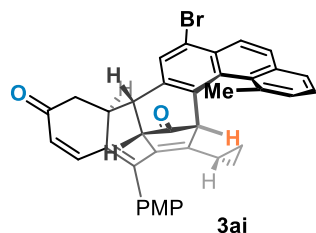

Prepared according to the general procedure on a 0.1 mmol scale and purified by flash chromatography (petroleum ether/ethyl acetate = 10/1 to 4/1). Yellow solid, m.p. 186 - 187 °C, 41.1 mg, 67% yield; **<sup>1</sup>H NMR** (300 MHz, CDCl<sub>3</sub>)  $\delta$  7.90 (d, *J* = 8.8 Hz, 1H), 7.73 (d, *J* = 8.5 Hz, 2H), 7.68 – 7.53 (m, 3H), 7.49 (d, *J* = 7.1 Hz, 1H), 7.25 (d, *J* = 8.3 Hz, 2H), 6.89 (d, *J* = 8.3 Hz,

2H), 5.99 (d,  $J = 10.1$  Hz, 1H), 4.31 (s, 1H), 3.83 (s, 3H), 3.79 (d,  $J = 4.2$  Hz, 1H), 3.66 (t,  $J = 9.8$  Hz, 1H), 3.47 (d,  $J = 4.1$  Hz, 1H), 2.96 (d,  $J = 9.9$  Hz, 2H), 2.72 (s, 3H), 0.45 (dd,  $J = 11.4, 6.6$  Hz, 1H), 0.05 – -0.08 (m, 1H), -0.27 (dd,  $J = 9.3, 5.0$  Hz, 1H), -0.35 – -0.52 (m, 1H), -1.33 – -1.52 (m, 1H) ppm;  $^{13}\text{C}$  NMR (75 MHz,  $\text{CDCl}_3$ )  $\delta$  208.16, 198.36, 159.78, 153.58, 144.88, 142.72, 137.33, 136.03, 135.62, 133.93, 133.84, 132.00, 131.61, 131.00, 130.70, 130.29, 129.28, 128.87, 128.79, 128.58, 127.31, 126.02, 124.96, 124.36, 121.96, 114.14, 55.26, 54.09, 52.96, 47.40, 45.78, 45.04, 22.97, 9.62, 5.27 ppm; **HRMS (ESI)**:  $\text{C}_{38}\text{H}_{30}\text{BrO}_3$   $[\text{M} + \text{H}]^+$  calcd: 613.1372, found: 613.1357.

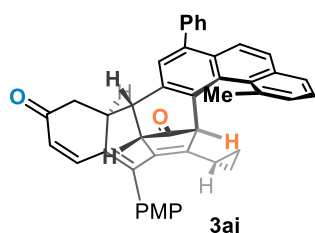

Prepared according to the general procedure on a 0.1 mmol scale and purified by flash chromatography (petroleum ether/ethyl acetate = 10/1 to 4/1). Yellow solid, m.p. 173 - 174 °C, 50.3 mg, 82% yield;  $^1\text{H}$  NMR (300 MHz, Chloroform- $d$ )  $\delta$  7.61 (dd,  $J = 8.9, 6.0$  Hz, 2H), 7.56 – 7.35 (m, 11H), 7.23 (d,  $J = 9.3$  Hz, 2H), 7.02 – 6.71 (m, 2H), 5.94 (d,  $J = 10.0$  Hz, 1H), 4.33 (s, 1H), 3.80 (d,  $J = 4.9$  Hz, 1H), 3.77 (s, 3H), 3.68 (t,  $J = 9.9$  Hz, 1H), 3.43 (d,  $J = 4.6$  Hz, 1H), 2.89 (d,  $J = 10.6$  Hz, 2H), 2.72 (s, 3H), 0.46 (tt,  $J = 8.6, 5.3$  Hz, 1H), -0.04 (ddd,  $J = 14.3, 6.6, 2.9$  Hz, 1H), -0.27 (dq,  $J = 10.5, 5.4$  Hz, 1H), -0.36 – -0.58 (m, 1H), -1.37 (dq,  $J = 10.7, 5.5$  Hz, 1H) ppm;  $^{13}\text{C}$  NMR (75 MHz,  $\text{CDCl}_3$ )  $\delta$  209.07, 198.63, 159.78, 153.77, 145.02, 143.02, 139.85, 139.32, 136.03, 135.47, 135.38, 133.85, 133.81, 131.66, 131.08, 130.67, 129.66, 129.50, 129.27, 129.07, 128.97, 128.80, 128.56, 127.83, 126.80, 126.71, 125.91, 124.55, 124.13, 114.12, 55.28, 54.30, 52.90, 47.91, 45.97, 45.34, 23.10, 9.76, 5.33 ppm; **HRMS (ESI)**:  $\text{C}_{44}\text{H}_{35}\text{O}_3$   $[\text{M} + \text{H}]^+$  calcd: 611.2580, found: 611.2562.

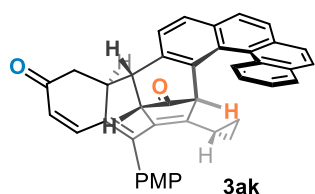

Prepared according to the general procedure on a 0.1 mmol scale and purified by flash chromatography (petroleum ether/ethyl acetate = 10/1 to 4/1). Yellow solid, m.p. 221 - 222 °C,



51.3 mg, 90% yield;  $^1\text{H NMR}$  (300 MHz,  $\text{CDCl}_3$ )  $\delta$  8.47 (d,  $J = 8.3$  Hz, 1H), 8.26 – 7.99 (m, 5H), 7.96 (d,  $J = 12.9$  Hz, 2H), 7.87 – 7.64 (m, 3H), 7.35 (d,  $J = 8.3$  Hz, 2H), 7.00 (d,  $J = 8.3$  Hz, 2H), 6.15 (d,  $J = 10.1$  Hz, 1H), 4.58 (s, 1H), 4.07 (d,  $J = 4.4$  Hz, 1H), 3.96 (s, 3H), 3.93 – 3.84 (m, 1H), 3.66 (d,  $J = 4.4$  Hz, 1H), 3.17 (d,  $J = 9.8$  Hz, 2H), 0.65 – 0.42 (m, 1H), -0.01 (dd,  $J = 11.3, 6.4$  Hz, 1H), -0.23 – -0.59 (m, 2H), -1.17 – -1.44 (m, 1H) ppm;  $^{13}\text{C NMR}$  (75 MHz,  $\text{CDCl}_3$ )  $\delta$  209.45, 198.60, 159.71, 153.36, 144.95, 142.87, 137.31, 136.79, 134.29, 132.10, 131.77, 131.37, 130.98, 130.59, 129.83, 128.95, 128.01, 127.93, 127.86, 127.42, 127.16, 126.89, 126.70, 126.28, 125.98, 125.75, 114.06, 55.23, 54.47, 52.64, 48.58, 45.99, 45.10, 9.47, 5.11, 5.06 ppm; **HRMS (ESI)**:  $\text{C}_{41}\text{H}_{31}\text{O}_3$   $[\text{M} + \text{H}]^+$  calcd: 571.2267, found: 571.2252.

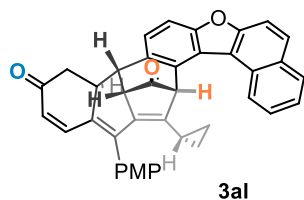

Prepared according to the general procedure on a 0.1 mmol scale and purified by flash chromatography (petroleum ether/ethyl acetate = 7/1 to 2/1). Yellow solid, m.p. 224 - 225 °C, 33.7 mg, 60% yield;  $^1\text{H NMR}$  (300 MHz, Chloroform-*d*)  $\delta$  8.59 (d,  $J = 8.5$  Hz, 1H), 7.98 (dd,  $J = 20.5, 8.5$  Hz, 2H), 7.70 (d,  $J = 8.7$  Hz, 2H), 7.66 – 7.43 (m, 3H), 7.43 – 7.13 (m, 2H), 6.87 (d,  $J = 8.4$  Hz, 2H), 5.94 (d,  $J = 10.1$  Hz, 1H), 5.04 (s, 1H), 3.79 (s, 3H), 3.73 – 3.54 (m, 2H), 3.44 (d,  $J = 4.7$  Hz, 2H), 3.03 – 2.78 (m, 2H), 0.68 (p,  $J = 6.7$  Hz, 1H), 0.08 (q,  $J = 7.5$  Hz, 2H), -0.12 – -0.33 (m, 1H), -0.45 (td,  $J = 7.8, 3.8$  Hz, 1H) ppm;  $^{13}\text{C NMR}$  (75 MHz,  $\text{CDCl}_3$ )  $\delta$  208.82, 198.55, 159.82, 155.53, 154.30, 152.87, 144.87, 142.78, 134.83, 133.69, 133.30, 131.51, 131.14, 131.11, 130.10, 129.73, 129.16, 128.01, 127.10, 125.95, 125.63, 124.45, 123.55, 116.95, 114.18, 112.57, 111.32, 55.28, 54.58, 53.91, 48.72, 46.02, 45.17, 10.01, 6.07, 5.76 ppm; **HRMS (ESI)**:  $\text{C}_{39}\text{H}_{29}\text{O}_4$   $[\text{M} + \text{H}]^+$  calcd: 561.2060, found: 561.2056.

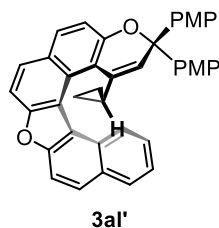

Prepared according to the general procedure on a 0.1 mmol scale and purified by flash

chromatography (petroleum ether/ethyl acetate = 20/1 to 10/1). White solid, m.p. 194 - 195 °C, 20.3 mg, 35% yield;  $^1\text{H NMR}$  (300 MHz, Chloroform-*d*)  $\delta$  8.04 (d,  $J$  = 8.5 Hz, 1H), 7.99 – 7.53 (m, 8H), 7.53 – 7.16 (m, 5H), 7.03 (d,  $J$  = 8.4 Hz, 2H), 6.85 (d,  $J$  = 8.5 Hz, 2H), 5.47 (s, 1H), 3.78 (s, 6H), 0.26 – -0.13 (m, 4H), -0.32 (t,  $J$  = 9.3 Hz, 1H) ppm;  $^{13}\text{C NMR}$  (75 MHz,  $\text{CDCl}_3$ )  $\delta$  159.03, 158.87, 155.46, 153.50, 152.87, 140.88, 139.30, 135.36, 132.12, 130.37, 129.95, 128.97, 128.74, 128.24, 127.71, 127.16, 126.70, 125.22, 124.07, 121.62, 119.34, 119.19, 116.45, 116.15, 113.54, 113.42, 112.18, 110.28, 81.98, 55.32, 13.29, 11.31, 10.33 ppm; **HRMS (ESI)**:  $\text{C}_{40}\text{H}_{31}\text{O}_4$  [ $\text{M} + \text{H}$ ] $^+$  calcd: 575.2216, found: 575.2189.

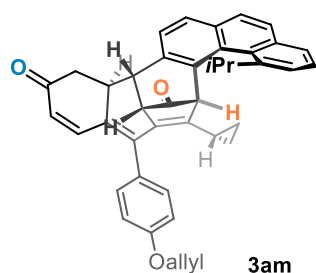

Prepared according to the general procedure on a 0.1 mmol scale and purified by flash chromatography (petroleum ether/ethyl acetate = 10/1 to 4/1). Yellow solid, m.p. 146 - 147 °C, 43.2 mg, 74% yield;  $^1\text{H NMR}$  (300 MHz,  $\text{CDCl}_3$ )  $\delta$  7.84 (d,  $J$  = 8.1 Hz, 1H), 7.77 – 7.45 (m, 7H), 7.26 (d,  $J$  = 8.3 Hz, 2H), 6.93 (d,  $J$  = 8.3 Hz, 2H), 6.16 – 6.04 (m, 1H), 6.00 (d,  $J$  = 10.1 Hz, 1H), 5.41 (dd,  $J$  = 34.0, 13.8 Hz, 2H), 4.63 – 4.50 (m, 3H), 3.91 – 3.77 (m, 2H), 3.68 (t,  $J$  = 9.9 Hz, 1H), 3.50 (d,  $J$  = 4.5 Hz, 1H), 3.01 (d,  $J$  = 10.0 Hz, 2H), 1.81 (d,  $J$  = 6.4 Hz, 3H), 0.55 (d,  $J$  = 6.4 Hz, 3H), 0.47 (dd,  $J$  = 11.3, 6.8 Hz, 1H), 0.07 – -0.09 (m, 1H), -0.27 (td,  $J$  = 10.2, 5.2 Hz, 1H), -0.38 – -0.57 (m, 1H), -1.41 (td,  $J$  = 10.4, 5.4 Hz, 1H) ppm;  $^{13}\text{C NMR}$  (75 MHz,  $\text{CDCl}_3$ )  $\delta$  209.42, 198.66, 158.75, 153.57, 147.14, 144.92, 142.94, 136.39, 136.03, 134.06, 133.70, 132.82, 131.80, 131.70, 131.00, 129.16, 128.13, 128.08, 127.37, 127.32, 127.05, 126.68, 125.94, 125.78, 125.42, 123.33, 118.00, 114.82, 68.77, 54.40, 52.41, 48.06, 45.99, 45.27, 32.52, 27.78, 21.98, 9.65, 5.27, 5.11 ppm; **HRMS (ESI)**:  $\text{C}_{42}\text{H}_{37}\text{O}_3$  [ $\text{M} + \text{H}$ ] $^+$  calcd: 589.2736, found: 589.2715.

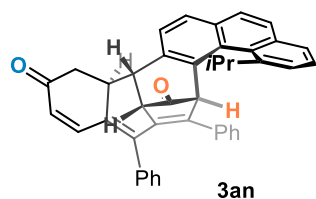

Yellow solid, m.p. 225 - 226 °C;  $^1\text{H NMR}$  (300 MHz, Chloroform-*d*)  $\delta$  7.72 (d,  $J$  = 8.0 Hz, 1H),

7.63 – 7.38 (m, 5H), 7.38 – 7.27 (m, 2H), 7.15 (dd,  $J = 4.4, 2.3$  Hz, 3H), 7.11 – 6.98 (m, 2H), 6.62 (t,  $J = 7.4$  Hz, 1H), 6.45 – 6.27 (m, 2H), 5.93 (d,  $J = 10.2$  Hz, 1H), 5.81 (d,  $J = 7.7$  Hz, 2H), 5.18 (s, 1H), 3.88 (dd,  $J = 14.5, 5.9$  Hz, 2H), 3.63 (t,  $J = 7.9$  Hz, 2H), 3.00 (q,  $J = 7.3, 5.7$  Hz, 2H), 1.78 (d,  $J = 6.5$  Hz, 3H), 0.50 (d,  $J = 6.5$  Hz, 3H) ppm;  $^{13}\text{C}$  NMR (75 MHz,  $\text{CDCl}_3$ )  $\delta$  209.60, 198.46, 148.14, 146.80, 144.38, 143.28, 136.91, 136.17, 135.74, 134.14, 134.02, 134.00, 132.24, 131.88, 129.57, 128.45, 128.33, 128.26, 127.67, 127.54, 127.32, 127.27, 127.19, 127.06, 126.85, 126.81, 125.53, 125.10, 123.34, 56.95, 56.50, 48.19, 45.77, 45.41, 32.48, 27.86, 21.89 ppm; HRMS (ESI):  $\text{C}_{42}\text{H}_{33}\text{O}_2$   $[\text{M} + \text{H}]^+$  calcd: 569.2474, found: 569.2457.

## 7. General Procedures for the Transformations of Double Dearomatization Product **3e**

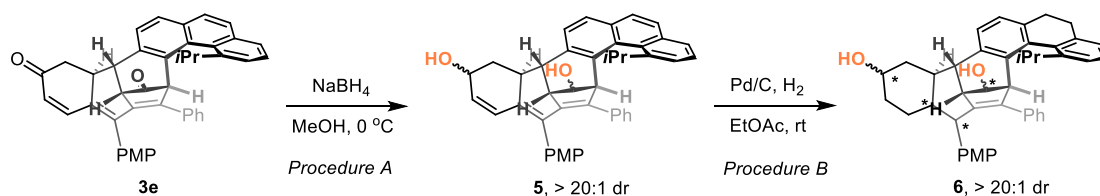

*Procedure A:* To a solution of polycyclic diketone **3e** (0.1 mmol, 1.0 equiv) in methanol (1.0 mL) was added  $\text{NaBH}_4$  (0.5 mmol, 5.0 equiv) slowly at  $0^\circ\text{C}$ . The resulting reaction mixture was then stirred for 1 h. After the complete consumption of **3e** (monitored by TLC), the reaction was quenched by water and the aqueous layer was extracted with EtOAc for three times. The combined organic layers were washed with brine, dried, and concentrated. The resulting residue was then purified by silica gel column chromatography (eluting with hexane/ethyl acetate = 4:1 to 2:1) to afford polycyclic diol **5** in 83% yield. White solid, m.p.  $174\text{--}175^\circ\text{C}$ ;  $^1\text{H}$  NMR (300 MHz, Chloroform- $d$ )  $\delta$  7.72 – 7.34 (m, 5H), 7.23 (s, 1H), 7.17 (s, 2H), 6.99 (d,  $J = 9.0$  Hz, 2H), 6.63 (d,  $J = 7.7$  Hz, 2H), 6.58 – 6.41 (m, 2H), 6.28 (t,  $J = 7.3$  Hz, 2H), 6.02 (d,  $J = 8.3$  Hz, 2H), 5.71 (d,  $J = 10.3$  Hz, 1H), 5.11 (s, 2H), 4.73 (t,  $J = 7.7$  Hz, 1H), 4.04 (p,  $J = 6.5$  Hz, 1H), 3.63 (s, 3H), 3.58 (d,  $J = 5.0$  Hz, 1H), 3.10 (d,  $J = 5.0$  Hz, 1H), 3.01 – 2.83 (m, 1H), 2.66 (t,  $J = 6.8$  Hz, 2H), 1.98 (q,  $J = 11.9$  Hz, 1H), 1.75 (d,  $J = 6.7$  Hz, 3H), 0.57 (d,  $J = 6.5$  Hz, 3H) ppm;  $^{13}\text{C}$  NMR (75 MHz,  $\text{CDCl}_3$ )  $\delta$  158.46, 146.97, 143.54, 138.29, 135.79, 135.76, 134.10, 134.03, 133.56, 133.15, 132.98, 131.94, 130.75, 130.08, 129.48, 127.79, 127.61, 127.33, 127.09, 126.59, 126.50, 126.42, 126.15, 126.06, 125.77, 125.01, 123.06, 113.40, 71.62, 69.02, 55.12, 52.15, 51.07, 43.72, 42.14, 39.88, 32.12, 28.06, 21.31 ppm; HRMS (ESI):  $\text{C}_{43}\text{H}_{39}\text{O}_3$   $[\text{M} + \text{H}]^+$  calcd: 603.2893, found: 603.2897.

*Procedure B:* To a solution of polycyclic diol **5** (0.074 mmol, 1.0 equiv) in ethyl acetate (1.0 mL) was added 10% palladium on carbon catalyst (0.015 mmol, 0.2 equiv) and the resulting reaction mixture was stirred at hydrogen atmosphere for 40 h until the complete consumption of the start material. Then the mixture was filtrated with celite and evaporated to give a residue, which was purified by silica gel column chromatography (eluting with hexane/ethyl acetate = 3:1 to 1:1) to afford polycyclic diol **6** in 75% yield. White solid, m.p. 127-128 °C; <sup>1</sup>H NMR (300 MHz, DMSO-*d*<sub>6</sub>) δ 8.23 (s, 1H), 7.21 (d, *J* = 7.8 Hz, 1H), 7.00 (dd, *J* = 18.9, 7.7 Hz, 2H), 6.80 (t, *J* = 7.5 Hz, 1H), 6.65 (t, *J* = 7.2 Hz, 1H), 6.55 (d, *J* = 7.3 Hz, 1H), 6.43 (t, *J* = 7.6 Hz, 2H), 6.34 – 6.07 (m, 4H), 5.65 (d, *J* = 7.5 Hz, 2H), 5.06 (d, *J* = 3.8 Hz, 1H), 4.53 (d, *J* = 4.5 Hz, 2H), 3.75 (s, 1H), 3.51 (q, *J* = 6.9, 6.2 Hz, 2H), 3.43 (s, 3H), 3.30 – 3.20 (m, 1H), 3.10 (dd, *J* = 11.9, 6.1 Hz, 1H), 2.88 (d, *J* = 12.5 Hz, 1H), 2.49 (d, *J* = 5.3 Hz, 1H), 2.35 (d, *J* = 13.2 Hz, 1H), 2.17 – 1.85 (m, 4H), 1.58 (t, *J* = 12.0 Hz, 3H), 1.43 (d, *J* = 12.1 Hz, 1H), 1.26 (d, *J* = 6.4 Hz, 3H), 0.86 – 0.64 (m, 2H), 0.44 (d, *J* = 6.6 Hz, 3H) ppm; <sup>13</sup>C NMR (75 MHz, DMSO) δ 156.90, 146.01, 142.08, 140.12, 138.61, 138.32, 136.40, 135.52, 134.31, 132.44, 130.39, 130.24, 130.04, 126.50, 125.45, 125.11, 124.49, 123.80, 123.22, 112.59, 79.65, 72.15, 69.60, 55.09, 51.40, 47.26, 43.24, 43.10, 41.51, 37.43, 31.31, 31.04, 29.40, 29.07, 27.61, 21.83 ppm; HRMS (ESI): C<sub>43</sub>H<sub>45</sub>O<sub>3</sub> [M + H]<sup>+</sup> calcd: 609.3362, found: 609.3374.

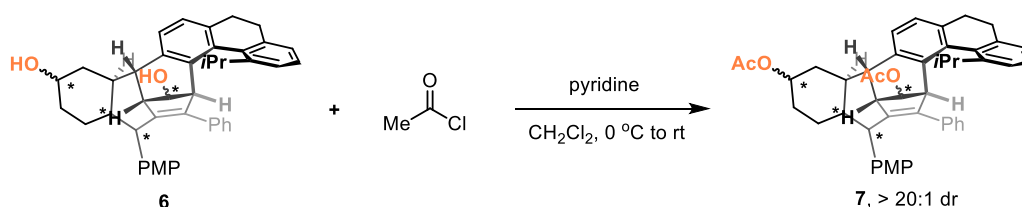

To a solution of polycyclic diol **6** (0.063 mmol, 1.0 equiv) and pyridine (0.38 mmol, 6.0 equiv) in DCM (1.0 mL) was added acetyl chloride (0.38 mmol, 6.0 equiv) at 0 °C. The reaction mixture was then stirred at room temperature for 2 days. After the complete conversion of diol **6**, the reaction mixture was concentrated under vacuo and the residue was purified by silica gel column chromatography (eluting with hexane/ethyl acetate = 30:1 to 15:1) to give diacetate **7** in 75% yield. <sup>1</sup>H NMR (300 MHz, Chloroform-*d*) δ 7.38 – 7.13 (m, 2H), 7.07 (d, *J* = 7.8 Hz, 1H), 6.95 (t, *J* = 7.5 Hz, 1H), 6.79 (t, *J* = 7.3 Hz, 1H), 6.73 – 6.51 (m, 3H), 6.36 (d, *J* = 8.2 Hz, 2H), 6.26 (d, *J* = 8.3 Hz, 2H), 5.77 (s, 2H), 5.62 (t, *J* = 4.9 Hz, 1H), 5.11 (td, *J* = 11.3, 10.7, 5.1 Hz, 1H), 3.77 (t, *J* = 5.6 Hz, 1H), 3.60 (s, 3H), 3.42 (td, *J* = 13.8, 12.9, 6.3 Hz, 2H), 3.31 – 3.15 (m, 2H), 3.15 – 2.92

(m, 2H), 2.59 – 2.13 (m, 4H), 2.11 (s, 3H), 2.03 (s, 3H), 1.92 – 1.55 (m, 5H), 1.29 (d,  $J = 6.8$  Hz, 3H), 0.67 (d,  $J = 6.6$  Hz, 3H) ppm;  $^{13}\text{C}$  NMR (75 MHz,  $\text{CDCl}_3$ )  $\delta$  171.13, 170.74, 157.12, 145.12, 142.43, 139.66, 138.41, 136.65, 135.62, 135.11, 133.68, 133.47, 131.97, 130.64, 130.00, 129.82, 126.68, 126.50, 125.36, 125.07, 124.91, 123.87, 122.68, 112.40, 74.57, 73.02, 54.95, 50.68, 45.17, 43.15, 42.75, 40.57, 40.18, 38.03, 33.04, 31.25, 30.96, 29.49, 29.02, 27.25, 21.44, 21.30, 21.25 ppm; **HRMS (ESI)**:  $\text{C}_{47}\text{H}_{48}\text{NaO}_5$   $[\text{M} + \text{Na}]^+$  calcd: 715.3394, found: 715.3373.

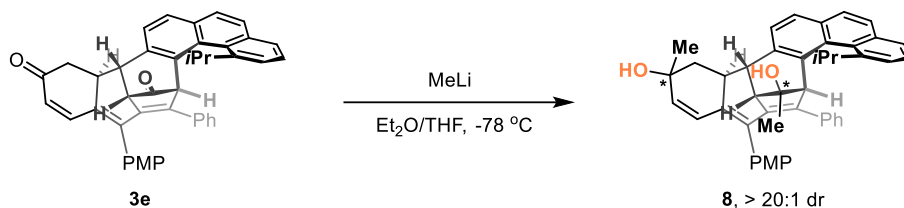

A solution of 1.3 M MeLi (0.4 mmol, 0.31 mL) in ether was added dropwise to a stirred solution of **3e** (0.1 mmol, 1.0 equiv) in a mixed solution of  $\text{Et}_2\text{O}$  (1.0 mL) and THF (0.5 mL) at  $-78\text{ }^\circ\text{C}$  under Ar. After stirred for 1 h at the same temperature, the reaction mixture was quenched by saturated  $\text{NH}_4\text{Cl}$  aqueous solution. The aqueous layer was extracted with EtOAc for three times, and the combined organic layers were washed with brine, dried, and concentrated. The resulting residue was then purified by silica gel column chromatography (eluting with hexane/ethyl acetate = 4:1 to 3:1) to give dimethylated **8** in 79% yield. White solid, m.p.  $127\text{--}128\text{ }^\circ\text{C}$ ;  $^1\text{H}$  NMR (300 MHz, Chloroform- $d$ )  $\delta$  7.62 (d,  $J = 8.2$  Hz, 1H), 7.57 – 7.34 (m, 4H), 7.16 (t,  $J = 6.6$  Hz, 2H), 6.97 (d,  $J = 8.3$  Hz, 2H), 6.63 (d,  $J = 8.3$  Hz, 2H), 6.56 – 6.40 (m, 2H), 6.29 (t,  $J = 7.6$  Hz, 2H), 6.03 (d,  $J = 7.7$  Hz, 2H), 5.63 (d,  $J = 10.2$  Hz, 1H), 4.96 (s, 1H), 4.13 (p,  $J = 6.6$  Hz, 1H), 3.64 (s, 4H), 3.06 – 2.78 (m, 2H), 2.63 (s, 1H), 2.44 (dd,  $J = 12.1, 3.7$  Hz, 1H), 2.15 (t,  $J = 13.2$  Hz, 1H), 1.95 (s, 4H), 1.75 (d,  $J = 6.6$  Hz, 3H), 1.56 (s, 3H), 0.51 (d,  $J = 6.5$  Hz, 3H) ppm;  $^{13}\text{C}$  NMR (75 MHz,  $\text{CDCl}_3$ )  $\delta$  158.44, 146.89, 144.56, 138.17, 136.47, 135.81, 135.72, 135.57, 134.10, 133.88, 133.12, 131.91, 130.63, 129.85, 129.36, 127.77, 127.67, 127.12, 126.73, 126.42, 126.07, 125.65, 125.21, 125.03, 122.48, 113.38, 71.39, 58.13, 57.13, 55.11, 47.94, 44.04, 41.43, 32.01, 27.77, 27.34, 25.47, 21.76 ppm; **HRMS (ESI)**:  $\text{C}_{45}\text{H}_{42}\text{NaO}_3$   $[\text{M} + \text{Na}]^+$  calcd: 653.3026, found: 653.3009.

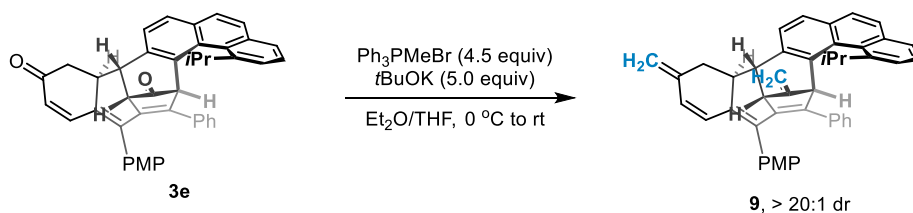

Potassium *tert*-butanolate (0.5 mmol, 5.0 equiv) was added to a solution of methyltriphenylphosphonium bromide (0.45 mmol, 4.5 equiv) in Et<sub>2</sub>O (1.0 mL) under Ar and the resulting mixture was stirred at 0 °C for 1 h. Subsequently, a solution of **3e** (0.1 mmol, 1.0 equiv) in THF (1.0 mL) was added dropwise to the reaction mixture, which was then stirred for 5 days at room temperature. Then the reaction mixture was quenched by saturated NH<sub>4</sub>Cl aqueous solution. The aqueous layer was extracted with EtOAc for three times, and the combined organic layers were washed with brine, dried, and concentrated. The resulting residue was then purified by silica gel column chromatography (eluting with hexane/ethyl acetate = 200:1) to give **9** in 66% yield. White solid, m.p. 160-161 °C; <sup>1</sup>H NMR (300 MHz, Chloroform-*d*) δ 7.64 – 7.34 (m, 5H), 7.13 (q, *J* = 8.5 Hz, 2H), 6.99 (d, *J* = 8.3 Hz, 2H), 6.70 – 6.44 (m, 4H), 6.30 (t, *J* = 7.6 Hz, 2H), 6.12 (d, *J* = 9.9 Hz, 1H), 5.98 (d, *J* = 7.7 Hz, 2H), 5.37 (s, 1H), 5.28 (s, 1H), 5.17 (s, 1H), 5.01 (d, *J* = 4.7 Hz, 2H), 4.11 (dq, *J* = 14.2, 7.0 Hz, 1H), 3.61 (s, 5H), 3.10 – 2.72 (m, 3H), 1.72 (d, *J* = 6.7 Hz, 3H), 0.44 (d, *J* = 6.5 Hz, 3H) ppm; <sup>13</sup>C NMR (75 MHz, CDCl<sub>3</sub>) δ 158.35, 153.21, 145.88, 145.81, 143.63, 138.86, 137.95, 137.15, 135.97, 134.26, 134.03, 133.07, 131.13, 130.97, 129.99, 128.69, 128.49, 127.96, 127.70, 127.47, 127.35, 126.34, 126.30, 126.02, 125.96, 125.78, 125.57, 124.98, 121.64, 113.20, 112.48, 99.88, 55.08, 54.69, 54.12, 47.14, 44.68, 39.60, 31.93, 27.45, 21.80 ppm; **HRMS (ESI)**: C<sub>45</sub>H<sub>38</sub>NaO [M + Na]<sup>+</sup> calcd: 617.2815, found: 617.2814.

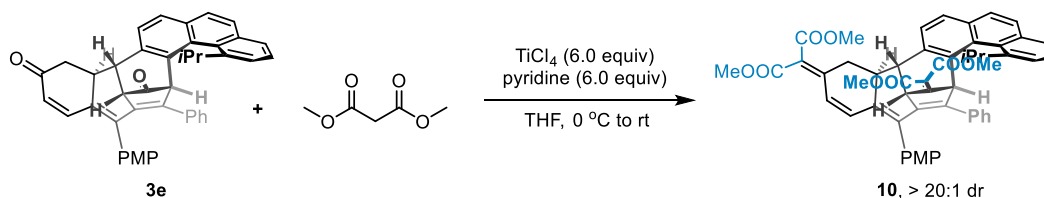

A solution of TiCl<sub>4</sub> (0.6 mmol, 6.0 equiv) in DCM (0.6 mL) was added dropwise to a stirred solution of polycyclic diketone **3e** (0.1 mmol, 1.0 equiv), dimethyl malonate (0.2 mmol, 2.0 equiv) and pyridine (0.6 mmol, 6.0 equiv) in THF (0.4 mL) at 0 °C. The resulting reaction mixture was stirred at room temperature for 16 h, the process of which was monitored TLC. Then the reaction mixture was quenched by water. The aqueous layer was extracted with EtOAc for three times, and the combined organic layers were washed with brine, dried, and concentrated. The resulting residue was then purified by silica gel column chromatography (eluting with hexane/ethyl acetate = 20:1 to 10:1) to give the desired product **10** in 42% yield. Yellow solid, m.p. 251-252 °C; <sup>1</sup>H NMR (300 MHz, Chloroform-*d*) δ 7.57 (d, *J* = 8.1 Hz, 1H), 7.50 – 7.22 (m, 5H), 7.02 (q, *J* = 8.8 Hz, 3H), 6.92 (d, *J* = 8.2 Hz, 2H), 6.66 (d, *J* = 10.2 Hz, 1H), 6.54 (dd, *J* = 15.6, 7.8 Hz, 3H), 6.35

(t,  $J = 7.5$  Hz, 2H), 6.04 (s, 1H), 5.89 (d,  $J = 7.6$  Hz, 2H), 3.99 (s, 3H), 3.97 (s, 3H), 3.89 (s, 3H), 3.82 (d,  $J = 6.2$  Hz, 4H), 3.64 (d,  $J = 4.6$  Hz, 1H), 3.59 (s, 4H), 3.46 (q,  $J = 4.7, 2.9$  Hz, 1H), 3.32 (dd,  $J = 14.8, 4.3$  Hz, 1H), 2.85 (t,  $J = 15.3$  Hz, 1H), 1.28 (d,  $J = 8.3$  Hz, 3H), 0.15 (d,  $J = 6.3$  Hz, 3H) ppm;  $^{13}\text{C}$  NMR (75 MHz,  $\text{CDCl}_3$ )  $\delta$  166.66, 166.26, 166.07, 166.01, 164.41, 159.05, 151.20, 149.02, 144.60, 140.10, 136.85, 136.64, 136.49, 133.89, 133.65, 133.37, 131.50, 131.14, 130.57, 129.45, 128.30, 128.13, 127.72, 127.43, 126.75, 126.54, 126.38, 126.30, 126.14, 124.41, 124.28, 123.96, 121.55, 121.02, 116.86, 113.27, 55.07, 54.78, 53.84, 52.49, 52.36, 45.17, 43.89, 35.45, 31.11, 25.19, 20.80 ppm; HRMS (ESI):  $\text{C}_{53}\text{H}_{47}\text{O}_9$   $[\text{M} + \text{H}]^+$  calcd: 827.3214, found: 827.3202.

## 8. Control Experiments

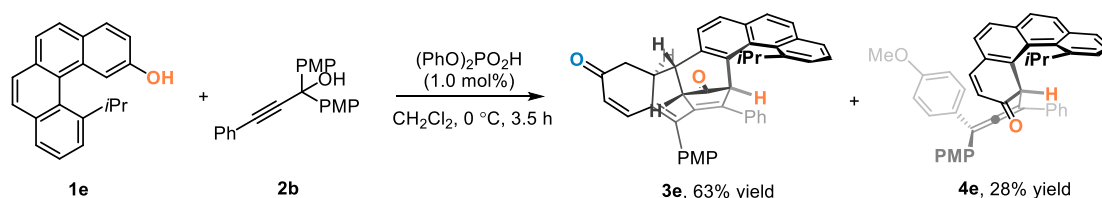

To a solution of 2-[4]helicenol **1e** (0.2 mmol) and propargylic alcohol **2b** (0.24 mmol) in DCM (2.0 mL) was added diphenyl phosphate (0.002 mmol) at  $0\text{ }^\circ\text{C}$ . After stirred at the same temperature for 3.5 h, the resulting reaction mixture was directly purified by silica gel column chromatography (eluting with hexane/ethyl acetate = 20:1 to 10:1 to 4:1) to give the double dearomatization product **3e** and allene intermediate **4e** in 63% and 28% yield, respectively.

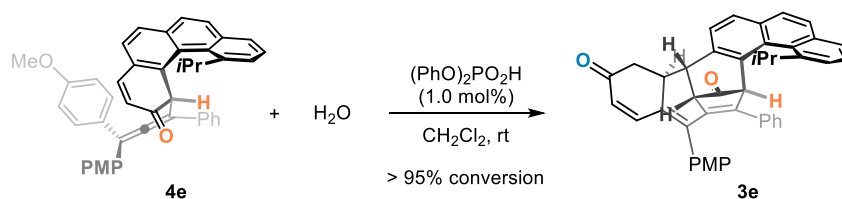

To a solution of **4e** (0.028 mmol) and diphenyl phosphate (0.00028 mmol) in DCM (0.28 mL) was added water (0.028 mmol). When the resulting reaction mixture was stirred at room temperature for 6 h, a complete conversion of **4e** to **3e** was observed by NMR analysis.

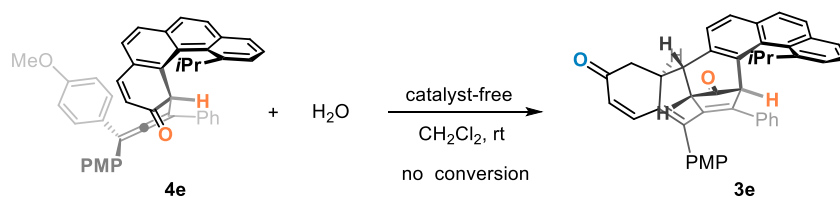

When the solution of **4e** (0.028 mmol) and water (0.028 mmol) in DCM was stirred at room

temperature for 24 h, there was no formation of **3e** was detected. Which indicated that diphenyl phosphate plays an indispensable role in the intramolecular dearomative Diels-Alder reaction/dearomative polyene cyclization and subsequent formal demethylation sequence.

## 9. The Computed Reaction Free Energy Profiles for the Dearomatization and [3+3] Cycloaddition Pathways

### 9.1 Computational details

All theoretical calculations were performed using Gaussian 16 C.01 software package.<sup>[3]</sup> Geometry optimizations, vibrational frequency calculations and intrinsic reaction coordinate (IRC)<sup>[4,5]</sup> calculations were carried out at M06-2X<sup>[6]</sup>-D3<sup>[7]</sup>/Def2-SVP<sup>[8]</sup>/SMD(CH<sub>2</sub>Cl<sub>2</sub>)<sup>[9]</sup> level of theory. All optimized structures of reactants, catalyst, intermediates (denoted as **Ints**), and products have no imaginary frequency, while each optimized transition state (denoted as **TS**) structure has only one imaginary frequency. The optimized structures were drawn using CYLview software.<sup>[10]</sup>

### 9.2 Possible reaction pathways

We proposed three possible reaction pathways, denoted as **path a**, **b** and **c**. **Path a** will lead to dearomatized product **3e**, while **path b** and **path c** will lead to [3+3] cyclization product **3e'**. **Int 1** exists in two possible conformations, denoted as **Int 1<sub>C1</sub>** and **Int 1<sub>C2</sub>**. Notably, **Int 1<sub>C2</sub>** has a higher Gibbs free energy than **Int 1<sub>C1</sub>** by 2.7 kcal/mol. The optimized structures of **Int 1<sub>C1</sub>**, **Int 1<sub>C2</sub>**, **3e**, **3e'**, diphenyl phosphorous acid (**DPA**) and corresponding anion (**DPA-anion**), H<sub>2</sub>O and MeOH were displayed in **Figure S2**.

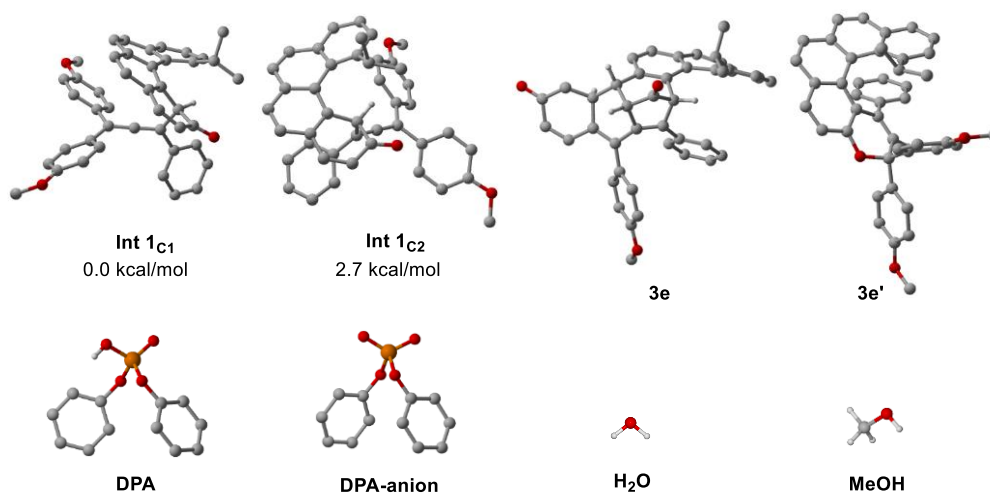

**Figure S2.** Optimized structures of **Int 1<sub>C1</sub>**, **Int 1<sub>C2</sub>**, **3e**, **3e'**, diphenyl phosphorous acid (**DPA**) and corresponding anion (**DPA-anion**), H<sub>2</sub>O and MeOH, and relative Gibbs free energies of **Int 1<sub>C1</sub>** and **Int 1<sub>C2</sub>**. Some H atoms are omitted for clarity.



### 9.2.1 Relative free energy profile of path a

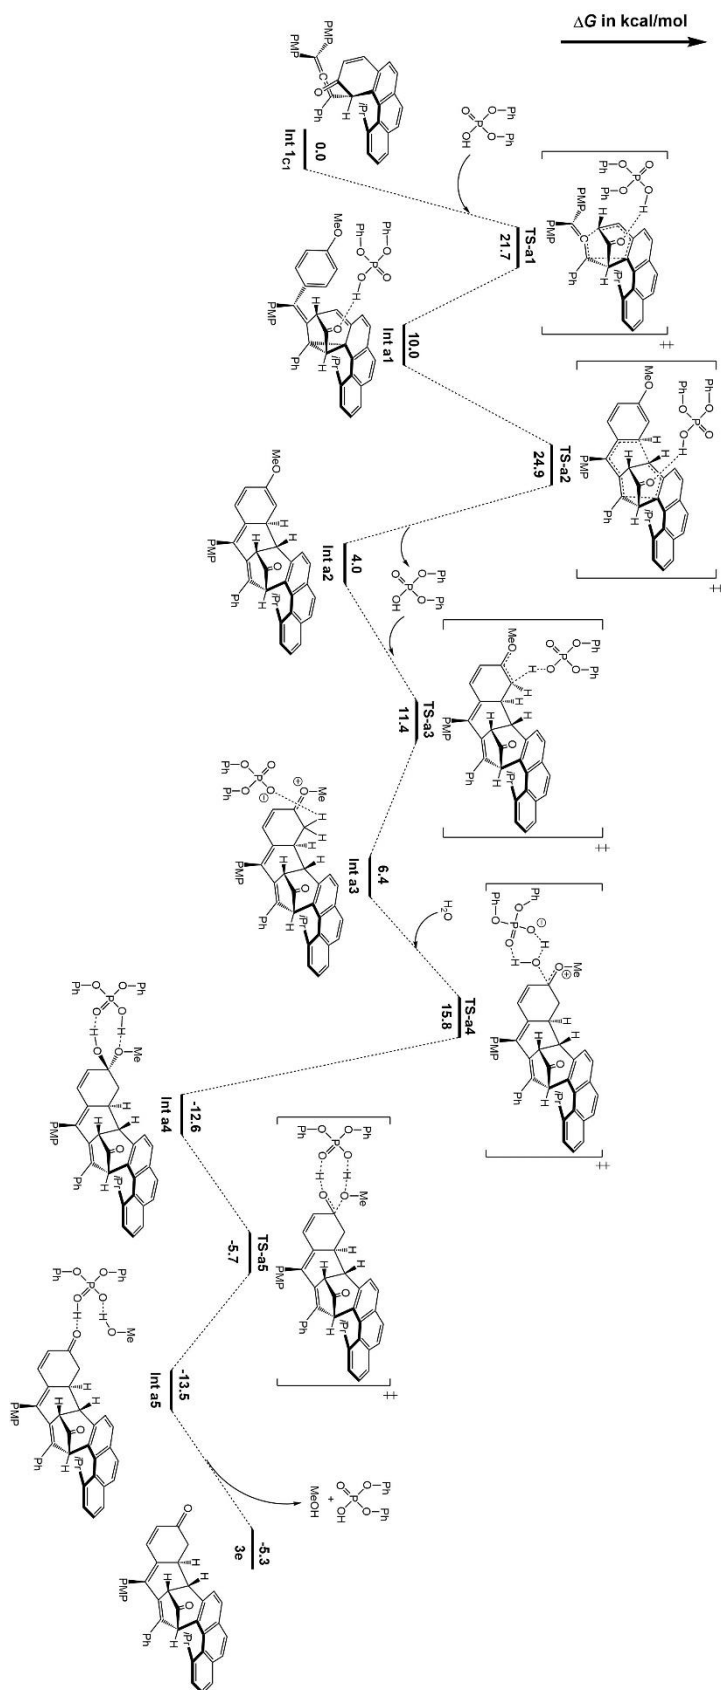

**Figure S3.** Potential free energy diagram of **path a**. Some intra- and intermolecular interactions were omitted. The Gibbs free energy of **Int 1c1** and **DPA** were set to 0.0 kcal/mol as reference.

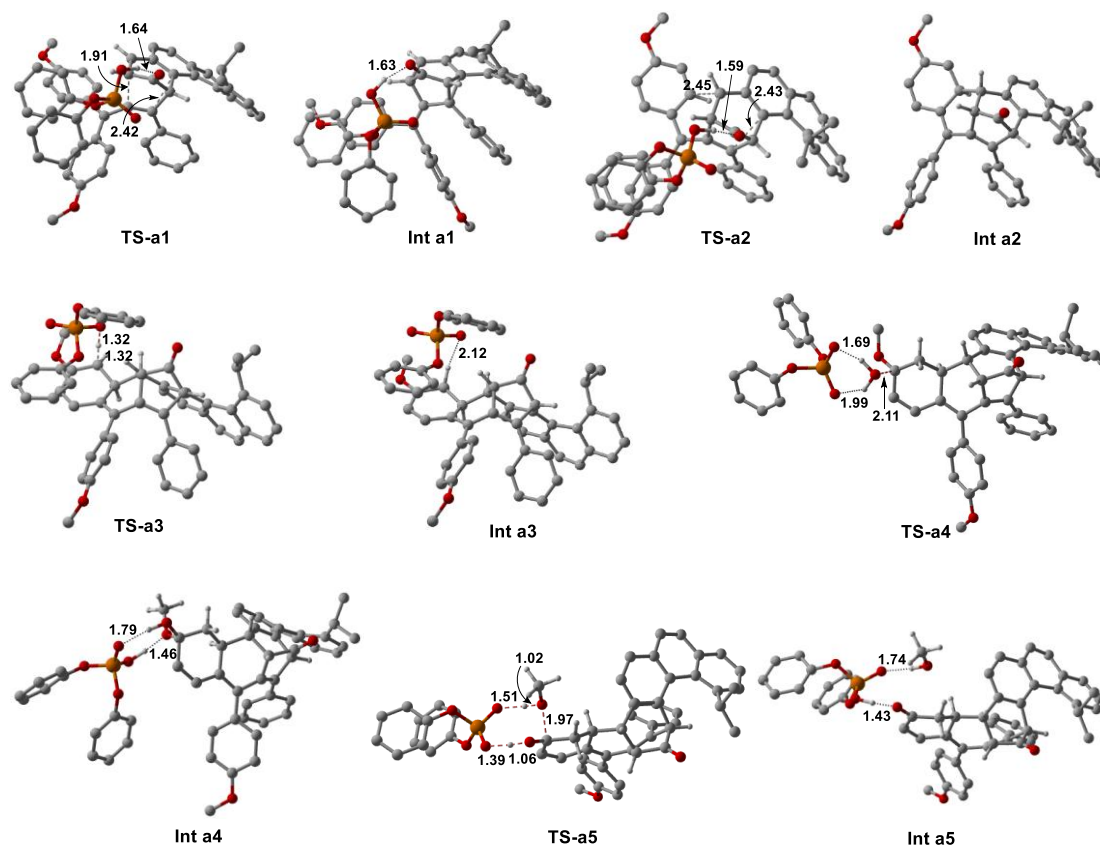

**Figure S4.** Optimized structures of **path a**. Some H atoms and intermolecular interactions are omitted for clarity. Distances are in Å.

Starting from **Int 1<sub>C1</sub>**, an intramolecular Diels-Alder reaction occurred with the assistance of **DPA**. The reaction journeyed through transition state **TS-a1** to generate intermediate **Int a1**, in which the naphthalen-2(1*H*)-one moiety acts as the diene, while the C=C bond of the allene serves as the dienophile. This reaction unfolded in a concerted but asynchronous manner, necessitating a free energy uphill of 21.7 kcal/mol from the reactant to transition state **TS-a1**. Subsequently, a polyene cyclization reaction took place via **TS-a2** to generate **Int a2**, and the **DPA** was temporarily detached. From **Int a1** to **TS-a2**, there is a 14.9 kcal/mol free energy barrier. Next, **Int a2** was acidified by **DPA** via **TS-a3** to form ion-pair **Int a3**. From **Int a2** to **TS-a3**, a 7.4 kcal/mol activation free energy is needed. Afterwards hydrolysis reaction occurred via **TS-a4** to generate hemiketal **Int a4**. In **Int a3**→**TS-a4** procedure, there is a rise in the Gibbs free energy by 9.4 kcal/mol. Following this, in the **TS-a4** to **Int a4** transition, there is an irreversible release of Gibbs free energy, amounting to 28.4 kcal/mol. Then, the hemiketal decomposition reaction took place via **TS-a5** to produce hydrogen-bond complex **Int a5**, with a mere energy input of 6.9 kcal/mol being necessary for the process. Finally, **3e** and by-product **MeOH** were released with 8.2 kcal/mol free energy uphill, and **DPA** will join another catalytic cycle. The potential free energy

diagram and the optimized structures of **path a** are shown in **Figures S3** and **S4**, respectively.

### 9.2.2 Relative free energy profile of **path b**

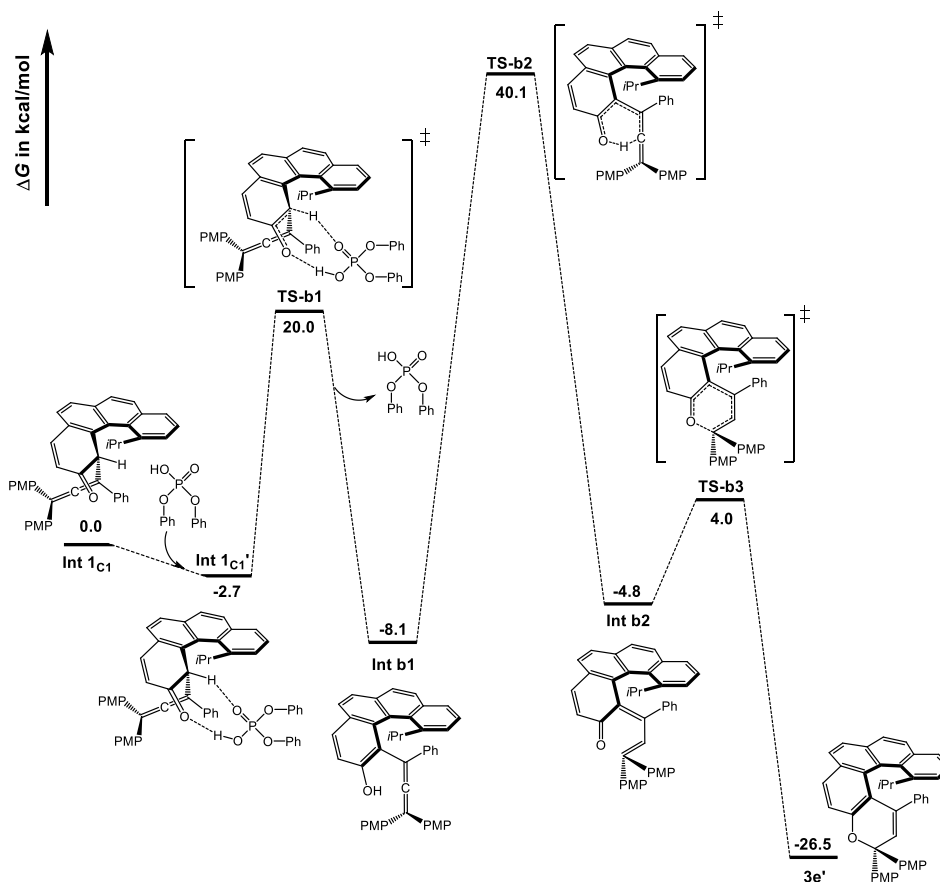

**Figure S5.** Potential free energy diagram of **path b**. Some intra- and intermolecular interactions were omitted. The Gibbs free energies of **Int 1<sub>c1</sub>** and **DPA** were set to 0.0 kcal/mol as reference.

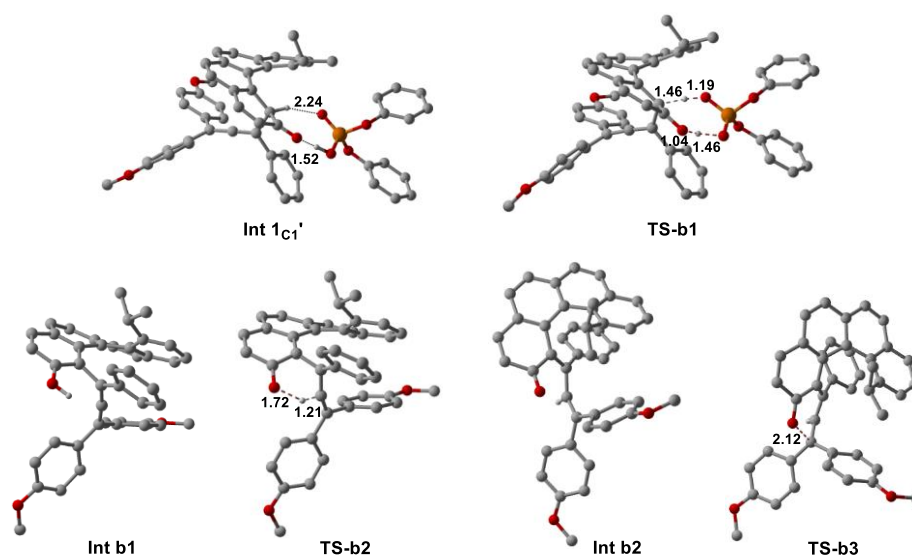

**Figure S6.** Optimized structures of **path b**. Some H atoms and intermolecular interactions are omitted for clarity. Distances are in Å.

In pathway b, initially, **DPA** interacted with **Int 1<sub>C1</sub>** via hydrogen bonds, leading to the formation of **Int 1<sub>C1</sub>'** and resulting in a free energy release of 2.7 kcal/mol. Afterwards **Int 1<sub>C1</sub>** and **DPA** exchanged their protons via **TS-b1** to generate **Int b1**, which has larger  $\pi$ -conjugated system than **Int 1<sub>C1</sub>**. From **Int 1<sub>C1</sub>'** to **TS-b1**, a 22.7 kcal/mol free energy barrier should be overcome. The **TS-b1**→**Int b1** procedure is 28.1 kcal/mol exothermic, and **DPA** was released to join another catalytic cycle. Next, the intramolecular proton transfer between phenol moiety and allene moiety took place via 6-membered ring transition state **TS-b2** to form **Int b2**. From **Int b1** to **TS-b2**, the activation free energy is 48.2 kcal/mol, which is too high to overcome. Finally, **Int b2** went through an intramolecular oxa-6 $\pi$  electrocyclization via **TS-b3** to produce **3e'** with only 8.8 kcal/mol free energy barrier. The potential free energy diagram and the optimized structures of **path b** are shown in **Figures S5** and **S6**, respectively.

### 9.2.3 Relative free energy profile of path c

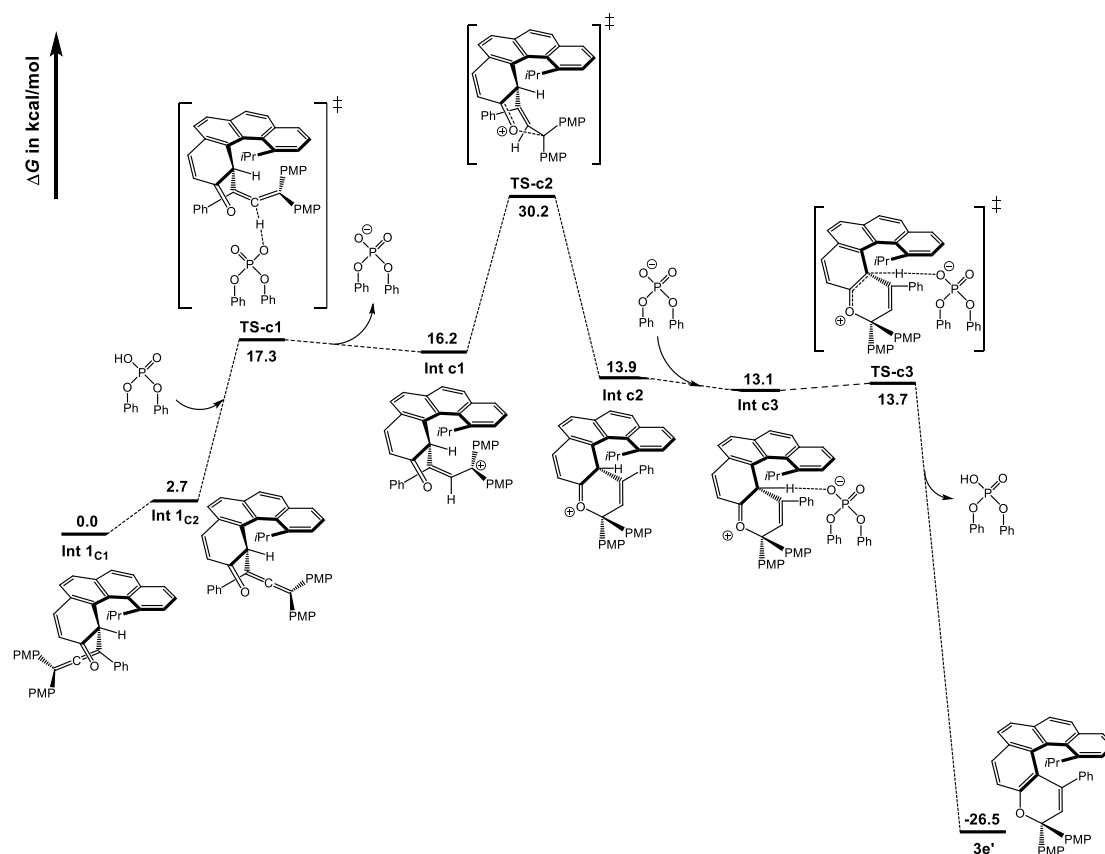

**Figure S7.** Potential free energy diagram of **path b**. Some intra- and intermolecular interactions were omitted. The Gibbs free energies of **A<sub>C1</sub>** and **DPA** were set to 0.0 kcal/mol as reference.

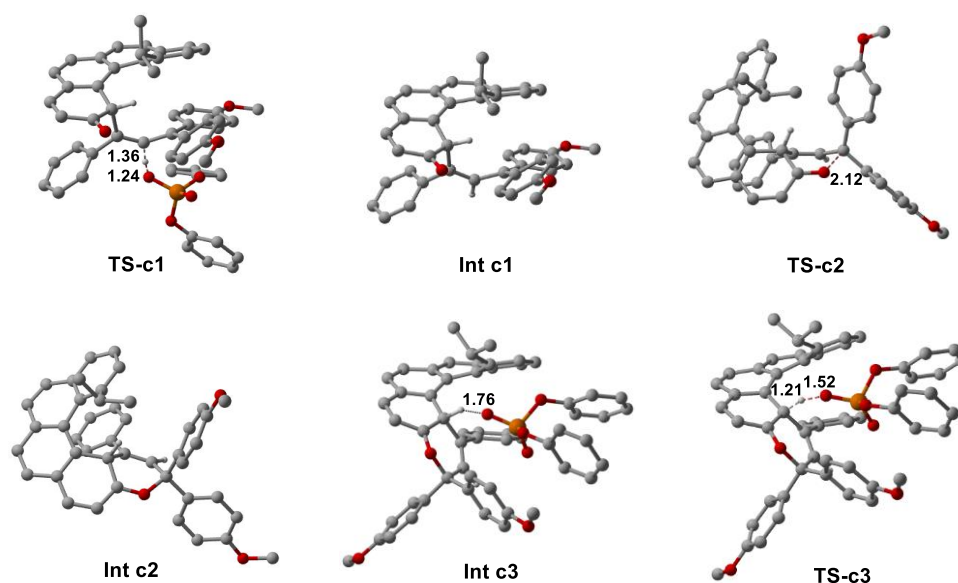

**Figure S8.** Optimized structures of **path c**. Some H atoms and intermolecular interactions are omitted for clarity. Distances are in Å.

In **path c**, **Int 1<sub>C1</sub>** firstly changed its conformation to **Int 1<sub>C2</sub>** with 2.7 kcal/mol free energy rise. Then intermolecular proton-transfer reaction between **DPA** and central C atom of allene occurred via **TS-c1** to form **Int c1** and **DPA-anion**. From **Int 1<sub>C2</sub>** to **TS-c1**, a 14.6 kcal/mol free energy uphill is required. Afterwards the O atom of ketene moiety attacked carbocation via **TS-c2** with boat-conformation to generate **Int c2**. The **Int c1**→**TS-c2** procedure needed 14.0 kcal/mol activation free energy. Subsequently, **Int c2** combined with **DPA-anion** to form ion-pair **Int c3** with 0.8 kcal/mol free energy release. Finally, the proton transfer reaction took place via **TS-c3** to generate **DPA** and **3e'**. From **Int c3** to **TS-c3**, there is only 0.6 kcal/mol free energy barrier. The potential free energy diagram and the optimized structures of **path b** are shown in **Figures S7** and **S8**, respectively.

#### 9.2.4 Conclusions

According to Murdoch's study,<sup>[11]</sup> the calculated activation Gibbs free energies of the three reaction pathways are as follows:  $\Delta G_{\text{act}}(\text{path a}) = G(\text{TS-a2}) - G(\text{Int 1}_{\text{C1}}) = 24.9$  kcal/mol,  $\Delta G_{\text{act}}(\text{path b}) = G(\text{TS-b2}) - G(\text{Int b1}) = 48.2$  kcal/mol,  $\Delta G_{\text{act}}(\text{path c}) = G(\text{TS-c2}) - G(\text{Int 1}_{\text{C1}}) = 30.2$  kcal/mol. **path a** is less exothermic, but it has the lowest activation Gibbs free energy among three pathways, therefore **3e** is the main product.

#### 9.3 Calculated Original Data

**Table S1.** Calculated Gibbs free energies (denoted as  $G_s$ , in a.u.) of all optimized structures, and imaginary frequencies (denoted as  $\nu_{i,s}$ , in  $\text{cm}^{-1}$ ) of all transition state structures.

|                       | <i>G</i>     | <i>v<sub>i</sub></i> |                 | <i>G</i>     | <i>v<sub>i</sub></i> |
|-----------------------|--------------|----------------------|-----------------|--------------|----------------------|
| <b>Int 1c1</b>        | -1921.234225 |                      | <b>Int a4</b>   | -3102.678132 |                      |
| <b>Int 1c2</b>        | -1921.229931 |                      | <b>TS-a5</b>    | -3102.667042 | -230.7               |
| <b>3e</b>             | -1882.021947 |                      | <b>Int a5</b>   | -3102.679615 |                      |
| <b>3e'</b>            | -1921.276505 |                      | <b>Int 1c1'</b> | -3026.335873 |                      |
| <b>DPA</b>            | -1105.097413 |                      | <b>TS-b1</b>    | -3026.299813 | -1312.0              |
| <b>DPA-anion</b>      | -1104.645771 |                      | <b>Int b1</b>   | -1921.247135 |                      |
| <b>H<sub>2</sub>O</b> | -76.326399   |                      | <b>TS-b2</b>    | -1921.170271 | -500.9               |
| <b>MeOH</b>           | -115.547081  |                      | <b>Int b2</b>   | -1921.241795 |                      |
| <b>TS-a1</b>          | -3026.297026 | -412.8               | <b>TS-b3</b>    | -1921.227787 | -354.7               |
| <b>Int a1</b>         | -3026.315723 |                      | <b>TS-c1</b>    | -3026.304053 | -1392.6              |
| <b>TS-a2</b>          | -3026.291884 | -194.6               | <b>Int c1</b>   | -1921.660045 |                      |
| <b>Int a2</b>         | -1921.227788 |                      | <b>TS-c2</b>    | -1921.637773 | -224.2               |
| <b>TS-a3</b>          | -3026.313514 | -1261.8              | <b>Int c2</b>   | -1921.663791 |                      |
| <b>Int a3</b>         | -3026.321425 |                      | <b>Int c3</b>   | -3026.310732 |                      |
| <b>TS-a4</b>          | -3102.632797 | -230.1               | <b>TS-c3</b>    | -3026.309812 | -175.4               |

## 9.4 Cartesian Coordinates

### Int 1c1

|   |             |             |             |
|---|-------------|-------------|-------------|
| C | -4.67974100 | 1.64103400  | 0.74537100  |
| C | -3.71984500 | 2.51323900  | 0.27662400  |
| C | -2.71726600 | 2.05452700  | -0.60525600 |
| C | -2.63614300 | 0.67461100  | -0.94313800 |
| C | -3.75457600 | -0.16200900 | -0.62783800 |
| C | -4.72191700 | 0.32982600  | 0.24272700  |
| C | -1.84435500 | 3.00264200  | -1.25347700 |
| C | -1.45153100 | 0.23716600  | -1.68885800 |
| C | -0.72005400 | 1.20395500  | -2.43196700 |
| C | -0.96676900 | 2.60467300  | -2.20742600 |
| C | 0.32591700  | 0.79561000  | -3.29262000 |
| H | 0.84775900  | 1.55322000  | -3.88060300 |
| C | 0.69080400  | -0.52913500 | -3.36818400 |
| C | 0.11163700  | -1.46466900 | -2.48153600 |
| C | -0.90581000 | -1.07118600 | -1.60705500 |
| H | -1.96019800 | 4.06067500  | -1.00656800 |
| H | -5.45032600 | 1.98316600  | 1.43810300  |
| H | -3.73606500 | 3.56985200  | 0.55233300  |
| H | -5.57599600 | -0.30055700 | 0.49833600  |
| H | -0.36773100 | 3.33124900  | -2.76015700 |
| H | 1.47898700  | -0.85620700 | -4.04924800 |
| C | -4.08119100 | -1.43913100 | -1.40718900 |
| C | -5.09258200 | -1.07784000 | -2.50464800 |
| C | -4.61869200 | -2.59143500 | -0.55555600 |

|   |             |             |             |
|---|-------------|-------------|-------------|
| H | -3.17922100 | -1.78951700 | -1.92329500 |
| H | -4.70930000 | -0.27332800 | -3.14956600 |
| H | -5.30096700 | -1.95541300 | -3.13527400 |
| H | -6.04258700 | -0.73849800 | -2.06352400 |
| H | -3.91625100 | -2.90192000 | 0.23206100  |
| H | -5.57608600 | -2.33086400 | -0.08035500 |
| H | -4.80050000 | -3.46790400 | -1.19506600 |
| C | 0.60969500  | -2.84065100 | -2.44942400 |
| C | 0.15119200  | -3.77708100 | -1.59573100 |
| H | 1.37652200  | -3.10158500 | -3.18429800 |
| H | 0.49398400  | -4.81252700 | -1.62615000 |
| C | -1.17148200 | -1.95257700 | -0.40901600 |
| H | -2.19366100 | -1.87339800 | -0.03943500 |
| C | -0.89906300 | -3.43837400 | -0.62169800 |
| O | -1.48644000 | -4.27773500 | 0.02832500  |
| C | -0.26850900 | -1.49387000 | 0.75836500  |
| C | -0.53531400 | -2.05831400 | 2.11551900  |
| C | -1.84354500 | -2.23654600 | 2.58785700  |
| C | 0.53743200  | -2.38937400 | 2.95592300  |
| C | -2.06947200 | -2.72428800 | 3.87403700  |
| H | -2.69698300 | -1.97535500 | 1.95930600  |
| C | 0.30941800  | -2.87891700 | 4.24060600  |
| H | 1.55847500  | -2.26664900 | 2.58768600  |
| C | -0.99568300 | -3.04880000 | 4.70408900  |
| H | -3.09373400 | -2.84950700 | 4.22958400  |
| H | 1.15656300  | -3.13469600 | 4.87952600  |
| H | -1.17592100 | -3.43554500 | 5.70860900  |
| C | 1.63473900  | 0.30669400  | 0.45459800  |
| C | 3.04248400  | -0.07282100 | 0.13681800  |
| C | 4.12415300  | 0.69674000  | 0.57742800  |
| C | 3.32414900  | -1.25177800 | -0.57676900 |
| C | 5.44394200  | 0.32134700  | 0.31715300  |
| H | 3.94456900  | 1.60832200  | 1.15005100  |
| C | 4.62764800  | -1.63832000 | -0.84230800 |
| H | 2.49666000  | -1.87043000 | -0.92942100 |
| C | 5.70388000  | -0.85141200 | -0.40063200 |
| H | 6.25679900  | 0.94796000  | 0.68209200  |
| H | 4.84407600  | -2.55011100 | -1.40102200 |
| C | 1.26143500  | 1.74190800  | 0.63914400  |
| C | 0.28099800  | 2.11281600  | 1.56433700  |
| C | 1.85490000  | 2.75508300  | -0.13497600 |
| C | -0.10747500 | 3.44342900  | 1.72699700  |
| H | -0.19016600 | 1.34347000  | 2.18074900  |
| C | 1.47988600  | 4.08189400  | 0.01553000  |

|   |             |             |             |
|---|-------------|-------------|-------------|
| H | 2.61357500  | 2.49652300  | -0.87653300 |
| C | 0.49129000  | 4.43863200  | 0.94583100  |
| H | -0.87456500 | 3.68753700  | 2.46110100  |
| H | 1.93218900  | 4.86877600  | -0.59009900 |
| O | 6.93848700  | -1.29434300 | -0.70937900 |
| O | 0.17736200  | 5.74854700  | 1.01585900  |
| C | 8.04800700  | -0.53159900 | -0.29184900 |
| H | 8.08914600  | -0.44883100 | 0.80610900  |
| H | 8.94137600  | -1.05871200 | -0.64548800 |
| H | 8.02866900  | 0.47947500  | -0.72963200 |
| C | -0.80109300 | 6.15441400  | 1.94539200  |
| H | -0.89727500 | 7.24150600  | 1.84509700  |
| H | -1.77637800 | 5.68601700  | 1.73497000  |
| H | -0.50108700 | 5.91193400  | 2.97754000  |
| C | 0.70189700  | -0.62175600 | 0.58347700  |

**Int 1c2**

|   |             |             |             |
|---|-------------|-------------|-------------|
| C | -1.84199100 | 3.67863200  | 1.65352100  |
| C | -2.63571300 | 3.57385500  | 0.52995600  |
| C | -3.14728900 | 2.31777800  | 0.14011400  |
| C | -2.78010800 | 1.13781800  | 0.84953400  |
| C | -2.12282000 | 1.28969600  | 2.11224500  |
| C | -1.63740000 | 2.54747500  | 2.45823900  |
| C | -4.14700600 | 2.25026500  | -0.89831400 |
| C | -3.21708900 | -0.14431800 | 0.28352700  |
| C | -4.33111700 | -0.15121200 | -0.60197100 |
| C | -4.79042500 | 1.08862900  | -1.17234300 |
| C | -4.90222000 | -1.37675000 | -1.01619600 |
| H | -5.78003900 | -1.35368200 | -1.66484600 |
| C | -4.34813700 | -2.57357000 | -0.62274900 |
| C | -3.12194600 | -2.57677700 | 0.07738600  |
| C | -2.52623600 | -1.37101100 | 0.46617000  |
| H | -4.42975100 | 3.17937300  | -1.39757400 |
| H | -1.43128400 | 4.64338900  | 1.95625500  |
| H | -2.90563000 | 4.45644500  | -0.05391500 |
| H | -1.12589000 | 2.67244200  | 3.41459200  |
| H | -5.61557200 | 1.05492300  | -1.88658700 |
| H | -4.80278300 | -3.52395600 | -0.90902100 |
| C | -2.15120100 | 0.22564900  | 3.21212200  |
| C | -3.27405800 | 0.57975400  | 4.19724500  |
| C | -0.82508600 | 0.06014600  | 3.95992300  |
| H | -2.42237100 | -0.74254300 | 2.77583700  |
| H | -4.24291000 | 0.66270900  | 3.68280600  |
| H | -3.36067400 | -0.19773400 | 4.97147400  |
| H | -3.06882000 | 1.53937700  | 4.69624600  |



|   |             |             |             |
|---|-------------|-------------|-------------|
| H | 0.02170700  | -0.14075600 | 3.28659100  |
| H | -0.58362300 | 0.95731900  | 4.54914000  |
| H | -0.89790700 | -0.78247700 | 4.66341200  |
| C | -2.46407200 | -3.84627000 | 0.38766100  |
| C | -1.27950700 | -3.93660200 | 1.02470700  |
| H | -3.00216800 | -4.75634700 | 0.10831700  |
| H | -0.83931300 | -4.89553900 | 1.30342600  |
| C | -1.05578000 | -1.40490500 | 0.80930300  |
| H | -0.75232700 | -0.61912400 | 1.49835200  |
| C | -0.54432100 | -2.71912200 | 1.39703700  |
| O | 0.45887000  | -2.73571700 | 2.07904000  |
| C | -0.22822400 | -1.15292400 | -0.47762500 |
| C | -0.66211300 | -1.76626200 | -1.77390400 |
| C | -0.24072400 | -3.04946500 | -2.14084900 |
| C | -1.52451100 | -1.05859900 | -2.62173700 |
| C | -0.68739900 | -3.62285500 | -3.33232500 |
| H | 0.43432800  | -3.60188300 | -1.48276800 |
| C | -1.97209900 | -1.63379800 | -3.81010900 |
| H | -1.84495900 | -0.05238100 | -2.34045400 |
| C | -1.55839300 | -2.91928100 | -4.16462600 |
| H | -0.35347000 | -4.62416900 | -3.61015400 |
| H | -2.64603400 | -1.07458900 | -4.46178600 |
| H | -1.91037100 | -3.37039600 | -5.09408300 |
| C | 1.97392100  | 0.28129000  | -0.31426000 |
| C | 1.97388100  | 1.75096300  | -0.56133000 |
| C | 3.12149600  | 2.40158000  | -1.02587100 |
| C | 0.80579200  | 2.51708800  | -0.39130800 |
| C | 3.12345600  | 3.76708800  | -1.31913900 |
| H | 4.04112000  | 1.83450200  | -1.18023600 |
| C | 0.79302100  | 3.87178900  | -0.68081500 |
| H | -0.10595700 | 2.03937300  | -0.02031300 |
| C | 1.95261000  | 4.51252100  | -1.14769300 |
| H | 4.03921100  | 4.23136400  | -1.68284200 |
| H | -0.11105700 | 4.46706100  | -0.54685900 |
| C | 3.24278400  | -0.42876300 | 0.02798100  |
| C | 3.53018500  | -1.68573800 | -0.51002600 |
| C | 4.15550900  | 0.12411400  | 0.94327800  |
| C | 4.68368300  | -2.38734400 | -0.15572400 |
| H | 2.83801100  | -2.12678100 | -1.23101600 |
| C | 5.30446000  | -0.56158600 | 1.30693800  |
| H | 3.95314700  | 1.10150000  | 1.38629700  |
| C | 5.58008600  | -1.82542300 | 0.76064100  |
| H | 4.87356300  | -3.36254500 | -0.60234600 |
| H | 6.01050700  | -0.14044800 | 2.02418900  |

|   |            |             |             |
|---|------------|-------------|-------------|
| O | 1.84799400 | 5.83260000  | -1.39918900 |
| O | 6.71985500 | -2.41932400 | 1.16774300  |
| C | 2.98630100 | 6.51634900  | -1.87195700 |
| H | 3.32845100 | 6.10900500  | -2.83692400 |
| H | 2.68904500 | 7.56221100  | -2.00961700 |
| H | 3.81416200 | 6.46957800  | -1.14613500 |
| C | 7.02903400 | -3.69624100 | 0.65786400  |
| H | 7.97533200 | -3.99780600 | 1.12122500  |
| H | 6.25053400 | -4.43215700 | 0.91619200  |
| H | 7.15543000 | -3.67325800 | -0.43663600 |
| C | 0.85986600 | -0.42574600 | -0.40135400 |

### 3e

|   |            |             |             |
|---|------------|-------------|-------------|
| C | 5.30637400 | -2.60744800 | 0.09176900  |
| C | 4.91518100 | -2.40540400 | -1.21492300 |
| C | 4.13836700 | -1.27705200 | -1.55528700 |
| C | 3.67138600 | -0.39283600 | -0.54097100 |
| C | 4.25992200 | -0.49733500 | 0.75906200  |
| C | 5.02574100 | -1.62156200 | 1.05158600  |
| C | 3.91757700 | -0.95980900 | -2.94497600 |
| C | 2.67873900 | 0.61487600  | -0.93886600 |
| C | 2.62692900 | 0.99156900  | -2.30886500 |
| C | 3.29683300 | 0.19003900  | -3.30140400 |
| C | 1.80868800 | 2.06782700  | -2.70867400 |
| H | 1.83369300 | 2.38987000  | -3.75163800 |
| C | 0.95412300 | 2.66917900  | -1.81063100 |
| C | 0.80122100 | 2.14986800  | -0.51024500 |
| C | 1.66093300 | 1.12423500  | -0.07947200 |
| H | 4.33470000 | -1.63233100 | -3.69733800 |
| H | 5.89578000 | -3.48374100 | 0.36670400  |
| H | 5.22043200 | -3.09167400 | -2.00752500 |
| H | 5.46834200 | -1.71895500 | 2.04430100  |
| H | 3.20818300 | 0.48501400  | -4.34892000 |
| H | 0.33521100 | 3.50937800  | -2.13214000 |
| C | 4.29670200 | 0.66899800  | 1.74617600  |
| C | 5.60064100 | 1.44779400  | 1.52213000  |
| C | 4.17157500 | 0.25365100  | 3.21281300  |
| H | 3.48039700 | 1.36546200  | 1.52511500  |
| H | 5.68174900 | 1.79846200  | 0.48254000  |
| H | 5.63929000 | 2.32526800  | 2.18548200  |
| H | 6.47508400 | 0.81434400  | 1.73788600  |
| H | 3.28507700 | -0.37285700 | 3.39215300  |
| H | 5.05868000 | -0.30232300 | 3.55197100  |
| H | 4.07857900 | 1.14794300  | 3.84411000  |

|   |             |             |             |
|---|-------------|-------------|-------------|
| C | -0.30084400 | 2.73925600  | 0.38403500  |
| C | -0.50703400 | 1.87212000  | 1.64192900  |
| H | 0.05414400  | 3.73556600  | 0.69524200  |
| H | -1.15557900 | 2.37449100  | 2.37166000  |
| C | 1.28417500  | 0.38462200  | 1.22094500  |
| H | 2.06534100  | -0.27749600 | 1.59207000  |
| C | 0.83990800  | 1.46681100  | 2.18430100  |
| O | 1.43076500  | 1.91912800  | 3.12744500  |
| C | -0.02747800 | -0.29920400 | 0.86740700  |
| C | 0.00315300  | -1.55966900 | 0.10026900  |
| C | -0.69636500 | -1.69712900 | -1.10808300 |
| C | 0.82078700  | -2.61570200 | 0.53414100  |
| C | -0.60253700 | -2.87424300 | -1.84882700 |
| H | -1.29428700 | -0.86327500 | -1.48019400 |
| C | 0.91095000  | -3.79239300 | -0.20589700 |
| H | 1.38707800  | -2.51387600 | 1.46292100  |
| C | 0.19657500  | -3.92560900 | -1.39791400 |
| H | -1.14782200 | -2.96515900 | -2.78995300 |
| H | 1.54647100  | -4.60647400 | 0.14689400  |
| H | 0.27158600  | -4.84500100 | -1.98120500 |
| C | -2.39270000 | 0.62991500  | 0.52120800  |
| C | -3.24621100 | -0.58013400 | 0.57966200  |
| C | -3.98788700 | -1.02215900 | -0.52262200 |
| C | -3.24561200 | -1.38348400 | 1.73459900  |
| C | -4.72417700 | -2.20569200 | -0.48377600 |
| H | -3.96457500 | -0.45037600 | -1.45270800 |
| C | -3.97761500 | -2.55846600 | 1.79249100  |
| H | -2.65749600 | -1.07639100 | 2.60187400  |
| C | -4.72556900 | -2.98214100 | 0.68228700  |
| H | -5.27644200 | -2.51940400 | -1.36866700 |
| H | -3.98252700 | -3.17860800 | 2.68987700  |
| C | -2.72757500 | 1.83843600  | -0.02706100 |
| C | -1.69043400 | 2.93174400  | -0.29598300 |
| C | -4.08866800 | 2.15996200  | -0.44115000 |
| C | -2.26603400 | 4.31476300  | 0.02257000  |
| H | -1.54238600 | 2.89853800  | -1.38866700 |
| C | -4.48772700 | 3.40512900  | -0.78263700 |
| H | -4.82844100 | 1.35822400  | -0.43888800 |
| C | -3.59365900 | 4.57111000  | -0.65761300 |
| H | -2.43893800 | 4.40613500  | 1.11074300  |
| H | -5.51368000 | 3.60648200  | -1.09760400 |
| O | -5.39809300 | -4.13959400 | 0.81881200  |
| O | -3.92991100 | 5.68195600  | -1.01479100 |
| C | -6.14649400 | -4.61591300 | -0.27730300 |

|   |             |             |             |
|---|-------------|-------------|-------------|
| H | -5.50201300 | -4.80780700 | -1.15008100 |
| H | -6.60597600 | -5.55761000 | 0.04349300  |
| H | -6.93966500 | -3.90584400 | -0.56114100 |
| C | -1.03908600 | 0.57321600  | 1.08374400  |
| H | -1.56872200 | 5.11167000  | -0.26975300 |

**3e'**

|   |             |             |             |
|---|-------------|-------------|-------------|
| C | -3.31854500 | 1.43632600  | -3.08385600 |
| C | -4.31157800 | 0.57673100  | -2.67912000 |
| C | -4.33119500 | 0.09896100  | -1.34768400 |
| C | -3.27760300 | 0.42988300  | -0.44360400 |
| C | -2.37080100 | 1.48430500  | -0.81745800 |
| C | -2.39641100 | 1.92160700  | -2.13605900 |
| C | -5.46937000 | -0.64104300 | -0.88402100 |
| C | -3.28011600 | -0.24049700 | 0.84940500  |
| C | -4.51255700 | -0.72462100 | 1.33934500  |
| C | -5.60439600 | -0.93709700 | 0.43647800  |
| C | -4.67060100 | -1.01260200 | 2.73291200  |
| H | -5.65684500 | -1.31214100 | 3.09283500  |
| C | -3.62405400 | -0.85516100 | 3.58944400  |
| C | -2.30745600 | -0.62607200 | 3.07687800  |
| C | -2.10627700 | -0.46248900 | 1.67540400  |
| H | -6.26199000 | -0.87404400 | -1.59809400 |
| H | -3.28435000 | 1.80606100  | -4.11015400 |
| H | -5.10822000 | 0.26886100  | -3.35981700 |
| H | -1.71221400 | 2.70738700  | -2.45263600 |
| H | -6.51996800 | -1.38692800 | 0.82575000  |
| H | -3.74816000 | -0.98913700 | 4.66587400  |
| C | -1.56637800 | 2.28026200  | 0.21393600  |
| C | -2.50088000 | 2.86942000  | 1.28249400  |
| C | -0.74809200 | 3.41705100  | -0.39360200 |
| H | -0.85080400 | 1.61942300  | 0.71882100  |
| H | -3.07282500 | 2.10253300  | 1.82155600  |
| H | -1.91360100 | 3.43390900  | 2.02243700  |
| H | -3.21855600 | 3.56347600  | 0.81623800  |
| H | -0.04021000 | 3.05824300  | -1.15275500 |
| H | -1.39519300 | 4.18034900  | -0.85426700 |
| H | -0.16670000 | 3.90900000  | 0.39969200  |
| C | -1.19322700 | -0.66062100 | 3.95170400  |
| C | 0.08635600  | -0.61292300 | 3.46036400  |
| H | -1.37138700 | -0.74051900 | 5.02588700  |
| H | 0.96114600  | -0.63215900 | 4.11133100  |
| C | -0.77583500 | -0.63050400 | 1.15952800  |
| C | 0.28846500  | -0.62946000 | 2.06361800  |

|   |             |             |             |
|---|-------------|-------------|-------------|
| O | 1.57536500  | -0.74149700 | 1.66974000  |
| C | -0.41766400 | -0.98582800 | -0.23467400 |
| C | -1.36462600 | -1.70179800 | -1.13853100 |
| C | -2.21916700 | -2.69524800 | -0.63549800 |
| C | -1.36316400 | -1.44950200 | -2.51593800 |
| C | -3.06779100 | -3.39748800 | -1.48828500 |
| H | -2.21743100 | -2.91895500 | 0.43310800  |
| C | -2.20781300 | -2.15825500 | -3.37015900 |
| H | -0.71147900 | -0.66986000 | -2.91635100 |
| C | -3.06976700 | -3.12802800 | -2.85892600 |
| H | -3.72963500 | -4.16343900 | -1.07954700 |
| H | -2.20222400 | -1.93828600 | -4.43951500 |
| H | -3.73901800 | -3.67544000 | -3.52506400 |
| C | 1.94593700  | -0.38412900 | 0.32951600  |
| C | 2.16737400  | 1.12240200  | 0.22995300  |
| C | 2.39921100  | 1.70371300  | -1.01820800 |
| C | 2.25283400  | 1.92993500  | 1.36982900  |
| C | 2.72229900  | 3.05481500  | -1.14362600 |
| H | 2.34751900  | 1.08962200  | -1.92096900 |
| C | 2.55820800  | 3.28200300  | 1.25960700  |
| H | 2.09176100  | 1.49496500  | 2.35705400  |
| C | 2.79766200  | 3.85585100  | 0.00349200  |
| H | 2.89998100  | 3.47286600  | -2.13374500 |
| H | 2.61784500  | 3.92025600  | 2.14251500  |
| C | 3.24263900  | -1.16445000 | 0.08526500  |
| C | 4.49653600  | -0.56415600 | 0.00438200  |
| C | 3.17078500  | -2.56543900 | 0.00194500  |
| C | 5.65833500  | -1.32452300 | -0.17013000 |
| H | 4.59360400  | 0.51979700  | 0.07720900  |
| C | 4.31043000  | -3.33306300 | -0.17009100 |
| H | 2.19990000  | -3.06084000 | 0.07833300  |
| C | 5.57004200  | -2.71601200 | -0.26075900 |
| H | 6.62036600  | -0.81763800 | -0.23145100 |
| H | 4.25729700  | -4.42065400 | -0.23716800 |
| O | 3.08233700  | 5.17420100  | -0.01181500 |
| O | 6.62699800  | -3.53394800 | -0.43216000 |
| C | 3.29924900  | 5.79777500  | -1.25667700 |
| H | 2.40992800  | 5.72415700  | -1.90356800 |
| H | 3.50309200  | 6.85400100  | -1.04698800 |
| H | 4.16454700  | 5.36168600  | -1.78155700 |
| C | 7.91090400  | -2.95849400 | -0.51927400 |
| H | 8.61694700  | -3.78602400 | -0.65244100 |
| H | 7.98827300  | -2.27604500 | -1.38103200 |
| H | 8.16827400  | -2.40908600 | 0.40056300  |

|   |            |             |             |
|---|------------|-------------|-------------|
| C | 0.86749300 | -0.86555200 | -0.61898900 |
| H | 1.18635900 | -1.22136400 | -1.60019600 |

**DPA**

|   |             |             |             |
|---|-------------|-------------|-------------|
| P | -0.19670500 | 1.95246800  | 0.01868500  |
| O | -0.86588200 | 0.92510200  | -1.02598500 |
| O | 0.49786800  | 3.03828400  | -0.67808600 |
| O | -1.32863800 | 2.43531600  | 1.02133600  |
| H | -1.62235400 | 1.77118900  | 1.67016900  |
| O | 0.66282200  | 0.99828400  | 0.99759800  |
| C | -1.58348800 | -0.19513700 | -0.63381900 |
| C | -2.87148100 | -0.05008600 | -0.12176100 |
| C | -1.00470400 | -1.45074100 | -0.80572200 |
| C | -3.58376600 | -1.19256300 | 0.24486500  |
| H | -3.30819700 | 0.94544100  | -0.02848200 |
| C | -1.72967300 | -2.58340300 | -0.43830700 |
| H | 0.00018700  | -1.52501600 | -1.22490400 |
| C | -3.01537800 | -2.45733000 | 0.09119300  |
| H | -4.59343200 | -1.08924500 | 0.64556300  |
| H | -1.28420300 | -3.57092100 | -0.56897200 |
| H | -3.57762100 | -3.34722400 | 0.37766500  |
| C | 1.64399800  | 0.12426900  | 0.56057000  |
| C | 1.80255900  | -1.05086400 | 1.29229700  |
| C | 2.43651400  | 0.40251300  | -0.55148500 |
| C | 2.76851500  | -1.97159200 | 0.89402800  |
| H | 1.15986100  | -1.22990500 | 2.15529100  |
| C | 3.39329400  | -0.53573500 | -0.94321500 |
| H | 2.30914700  | 1.33873900  | -1.09745400 |
| C | 3.56234900  | -1.72048800 | -0.22752900 |
| H | 2.89678600  | -2.89466900 | 1.46168800  |
| H | 4.01444100  | -0.32812400 | -1.81604500 |
| H | 4.31416900  | -2.44622900 | -0.54038800 |

**DPA-anion**

|   |             |             |             |
|---|-------------|-------------|-------------|
| P | -0.28512000 | 2.20804400  | -0.16896700 |
| O | -0.78588500 | 0.98190000  | -1.19364900 |
| O | 0.69149400  | 3.00466500  | -0.96000000 |
| O | -1.44383300 | 2.79052600  | 0.56061700  |
| O | 0.50429600  | 1.24995500  | 0.95462500  |
| C | -1.38438500 | -0.15984900 | -0.76244500 |
| C | -2.27994200 | -0.18976000 | 0.31401600  |
| C | -1.06588700 | -1.34332200 | -1.43961200 |
| C | -2.83801400 | -1.40692400 | 0.70618500  |
| H | -2.51355600 | 0.74389300  | 0.82667600  |

|   |             |             |             |
|---|-------------|-------------|-------------|
| C | -1.63726900 | -2.54977700 | -1.04275300 |
| H | -0.35812300 | -1.29282200 | -2.26899100 |
| C | -2.52368500 | -2.58997200 | 0.03591300  |
| H | -3.53177600 | -1.42613700 | 1.54941500  |
| H | -1.37990500 | -3.46724900 | -1.57586000 |
| H | -2.96582100 | -3.53639600 | 0.35121700  |
| C | 1.38397900  | 0.26822400  | 0.62389800  |
| C | 1.37893100  | -0.88676500 | 1.41554300  |
| C | 2.26676500  | 0.36942700  | -0.45866000 |
| C | 2.25017500  | -1.93426800 | 1.12742900  |
| H | 0.67365800  | -0.94381800 | 2.24661600  |
| C | 3.12852800  | -0.69119100 | -0.74058200 |
| H | 2.25311900  | 1.27710400  | -1.06272200 |
| C | 3.12794500  | -1.84490900 | 0.04472000  |
| H | 2.23606500  | -2.83144100 | 1.74956500  |
| H | 3.81185400  | -0.60939800 | -1.58854900 |
| H | 3.80573200  | -2.66859600 | -0.18502000 |

#### H<sub>2</sub>O

|   |            |             |             |
|---|------------|-------------|-------------|
| O | 0.00000000 | 0.00000000  | 0.12032000  |
| H | 0.00000000 | 0.75555900  | -0.48127900 |
| H | 0.00000000 | -0.75555900 | -0.48127900 |

#### MeOH

|   |             |             |             |
|---|-------------|-------------|-------------|
| O | -0.74320700 | 0.12365700  | 0.00000400  |
| H | -1.13063500 | -0.76068600 | 0.00001400  |
| C | 0.65363700  | -0.01938700 | 0.00000100  |
| H | 1.02887600  | -0.55041700 | -0.89334900 |
| H | 1.09654300  | 0.98690200  | -0.00099500 |
| H | 1.02905100  | -0.54873200 | 0.89428900  |

#### TS-a1

|   |             |             |             |
|---|-------------|-------------|-------------|
| C | -6.62333800 | -3.15481100 | 0.92151600  |
| C | -7.05503100 | -1.89333100 | 1.27163700  |
| C | -6.47489500 | -0.75466300 | 0.66927900  |
| C | -5.38114400 | -0.89962100 | -0.23086800 |
| C | -5.10030900 | -2.20577200 | -0.74501300 |
| C | -5.69561400 | -3.29910300 | -0.12491400 |
| C | -7.05457200 | 0.54490500  | 0.88886800  |
| C | -4.67559600 | 0.32321900  | -0.62396000 |
| C | -5.37508700 | 1.55942200  | -0.53528700 |
| C | -6.59392600 | 1.63351800  | 0.21995000  |
| C | -4.81356700 | 2.73288600  | -1.10182400 |
| H | -5.39571500 | 3.65616800  | -1.07314000 |

|   |             |             |             |
|---|-------------|-------------|-------------|
| C | -3.55748800 | 2.71488200  | -1.65121700 |
| C | -2.75010000 | 1.54957800  | -1.54221000 |
| C | -3.30284300 | 0.37271200  | -0.98677700 |
| H | -7.92097100 | 0.61639900  | 1.54954200  |
| H | -7.05360200 | -4.04014000 | 1.39256700  |
| H | -7.86126000 | -1.75342700 | 1.99471900  |
| H | -5.47991500 | -4.30323200 | -0.49433500 |
| H | -7.08939200 | 2.60223700  | 0.31016600  |
| H | -3.12885000 | 3.61338100  | -2.10026800 |
| C | -4.39441700 | -2.43918300 | -2.08157800 |
| C | -5.46506700 | -2.52944300 | -3.17847200 |
| C | -3.49980500 | -3.68002500 | -2.11209600 |
| H | -3.77754500 | -1.56803400 | -2.32976900 |
| H | -6.08489200 | -1.62102900 | -3.20658200 |
| H | -4.99137400 | -2.65430500 | -4.16409100 |
| H | -6.12869500 | -3.39053700 | -3.00394400 |
| H | -2.77248200 | -3.69348400 | -1.28684900 |
| H | -4.09451500 | -4.60418300 | -2.05875600 |
| H | -2.93389000 | -3.70697700 | -3.05390500 |
| C | -1.35505900 | 1.61606400  | -1.88697800 |
| C | -0.48536400 | 0.56328800  | -1.56446300 |
| H | -0.96691700 | 2.52832200  | -2.34081500 |
| H | 0.54205700  | 0.59897700  | -1.93512900 |
| C | -2.30573200 | -0.72277200 | -0.60408100 |
| H | -2.74324100 | -1.70836000 | -0.44685500 |
| C | -1.18643000 | -0.75867800 | -1.60373700 |
| O | -0.89457200 | -1.69617300 | -2.31736700 |
| C | -1.57724200 | -0.16684100 | 0.61766000  |
| C | -2.21079200 | -0.19237700 | 1.95613800  |
| C | -3.17595300 | -1.16177500 | 2.27486600  |
| C | -1.85478800 | 0.74332300  | 2.94434600  |
| C | -3.76379100 | -1.19437600 | 3.54000200  |
| H | -3.46770900 | -1.91065100 | 1.53715500  |
| C | -2.44660500 | 0.71094800  | 4.20290400  |
| H | -1.11310300 | 1.51096200  | 2.71621000  |
| C | -3.40477800 | -0.25881300 | 4.50849900  |
| H | -4.50746400 | -1.96117000 | 3.76504400  |
| H | -2.15937500 | 1.45195900  | 4.95103400  |
| H | -3.86708300 | -0.28351400 | 5.49670800  |
| C | 0.65319500  | 1.14264300  | 0.87100900  |
| C | 1.61042700  | 0.43013800  | 1.73627100  |
| C | 2.46159400  | 1.12102500  | 2.61256000  |
| C | 1.67730500  | -0.98062000 | 1.74469200  |
| C | 3.37207000  | 0.45472100  | 3.43503100  |



|   |             |             |             |
|---|-------------|-------------|-------------|
| H | 2.41195000  | 2.20915600  | 2.67271400  |
| C | 2.57091400  | -1.65338500 | 2.55753700  |
| H | 1.04860600  | -1.55444800 | 1.06242200  |
| C | 3.44174100  | -0.94279500 | 3.40273400  |
| H | 4.01253900  | 1.03472100  | 4.09838900  |
| H | 2.62769600  | -2.74326400 | 2.54863500  |
| C | 0.82196700  | 2.54979500  | 0.49012800  |
| C | -0.31300900 | 3.35220800  | 0.27538500  |
| C | 2.08839700  | 3.13465900  | 0.24444200  |
| C | -0.21142600 | 4.68213800  | -0.14517300 |
| H | -1.30089200 | 2.94174600  | 0.49402700  |
| C | 2.19970000  | 4.44059700  | -0.18979100 |
| H | 2.99300300  | 2.53743300  | 0.36661700  |
| C | 1.04926300  | 5.23246500  | -0.38537400 |
| H | -1.11880100 | 5.27073600  | -0.27610200 |
| H | 3.17491000  | 4.88348100  | -0.39853400 |
| O | 4.29529900  | -1.67922500 | 4.14099800  |
| O | 1.26018200  | 6.49476900  | -0.79866900 |
| C | 5.20597200  | -1.00696400 | 4.98108200  |
| H | 4.68336200  | -0.41506000 | 5.74944400  |
| H | 5.80856100  | -1.77947400 | 5.47210600  |
| H | 5.86996600  | -0.34404600 | 4.40293100  |
| C | 0.14111800  | 7.32610500  | -1.01271000 |
| H | 0.52983700  | 8.29403800  | -1.34843300 |
| H | -0.52223400 | 6.91339600  | -1.78975200 |
| H | -0.43466800 | 7.46974500  | -0.08443100 |
| C | -0.43294900 | 0.48805400  | 0.34014700  |
| P | 2.26230900  | -2.15450900 | -1.80960500 |
| O | 2.49815200  | -0.79562900 | -0.97418600 |
| O | 1.56439700  | -3.14145900 | -0.96755400 |
| O | 1.56938500  | -1.75095500 | -3.16870700 |
| H | 0.57764200  | -1.73950800 | -3.03043500 |
| O | 3.73026000  | -2.53313900 | -2.35591600 |
| C | 3.45449900  | 0.17215200  | -1.20553800 |
| C | 3.45651100  | 0.91423200  | -2.38363000 |
| C | 4.39256300  | 0.39715600  | -0.19802100 |
| C | 4.42402300  | 1.90805200  | -2.54915600 |
| H | 2.71440800  | 0.70967900  | -3.15745300 |
| C | 5.35205500  | 1.39049000  | -0.37735300 |
| H | 4.35058500  | -0.21057100 | 0.70841800  |
| C | 5.36950800  | 2.14835800  | -1.55191300 |
| H | 4.43406900  | 2.49743600  | -3.46745600 |
| H | 6.08986900  | 1.57232100  | 0.40614300  |
| H | 6.12249200  | 2.92575600  | -1.68997700 |

|   |            |             |             |
|---|------------|-------------|-------------|
| C | 4.82793500 | -2.58750600 | -1.51180000 |
| C | 6.03316200 | -2.10058500 | -2.01299200 |
| C | 4.72480400 | -3.07905600 | -0.21159000 |
| C | 7.15234200 | -2.08515000 | -1.18410400 |
| H | 6.06860000 | -1.72053500 | -3.03501200 |
| C | 5.85162900 | -3.04270100 | 0.61161200  |
| H | 3.77172100 | -3.46855900 | 0.14980800  |
| C | 7.06289100 | -2.54438100 | 0.13251000  |
| H | 8.09830400 | -1.69840300 | -1.56684700 |
| H | 5.77271800 | -3.40518000 | 1.63822200  |
| H | 7.93900600 | -2.51786700 | 0.78201100  |

**Int a1**

|   |             |             |             |
|---|-------------|-------------|-------------|
| C | -6.13593800 | 2.03597200  | 1.31065200  |
| C | -6.37623500 | 1.51514000  | 0.06360800  |
| C | -5.79370400 | 0.27653100  | -0.31904100 |
| C | -4.86419700 | -0.36686000 | 0.55781900  |
| C | -4.83356000 | 0.06023000  | 1.93519000  |
| C | -5.42363100 | 1.26585500  | 2.26141100  |
| C | -6.16885800 | -0.36319400 | -1.53553800 |
| C | -4.08797900 | -1.44638900 | 0.00678200  |
| C | -4.60198800 | -2.15046600 | -1.08322200 |
| C | -5.67568000 | -1.60447800 | -1.84033800 |
| C | -4.04406400 | -3.45874400 | -1.42732600 |
| H | -4.56939800 | -4.04242700 | -2.18666100 |
| C | -2.97368900 | -3.97123600 | -0.78830500 |
| C | -2.17209000 | -3.13134100 | 0.08914200  |
| C | -2.66398900 | -1.74283600 | 0.36699400  |
| H | -6.90323200 | 0.12528000  | -2.17933700 |
| H | -6.56870500 | 2.99355100  | 1.60509200  |
| H | -7.03164700 | 2.02546500  | -0.64547400 |
| H | -5.41018800 | 1.60318500  | 3.29994300  |
| H | -6.03863200 | -2.15593900 | -2.71010800 |
| H | -2.60963700 | -4.97681600 | -1.00766900 |
| C | -4.46567400 | -0.91101000 | 3.05749500  |
| C | -5.75129300 | -1.60954700 | 3.52413800  |
| C | -3.75582400 | -0.26614900 | 4.24922000  |
| H | -3.81914800 | -1.69925500 | 2.65264700  |
| H | -6.25798300 | -2.11126800 | 2.68651700  |
| H | -5.51869200 | -2.36653000 | 4.28869400  |
| H | -6.45247700 | -0.88214000 | 3.96149600  |
| H | -2.85879300 | 0.29877200  | 3.95424900  |
| H | -4.42494900 | 0.42030300  | 4.78936900  |
| H | -3.44149700 | -1.04356800 | 4.96094600  |

|   |             |             |             |
|---|-------------|-------------|-------------|
| C | -0.88948100 | -3.41824100 | 0.39710800  |
| C | -0.03541500 | -2.23158700 | 0.80655900  |
| H | -0.43099800 | -4.38057700 | 0.16360500  |
| H | 1.00380500  | -2.48852900 | 1.03826700  |
| C | -1.94268800 | -0.90492700 | 1.39604800  |
| H | -2.47029900 | -0.17073600 | 1.99293000  |
| C | -0.77194900 | -1.58968100 | 1.97004300  |
| O | -0.45424400 | -1.61941300 | 3.14268900  |
| C | -1.59845300 | -0.61695100 | -0.04533900 |
| C | -2.18124600 | 0.58549800  | -0.71428400 |
| C | -2.35747300 | 1.77511000  | -0.00270700 |
| C | -2.61233900 | 0.51012900  | -2.04362200 |
| C | -2.95410000 | 2.87980600  | -0.61282900 |
| H | -2.00714300 | 1.83569400  | 1.03000300  |
| C | -3.19304000 | 1.61741200  | -2.65830200 |
| H | -2.48505100 | -0.42394200 | -2.59652000 |
| C | -3.36934800 | 2.80472800  | -1.94210400 |
| H | -3.09078400 | 3.80312500  | -0.04659100 |
| H | -3.51843000 | 1.55163200  | -3.69863300 |
| H | -3.83270700 | 3.66899500  | -2.42165500 |
| C | 0.67935700  | -0.87302600 | -1.25219600 |
| C | 0.51378800  | 0.33323700  | -2.11558800 |
| C | 0.40786600  | 0.22642500  | -3.50274300 |
| C | 0.50043600  | 1.61196300  | -1.53891400 |
| C | 0.22761000  | 1.35431300  | -4.30636200 |
| H | 0.44158400  | -0.76015900 | -3.97165900 |
| C | 0.33470600  | 2.74360200  | -2.32398800 |
| H | 0.59897500  | 1.69504800  | -0.45363700 |
| C | 0.18012700  | 2.62245000  | -3.71403000 |
| H | 0.12245900  | 1.23318400  | -5.38382800 |
| H | 0.30776400  | 3.74172600  | -1.88301000 |
| C | 1.94644700  | -1.62415400 | -1.47273400 |
| C | 2.05340100  | -3.01189700 | -1.31917300 |
| C | 3.10235300  | -0.93579300 | -1.89664300 |
| C | 3.25902100  | -3.68972400 | -1.51554400 |
| H | 1.16795800  | -3.59651600 | -1.07148300 |
| C | 4.30261100  | -1.59219200 | -2.10924600 |
| H | 3.05961900  | 0.14532200  | -2.03998300 |
| C | 4.39978900  | -2.97662400 | -1.90111800 |
| H | 3.28943800  | -4.77045700 | -1.38171300 |
| H | 5.19681300  | -1.04813700 | -2.41797900 |
| O | -0.00290100 | 3.77137000  | -4.39830000 |
| O | 5.61113400  | -3.53158800 | -2.10158200 |
| C | -0.19256300 | 3.69754300  | -5.79181000 |

|   |             |             |             |
|---|-------------|-------------|-------------|
| H | -1.08389500 | 3.10045000  | -6.04535200 |
| H | -0.33804800 | 4.72531700  | -6.14389300 |
| H | 0.68620800  | 3.26558800  | -6.29762400 |
| C | 5.76419300  | -4.91071700 | -1.85729000 |
| H | 6.81695200  | -5.14838300 | -2.04799300 |
| H | 5.52089300  | -5.16164100 | -0.81184800 |
| H | 5.13207100  | -5.51319100 | -2.52938600 |
| C | -0.22912300 | -1.18912000 | -0.29878500 |
| P | 1.81343800  | 0.58504800  | 2.30200800  |
| O | 2.68869200  | 0.27562600  | 0.98870000  |
| O | 0.44853500  | 0.99890900  | 1.91819900  |
| O | 1.95234200  | -0.65568600 | 3.26412300  |
| H | 1.09899900  | -1.16651900 | 3.34802600  |
| O | 2.70576300  | 1.65625300  | 3.10888800  |
| C | 3.99785700  | -0.17936700 | 1.00684300  |
| C | 4.28292000  | -1.48187600 | 1.40945700  |
| C | 4.99283400  | 0.67002000  | 0.52914900  |
| C | 5.59638300  | -1.94208500 | 1.31851000  |
| H | 3.48017900  | -2.12419800 | 1.77258400  |
| C | 6.30178900  | 0.19718000  | 0.44464900  |
| H | 4.72557700  | 1.67964400  | 0.21139600  |
| C | 6.60578500  | -1.10856000 | 0.83418300  |
| H | 5.82792600  | -2.96486600 | 1.62161800  |
| H | 7.08635200  | 0.85326900  | 0.06394400  |
| H | 7.62972900  | -1.47734900 | 0.75838500  |
| C | 3.18297900  | 2.81965800  | 2.53018500  |
| C | 4.47271000  | 3.21313400  | 2.88094900  |
| C | 2.41061600  | 3.56922600  | 1.64386600  |
| C | 5.00236100  | 4.37466000  | 2.32348700  |
| H | 5.04416900  | 2.59663200  | 3.57613300  |
| C | 2.96008300  | 4.72386000  | 1.08415200  |
| H | 1.39361100  | 3.25409200  | 1.40460300  |
| C | 4.25188300  | 5.12916600  | 1.41875000  |
| H | 6.01250500  | 4.68712100  | 2.59338300  |
| H | 2.36389100  | 5.31171300  | 0.38414300  |
| H | 4.67295300  | 6.03408400  | 0.97858200  |

**TS-a2**

|   |             |             |            |
|---|-------------|-------------|------------|
| C | -6.09021700 | -3.30202700 | 2.30788900 |
| C | -6.79179600 | -2.16423900 | 1.97079600 |
| C | -6.35650100 | -1.35600500 | 0.89650400 |
| C | -5.13830500 | -1.65801000 | 0.22283600 |
| C | -4.55658700 | -2.94907400 | 0.43213600 |
| C | -5.01851900 | -3.71537300 | 1.49681700 |

|   |             |             |             |
|---|-------------|-------------|-------------|
| C | -7.19806400 | -0.29352900 | 0.41142600  |
| C | -4.62337900 | -0.64706900 | -0.70556000 |
| C | -5.55251800 | 0.26438800  | -1.27913300 |
| C | -6.86056000 | 0.40272400  | -0.70556200 |
| C | -5.14545400 | 1.10508000  | -2.34858700 |
| H | -5.89325900 | 1.74347700  | -2.82369800 |
| C | -3.83885700 | 1.13667000  | -2.75913000 |
| C | -2.84156700 | 0.42552200  | -2.03207800 |
| C | -3.24463700 | -0.44895700 | -0.98989100 |
| H | -8.14872900 | -0.11727000 | 0.91870600  |
| H | -6.41032100 | -3.92461800 | 3.14501800  |
| H | -7.70292200 | -1.88536900 | 2.50413700  |
| H | -4.57424500 | -4.69584900 | 1.67809700  |
| H | -7.53991600 | 1.14095900  | -1.13636700 |
| H | -3.52864200 | 1.77728900  | -3.58742600 |
| C | -3.65133100 | -3.62636600 | -0.59810900 |
| C | -4.53240700 | -4.47419100 | -1.52654000 |
| C | -2.54153000 | -4.48706400 | 0.00898800  |
| H | -3.18420100 | -2.86533000 | -1.23362600 |
| H | -5.30433800 | -3.86007000 | -2.01352200 |
| H | -3.91856600 | -4.94226200 | -2.31105700 |
| H | -5.03720300 | -5.27320600 | -0.96169300 |
| H | -1.94331200 | -3.93825300 | 0.75192400  |
| H | -2.95225600 | -5.38251200 | 0.49916200  |
| H | -1.85840400 | -4.82757000 | -0.78178100 |
| C | -1.45195600 | 0.69267600  | -2.29141000 |
| C | -0.45636900 | 0.15266200  | -1.35325400 |
| H | -1.14562400 | 1.05153500  | -3.27248200 |
| H | 0.57611900  | 0.20512800  | -1.71357400 |
| C | -2.12826500 | -1.00415500 | -0.10055200 |
| H | -2.39827000 | -1.88361000 | 0.48146600  |
| C | -0.91617600 | -1.22914500 | -0.96344500 |
| O | -0.41664100 | -2.29156500 | -1.27082000 |
| C | -1.64141100 | 0.18404800  | 0.72687400  |
| C | -2.31226500 | 0.58368700  | 1.97647900  |
| C | -3.09893500 | -0.33681000 | 2.69112100  |
| C | -2.19154300 | 1.89058500  | 2.48478000  |
| C | -3.73318700 | 0.03350300  | 3.87641600  |
| H | -3.21792900 | -1.35863500 | 2.32825300  |
| C | -2.82698300 | 2.25689900  | 3.66718500  |
| H | -1.60835300 | 2.63232800  | 1.93764200  |
| C | -3.59948100 | 1.32995400  | 4.37089800  |
| H | -4.33612600 | -0.70094800 | 4.41356900  |
| H | -2.72286400 | 3.27770500  | 4.03903900  |

|   |             |             |             |
|---|-------------|-------------|-------------|
| H | -4.09776400 | 1.61988200  | 5.29752900  |
| C | 0.11614100  | 2.03445500  | 0.23542600  |
| C | 1.05722600  | 2.14360400  | 1.35231700  |
| C | 1.54599900  | 3.38683600  | 1.78847400  |
| C | 1.47965200  | 0.99544100  | 2.05916100  |
| C | 2.45228900  | 3.49159700  | 2.84235100  |
| H | 1.19583600  | 4.30283500  | 1.30973300  |
| C | 2.36912300  | 1.08665700  | 3.11340700  |
| H | 1.11942700  | 0.01181800  | 1.75048500  |
| C | 2.88285400  | 2.33488900  | 3.50467300  |
| H | 2.80502300  | 4.47645300  | 3.14569900  |
| H | 2.70772800  | 0.19561800  | 3.64400000  |
| C | 0.01107400  | 2.96866800  | -0.83254400 |
| C | -1.21070700 | 3.01775200  | -1.57369100 |
| C | 1.10016300  | 3.78058500  | -1.29408200 |
| C | -1.34402100 | 3.87005800  | -2.69960800 |
| H | -2.11780000 | 2.67066500  | -1.08304400 |
| C | 0.97476500  | 4.55435900  | -2.41285600 |
| H | 2.05854800  | 3.73363300  | -0.77532100 |
| C | -0.26111100 | 4.61018400  | -3.13022900 |
| H | -2.31023800 | 3.93782900  | -3.19881100 |
| H | 1.81237600  | 5.13903900  | -2.79632200 |
| O | 3.77424100  | 2.32546600  | 4.51264200  |
| O | -0.26437200 | 5.43269700  | -4.19286500 |
| C | 4.35570600  | 3.54831900  | 4.90596500  |
| H | 3.59737700  | 4.25118500  | 5.28616900  |
| H | 5.06299900  | 3.31473200  | 5.70966400  |
| H | 4.89914200  | 4.01932400  | 4.07071100  |
| C | -1.44724800 | 5.53237900  | -4.95417900 |
| H | -1.23521400 | 6.22615800  | -5.77529900 |
| H | -1.73719600 | 4.55379700  | -5.36973900 |
| H | -2.27878600 | 5.92848300  | -4.34951700 |
| C | -0.67287600 | 0.85709000  | 0.05127400  |
| P | 3.00378100  | -2.79212900 | -1.29893000 |
| O | 3.20274200  | -2.03780700 | 0.11899300  |
| O | 2.69249100  | -4.21135900 | -1.07165000 |
| O | 1.98467300  | -1.95301600 | -2.15926200 |
| H | 1.02693600  | -2.16131700 | -1.92540700 |
| O | 4.35618600  | -2.43769700 | -2.10462200 |
| C | 3.87490500  | -0.84603800 | 0.31337100  |
| C | 3.64317100  | 0.27009600  | -0.48808900 |
| C | 4.78784900  | -0.80480200 | 1.36635300  |
| C | 4.34113000  | 1.44899800  | -0.21699800 |
| H | 2.92950500  | 0.21699900  | -1.31228300 |

|   |            |             |             |
|---|------------|-------------|-------------|
| C | 5.47253100 | 0.37920400  | 1.62865400  |
| H | 4.94572700 | -1.70402400 | 1.96372600  |
| C | 5.25042300 | 1.51011300  | 0.83910200  |
| H | 4.16847500 | 2.32644800  | -0.84296000 |
| H | 6.18227400 | 0.41834000  | 2.45691000  |
| H | 5.78724700 | 2.43742200  | 1.04590300  |
| C | 5.61075200 | -2.61720000 | -1.54842100 |
| C | 6.54799500 | -1.60851700 | -1.76352500 |
| C | 5.92096900 | -3.75110800 | -0.79960600 |
| C | 7.81830800 | -1.73435200 | -1.20665700 |
| H | 6.26227900 | -0.73537300 | -2.35203000 |
| C | 7.19554300 | -3.85792000 | -0.24048100 |
| H | 5.17048100 | -4.53048100 | -0.65765400 |
| C | 8.14378200 | -2.85479500 | -0.43856300 |
| H | 8.55554700 | -0.94594400 | -1.36723200 |
| H | 7.44517000 | -4.73948900 | 0.35236000  |
| H | 9.13744000 | -2.94636900 | 0.00221300  |

**Int a2**

|   |            |             |             |
|---|------------|-------------|-------------|
| C | 5.69107400 | -2.38911900 | -0.09017200 |
| C | 5.40501200 | -1.95695500 | -1.36785400 |
| C | 4.56313100 | -0.84118400 | -1.56673200 |
| C | 3.92508400 | -0.21438600 | -0.45784900 |
| C | 4.40324500 | -0.53285600 | 0.85284100  |
| C | 5.23746200 | -1.63601000 | 1.00506700  |
| C | 4.44459400 | -0.26685600 | -2.88420700 |
| C | 2.88361500 | 0.77742900  | -0.75837400 |
| C | 2.92333200 | 1.41623000  | -2.02778300 |
| C | 3.75398300 | 0.88248200  | -3.07701400 |
| C | 2.04900400 | 2.48908500  | -2.30243200 |
| H | 2.13657100 | 3.00779200  | -3.25921900 |
| C | 1.07003400 | 2.84176100  | -1.40087900 |
| C | 0.85645500 | 2.07242500  | -0.23915800 |
| C | 1.75160200 | 1.03628400  | 0.07194000  |
| H | 4.99010100 | -0.74138400 | -3.70246800 |
| H | 6.32978200 | -3.25871900 | 0.07326100  |
| H | 5.84335500 | -2.44638300 | -2.24004000 |
| H | 5.59695900 | -1.89567700 | 2.00236300  |
| H | 3.73512000 | 1.37531000  | -4.05114500 |
| H | 0.39747500 | 3.67356500  | -1.62411300 |
| C | 4.25531600 | 0.41704900  | 2.04040300  |
| C | 5.50458400 | 1.30751600  | 2.10264800  |
| C | 4.03742400 | -0.28623400 | 3.38067400  |
| H | 3.40742200 | 1.08943500  | 1.87236400  |

|   |             |             |             |
|---|-------------|-------------|-------------|
| H | 5.64779900  | 1.85959700  | 1.16187900  |
| H | 5.41059500  | 2.03890000  | 2.91983100  |
| H | 6.40666900  | 0.70273800  | 2.28422500  |
| H | 3.19679900  | -0.99538000 | 3.34396200  |
| H | 4.93617200  | -0.83682700 | 3.69705600  |
| H | 3.80942600  | 0.45731200  | 4.15640600  |
| C | -0.37902800 | 2.39866800  | 0.60908800  |
| C | -0.57091200 | 1.36793900  | 1.73386200  |
| H | -0.20614700 | 3.38732100  | 1.06164600  |
| H | -1.27513000 | 1.72809300  | 2.49424000  |
| C | 1.32555100  | 0.06055600  | 1.18321000  |
| H | 2.11928000  | -0.61415200 | 1.50120800  |
| C | 0.76859300  | 0.94914300  | 2.28120400  |
| O | 1.27689400  | 1.25955400  | 3.32476300  |
| C | 0.06866200  | -0.62820800 | 0.66337000  |
| C | 0.17299600  | -1.76827700 | -0.26527600 |
| C | -0.69277400 | -1.89739700 | -1.36384900 |
| C | 1.18814900  | -2.72517000 | -0.09511200 |
| C | -0.56969000 | -2.97038500 | -2.24354200 |
| H | -1.45126100 | -1.13469900 | -1.54300900 |
| C | 1.31071100  | -3.79701700 | -0.97703700 |
| H | 1.88557700  | -2.63576900 | 0.74064300  |
| C | 0.42869900  | -3.92656200 | -2.05065500 |
| H | -1.25063500 | -3.05236300 | -3.09264400 |
| H | 2.10277500  | -4.53246300 | -0.82546000 |
| H | 0.52663000  | -4.76460500 | -2.74292200 |
| C | -2.38917200 | 0.17765800  | 0.49641900  |
| C | -3.23166200 | -1.03983800 | 0.53175200  |
| C | -4.09388700 | -1.38065100 | -0.51816800 |
| C | -3.12164000 | -1.94340500 | 1.60523000  |
| C | -4.84329500 | -2.55726700 | -0.50126500 |
| H | -4.16277900 | -0.72823800 | -1.39133700 |
| C | -3.86274500 | -3.11403000 | 1.63995700  |
| H | -2.44143400 | -1.71699700 | 2.42908000  |
| C | -4.73515900 | -3.43195300 | 0.58704900  |
| H | -5.49307900 | -2.78767500 | -1.34466600 |
| H | -3.78226900 | -3.80974600 | 2.47641000  |
| C | -2.77119100 | 1.41999400  | 0.06440500  |
| C | -1.70792700 | 2.48699000  | -0.23953000 |
| C | -4.15708500 | 1.78039700  | -0.19773200 |
| C | -2.24175100 | 3.89532100  | -0.28019400 |
| H | -1.40766100 | 2.23579100  | -1.27561600 |
| C | -4.53130000 | 3.05526300  | -0.43196600 |
| H | -4.92285100 | 1.01016300  | -0.10362500 |



|   |             |             |             |
|---|-------------|-------------|-------------|
| C | -3.55843200 | 4.14491600  | -0.42656100 |
| H | -1.50974300 | 4.70348900  | -0.26027900 |
| H | -5.58132200 | 3.32480800  | -0.55793800 |
| O | -5.41408400 | -4.59025400 | 0.69837000  |
| O | -4.12955000 | 5.36370000  | -0.54280100 |
| C | -6.28970900 | -4.95817600 | -0.34305200 |
| H | -5.75099100 | -5.08387100 | -1.29601200 |
| H | -6.73478700 | -5.91697700 | -0.05382600 |
| H | -7.09156400 | -4.21424100 | -0.47644500 |
| C | -3.27804500 | 6.48306900  | -0.51451300 |
| H | -3.91258200 | 7.36974700  | -0.62552500 |
| H | -2.73106300 | 6.54436200  | 0.44096600  |
| H | -2.54834500 | 6.45147700  | -1.34076500 |
| C | -1.00806300 | 0.12547200  | 0.98993000  |

**TS-a3**

|   |             |             |             |
|---|-------------|-------------|-------------|
| C | -7.28293700 | -0.08441500 | 1.68403400  |
| C | -7.36143500 | 0.28560900  | 0.35812800  |
| C | -6.36514400 | -0.12740400 | -0.55278700 |
| C | -5.22381400 | -0.84542900 | -0.09374700 |
| C | -5.26983300 | -1.39952300 | 1.22485300  |
| C | -6.27231800 | -0.97120800 | 2.08946100  |
| C | -6.56583200 | 0.07837400  | -1.96613500 |
| C | -4.12321900 | -1.03239400 | -1.04892500 |
| C | -4.42912400 | -0.96737500 | -2.43599800 |
| C | -5.69383900 | -0.43000400 | -2.86948100 |
| C | -3.44453200 | -1.30381100 | -3.38827700 |
| H | -3.71592500 | -1.31331600 | -4.44584000 |
| C | -2.15132000 | -1.56819300 | -2.99448200 |
| C | -1.76447000 | -1.40002900 | -1.65045600 |
| C | -2.74706800 | -1.12467300 | -0.68461300 |
| H | -7.47814500 | 0.58567100  | -2.28656000 |
| H | -8.04103400 | 0.24137400  | 2.39816200  |
| H | -8.20219700 | 0.87453300  | -0.01418900 |
| H | -6.30900700 | -1.37694700 | 3.10196300  |
| H | -5.88530800 | -0.36098900 | -3.94222800 |
| H | -1.40054800 | -1.83833900 | -3.74062200 |
| C | -4.43922100 | -2.61294300 | 1.64136100  |
| C | -5.27177200 | -3.87652300 | 1.38152700  |
| C | -3.96545400 | -2.57893200 | 3.09486300  |
| H | -3.55329000 | -2.69195000 | 1.00201100  |
| H | -5.57947800 | -3.94115400 | 0.32728400  |
| H | -4.68539600 | -4.77562400 | 1.62478200  |
| H | -6.18057200 | -3.87949700 | 2.00322700  |

|   |             |             |             |
|---|-------------|-------------|-------------|
| H | -3.42060100 | -1.65240800 | 3.33080700  |
| H | -4.80889600 | -2.66906000 | 3.79584900  |
| H | -3.28490700 | -3.42075200 | 3.28196800  |
| C | -0.27618400 | -1.53169400 | -1.30564900 |
| C | 0.00558600  | -1.07583200 | 0.13756900  |
| H | -0.02885200 | -2.60288900 | -1.38228300 |
| H | 1.02285200  | -1.35600600 | 0.43906600  |
| C | -2.25725900 | -0.66645800 | 0.70398500  |
| H | -3.04500700 | -0.62611400 | 1.45542900  |
| C | -1.09251200 | -1.58289200 | 1.03256600  |
| O | -1.06526600 | -2.51535500 | 1.79178100  |
| C | -1.56211100 | 0.65936800  | 0.42834800  |
| C | -2.35643800 | 1.89261000  | 0.27692900  |
| C | -2.17435500 | 2.74670400  | -0.82211200 |
| C | -3.36090600 | 2.19615900  | 1.21020100  |
| C | -2.95276500 | 3.89334500  | -0.96406400 |
| H | -1.43334700 | 2.49448800  | -1.58233900 |
| C | -4.13865100 | 3.34333400  | 1.06628400  |
| H | -3.52763100 | 1.53228300  | 2.06146400  |
| C | -3.93298800 | 4.19753700  | -0.01816100 |
| H | -2.80086700 | 4.54623800  | -1.82535800 |
| H | -4.91146800 | 3.56834500  | 1.80321200  |
| H | -4.54445700 | 5.09429500  | -0.13223000 |
| C | 0.71928100  | 1.20164400  | -0.63219800 |
| C | 0.99768200  | 2.58779100  | -0.20592300 |
| C | 1.25089400  | 3.61525100  | -1.12421700 |
| C | 0.91589700  | 2.93307900  | 1.15736000  |
| C | 1.45300100  | 4.93190500  | -0.71373000 |
| H | 1.25258100  | 3.39596000  | -2.19371100 |
| C | 1.11768600  | 4.23520400  | 1.58184900  |
| H | 0.69206300  | 2.15935200  | 1.89452900  |
| C | 1.39475100  | 5.24927600  | 0.64970800  |
| H | 1.63414800  | 5.70166400  | -1.46254400 |
| H | 1.06169000  | 4.50108400  | 2.63831000  |
| C | 1.31541800  | 0.52431000  | -1.66993200 |
| C | 0.70137600  | -0.75443200 | -2.25495200 |
| C | 2.53988200  | 0.98629800  | -2.27702500 |
| C | 1.75115600  | -1.70885700 | -2.81041300 |
| H | 0.10485600  | -0.38512900 | -3.10849900 |
| C | 3.29064000  | 0.22362000  | -3.11674500 |
| H | 2.94145700  | 1.95204300  | -1.96619700 |
| C | 2.91699700  | -1.14061500 | -3.37264900 |
| H | 1.32787600  | -2.54714100 | -3.37949700 |
| H | 4.25056300  | 0.56804100  | -3.50148600 |

|   |             |             |             |
|---|-------------|-------------|-------------|
| O | 1.57255400  | 6.48593600  | 1.14565600  |
| O | 3.79237600  | -1.82223600 | -4.05807900 |
| C | 1.84079800  | 7.54053600  | 0.24778500  |
| H | 1.00994000  | 7.68439900  | -0.46120700 |
| H | 1.95612300  | 8.44561200  | 0.85456400  |
| H | 2.77098400  | 7.36110000  | -0.31437000 |
| C | 3.64686700  | -3.23478900 | -4.18983700 |
| H | 4.55452500  | -3.58511100 | -4.68998800 |
| H | 3.56709200  | -3.68961800 | -3.19343400 |
| H | 2.76569100  | -3.47729000 | -4.80055100 |
| C | -0.27469700 | 0.40765600  | 0.09210800  |
| P | 3.91057800  | -2.47729400 | -0.32297400 |
| O | 4.33964800  | -3.03297500 | 1.14471600  |
| O | 5.06279600  | -2.55360400 | -1.25094400 |
| O | 2.57667800  | -3.11450800 | -0.73778700 |
| H | 2.20181700  | -2.42841400 | -1.79830400 |
| O | 3.44134200  | -0.94612300 | 0.02011300  |
| C | 3.65512500  | -2.70773800 | 2.29682400  |
| C | 2.28284900  | -2.92899700 | 2.42213600  |
| C | 4.39114600  | -2.15218100 | 3.34338500  |
| C | 1.64548700  | -2.57437100 | 3.61212600  |
| H | 1.72424500  | -3.36271400 | 1.59148100  |
| C | 3.74435400  | -1.81281800 | 4.53050900  |
| H | 5.46102900  | -1.98758600 | 3.20611700  |
| C | 2.37010600  | -2.01840900 | 4.66731100  |
| H | 0.57017900  | -2.73640400 | 3.69957500  |
| H | 4.31906100  | -1.37764700 | 5.35000800  |
| H | 1.86477300  | -1.74606000 | 5.59518000  |
| C | 4.25475500  | 0.09299100  | 0.39413100  |
| C | 3.76652900  | 0.94211000  | 1.38855300  |
| C | 5.48610600  | 0.33795800  | -0.21828500 |
| C | 4.51033300  | 2.05849400  | 1.76519900  |
| H | 2.80440200  | 0.71117300  | 1.85023700  |
| C | 6.22397900  | 1.45498200  | 0.17653200  |
| H | 5.84354500  | -0.34468400 | -0.98933800 |
| C | 5.74163300  | 2.31921100  | 1.16039300  |
| H | 4.12456000  | 2.72629600  | 2.53782100  |
| H | 7.18661700  | 1.65171000  | -0.29913700 |
| H | 6.32388600  | 3.19302200  | 1.45646900  |

**Int a3**

|   |            |             |             |
|---|------------|-------------|-------------|
| C | 7.22242100 | -0.33532700 | -1.65695900 |
| C | 7.30964200 | 0.05241600  | -0.33673700 |
| C | 6.29856600 | -0.31482500 | 0.57760700  |

|   |             |             |             |
|---|-------------|-------------|-------------|
| C | 5.13609200  | -1.00293400 | 0.12596700  |
| C | 5.16798700  | -1.57943800 | -1.18347200 |
| C | 6.18539300  | -1.19624100 | -2.05164300 |
| C | 6.50224700  | -0.09474000 | 1.98825100  |
| C | 4.02716100  | -1.13827600 | 1.07985300  |
| C | 4.33073200  | -1.06140400 | 2.46653700  |
| C | 5.61144800  | -0.56052500 | 2.89633800  |
| C | 3.33191700  | -1.34831800 | 3.42069300  |
| H | 3.60012500  | -1.35151400 | 4.47909400  |
| C | 2.03168400  | -1.57258400 | 3.02658200  |
| C | 1.65435200  | -1.41164600 | 1.67861700  |
| C | 2.64921700  | -1.18893400 | 0.71206300  |
| H | 7.43000100  | 0.38683100  | 2.30402400  |
| H | 7.99222600  | -0.04494200 | -2.37380600 |
| H | 8.16806500  | 0.61973100  | 0.02873400  |
| H | 6.21201400  | -1.61871600 | -3.05758100 |
| H | 5.80219600  | -0.48241700 | 3.96857800  |
| H | 1.26857000  | -1.80321900 | 3.77353600  |
| C | 4.30024600  | -2.77258000 | -1.58282000 |
| C | 5.09138700  | -4.05746800 | -1.29911000 |
| C | 3.83254600  | -2.74776500 | -3.03857800 |
| H | 3.41050300  | -2.81329000 | -0.94485200 |
| H | 5.39261000  | -4.11480700 | -0.24259600 |
| H | 4.47757600  | -4.94115100 | -1.53063700 |
| H | 6.00201200  | -4.09883500 | -1.91675700 |
| H | 3.32305500  | -1.80635800 | -3.29394000 |
| H | 4.67459400  | -2.88148000 | -3.73427700 |
| H | 3.12234200  | -3.56745600 | -3.21319800 |
| C | 0.16255600  | -1.48264900 | 1.33395000  |
| C | -0.09557300 | -1.04308000 | -0.11948000 |
| H | -0.14656600 | -2.53648700 | 1.42149300  |
| H | -1.12049700 | -1.29492800 | -0.41428500 |
| C | 2.18459600  | -0.73949600 | -0.68854000 |
| H | 2.97692200  | -0.74243900 | -1.43579000 |
| C | 0.98146900  | -1.60809300 | -1.00758900 |
| O | 0.91311000  | -2.53785100 | -1.76648500 |
| C | 1.54867200  | 0.61952600  | -0.44177600 |
| C | 2.39915400  | 1.81759200  | -0.32115800 |
| C | 2.29794500  | 2.68062600  | 0.78084700  |
| C | 3.37905700  | 2.07014400  | -1.29471600 |
| C | 3.13529400  | 3.78878300  | 0.88815300  |
| H | 1.57431100  | 2.46505700  | 1.56900100  |
| C | 4.21328400  | 3.18059500  | -1.18632200 |
| H | 3.48075600  | 1.39682700  | -2.14884000 |

|   |             |             |             |
|---|-------------|-------------|-------------|
| C | 4.09049600  | 4.04439000  | -0.09709600 |
| H | 3.04954500  | 4.44945100  | 1.75256000  |
| H | 4.96559700  | 3.36859200  | -1.95407500 |
| H | 4.74768300  | 4.91129700  | -0.00990500 |
| C | -0.69052600 | 1.28439700  | 0.60618600  |
| C | -0.88104600 | 2.67972200  | 0.19455600  |
| C | -1.08063400 | 3.70688200  | 1.12905400  |
| C | -0.76873200 | 3.03391000  | -1.16600800 |
| C | -1.19349700 | 5.03724400  | 0.73581100  |
| H | -1.10183900 | 3.47069800  | 2.19488500  |
| C | -0.88922600 | 4.34998600  | -1.57220000 |
| H | -0.59305400 | 2.25523200  | -1.91112400 |
| C | -1.10529100 | 5.36704800  | -0.62453500 |
| H | -1.32898500 | 5.80852700  | 1.49242600  |
| H | -0.81456300 | 4.62743700  | -2.62429600 |
| C | -1.33702000 | 0.64329400  | 1.65079600  |
| C | -0.77186600 | -0.63691200 | 2.26913300  |
| C | -2.54345700 | 1.16424100  | 2.19121100  |
| C | -1.84032000 | -1.54663300 | 2.89203800  |
| H | -0.15536800 | -0.25971800 | 3.10123400  |
| C | -3.35705800 | 0.47338100  | 3.06527600  |
| H | -2.90838700 | 2.12252000  | 1.81637900  |
| C | -3.07878400 | -0.87418600 | 3.34671200  |
| H | -1.40457600 | -2.07633500 | 3.75574600  |
| H | -4.31032700 | 0.88412900  | 3.39648800  |
| O | -1.19916700 | 6.61584200  | -1.10231700 |
| O | -3.98806400 | -1.53234400 | 3.98562400  |
| C | -1.40320300 | 7.67763400  | -0.19335000 |
| H | -0.56799800 | 7.75773600  | 0.52012600  |
| H | -1.45508900 | 8.59351800  | -0.79214400 |
| H | -2.34638700 | 7.55251000  | 0.36127600  |
| C | -3.89301500 | -2.95119200 | 4.18029000  |
| H | -4.76300700 | -3.21932000 | 4.78652600  |
| H | -3.94802300 | -3.44285000 | 3.20073700  |
| H | -2.96865900 | -3.20282300 | 4.71545100  |
| C | 0.24725100  | 0.42843600  | -0.10936400 |
| P | -3.76419200 | -2.68734000 | 0.23063300  |
| O | -4.38412600 | -2.86701000 | -1.29043500 |
| O | -4.89447100 | -2.85875100 | 1.18839600  |
| O | -2.46418600 | -3.41154500 | 0.38686600  |
| H | -2.13513900 | -2.34961300 | 2.19091900  |
| O | -3.32112400 | -1.08171800 | 0.14332800  |
| C | -3.73360900 | -2.42982700 | -2.41300200 |
| C | -2.35661900 | -2.59295900 | -2.59789400 |

|   |             |             |             |
|---|-------------|-------------|-------------|
| C | -4.50748400 | -1.79795200 | -3.39078700 |
| C | -1.76161500 | -2.10008400 | -3.76044100 |
| H | -1.76369300 | -3.09006900 | -1.82935100 |
| C | -3.90234600 | -1.32121700 | -4.55157400 |
| H | -5.57793100 | -1.67940200 | -3.21392200 |
| C | -2.52564400 | -1.46412500 | -4.73987100 |
| H | -0.68468600 | -2.22393300 | -3.89085400 |
| H | -4.51141200 | -0.82609900 | -5.31030400 |
| H | -2.05246000 | -1.08368900 | -5.64648400 |
| C | -4.15171300 | -0.06716600 | -0.23508100 |
| C | -3.63041700 | 0.88850200  | -1.11226600 |
| C | -5.45503200 | 0.05658600  | 0.25555300  |
| C | -4.40699300 | 1.98358500  | -1.48531100 |
| H | -2.61612000 | 0.75025200  | -1.49331100 |
| C | -6.22621700 | 1.15229700  | -0.13518700 |
| H | -5.83703100 | -0.70768600 | 0.93327300  |
| C | -5.70855300 | 2.12065900  | -0.99712700 |
| H | -3.99308800 | 2.72993000  | -2.16651000 |
| H | -7.24455000 | 1.25031800  | 0.24614100  |
| H | -6.31811500 | 2.97630900  | -1.29157700 |

**TS-a4**

|   |            |             |             |
|---|------------|-------------|-------------|
| C | 8.84595200 | -1.71862700 | 0.99644900  |
| C | 8.10379100 | -1.83182600 | 2.15295100  |
| C | 6.72002300 | -2.10215600 | 2.08283700  |
| C | 6.06335300 | -2.16539900 | 0.82065300  |
| C | 6.87743900 | -2.26465400 | -0.35178100 |
| C | 8.23767400 | -1.99518400 | -0.23884700 |
| C | 5.99743500 | -2.43008200 | 3.28737900  |
| C | 4.59520300 | -2.21052300 | 0.83261100  |
| C | 3.95554300 | -2.69343000 | 2.00687600  |
| C | 4.70377300 | -2.82779400 | 3.23091900  |
| C | 2.56303100 | -2.91534600 | 2.00516900  |
| H | 2.09806700 | -3.35384500 | 2.89041600  |
| C | 1.79629400 | -2.54166600 | 0.92358200  |
| C | 2.37002900 | -1.83097600 | -0.14878100 |
| C | 3.76457700 | -1.66276700 | -0.18981400 |
| H | 6.54519100 | -2.42423600 | 4.23194900  |
| H | 9.91318900 | -1.49523500 | 1.04034700  |
| H | 8.57275100 | -1.74313700 | 3.13504200  |
| H | 8.86592600 | -2.05114700 | -1.12953000 |
| H | 4.17564800 | -3.16771500 | 4.12405000  |
| H | 0.72099300 | -2.73371300 | 0.93057000  |
| C | 6.37798100 | -2.89458400 | -1.65129900 |

|   |             |             |             |
|---|-------------|-------------|-------------|
| C | 6.70128500  | -4.39504000 | -1.61176000 |
| C | 6.95465000  | -2.26039400 | -2.91730400 |
| H | 5.28662500  | -2.81710000 | -1.70478600 |
| H | 6.24902600  | -4.87728200 | -0.73242400 |
| H | 6.31421400  | -4.89209000 | -2.51430100 |
| H | 7.78933100  | -4.55833700 | -1.56865800 |
| H | 6.80706200  | -1.17015500 | -2.93917700 |
| H | 8.03205700  | -2.46246300 | -3.01329000 |
| H | 6.45694300  | -2.68069500 | -3.80189200 |
| C | 1.43507700  | -1.28042700 | -1.23608100 |
| C | 2.18980700  | -0.32499600 | -2.18002200 |
| H | 1.08988100  | -2.15114000 | -1.81722400 |
| H | 1.59096200  | -0.08215300 | -3.06747700 |
| C | 4.32593700  | -0.65274600 | -1.21206200 |
| H | 5.41032800  | -0.68581900 | -1.31106200 |
| C | 3.54737700  | -0.90686600 | -2.48848000 |
| O | 3.90783400  | -1.46445200 | -3.48884600 |
| C | 3.76548300  | 0.68269600  | -0.74823300 |
| C | 4.42430700  | 1.40470800  | 0.35647400  |
| C | 3.70571700  | 1.82347700  | 1.48627400  |
| C | 5.81217900  | 1.61511300  | 0.31826600  |
| C | 4.35492500  | 2.46822400  | 2.53751700  |
| H | 2.63592300  | 1.61713900  | 1.54963800  |
| C | 6.45869700  | 2.26220000  | 1.36895800  |
| H | 6.38717400  | 1.27626800  | -0.54677900 |
| C | 5.73075000  | 2.69403500  | 2.47903100  |
| H | 3.78418900  | 2.78493500  | 3.41224700  |
| H | 7.53659300  | 2.42616100  | 1.32243100  |
| H | 6.23819300  | 3.19672200  | 3.30417400  |
| C | 1.40442600  | 1.67928800  | -0.87304700 |
| C | 1.61754800  | 3.12393400  | -0.63569300 |
| C | 1.07497200  | 3.78212900  | 0.47531400  |
| C | 2.47480900  | 3.85393000  | -1.47966200 |
| C | 1.34787900  | 5.12387600  | 0.73562000  |
| H | 0.45508600  | 3.22768200  | 1.18319300  |
| C | 2.74961700  | 5.18989400  | -1.23917300 |
| H | 2.93053100  | 3.35979600  | -2.34008400 |
| C | 2.18792800  | 5.83972300  | -0.12778600 |
| H | 0.91718700  | 5.59399200  | 1.61861400  |
| H | 3.40788000  | 5.75953700  | -1.89640700 |
| C | 0.22551300  | 0.99523800  | -0.73538600 |
| C | 0.17202300  | -0.53527700 | -0.70352000 |
| C | -1.05022200 | 1.66628800  | -0.54912900 |
| C | -1.08434500 | -1.04238100 | -1.43086600 |

|   |              |             |             |
|---|--------------|-------------|-------------|
| H | 0.05284300   | -0.78501500 | 0.36465900  |
| C | -2.23949900  | 1.02198500  | -0.53857300 |
| H | -1.05307700  | 2.74824000  | -0.41442100 |
| C | -2.29591700  | -0.40228900 | -0.82366400 |
| H | -1.04206200  | -0.74558900 | -2.48728700 |
| H | -3.19299000  | 1.51874200  | -0.34848200 |
| O | 2.51567400   | 7.13279700  | 0.03874800  |
| O | -3.18355500  | -1.05562000 | -0.15495000 |
| C | 1.99281400   | 7.82295000  | 1.15263300  |
| H | 2.32093200   | 7.36343500  | 2.09859100  |
| H | 2.38106600   | 8.84601700  | 1.09632100  |
| H | 0.89189700   | 7.85260000  | 1.12574000  |
| C | -3.32508000  | -2.47842200 | -0.26351400 |
| H | -4.26131000  | -2.71682200 | 0.24911000  |
| H | -3.39374900  | -2.77596100 | -1.31642800 |
| H | -2.48009800  | -2.96973900 | 0.23655100  |
| C | 2.53596600   | 0.84572800  | -1.29039800 |
| H | -1.14209200  | -2.13558100 | -1.38268800 |
| O | -3.35650700  | -0.21246700 | -2.63771700 |
| H | -4.10522700  | -0.86401000 | -2.54388000 |
| H | -3.84839300  | 0.59872700  | -2.39717500 |
| P | -6.04903200  | -0.27903900 | -1.07137600 |
| O | -6.08982800  | -0.68129900 | 0.52611100  |
| O | -5.34471600  | 1.03981900  | -1.16774500 |
| O | -5.57109100  | -1.43367000 | -1.91167600 |
| O | -7.66033400  | -0.14598900 | -1.37432700 |
| C | -6.94481300  | -1.61222300 | 1.05321600  |
| C | -7.28305600  | -2.78786600 | 0.37651400  |
| C | -7.47882200  | -1.34001900 | 2.31528100  |
| C | -8.17183700  | -3.68326200 | 0.97370100  |
| H | -6.85822400  | -2.97928600 | -0.60998700 |
| C | -8.35962700  | -2.24587500 | 2.90117300  |
| H | -7.20071800  | -0.40895300 | 2.81173500  |
| C | -8.71368900  | -3.41955800 | 2.23183700  |
| H | -8.44168400  | -4.59853400 | 0.44330200  |
| H | -8.77902400  | -2.02785300 | 3.88508000  |
| H | -9.40930700  | -4.12463800 | 2.68921800  |
| C | -8.52760100  | 0.52646100  | -0.55314500 |
| C | -9.78203900  | -0.05140000 | -0.34336500 |
| C | -8.18874300  | 1.73457500  | 0.06149100  |
| C | -10.70035900 | 0.58031100  | 0.49181500  |
| H | -10.01192800 | -0.99867400 | -0.83393400 |
| C | -9.11606400  | 2.35221400  | 0.90182900  |
| H | -7.20491100  | 2.16832600  | -0.12175200 |



|   |              |            |            |
|---|--------------|------------|------------|
| C | -10.36999800 | 1.78189200 | 1.12247000 |
| H | -11.67850800 | 0.12476400 | 0.65682500 |
| H | -8.85106500  | 3.29375900 | 1.38671100 |
| H | -11.08810500 | 2.27183200 | 1.78170900 |

**Int a4**

|   |            |             |             |
|---|------------|-------------|-------------|
| C | 8.47981400 | 0.44272500  | 1.82649300  |
| C | 7.66979300 | -0.01357300 | 2.84483500  |
| C | 6.52713800 | -0.78801700 | 2.54833900  |
| C | 6.14753000 | -1.02027400 | 1.19535900  |
| C | 7.10853400 | -0.73343800 | 0.17460300  |
| C | 8.22474400 | 0.02676600  | 0.50939300  |
| C | 5.81281100 | -1.44040500 | 3.61799600  |
| C | 4.82604600 | -1.61964900 | 0.96534300  |
| C | 4.25117500 | -2.38114100 | 2.01921800  |
| C | 4.79816800 | -2.29689000 | 3.34952400  |
| C | 3.06725900 | -3.11350200 | 1.79049200  |
| H | 2.67721600 | -3.74802900 | 2.58892300  |
| C | 2.39002800 | -2.98992700 | 0.59808600  |
| C | 2.80359600 | -2.05233100 | -0.36829200 |
| C | 4.01462500 | -1.36667600 | -0.18131400 |
| H | 6.16449800 | -1.28513000 | 4.64000500  |
| H | 9.35744000 | 1.05330100  | 2.04525600  |
| H | 7.91039400 | 0.18859200  | 3.89059800  |
| H | 8.95676000 | 0.26380200  | -0.26464300 |
| H | 4.31298200 | -2.86706300 | 4.14428000  |
| H | 1.47755100 | -3.56402600 | 0.42414600  |
| C | 7.10093100 | -1.43089000 | -1.18509100 |
| C | 7.98016500 | -2.68570200 | -1.08563700 |
| C | 7.56464100 | -0.54869000 | -2.34481600 |
| H | 6.08914700 | -1.78233400 | -1.41435500 |
| H | 7.62818200 | -3.35663900 | -0.28798800 |
| H | 7.96043800 | -3.24083500 | -2.03587400 |
| H | 9.02466500 | -2.41422900 | -0.86708700 |
| H | 7.00434700 | 0.39705000  | -2.39636100 |
| H | 8.63556600 | -0.30836500 | -2.26442200 |
| H | 7.41118500 | -1.07659100 | -3.29585300 |
| C | 1.88399700 | -1.82431800 | -1.57616800 |
| C | 2.38733600 | -0.64998900 | -2.43607500 |
| H | 1.92510400 | -2.74515700 | -2.18074200 |
| H | 1.89865900 | -0.63155200 | -3.41847100 |
| C | 4.29631000 | -0.17757400 | -1.11713000 |
| H | 5.31464000 | 0.20127500  | -1.04757800 |
| C | 3.89320800 | -0.66982100 | -2.49519100 |

|   |             |             |             |
|---|-------------|-------------|-------------|
| O | 4.59938500  | -1.01371900 | -3.40416300 |
| C | 3.20614900  | 0.83983800  | -0.80506100 |
| C | 3.34057200  | 1.73992800  | 0.35501500  |
| C | 2.25134700  | 2.02225000  | 1.19601900  |
| C | 4.59401700  | 2.28999900  | 0.67350800  |
| C | 2.40440700  | 2.85805200  | 2.29997800  |
| H | 1.28365300  | 1.56065700  | 0.99724500  |
| C | 4.74572400  | 3.12360100  | 1.77948200  |
| H | 5.46063500  | 2.06993700  | 0.04641700  |
| C | 3.65006800  | 3.41530800  | 2.59305800  |
| H | 1.54692300  | 3.06411600  | 2.94311500  |
| H | 5.72682100  | 3.54385300  | 2.00767100  |
| H | 3.76914300  | 4.06620100  | 3.46097200  |
| C | 0.70216300  | 0.91762200  | -1.45965400 |
| C | 0.30417800  | 2.34293400  | -1.41737900 |
| C | -0.72610800 | 2.80057700  | -0.58593300 |
| C | 1.01647400  | 3.30046200  | -2.16343700 |
| C | -1.06606500 | 4.15100200  | -0.51247700 |
| H | -1.26020300 | 2.09077000  | 0.04920300  |
| C | 0.68901900  | 4.64568600  | -2.10496500 |
| H | 1.84040000  | 2.97782300  | -2.80344500 |
| C | -0.35931600 | 5.08492700  | -1.28033300 |
| H | -1.86951000 | 4.46381600  | 0.15308300  |
| H | 1.23595100  | 5.38701700  | -2.68916600 |
| C | -0.14349500 | -0.15618000 | -1.44392200 |
| C | 0.38186800  | -1.57568900 | -1.19491000 |
| C | -1.58499900 | -0.01612800 | -1.64193800 |
| C | -0.52868500 | -2.63017400 | -1.82753800 |
| H | 0.29587000  | -1.70610300 | -0.10261900 |
| C | -2.43877100 | -1.05178400 | -1.63445400 |
| H | -1.96780900 | 0.97748400  | -1.88236200 |
| C | -1.97253800 | -2.46459100 | -1.37624500 |
| H | -0.51577000 | -2.55000200 | -2.92548500 |
| H | -3.49230700 | -0.90592300 | -1.88394600 |
| O | -0.60861300 | 6.40787200  | -1.27770200 |
| O | -2.05198600 | -2.64232100 | 0.06650100  |
| C | -1.64380700 | 6.89345900  | -0.45252700 |
| H | -1.44185900 | 6.68333000  | 0.61012300  |
| H | -1.68112300 | 7.97827300  | -0.60308000 |
| H | -2.61687600 | 6.45686800  | -0.72919600 |
| C | -1.75889200 | -3.94014800 | 0.57068900  |
| H | -2.22555400 | -4.01229800 | 1.56134700  |
| H | -2.17641000 | -4.71438900 | -0.08612800 |
| H | -0.67378500 | -4.08007400 | 0.67823500  |

|   |              |             |             |
|---|--------------|-------------|-------------|
| C | 2.12149700   | 0.55522100  | -1.56307700 |
| H | -0.17891200  | -3.64077300 | -1.56767300 |
| O | -2.75926700  | -3.39886700 | -2.00877600 |
| H | -3.69040100  | -3.22264800 | -1.75483200 |
| P | -5.25291200  | -1.66515700 | 0.18712000  |
| O | -5.50234400  | -0.20275600 | -0.44631700 |
| O | -5.16962800  | -2.65510200 | -0.91482600 |
| O | -4.03617000  | -1.59244300 | 1.16153200  |
| H | -3.18046300  | -1.99199600 | 0.73617000  |
| O | -6.46574800  | -1.84596700 | 1.22554500  |
| C | -5.63522000  | 0.95517600  | 0.30515900  |
| C | -4.55101300  | 1.46191400  | 1.01912400  |
| C | -6.86154800  | 1.61556100  | 0.27790900  |
| C | -4.70925100  | 2.65298300  | 1.72788000  |
| H | -3.60279900  | 0.92401700  | 1.01420300  |
| C | -7.00378300  | 2.80707700  | 0.98791500  |
| H | -7.68523700  | 1.18944000  | -0.29787600 |
| C | -5.93138800  | 3.32656900  | 1.71501700  |
| H | -3.86659300  | 3.05523900  | 2.29310100  |
| H | -7.96094400  | 3.33071000  | 0.97113900  |
| H | -6.04797400  | 4.25825700  | 2.27047000  |
| C | -7.79170600  | -1.62022000 | 0.89585100  |
| C | -8.59392500  | -1.05404500 | 1.88421500  |
| C | -8.30311000  | -1.94596800 | -0.35916200 |
| C | -9.93475200  | -0.80038000 | 1.60514000  |
| H | -8.15195000  | -0.81188800 | 2.85158900  |
| C | -9.64644200  | -1.67644400 | -0.62611000 |
| H | -7.65875100  | -2.40340900 | -1.11173900 |
| C | -10.46372000 | -1.10503600 | 0.34888200  |
| H | -10.56829900 | -0.35543100 | 2.37418100  |
| H | -10.05386200 | -1.92349700 | -1.60783600 |
| H | -11.51292600 | -0.89991300 | 0.13201300  |

**TS-a5**

|   |            |             |            |
|---|------------|-------------|------------|
| C | 8.75725700 | -0.37029700 | 1.75938800 |
| C | 7.89099200 | -0.60118500 | 2.80694000 |
| C | 6.62588700 | -1.17929600 | 2.56582000 |
| C | 6.19579700 | -1.43964000 | 1.23298100 |
| C | 7.18016900 | -1.39912500 | 0.19507300 |
| C | 8.41681300 | -0.82638200 | 0.47557000 |
| C | 5.81973100 | -1.61247000 | 3.68041200 |
| C | 4.78748300 | -1.81487600 | 1.04610500 |
| C | 4.09836600 | -2.37899000 | 2.15456700 |
| C | 4.66602400 | -2.29194200 | 3.47596100 |

|   |            |             |             |
|---|------------|-------------|-------------|
| C | 2.80044000 | -2.90318000 | 1.98162600  |
| H | 2.31166600 | -3.39057900 | 2.82753900  |
| C | 2.14155300 | -2.75689400 | 0.78135500  |
| C | 2.70631000 | -1.99039300 | -0.25667000 |
| C | 4.02092200 | -1.51484700 | -0.11962600 |
| H | 6.20519200 | -1.44595900 | 4.68837700  |
| H | 9.73154300 | 0.08920700  | 1.93407100  |
| H | 8.17528800 | -0.36991900 | 3.83555900  |
| H | 9.16995400 | -0.77675200 | -0.31283800 |
| H | 4.09589900 | -2.70471000 | 4.31065100  |
| H | 1.13809900 | -3.17037800 | 0.65778400  |
| C | 7.03416800 | -2.17565600 | -1.11299300 |
| C | 7.68692000 | -3.55311700 | -0.92899800 |
| C | 7.62566700 | -1.46681000 | -2.33214100 |
| H | 5.97396200 | -2.36296000 | -1.31489500 |
| H | 7.23664300 | -4.09799700 | -0.08600300 |
| H | 7.55942200 | -4.15970200 | -1.83855600 |
| H | 8.76537600 | -3.45047000 | -0.73206700 |
| H | 7.23630900 | -0.44398800 | -2.44693800 |
| H | 8.72301900 | -1.41108700 | -2.27155700 |
| H | 7.36951800 | -2.02283100 | -3.24429200 |
| C | 1.84045400 | -1.70954400 | -1.49333700 |
| C | 2.51132600 | -0.67065100 | -2.41121400 |
| H | 1.75999100 | -2.66339100 | -2.04043600 |
| H | 2.01690700 | -0.62096800 | -3.38997000 |
| C | 4.49347200 | -0.45414500 | -1.13367000 |
| H | 5.56166100 | -0.24706600 | -1.08389500 |
| C | 3.99237500 | -0.94528900 | -2.47883100 |
| O | 4.61424600 | -1.45653600 | -3.37021200 |
| C | 3.59191000 | 0.74318700  | -0.86889600 |
| C | 3.89180100 | 1.65656900  | 0.24953200  |
| C | 2.90835800 | 2.01216700  | 1.18562600  |
| C | 5.20104100 | 2.13213700  | 0.42963300  |
| C | 3.21921300 | 2.85115100  | 2.25397500  |
| H | 1.90041800 | 1.60585900  | 1.08798600  |
| C | 5.50964600 | 2.97077100  | 1.49840400  |
| H | 5.98257900 | 1.84952800  | -0.27938500 |
| C | 4.51827500 | 3.33661000  | 2.41042800  |
| H | 2.44415000 | 3.11635100  | 2.97518900  |
| H | 6.53036200 | 3.33696100  | 1.62121100  |
| H | 4.76093500 | 3.99052200  | 3.24985400  |
| C | 1.12258300 | 1.18528800  | -1.44241800 |
| C | 0.97723100 | 2.65443900  | -1.35382800 |
| C | 0.09909900 | 3.26005100  | -0.44561000 |

|   |             |             |             |
|---|-------------|-------------|-------------|
| C | 1.80465100  | 3.49133300  | -2.12598600 |
| C | 0.01842500  | 4.64597400  | -0.31866200 |
| H | -0.51386400 | 2.63750800  | 0.20980200  |
| C | 1.73141100  | 4.87003500  | -2.01677400 |
| H | 2.51499100  | 3.04638000  | -2.82574900 |
| C | 0.83546200  | 5.46240800  | -1.11149300 |
| H | -0.66841300 | 5.07563900  | 0.40924400  |
| H | 2.36594400  | 5.52023400  | -2.62049800 |
| C | 0.11038600  | 0.26286700  | -1.39681600 |
| C | 0.39020900  | -1.22546800 | -1.16952700 |
| C | -1.28695100 | 0.64632100  | -1.52057800 |
| C | -0.64373000 | -2.09938800 | -1.87714200 |
| H | 0.22002400  | -1.36549400 | -0.09101200 |
| C | -2.31311700 | -0.22918500 | -1.58921900 |
| H | -1.51351600 | 1.70768200  | -1.63160000 |
| C | -2.05516300 | -1.67381900 | -1.60790300 |
| H | -0.52078800 | -2.03675800 | -2.97354000 |
| H | -3.33789300 | 0.11253300  | -1.73860800 |
| O | 0.83528600  | 6.80634900  | -1.06185500 |
| O | -2.03372100 | -1.97196000 | 0.33425600  |
| C | -0.03841500 | 7.44709100  | -0.15854000 |
| H | 0.18497300  | 7.16609500  | 0.88299000  |
| H | 0.12007200  | 8.52430500  | -0.28196800 |
| H | -1.09080500 | 7.20895400  | -0.38096900 |
| C | -2.14347600 | -3.33873100 | 0.68215800  |
| H | -2.63000400 | -3.43507400 | 1.66367700  |
| H | -2.74118000 | -3.88856200 | -0.06393600 |
| H | -1.13912200 | -3.77970200 | 0.74142900  |
| C | 2.45821200  | 0.59877600  | -1.59394600 |
| H | -0.52722700 | -3.15687600 | -1.59977300 |
| O | -2.97310000 | -2.48445100 | -1.99763200 |
| H | -3.95000600 | -2.10072600 | -1.82432500 |
| P | -5.45532400 | -1.09761200 | -0.06113100 |
| O | -6.12714300 | 0.37277700  | -0.25578100 |
| O | -5.19359700 | -1.59442900 | -1.46661500 |
| O | -4.31560300 | -1.07562300 | 0.91758700  |
| H | -2.90876700 | -1.52731800 | 0.60260800  |
| O | -6.65790900 | -1.92841600 | 0.65042500  |
| C | -6.85722300 | 1.01135100  | 0.72297100  |
| C | -6.46486700 | 1.00194500  | 2.06179300  |
| C | -8.01893100 | 1.66899400  | 0.31735000  |
| C | -7.26498500 | 1.65059700  | 3.00379100  |
| H | -5.54835100 | 0.48655900  | 2.35228800  |
| C | -8.80308900 | 2.31828900  | 1.26780700  |

|   |              |             |             |
|---|--------------|-------------|-------------|
| H | -8.29560600  | 1.64863600  | -0.73790300 |
| C | -8.43257600  | 2.30682900  | 2.61444800  |
| H | -6.96598700  | 1.64165300  | 4.05344500  |
| H | -9.71462300  | 2.82979800  | 0.95377300  |
| H | -9.05227100  | 2.81019200  | 3.35792900  |
| C | -7.97728400  | -1.85231500 | 0.25886700  |
| C | -8.93369100  | -1.77283700 | 1.27131900  |
| C | -8.34952700  | -1.84950600 | -1.08553300 |
| C | -10.28139900 | -1.68081100 | 0.93160200  |
| H | -8.60310000  | -1.77228600 | 2.31111200  |
| C | -9.70324000  | -1.74917800 | -1.41053900 |
| H | -7.58320700  | -1.91909100 | -1.85868700 |
| C | -10.67079000 | -1.66289300 | -0.40954000 |
| H | -11.03122100 | -1.61405700 | 1.72184400  |
| H | -9.99974000  | -1.74135900 | -2.46090500 |
| H | -11.72652600 | -1.58397100 | -0.67292700 |

**Int a5**

|   |            |             |             |
|---|------------|-------------|-------------|
| C | 8.37782500 | -0.03432600 | 1.97360600  |
| C | 7.44500600 | -0.15349800 | 2.98204700  |
| C | 6.19931400 | -0.76635900 | 2.72602300  |
| C | 5.85936400 | -1.18062500 | 1.40650200  |
| C | 6.90850800 | -1.24554400 | 0.43539900  |
| C | 8.12287900 | -0.63334700 | 0.72919400  |
| C | 5.31942700 | -1.07459400 | 3.82655500  |
| C | 4.46806300 | -1.58924400 | 1.17100400  |
| C | 3.70417900 | -2.02610400 | 2.28786200  |
| C | 4.18167500 | -1.78139400 | 3.62523600  |
| C | 2.41694700 | -2.56598500 | 2.08982000  |
| H | 1.86569300 | -2.94365000 | 2.95342100  |
| C | 1.83701300 | -2.56535600 | 0.83959900  |
| C | 2.48033200 | -1.92999400 | -0.24165500 |
| C | 3.78309800 | -1.43094400 | -0.06969300 |
| H | 5.63544200 | -0.78943600 | 4.83209700  |
| H | 9.33773700 | 0.45081500  | 2.15839900  |
| H | 7.66065300 | 0.19581600  | 3.99393700  |
| H | 8.92524500 | -0.66308900 | -0.01009000 |
| H | 3.55581300 | -2.09786500 | 4.46211800  |
| H | 0.83064900 | -2.97286500 | 0.71124800  |
| C | 6.84623700 | -2.15784000 | -0.78922000 |
| C | 7.47736200 | -3.50691700 | -0.41647100 |
| C | 7.52126600 | -1.58144700 | -2.03430200 |
| H | 5.80118300 | -2.36723800 | -1.04189300 |
| H | 6.96910700 | -3.95946700 | 0.44790600  |

|   |             |             |             |
|---|-------------|-------------|-------------|
| H | 7.40707600  | -4.20740800 | -1.26256900 |
| H | 8.54101000  | -3.38251600 | -0.16021000 |
| H | 7.14219000  | -0.57924800 | -2.28411700 |
| H | 8.61210700  | -1.51411900 | -1.90605000 |
| H | 7.32632900  | -2.23326500 | -2.89692700 |
| C | 1.71818700  | -1.80504200 | -1.56950800 |
| C | 2.41709600  | -0.80654200 | -2.51452600 |
| H | 1.73710500  | -2.80488000 | -2.03411900 |
| H | 1.98026600  | -0.83749400 | -3.52135900 |
| C | 4.31486200  | -0.45864600 | -1.14541200 |
| H | 5.37515300  | -0.22809900 | -1.04559800 |
| C | 3.90231900  | -1.05938700 | -2.47362100 |
| O | 4.58205600  | -1.63587900 | -3.27919200 |
| C | 3.38068600  | 0.73514400  | -1.01928500 |
| C | 3.60764600  | 1.71173500  | 0.06375200  |
| C | 2.60491800  | 2.01260300  | 0.99746100  |
| C | 4.87899000  | 2.28574500  | 0.22381900  |
| C | 2.85910700  | 2.89356200  | 2.04721800  |
| H | 1.63013200  | 1.52888200  | 0.91391900  |
| C | 5.12984500  | 3.16895300  | 1.27161900  |
| H | 5.67525600  | 2.04043800  | -0.48289800 |
| C | 4.11897100  | 3.47793100  | 2.18342300  |
| H | 2.07116200  | 3.11419800  | 2.76948900  |
| H | 6.12090800  | 3.61277500  | 1.38014300  |
| H | 4.31720800  | 4.16493500  | 3.00796500  |
| C | 0.92954400  | 1.05685600  | -1.68723900 |
| C | 0.74132700  | 2.52109800  | -1.59621600 |
| C | -0.15341800 | 3.09863600  | -0.68592200 |
| C | 1.54990800  | 3.38276400  | -2.36050400 |
| C | -0.26675900 | 4.48085300  | -0.54827800 |
| H | -0.75060000 | 2.45758900  | -0.03389100 |
| C | 1.44371000  | 4.75862100  | -2.24110300 |
| H | 2.27309600  | 2.95987800  | -3.06079000 |
| C | 0.53254100  | 5.32266100  | -1.33305200 |
| H | -0.96386500 | 4.88792900  | 0.18285700  |
| H | 2.06440900  | 5.42817600  | -2.83794700 |
| C | -0.05963600 | 0.10644100  | -1.65959300 |
| C | 0.23193100  | -1.37504000 | -1.43443900 |
| C | -1.46515900 | 0.44151300  | -1.77761700 |
| C | -0.68083900 | -2.25253700 | -2.29169100 |
| H | -0.08737300 | -1.56055600 | -0.39825300 |
| C | -2.44774100 | -0.48501800 | -1.91579100 |
| H | -1.74824900 | 1.49485300  | -1.79347100 |
| C | -2.12777100 | -1.89218000 | -2.12294400 |

|   |              |             |             |
|---|--------------|-------------|-------------|
| H | -0.44595300  | -2.12853600 | -3.36573900 |
| H | -3.49109700  | -0.17584100 | -2.00118600 |
| O | 0.50068800   | 6.66548600  | -1.27241300 |
| O | -1.57681200  | -3.04989600 | 0.50012900  |
| C | -0.38553800  | 7.27830100  | -0.36172100 |
| H | -0.15300500  | 6.99345600  | 0.67676800  |
| H | -0.25210600  | 8.35986900  | -0.47631100 |
| H | -1.43269100  | 7.01766200  | -0.58375500 |
| C | -1.99718300  | -4.37744300 | 0.32325500  |
| H | -2.59835400  | -4.74197200 | 1.17501900  |
| H | -2.59158300  | -4.50688200 | -0.59862300 |
| H | -1.10607000  | -5.01844800 | 0.24592900  |
| C | 2.28666100   | 0.51044200  | -1.78561500 |
| H | -0.55812300  | -3.31381600 | -2.03883200 |
| O | -3.00549200  | -2.75021600 | -2.26995800 |
| H | -4.33258000  | -2.38651200 | -1.88916400 |
| P | -5.20732600  | -1.53910800 | -0.05680400 |
| O | -5.50206600  | 0.03734400  | -0.27104600 |
| O | -5.26853700  | -2.08769000 | -1.51286900 |
| O | -3.99039300  | -1.84621200 | 0.73020600  |
| H | -2.38157600  | -2.51288500 | 0.62937600  |
| O | -6.51588900  | -2.06202500 | 0.71851100  |
| C | -5.90275400  | 0.87691700  | 0.75418600  |
| C | -5.33478200  | 0.80344400  | 2.02472600  |
| C | -6.90697700  | 1.79672000  | 0.45728100  |
| C | -5.80542400  | 1.66208800  | 3.01987600  |
| H | -4.54170900  | 0.08163400  | 2.22572200  |
| C | -7.35968900  | 2.65185300  | 1.45899300  |
| H | -7.32639000  | 1.81800500  | -0.54974300 |
| C | -6.81550300  | 2.58302300  | 2.74373900  |
| H | -5.37165100  | 1.60738700  | 4.01976000  |
| H | -8.14964300  | 3.37067700  | 1.23520300  |
| H | -7.17792900  | 3.24902300  | 3.52804000  |
| C | -7.79764500  | -1.57689800 | 0.52092500  |
| C | -8.53146100  | -1.24878100 | 1.65889000  |
| C | -8.32754700  | -1.42098000 | -0.75788600 |
| C | -9.82133400  | -0.74414200 | 1.51034500  |
| H | -8.07546600  | -1.38229300 | 2.64096900  |
| C | -9.61852600  | -0.90726500 | -0.89084600 |
| H | -7.73434400  | -1.69418100 | -1.63193200 |
| C | -10.36576100 | -0.56612800 | 0.23656900  |
| H | -10.40060100 | -0.48089200 | 2.39689000  |
| H | -10.04060000 | -0.77678400 | -1.88872300 |
| H | -11.37374300 | -0.16457600 | 0.12347400  |



**Int1cr'**

|   |             |             |             |
|---|-------------|-------------|-------------|
| C | -1.27367500 | 4.10954300  | 0.31502600  |
| C | 0.06639100  | 4.29947700  | 0.58026000  |
| C | 1.03329500  | 3.57453300  | -0.14848400 |
| C | 0.62794000  | 2.57590300  | -1.07637100 |
| C | -0.74131000 | 2.54412300  | -1.49205600 |
| C | -1.65929400 | 3.28364300  | -0.75419200 |
| C | 2.42511700  | 3.94590900  | -0.06306300 |
| C | 1.68123400  | 1.74804500  | -1.66730100 |
| C | 3.00224600  | 2.27191300  | -1.72217200 |
| C | 3.34350300  | 3.40531400  | -0.90230900 |
| C | 3.99336000  | 1.62121900  | -2.49477300 |
| H | 4.98918900  | 2.06467400  | -2.55451600 |
| C | 3.70155000  | 0.44916000  | -3.15299200 |
| C | 2.46415300  | -0.19213400 | -2.91434500 |
| C | 1.49098900  | 0.41351300  | -2.11032700 |
| H | 2.70397600  | 4.74098000  | 0.63262900  |
| H | -2.03299800 | 4.65543800  | 0.87778900  |
| H | 0.39926200  | 5.03179800  | 1.31896000  |
| H | -2.71336600 | 3.24920100  | -1.02763900 |
| H | 4.37551100  | 3.76110800  | -0.91476600 |
| H | 4.44274400  | -0.04023000 | -3.78788300 |
| C | -1.16442200 | 1.95226200  | -2.84028800 |
| C | -0.50391100 | 2.76452200  | -3.96586000 |
| C | -2.67520800 | 1.91427700  | -3.06198800 |
| H | -0.80749400 | 0.92037200  | -2.93636700 |
| H | 0.59337900  | 2.75355200  | -3.89561900 |
| H | -0.78665400 | 2.35332400  | -4.94669700 |
| H | -0.83811100 | 3.81310700  | -3.92562400 |
| H | -3.18212700 | 1.36907400  | -2.25592200 |
| H | -3.10088500 | 2.92771600  | -3.12777900 |
| H | -2.89050800 | 1.40642500  | -4.01358300 |
| C | 2.21599600  | -1.51435600 | -3.47363800 |
| C | 1.10503100  | -2.23692000 | -3.21208900 |
| H | 2.97172700  | -1.91201700 | -4.15681000 |
| H | 0.90806200  | -3.20096600 | -3.68242600 |
| C | 0.45342500  | -0.49027700 | -1.47908200 |
| H | -0.48022100 | 0.01190500  | -1.18704900 |
| C | 0.10234700  | -1.72250600 | -2.28792300 |
| O | -0.95176400 | -2.32738100 | -2.10751500 |
| C | 1.04763200  | -1.03859100 | -0.14657100 |
| C | 0.14478600  | -1.83563000 | 0.74571900  |
| C | -0.64460500 | -1.19116900 | 1.70522900  |

|   |             |             |             |
|---|-------------|-------------|-------------|
| C | 0.10301900  | -3.23163700 | 0.64341100  |
| C | -1.46282000 | -1.93694300 | 2.55342800  |
| H | -0.62801300 | -0.10139100 | 1.76836000  |
| C | -0.72128100 | -3.97389400 | 1.48819600  |
| H | 0.72515200  | -3.73444100 | -0.10094100 |
| C | -1.50444000 | -3.32741300 | 2.44488400  |
| H | -2.07766000 | -1.42737700 | 3.29680900  |
| H | -0.74771000 | -5.06156700 | 1.40101500  |
| H | -2.14929500 | -3.90799000 | 3.10740800  |
| C | 3.50120200  | -0.54627300 | 0.67484400  |
| C | 4.62552100  | -1.48230000 | 0.38526100  |
| C | 5.69500300  | -1.63308300 | 1.27409200  |
| C | 4.61201900  | -2.29123300 | -0.76525500 |
| C | 6.72547000  | -2.54424500 | 1.03309500  |
| H | 5.72822800  | -1.03988600 | 2.18943500  |
| C | 5.62619300  | -3.20021200 | -1.01887200 |
| H | 3.78421500  | -2.19763400 | -1.47047600 |
| C | 6.69898500  | -3.33323900 | -0.12212400 |
| H | 7.53661400  | -2.63217700 | 1.75484000  |
| H | 5.61600000  | -3.82277900 | -1.91480200 |
| C | 3.72606500  | 0.68887600  | 1.48409100  |
| C | 2.71493500  | 1.19738100  | 2.30544100  |
| C | 4.93227200  | 1.40725400  | 1.40384300  |
| C | 2.87931000  | 2.38130700  | 3.02463900  |
| H | 1.77200100  | 0.65219800  | 2.38886100  |
| C | 5.11271900  | 2.58397300  | 2.11614400  |
| H | 5.73703400  | 1.04734800  | 0.75963800  |
| C | 4.08454800  | 3.08697000  | 2.92787300  |
| H | 2.06414800  | 2.74055600  | 3.65176100  |
| H | 6.04424500  | 3.14794200  | 2.04735600  |
| O | 7.64709700  | -4.23347800 | -0.44836600 |
| O | 4.33530100  | 4.24809700  | 3.56653600  |
| C | 8.74317800  | -4.39770800 | 0.42281100  |
| H | 8.41793300  | -4.73838200 | 1.41899800  |
| H | 9.38744600  | -5.16270400 | -0.02523700 |
| H | 9.31536700  | -3.46204600 | 0.53017100  |
| C | 3.32736600  | 4.79069600  | 4.38884700  |
| H | 3.72881400  | 5.72233600  | 4.80351000  |
| H | 2.41525300  | 5.01632400  | 3.81248500  |
| H | 3.07112900  | 4.10880600  | 5.21564600  |
| C | 2.28384800  | -0.80311500 | 0.22409600  |
| P | -3.44145000 | -0.79321300 | -0.14948200 |
| O | -4.08883500 | -0.89478600 | 1.32250500  |
| O | -2.47962600 | 0.32400100  | -0.23483500 |

|   |             |             |             |
|---|-------------|-------------|-------------|
| O | -2.92950000 | -2.22010400 | -0.52755300 |
| H | -2.09284100 | -2.21651800 | -1.10954500 |
| O | -4.75247300 | -0.64544900 | -1.09475300 |
| C | -5.25074700 | -1.57930000 | 1.62849100  |
| C | -5.46106600 | -2.88969700 | 1.20321600  |
| C | -6.20245800 | -0.90061100 | 2.38800100  |
| C | -6.66140100 | -3.51925300 | 1.53704300  |
| H | -4.69713400 | -3.40215700 | 0.61730300  |
| C | -7.39239300 | -1.54466700 | 2.71888000  |
| H | -5.99973900 | 0.12592600  | 2.69716000  |
| C | -7.62776700 | -2.85287100 | 2.29022100  |
| H | -6.83634000 | -4.54358700 | 1.20372500  |
| H | -8.14314200 | -1.01662000 | 3.30915600  |
| H | -8.56328600 | -3.35278200 | 2.54522800  |
| C | -5.75295100 | 0.27315500  | -0.84383300 |
| C | -7.05901000 | -0.13085700 | -1.11683200 |
| C | -5.47976100 | 1.54248600  | -0.33284800 |
| C | -8.10932800 | 0.74953200  | -0.86813700 |
| H | -7.23078700 | -1.13476000 | -1.50800600 |
| C | -6.54395700 | 2.41067600  | -0.08323800 |
| H | -4.44898500 | 1.83874900  | -0.12828200 |
| C | -7.85661300 | 2.02043800  | -0.34689800 |
| H | -9.13358100 | 0.43594400  | -1.07669000 |
| H | -6.33765200 | 3.40320400  | 0.32112500  |
| H | -8.68216000 | 2.70519700  | -0.14795900 |

**TS-b1**

|   |             |             |             |
|---|-------------|-------------|-------------|
| C | -1.66992500 | 4.02035400  | 0.15136600  |
| C | -0.35319000 | 4.18388700  | 0.52388100  |
| C | 0.65879300  | 3.46218800  | -0.14758300 |
| C | 0.31268600  | 2.45581500  | -1.09316600 |
| C | -1.02496800 | 2.44022700  | -1.60686900 |
| C | -1.98129200 | 3.20965000  | -0.95528900 |
| C | 2.03431600  | 3.86877500  | -0.01387000 |
| C | 1.40282900  | 1.67603600  | -1.67506200 |
| C | 2.68265900  | 2.28311700  | -1.73510600 |
| C | 2.97872100  | 3.38775300  | -0.86322400 |
| C | 3.66905400  | 1.78137600  | -2.62863800 |
| H | 4.62907700  | 2.29646900  | -2.69638700 |
| C | 3.38255200  | 0.70493100  | -3.42455400 |
| C | 2.20181800  | -0.05008900 | -3.17973100 |
| C | 1.27433300  | 0.35018100  | -2.20009100 |
| H | 2.27481700  | 4.65493400  | 0.70560300  |
| H | -2.46156500 | 4.58135000  | 0.65160900  |

|   |             |             |             |
|---|-------------|-------------|-------------|
| H | -0.06680800 | 4.90958300  | 1.28830200  |
| H | -3.00429000 | 3.22053100  | -1.33065500 |
| H | 3.99430000  | 3.78859100  | -0.86349800 |
| H | 4.08352100  | 0.35642100  | -4.18548400 |
| C | -1.35194400 | 1.82784700  | -2.97052500 |
| C | -0.64505900 | 2.63913500  | -4.06785100 |
| C | -2.84361900 | 1.74172200  | -3.28149300 |
| H | -0.96545700 | 0.80384100  | -3.01637400 |
| H | 0.44489100  | 2.67010500  | -3.92464200 |
| H | -0.84615400 | 2.19752800  | -5.05569600 |
| H | -1.01685200 | 3.67586600  | -4.07548400 |
| H | -3.37960900 | 1.17384100  | -2.51066700 |
| H | -3.30440300 | 2.73732000  | -3.37286500 |
| H | -2.98561900 | 1.22679000  | -4.24305200 |
| C | 1.96823600  | -1.27513000 | -3.89158500 |
| C | 0.93942400  | -2.10881100 | -3.57919600 |
| H | 2.63884500  | -1.52316600 | -4.71840700 |
| H | 0.74255000  | -3.02540900 | -4.13515600 |
| C | 0.36597300  | -0.67615100 | -1.59603200 |
| H | -0.97566000 | -0.28010100 | -1.18681400 |
| C | 0.17387300  | -1.87222200 | -2.39339000 |
| O | -0.61846000 | -2.84105800 | -2.06425100 |
| C | 0.88306300  | -1.04686500 | -0.18422400 |
| C | 0.12634800  | -1.93286000 | 0.76313200  |
| C | -0.68320000 | -1.37268300 | 1.75596000  |
| C | 0.29873200  | -3.32356900 | 0.72204400  |
| C | -1.33501200 | -2.19237300 | 2.67780800  |
| H | -0.81873200 | -0.28935400 | 1.78872100  |
| C | -0.35538100 | -4.14025200 | 1.64128600  |
| H | 0.95138000  | -3.76185000 | -0.03563700 |
| C | -1.17704600 | -3.57607800 | 2.61979800  |
| H | -1.97489700 | -1.74479500 | 3.44091400  |
| H | -0.21745900 | -5.22212800 | 1.59866800  |
| H | -1.69108900 | -4.21603800 | 3.33943700  |
| C | 3.25947000  | -0.35493300 | 0.72133800  |
| C | 4.43182700  | -1.23240100 | 0.43266200  |
| C | 5.44636200  | -1.42651800 | 1.37561000  |
| C | 4.52226400  | -1.93398300 | -0.78275100 |
| C | 6.51818800  | -2.28770800 | 1.13123700  |
| H | 5.40049400  | -0.90713700 | 2.33475000  |
| C | 5.57970100  | -2.79201700 | -1.04056700 |
| H | 3.74466000  | -1.79235200 | -1.53715500 |
| C | 6.59123700  | -2.97733300 | -0.08440200 |
| H | 7.28315000  | -2.41468700 | 1.89630700  |

|   |             |             |             |
|---|-------------|-------------|-------------|
| H | 5.65195400  | -3.33210700 | -1.98578400 |
| C | 3.41236700  | 0.86346500  | 1.56658000  |
| C | 2.34947500  | 1.31889400  | 2.35283800  |
| C | 4.59792100  | 1.61908700  | 1.56024600  |
| C | 2.44037400  | 2.49271800  | 3.10080000  |
| H | 1.42301200  | 0.74058000  | 2.38017300  |
| C | 4.70561400  | 2.78722300  | 2.30105300  |
| H | 5.44336700  | 1.29749500  | 0.94854700  |
| C | 3.62370700  | 3.24051700  | 3.07139400  |
| H | 1.58657800  | 2.81191900  | 3.69742500  |
| H | 5.62021700  | 3.38212500  | 2.28827500  |
| O | 7.58487800  | -3.82558300 | -0.41740200 |
| O | 3.80465900  | 4.39750300  | 3.74092100  |
| C | 8.61663900  | -4.04859300 | 0.51645700  |
| H | 8.22633500  | -4.48082900 | 1.45196100  |
| H | 9.30920700  | -4.76106000 | 0.05397000  |
| H | 9.15898700  | -3.11754700 | 0.74771600  |
| C | 2.73740900  | 4.89637200  | 4.51425600  |
| H | 3.08563900  | 5.83446900  | 4.96125200  |
| H | 1.85069200  | 5.10110800  | 3.89204900  |
| H | 2.45924100  | 4.19546200  | 5.31764300  |
| C | 2.07452700  | -0.67201500 | 0.22508000  |
| P | -3.08033400 | -1.13385700 | -0.41821300 |
| O | -3.54198300 | -0.82585600 | 1.09540800  |
| O | -2.05786000 | -0.03945500 | -0.74559100 |
| O | -2.63893300 | -2.54420300 | -0.66820800 |
| H | -1.37047900 | -2.67918200 | -1.36901500 |
| O | -4.44737200 | -0.89027600 | -1.24964400 |
| C | -4.60653400 | -1.45015300 | 1.71854900  |
| C | -4.86148300 | -2.81153200 | 1.55716800  |
| C | -5.40970400 | -0.65260900 | 2.53307000  |
| C | -5.95619900 | -3.37135800 | 2.21853400  |
| H | -4.21120400 | -3.41670300 | 0.92427500  |
| C | -6.49425600 | -1.22832700 | 3.19021700  |
| H | -5.17513800 | 0.40818100  | 2.63220500  |
| C | -6.77375800 | -2.58760700 | 3.03188200  |
| H | -6.16462100 | -4.43538400 | 2.09461500  |
| H | -7.12774900 | -0.60763000 | 3.82606700  |
| H | -7.62694500 | -3.03472900 | 3.54391900  |
| C | -5.41857500 | 0.03570900  | -0.92045700 |
| C | -6.74339100 | -0.33590800 | -1.13737300 |
| C | -5.09465600 | 1.28612200  | -0.39470900 |
| C | -7.76100700 | 0.56180500  | -0.81934800 |
| H | -6.95612600 | -1.32602300 | -1.54253300 |

|   |             |            |             |
|---|-------------|------------|-------------|
| C | -6.12343600 | 2.17350000 | -0.07953100 |
| H | -4.05005100 | 1.55325800 | -0.22314400 |
| C | -7.45601400 | 1.81655800 | -0.28873500 |
| H | -8.80069000 | 0.27398000 | -0.98370400 |
| H | -5.87478700 | 3.15199200 | 0.33572700  |
| H | -8.25600700 | 2.51444200 | -0.03800300 |

**Int b1**

|   |             |             |             |
|---|-------------|-------------|-------------|
| C | -3.11189600 | 2.17218000  | 1.94663900  |
| C | -2.44814100 | 2.92296600  | 1.00759900  |
| C | -2.05588100 | 2.33761900  | -0.22048400 |
| C | -2.25788500 | 0.94589700  | -0.45640600 |
| C | -3.13482200 | 0.23559400  | 0.43871000  |
| C | -3.49970900 | 0.85578000  | 1.62556300  |
| C | -1.55765800 | 3.18088300  | -1.26809200 |
| C | -1.69741100 | 0.38550100  | -1.67978100 |
| C | -1.48038500 | 1.27140600  | -2.75792100 |
| C | -1.39290300 | 2.68271500  | -2.52179900 |
| C | -1.35014500 | 0.76960000  | -4.09277400 |
| H | -1.27232100 | 1.48755000  | -4.91161900 |
| C | -1.37261200 | -0.57018300 | -4.32800700 |
| C | -1.28973500 | -1.48769300 | -3.23244100 |
| C | -1.33323900 | -1.01092800 | -1.89025900 |
| H | -1.41120400 | 4.24294000  | -1.05722600 |
| H | -3.41405600 | 2.60835900  | 2.90027100  |
| H | -2.23729100 | 3.98156400  | 1.17325200  |
| H | -4.14901700 | 0.33301100  | 2.32660400  |
| H | -1.13979700 | 3.33321600  | -3.36150600 |
| H | -1.34138400 | -0.96760200 | -5.34444000 |
| C | -3.85287400 | -1.04756700 | 0.01813500  |
| C | -4.68547800 | -0.79330300 | -1.24927200 |
| C | -4.77002100 | -1.62187200 | 1.09707000  |
| H | -3.11462500 | -1.82158700 | -0.22303400 |
| H | -4.07274500 | -0.46648400 | -2.10046500 |
| H | -5.20992100 | -1.71433600 | -1.54545900 |
| H | -5.44283400 | -0.01682900 | -1.05702100 |
| H | -4.24770100 | -1.78180000 | 2.04980300  |
| H | -5.63079100 | -0.96040000 | 1.28324000  |
| H | -5.16330400 | -2.59312400 | 0.76156400  |
| C | -1.01633600 | -2.85432100 | -3.49053400 |
| C | -0.63781200 | -3.69855000 | -2.48019300 |
| H | -1.05036600 | -3.20974600 | -4.52232200 |
| H | -0.36629500 | -4.73860100 | -2.66451000 |
| C | -0.86067300 | -1.88206400 | -0.85203700 |

|   |             |             |             |
|---|-------------|-------------|-------------|
| C | -0.47769800 | -3.18324300 | -1.17443500 |
| O | 0.12256000  | -4.01550600 | -0.29342800 |
| C | -0.47527300 | -1.38823200 | 0.52038400  |
| C | -1.10259500 | -1.90495700 | 1.77430100  |
| C | -0.89577300 | -1.22734100 | 2.98804400  |
| C | -1.86643800 | -3.08090300 | 1.78920700  |
| C | -1.42349400 | -1.71681000 | 4.17746900  |
| H | -0.32511700 | -0.29619400 | 2.98440100  |
| C | -2.38328600 | -3.57954500 | 2.98693700  |
| H | -2.06957000 | -3.61778900 | 0.86072700  |
| C | -2.16557400 | -2.90210700 | 4.18393600  |
| H | -1.25732000 | -1.16958800 | 5.10703300  |
| H | -2.97022700 | -4.49963300 | 2.97505000  |
| H | -2.57614000 | -3.28870000 | 5.11816300  |
| C | 1.65731700  | 0.15583400  | 0.42719000  |
| C | 2.99799000  | -0.48436400 | 0.29524300  |
| C | 4.16671800  | 0.22087300  | 0.59617700  |
| C | 3.12383000  | -1.82084600 | -0.12824700 |
| C | 5.42683700  | -0.37286800 | 0.49040200  |
| H | 4.10234800  | 1.25833100  | 0.92950100  |
| C | 4.36562000  | -2.42259500 | -0.23752300 |
| H | 2.22880000  | -2.39537500 | -0.37764700 |
| C | 5.53298100  | -1.70316200 | 0.07113000  |
| H | 6.31272000  | 0.21046400  | 0.73836700  |
| H | 4.46437700  | -3.45671100 | -0.57067800 |
| C | 1.55368300  | 1.64693000  | 0.40752100  |
| C | 0.97645200  | 2.34817600  | 1.46479800  |
| C | 2.05270400  | 2.37587800  | -0.68718400 |
| C | 0.88278200  | 3.74311400  | 1.44861700  |
| H | 0.58898700  | 1.79795600  | 2.32509900  |
| C | 1.95914700  | 3.75743800  | -0.72123600 |
| H | 2.51131200  | 1.84458900  | -1.52428300 |
| C | 1.36676700  | 4.45383300  | 0.34664100  |
| H | 0.42441300  | 4.25595200  | 2.29327300  |
| H | 2.32920900  | 4.32971600  | -1.57326900 |
| O | 6.69800400  | -2.36524200 | -0.06658300 |
| O | 1.30381700  | 5.79551600  | 0.22236900  |
| C | 7.89595200  | -1.68394000 | 0.22984000  |
| H | 7.92296700  | -1.35684600 | 1.28169100  |
| H | 8.71176500  | -2.39432700 | 0.05428300  |
| H | 8.03321800  | -0.80803100 | -0.42455100 |
| C | 0.71368300  | 6.53666900  | 1.26543700  |
| H | 0.76112700  | 7.59031500  | 0.96771700  |
| H | -0.34068400 | 6.25182800  | 1.41496900  |

|   |            |             |            |
|---|------------|-------------|------------|
| H | 1.26013900 | 6.40428900  | 2.21312300 |
| C | 0.56976400 | -0.58121400 | 0.54571900 |
| H | 0.27741600 | -3.57619200 | 0.55651800 |

**TS-b2**

|   |             |             |             |
|---|-------------|-------------|-------------|
| C | 2.77805800  | 2.61819100  | -1.45304400 |
| C | 2.22130300  | 3.13770500  | -0.30645800 |
| C | 1.97477000  | 2.29892800  | 0.80305600  |
| C | 2.20254400  | 0.89225800  | 0.71646300  |
| C | 2.99850600  | 0.41923000  | -0.38429700 |
| C | 3.21539500  | 1.28170400  | -1.45467000 |
| C | 1.63225900  | 2.89276800  | 2.06454900  |
| C | 1.78616400  | 0.06999000  | 1.85109200  |
| C | 1.70131300  | 0.70540600  | 3.11293200  |
| C | 1.61819600  | 2.13748600  | 3.19206400  |
| C | 1.66526400  | -0.06372400 | 4.31433500  |
| H | 1.68751200  | 0.46118700  | 5.27103900  |
| C | 1.61737500  | -1.42639200 | 4.25254400  |
| C | 1.41163800  | -2.07922700 | 3.00502000  |
| C | 1.40971600  | -1.33414500 | 1.78942300  |
| H | 1.47636500  | 3.97327500  | 2.10158700  |
| H | 2.96443700  | 3.25201900  | -2.32189400 |
| H | 1.99057800  | 4.20195100  | -0.21625300 |
| H | 3.79561700  | 0.93710700  | -2.30991800 |
| H | 1.47962400  | 2.59124600  | 4.17553800  |
| H | 1.62930400  | -2.03206600 | 5.16144300  |
| C | 3.82752000  | -0.86144800 | -0.28144600 |
| C | 4.80360400  | -0.75019400 | 0.90147700  |
| C | 4.62040500  | -1.17924300 | -1.54828500 |
| H | 3.17205200  | -1.71645800 | -0.07505100 |
| H | 4.28408100  | -0.61994700 | 1.86093300  |
| H | 5.41519600  | -1.66254100 | 0.96989500  |
| H | 5.48201700  | 0.10586700  | 0.75967200  |
| H | 3.98869000  | -1.18754700 | -2.44743300 |
| H | 5.42866400  | -0.44758800 | -1.70530500 |
| H | 5.08394900  | -2.17222300 | -1.45213500 |
| C | 1.06342800  | -3.46241900 | 2.98621500  |
| C | 0.54074900  | -4.05622600 | 1.87617100  |
| H | 1.15746200  | -4.02718300 | 3.91720600  |
| H | 0.19457800  | -5.09115000 | 1.88348900  |
| C | 0.93882600  | -1.99247100 | 0.61433400  |
| C | 0.29976700  | -3.28839300 | 0.67983200  |
| O | -0.50946200 | -3.67049000 | -0.21751500 |
| C | 0.56050500  | -1.34892300 | -0.65391900 |



|   |             |             |             |
|---|-------------|-------------|-------------|
| C | 1.17088400  | -1.73466400 | -1.93027400 |
| C | 0.95241300  | -0.94065000 | -3.06904500 |
| C | 1.92048200  | -2.91914100 | -2.04001200 |
| C | 1.49406900  | -1.31284600 | -4.29372300 |
| H | 0.37237200  | -0.02188800 | -2.97293100 |
| C | 2.41438100  | -3.31394400 | -3.27786000 |
| H | 2.09324100  | -3.53569300 | -1.15693200 |
| C | 2.21220400  | -2.50760700 | -4.40068800 |
| H | 1.34362100  | -0.68222800 | -5.17075600 |
| H | 2.97163900  | -4.24732400 | -3.36670100 |
| H | 2.61754000  | -2.81203200 | -5.36734900 |
| C | -1.74714400 | -0.02054000 | -0.45233800 |
| C | -3.16198700 | -0.44767800 | -0.28811900 |
| C | -4.20666100 | 0.45600400  | -0.51136300 |
| C | -3.49839100 | -1.76081300 | 0.09796700  |
| C | -5.54405300 | 0.07953800  | -0.37652000 |
| H | -3.97967500 | 1.48208900  | -0.80619800 |
| C | -4.82015200 | -2.14772900 | 0.23476300  |
| H | -2.71292800 | -2.49295900 | 0.30291900  |
| C | -5.85927000 | -1.23118700 | -0.00208700 |
| H | -6.32529200 | 0.81483900  | -0.56418300 |
| H | -5.08099200 | -3.16223300 | 0.53928500  |
| C | -1.44297000 | 1.43965200  | -0.38751400 |
| C | -1.07399800 | 2.14958700  | -1.53010900 |
| C | -1.60245500 | 2.14067600  | 0.81925500  |
| C | -0.83764800 | 3.52564400  | -1.48448600 |
| H | -0.98975700 | 1.62820100  | -2.48562600 |
| C | -1.35938900 | 3.50376100  | 0.88076900  |
| H | -1.90940100 | 1.60355800  | 1.71972500  |
| C | -0.95678300 | 4.20407400  | -0.26783800 |
| H | -0.54505400 | 4.04743300  | -2.39494200 |
| H | -1.45645300 | 4.05327600  | 1.81830300  |
| O | -7.11276300 | -1.69290100 | 0.16040700  |
| O | -0.69201900 | 5.51718300  | -0.10491100 |
| C | -8.18847500 | -0.80593400 | -0.05090200 |
| H | -8.20322900 | -0.43203500 | -1.08717200 |
| H | -9.10525300 | -1.37573400 | 0.13811300  |
| H | -8.14548200 | 0.04944100  | 0.64222400  |
| C | -0.31289000 | 6.26839900  | -1.23596000 |
| H | -0.15069600 | 7.29560200  | -0.89014900 |
| H | 0.62058100  | 5.88645800  | -1.68058300 |
| H | -1.10406000 | 6.26613500  | -2.00307900 |
| C | -0.77465000 | -0.91298600 | -0.64618900 |
| H | -1.01584100 | -2.09605400 | -0.68132300 |

**Int b2**

|   |             |             |             |
|---|-------------|-------------|-------------|
| C | 2.65798400  | 2.45716200  | 2.31871400  |
| C | 3.59507800  | 1.48084800  | 2.59169300  |
| C | 3.90727400  | 0.51178800  | 1.61267500  |
| C | 3.19201000  | 0.49497800  | 0.38664700  |
| C | 2.39895500  | 1.62753900  | 0.03248600  |
| C | 2.11516300  | 2.55952700  | 1.02400900  |
| C | 5.01797200  | -0.39176700 | 1.79350700  |
| C | 3.39427000  | -0.64840700 | -0.49413700 |
| C | 4.60165500  | -1.38503200 | -0.38450400 |
| C | 5.41785900  | -1.21543500 | 0.79028100  |
| C | 4.92456700  | -2.35241100 | -1.36524500 |
| H | 5.87173400  | -2.88961900 | -1.28676100 |
| C | 4.05628800  | -2.59994900 | -2.40530300 |
| C | 2.76831600  | -2.01710200 | -2.40699300 |
| C | 2.39346300  | -1.13137600 | -1.38176500 |
| H | 5.57998700  | -0.33481300 | 2.72839100  |
| H | 2.39999200  | 3.20092700  | 3.07484800  |
| H | 4.12192700  | 1.45714000  | 3.54802400  |
| H | 1.50396300  | 3.42993000  | 0.77516500  |
| H | 6.31838500  | -1.82530000 | 0.88717400  |
| H | 4.32073400  | -3.29820200 | -3.20191800 |
| C | 2.12706800  | 1.98942200  | -1.42681200 |
| C | 3.21795600  | 2.97257800  | -1.87680400 |
| C | 0.74239900  | 2.56410500  | -1.70104200 |
| H | 2.24241900  | 1.09394100  | -2.04712600 |
| H | 4.22406000  | 2.55332000  | -1.72610500 |
| H | 3.09994700  | 3.20989500  | -2.94516500 |
| H | 3.15201700  | 3.91320000  | -1.30758100 |
| H | -0.04983700 | 1.87444700  | -1.38151300 |
| H | 0.59610400  | 3.53058500  | -1.19428100 |
| H | 0.62214800  | 2.74091400  | -2.78109400 |
| C | 1.81797000  | -2.32972900 | -3.46775500 |
| C | 0.59133400  | -1.77502600 | -3.52387800 |
| H | 2.16031700  | -2.99393700 | -4.26550400 |
| H | -0.08734800 | -1.94113300 | -4.36243300 |
| C | 0.93417300  | -0.89359300 | -1.20366300 |
| C | 0.10255100  | -0.88493000 | -2.45193700 |
| O | -0.94537800 | -0.27818800 | -2.56321600 |
| C | 0.30313900  | -1.11064400 | -0.00405800 |
| C | 1.04058000  | -1.55784900 | 1.22422400  |
| C | 1.91139500  | -2.65777200 | 1.19831200  |
| C | 0.80039000  | -0.92064300 | 2.44764000  |

|   |             |             |             |
|---|-------------|-------------|-------------|
| C | 2.55470200  | -3.07815600 | 2.36050800  |
| H | 2.08518000  | -3.18767700 | 0.25932500  |
| C | 1.45338300  | -1.33301200 | 3.60912200  |
| H | 0.10513400  | -0.08251800 | 2.48853100  |
| C | 2.33728400  | -2.41006800 | 3.56763900  |
| H | 3.23012500  | -3.93496300 | 2.32249700  |
| H | 1.26624900  | -0.80992700 | 4.54855600  |
| H | 2.84798400  | -2.73798800 | 4.47484000  |
| C | -2.21210300 | -0.43450800 | 0.03756500  |
| C | -2.12158400 | 1.04400800  | -0.10103400 |
| C | -1.53776200 | 1.82600600  | 0.89506200  |
| C | -2.73519000 | 1.70199000  | -1.18338300 |
| C | -1.53773600 | 3.22372000  | 0.82782100  |
| H | -1.09349100 | 1.34588500  | 1.76711000  |
| C | -2.72370000 | 3.08282900  | -1.27741800 |
| H | -3.20402400 | 1.10906700  | -1.97017700 |
| C | -2.11947000 | 3.85804200  | -0.27129400 |
| H | -1.07801900 | 3.79632400  | 1.63257500  |
| H | -3.17668300 | 3.59733300  | -2.12632300 |
| C | -3.59200100 | -0.99005300 | 0.12681200  |
| C | -4.63826100 | -0.24874200 | 0.69019200  |
| C | -3.89315500 | -2.27641100 | -0.36006300 |
| C | -5.93041100 | -0.76418800 | 0.79793500  |
| H | -4.44243000 | 0.75644300  | 1.06876700  |
| C | -5.17212300 | -2.80135800 | -0.26522800 |
| H | -3.11148500 | -2.86388100 | -0.84567900 |
| C | -6.20494900 | -2.05112700 | 0.32001900  |
| H | -6.71093400 | -0.15585000 | 1.25307300  |
| H | -5.40664400 | -3.79336800 | -0.65413700 |
| O | -2.14427100 | 5.19514100  | -0.44999600 |
| O | -7.41768200 | -2.63551600 | 0.36944400  |
| C | -1.54367500 | 6.01023900  | 0.52931400  |
| H | -0.46792900 | 5.79157000  | 0.63183100  |
| H | -1.66723400 | 7.04662200  | 0.19489600  |
| H | -2.03038200 | 5.88744200  | 1.51037900  |
| C | -8.48941300 | -1.91229200 | 0.93157500  |
| H | -9.37075800 | -2.56081200 | 0.87033700  |
| H | -8.29748900 | -1.66419000 | 1.98784200  |
| H | -8.68541800 | -0.98347400 | 0.37191700  |
| C | -1.15935700 | -1.27239100 | 0.16508300  |
| H | -1.39540500 | -2.29368600 | 0.49075100  |

**TS-b3**

|   |            |            |            |
|---|------------|------------|------------|
| C | 2.92359600 | 2.57907300 | 2.15088400 |
|---|------------|------------|------------|

|   |             |             |             |
|---|-------------|-------------|-------------|
| C | 3.91139400  | 1.62895000  | 2.28106400  |
| C | 4.07410500  | 0.64207800  | 1.28104900  |
| C | 3.15864900  | 0.57267300  | 0.19589500  |
| C | 2.30003300  | 1.69646200  | -0.05050500 |
| C | 2.17204300  | 2.64252600  | 0.95944900  |
| C | 5.22283000  | -0.22522900 | 1.29890800  |
| C | 3.24897500  | -0.58767800 | -0.68061500 |
| C | 4.49548400  | -1.25196100 | -0.77575500 |
| C | 5.48302400  | -1.04655600 | 0.24801800  |
| C | 4.73178800  | -2.16864700 | -1.83619800 |
| H | 5.71753200  | -2.62932700 | -1.92512900 |
| C | 3.73827700  | -2.44008400 | -2.73996000 |
| C | 2.41838800  | -1.96570000 | -2.51389900 |
| C | 2.13584600  | -1.13465600 | -1.40661100 |
| H | 5.92399200  | -0.13701900 | 2.13165700  |
| H | 2.77745100  | 3.33730700  | 2.92224000  |
| H | 4.59382200  | 1.63502100  | 3.13385600  |
| H | 1.51008300  | 3.49648100  | 0.81384400  |
| H | 6.41028200  | -1.62095500 | 0.19573600  |
| H | 3.92105800  | -3.09090500 | -3.59753100 |
| C | 1.74760700  | 1.98720900  | -1.44892400 |
| C | 2.89853500  | 2.06131800  | -2.46557800 |
| C | 0.94153000  | 3.27903100  | -1.53687900 |
| H | 1.07543300  | 1.17563400  | -1.75500600 |
| H | 3.47416200  | 1.12854200  | -2.52986400 |
| H | 2.49795900  | 2.27973300  | -3.46686200 |
| H | 3.59266200  | 2.87257500  | -2.19321500 |
| H | 0.09564200  | 3.28120100  | -0.84020700 |
| H | 1.56688200  | 4.16193900  | -1.32816700 |
| H | 0.53891500  | 3.38859200  | -2.55455200 |
| C | 1.34329100  | -2.39689000 | -3.36814500 |
| C | 0.05993200  | -2.04113900 | -3.12619600 |
| H | 1.59218400  | -3.01481000 | -4.23434500 |
| H | -0.75802900 | -2.33293500 | -3.78663800 |
| C | 0.74199000  | -0.96746800 | -0.98843200 |
| C | -0.30333700 | -1.21979500 | -1.97852600 |
| O | -1.49533600 | -0.86430700 | -1.85763600 |
| C | 0.34191300  | -1.04335000 | 0.37649000  |
| C | 1.27917100  | -1.47465400 | 1.46128800  |
| C | 2.15660300  | -2.55990000 | 1.32285400  |
| C | 1.22522900  | -0.80252800 | 2.68956400  |
| C | 2.97783000  | -2.94157900 | 2.38102900  |
| H | 2.19001600  | -3.11208300 | 0.38133400  |
| C | 2.05339600  | -1.17957200 | 3.74721100  |

|   |             |             |             |
|---|-------------|-------------|-------------|
| H | 0.53971800  | 0.04026700  | 2.80361100  |
| C | 2.93579500  | -2.24752600 | 3.59342800  |
| H | 3.65452900  | -3.78957000 | 2.25984600  |
| H | 2.00913200  | -0.63362300 | 4.69135800  |
| H | 3.58599900  | -2.54647300 | 4.41764900  |
| C | -2.07104800 | -0.38745900 | 0.12808000  |
| C | -2.03218600 | 1.07959300  | -0.12717900 |
| C | -1.60985000 | 1.91906100  | 0.90753900  |
| C | -2.62683400 | 1.66624000  | -1.26043300 |
| C | -1.78650800 | 3.30454200  | 0.84454300  |
| H | -1.16912000 | 1.48000300  | 1.80463500  |
| C | -2.78400500 | 3.03868600  | -1.34760600 |
| H | -2.96449400 | 1.02399400  | -2.07415800 |
| C | -2.37519700 | 3.87167000  | -0.28951200 |
| H | -1.45641200 | 3.92257900  | 1.67849800  |
| H | -3.23049200 | 3.50272400  | -2.22834200 |
| C | -3.41576700 | -0.99934400 | 0.22929400  |
| C | -4.57990900 | -0.23930700 | 0.40271300  |
| C | -3.54605400 | -2.40149500 | 0.16042800  |
| C | -5.83248100 | -0.84080900 | 0.51966600  |
| H | -4.51485500 | 0.84748900  | 0.47310300  |
| C | -4.78195600 | -3.01204800 | 0.26702500  |
| H | -2.65628800 | -3.01157200 | -0.00731600 |
| C | -5.94084300 | -2.23547400 | 0.44968000  |
| H | -6.71209900 | -0.21598400 | 0.66755700  |
| H | -4.88837000 | -4.09563700 | 0.20038500  |
| O | -2.57289800 | 5.19218700  | -0.45899400 |
| O | -7.09959900 | -2.90789500 | 0.54123000  |
| C | -2.12803800 | 6.07094300  | 0.54992400  |
| H | -1.03933900 | 5.98777000  | 0.70126800  |
| H | -2.36719700 | 7.08490500  | 0.21008500  |
| H | -2.64166600 | 5.88005400  | 1.50577600  |
| C | -8.29542200 | -2.17640400 | 0.70566300  |
| H | -9.10719800 | -2.91129900 | 0.74519300  |
| H | -8.28565300 | -1.59785400 | 1.64299600  |
| H | -8.46617800 | -1.49345000 | -0.14149800 |
| C | -1.00812400 | -1.04046700 | 0.77279500  |
| H | -1.26555400 | -1.72721300 | 1.58422600  |

**TS-c1**

|   |             |             |             |
|---|-------------|-------------|-------------|
| C | -2.01851600 | -0.18825800 | -4.14024100 |
| C | -1.55882100 | -1.46255400 | -3.88628000 |
| C | -2.00264300 | -2.15868800 | -2.74136500 |
| C | -2.85423200 | -1.52358700 | -1.79250700 |

|   |             |             |             |
|---|-------------|-------------|-------------|
| C | -3.47715600 | -0.28974200 | -2.17281000 |
| C | -3.01477400 | 0.35739500  | -3.31364600 |
| C | -1.65931100 | -3.54950900 | -2.58523200 |
| C | -3.13300000 | -2.25127400 | -0.54900200 |
| C | -2.95314100 | -3.66394000 | -0.53490900 |
| C | -2.19607600 | -4.29229600 | -1.58553900 |
| C | -3.44663100 | -4.43332100 | 0.54548500  |
| H | -3.32713800 | -5.51792700 | 0.51376500  |
| C | -4.07579400 | -3.82244800 | 1.60586600  |
| C | -4.07634800 | -2.41291800 | 1.69758300  |
| C | -3.51732200 | -1.63767300 | 0.67489500  |
| H | -1.01846900 | -4.00705200 | -3.34215000 |
| H | -1.67226600 | 0.36463900  | -5.01543100 |
| H | -0.86726300 | -1.96036200 | -4.56948500 |
| H | -3.47846200 | 1.30152400  | -3.60782000 |
| H | -2.01805200 | -5.36758200 | -1.52248000 |
| H | -4.51665600 | -4.40987400 | 2.41363000  |
| C | -4.78717900 | 0.22341500  | -1.56762300 |
| C | -5.93679500 | -0.16473200 | -2.50821900 |
| C | -4.81148700 | 1.73149200  | -1.30018600 |
| H | -4.98120700 | -0.29614100 | -0.62210400 |
| H | -5.95603900 | -1.25020200 | -2.68590600 |
| H | -6.90266300 | 0.13010200  | -2.07053600 |
| H | -5.83353900 | 0.33920800  | -3.48156300 |
| H | -3.98804900 | 2.06431400  | -0.64946300 |
| H | -4.75748300 | 2.30471000  | -2.23834900 |
| H | -5.75543800 | 2.00425000  | -0.80479800 |
| C | -4.69008600 | -1.75222300 | 2.84976800  |
| C | -4.73273100 | -0.41361700 | 3.00143600  |
| H | -5.17588000 | -2.39999500 | 3.58465500  |
| H | -5.25652600 | 0.06300200  | 3.83163000  |
| C | -3.15101000 | -0.20674300 | 1.00733600  |
| H | -3.11253200 | 0.43824800  | 0.12931400  |
| C | -4.05109500 | 0.46794700  | 2.04207400  |
| O | -4.11392100 | 1.67910100  | 2.10319900  |
| C | -1.71538000 | -0.18696100 | 1.58343900  |
| C | -1.50180000 | -0.71896200 | 2.96415600  |
| C | -1.61768800 | 0.12524900  | 4.07575000  |
| C | -1.20393200 | -2.07250900 | 3.15912700  |
| C | -1.44855400 | -0.38097900 | 5.36378800  |
| H | -1.84881500 | 1.18272900  | 3.92681900  |
| C | -1.03840400 | -2.57812100 | 4.44904500  |
| H | -1.10743000 | -2.73105300 | 2.29204800  |
| C | -1.16515800 | -1.73456000 | 5.55294200  |

|   |             |             |             |
|---|-------------|-------------|-------------|
| H | -1.53786600 | 0.28558600  | 6.22335700  |
| H | -0.80663700 | -3.63532600 | 4.59040300  |
| H | -1.03558100 | -2.13033200 | 6.56179800  |
| C | -0.49192100 | 0.91656200  | -0.35648300 |
| C | 0.39573500  | 0.30112200  | -1.33613500 |
| C | 1.15356500  | 1.05400500  | -2.25333700 |
| C | 0.63080300  | -1.09433400 | -1.27649000 |
| C | 2.06997800  | 0.45280900  | -3.10583400 |
| H | 1.07278800  | 2.14056100  | -2.26362100 |
| C | 1.53825200  | -1.70460500 | -2.11317800 |
| H | 0.07174200  | -1.70010500 | -0.55955500 |
| C | 2.27203800  | -0.93499100 | -3.03770000 |
| H | 2.65256100  | 1.07161400  | -3.78648100 |
| H | 1.72072700  | -2.77922200 | -2.07035400 |
| C | -1.05625300 | 2.25180500  | -0.52835100 |
| C | -1.44298700 | 3.00886000  | 0.59419500  |
| C | -1.32592700 | 2.78787100  | -1.81029300 |
| C | -2.06142200 | 4.24430300  | 0.46309400  |
| H | -1.22171600 | 2.63061600  | 1.59234300  |
| C | -1.95766300 | 4.00692900  | -1.95343400 |
| H | -1.08531700 | 2.21072200  | -2.70161200 |
| C | -2.33225600 | 4.75075500  | -0.81818000 |
| H | -2.33065400 | 4.80316800  | 1.35780900  |
| H | -2.19416800 | 4.40908500  | -2.93932400 |
| O | 3.14799100  | -1.60209700 | -3.79297300 |
| O | -2.93568500 | 5.92039900  | -1.04871700 |
| C | 3.94496100  | -0.88554200 | -4.71453200 |
| H | 4.56723100  | -0.13521500 | -4.20319000 |
| H | 4.59321600  | -1.62214400 | -5.20149400 |
| H | 3.32224200  | -0.38845200 | -5.47447600 |
| C | -3.35261400 | 6.70386800  | 0.05295000  |
| H | -3.82603400 | 7.59841400  | -0.36586500 |
| H | -4.08275200 | 6.16035900  | 0.67213600  |
| H | -2.49472300 | 7.00329600  | 0.67441900  |
| C | -0.67897100 | 0.24315100  | 0.85731400  |
| P | 2.70325300  | 0.76540800  | 1.12360500  |
| O | 3.45855400  | 0.26979000  | -0.23655700 |
| O | 2.17614400  | 2.12812300  | 0.88667800  |
| O | 1.73892200  | -0.32933600 | 1.61262500  |
| H | 0.56889000  | -0.04712700 | 1.32684200  |
| O | 3.92186400  | 0.66806500  | 2.20850900  |
| C | 4.29152300  | -0.81079000 | -0.35351500 |
| C | 4.10054900  | -1.99431900 | 0.36303300  |
| C | 5.35422100  | -0.68181500 | -1.25040000 |

|   |            |             |             |
|---|------------|-------------|-------------|
| C | 4.99461300 | -3.04948500 | 0.17428000  |
| H | 3.25998100 | -2.08038400 | 1.05269300  |
| C | 6.23259700 | -1.74684300 | -1.43484400 |
| H | 5.47838800 | 0.26436000  | -1.78014800 |
| C | 6.05818600 | -2.93462000 | -0.72138500 |
| H | 4.84998300 | -3.97505300 | 0.73465900  |
| H | 7.06344900 | -1.64419100 | -2.13542800 |
| H | 6.74920900 | -3.76686700 | -0.86265800 |
| C | 5.17893300 | 1.15858600  | 1.94197400  |
| C | 6.26522900 | 0.37214000  | 2.32768700  |
| C | 5.37175500 | 2.38729500  | 1.30758600  |
| C | 7.55939100 | 0.81975900  | 2.07163500  |
| H | 6.07581400 | -0.58544100 | 2.81525000  |
| C | 6.67355500 | 2.81870900  | 1.05024600  |
| H | 4.50451400 | 2.98405400  | 1.02088700  |
| C | 7.76874600 | 2.04128200  | 1.42803800  |
| H | 8.40971200 | 0.20442200  | 2.37089800  |
| H | 6.82866100 | 3.77690800  | 0.55093700  |
| H | 8.78320200 | 2.38658900  | 1.22336800  |

**Int c1**

|   |             |             |            |
|---|-------------|-------------|------------|
| C | -3.02915800 | -0.39732200 | 2.23152600 |
| C | -2.68620400 | -1.71539500 | 2.01230900 |
| C | -1.32815000 | -2.08102600 | 1.89586900 |
| C | -0.31214800 | -1.08345700 | 1.89639800 |
| C | -0.66476000 | 0.24039300  | 2.31470900 |
| C | -2.01403100 | 0.55110900  | 2.44239600 |
| C | -0.96466700 | -3.47627000 | 1.89001800 |
| C | 1.05885300  | -1.52328600 | 1.62640700 |
| C | 1.39128300  | -2.88716600 | 1.85792000 |
| C | 0.33448400  | -3.85769500 | 1.98056400 |
| C | 2.74785300  | -3.28944500 | 1.88365200 |
| H | 2.98198800  | -4.33217200 | 2.10647800 |
| C | 3.74931400  | -2.37670300 | 1.64216500 |
| C | 3.41645200  | -1.08095500 | 1.18744600 |
| C | 2.07743900  | -0.68967300 | 1.09228400 |
| H | -1.76843800 | -4.21557600 | 1.90691100 |
| H | -4.07665400 | -0.10372600 | 2.32251300 |
| H | -3.44835500 | -2.49596300 | 1.96166100 |
| H | -2.29481000 | 1.55567300  | 2.76713100 |
| H | 0.60822800  | -4.90875700 | 2.09102000 |
| H | 4.80045900  | -2.66141800 | 1.71697300 |
| C | 0.34266700  | 1.24011900  | 2.88962600 |
| C | 0.24777400  | 1.18998300  | 4.42090100 |



|   |             |             |             |
|---|-------------|-------------|-------------|
| C | 0.16325000  | 2.67758300  | 2.39600000  |
| H | 1.35999500  | 0.91956500  | 2.63634000  |
| H | 0.40439100  | 0.16774400  | 4.79566800  |
| H | 1.01060300  | 1.84302600  | 4.87102400  |
| H | -0.74132000 | 1.53167900  | 4.76283700  |
| H | 0.24771300  | 2.76488800  | 1.30238500  |
| H | -0.81302600 | 3.08815000  | 2.69589900  |
| H | 0.93943300  | 3.31942400  | 2.83912700  |
| C | 4.47336600  | -0.14131600 | 0.81587400  |
| C | 4.23260700  | 1.09736400  | 0.34227800  |
| H | 5.50294400  | -0.47038400 | 0.97995700  |
| H | 5.03422000  | 1.80712300  | 0.13260400  |
| C | 1.74617900  | 0.49812400  | 0.19922500  |
| H | 0.83830900  | 1.01670600  | 0.50954000  |
| C | 2.85864500  | 1.54902600  | 0.08785400  |
| O | 2.59234100  | 2.68060300  | -0.26014900 |
| C | 1.48899800  | -0.08505800 | -1.19476500 |
| C | 2.63082900  | -0.74618100 | -1.90023000 |
| C | 3.45793400  | 0.01030700  | -2.73991900 |
| C | 2.87697200  | -2.11378300 | -1.73876300 |
| C | 4.52521900  | -0.59494900 | -3.40205900 |
| H | 3.26756400  | 1.07880800  | -2.86910600 |
| C | 3.94660500  | -2.71600500 | -2.40137000 |
| H | 2.23510900  | -2.70343100 | -1.07858400 |
| C | 4.77325700  | -1.95751100 | -3.23066800 |
| H | 5.16516800  | 0.00194300  | -4.05392000 |
| H | 4.13384600  | -3.78272800 | -2.26679600 |
| H | 5.61038400  | -2.42983300 | -3.74743000 |
| C | -1.00619900 | 0.42034800  | -1.38237700 |
| C | -2.12793700 | -0.47977700 | -1.43779400 |
| C | -3.45645500 | -0.04009100 | -1.66190000 |
| C | -1.90829700 | -1.88048800 | -1.31885800 |
| C | -4.51586100 | -0.92755600 | -1.70644300 |
| H | -3.65319600 | 1.01189000  | -1.86858000 |
| C | -2.95302900 | -2.77204000 | -1.35514200 |
| H | -0.89654500 | -2.25340600 | -1.14851600 |
| C | -4.27510600 | -2.30535100 | -1.53209800 |
| H | -5.51988200 | -0.55494900 | -1.90241700 |
| H | -2.79214400 | -3.84371000 | -1.23320000 |
| C | -1.12645900 | 1.80351900  | -1.04865300 |
| C | -0.14917400 | 2.73311300  | -1.49801400 |
| C | -2.22069700 | 2.31378400  | -0.28450900 |
| C | -0.25891000 | 4.08464900  | -1.24050600 |
| H | 0.68891700  | 2.38070200  | -2.09759200 |

|   |             |             |             |
|---|-------------|-------------|-------------|
| C | -2.33228400 | 3.65263400  | -0.01344200 |
| H | -2.94751900 | 1.62425600  | 0.14065800  |
| C | -1.35439300 | 4.55944600  | -0.49191100 |
| H | 0.50434300  | 4.76529900  | -1.61305000 |
| H | -3.14701400 | 4.04580300  | 0.59524800  |
| O | -5.22517600 | -3.22823200 | -1.53970800 |
| O | -1.54253900 | 5.83009600  | -0.18459700 |
| C | -6.58061800 | -2.83551200 | -1.69467700 |
| H | -6.73761900 | -2.34765600 | -2.66787200 |
| H | -7.17245700 | -3.75507700 | -1.64669300 |
| H | -6.88527800 | -2.15764400 | -0.88370900 |
| C | -0.58942300 | 6.80105700  | -0.59573100 |
| H | -0.95308200 | 7.76220700  | -0.21929300 |
| H | 0.39780300  | 6.58335200  | -0.16299300 |
| H | -0.51915300 | 6.83623700  | -1.69254700 |
| C | 0.28195800  | -0.13681500 | -1.80085400 |
| H | 0.23020600  | -0.73815100 | -2.71448100 |

**TS-c2**

|   |             |             |             |
|---|-------------|-------------|-------------|
| C | -3.19639300 | 2.87691200  | -1.92906700 |
| C | -3.94550700 | 1.75992800  | -2.24111300 |
| C | -3.96978800 | 0.65973900  | -1.35809300 |
| C | -3.13463700 | 0.65281600  | -0.20595700 |
| C | -2.51430100 | 1.87628700  | 0.19903900  |
| C | -2.54435400 | 2.94842400  | -0.68721900 |
| C | -4.93739400 | -0.39467000 | -1.54281400 |
| C | -3.09722000 | -0.57945600 | 0.57997800  |
| C | -4.20004500 | -1.47167000 | 0.50406200  |
| C | -5.12369900 | -1.34677600 | -0.59302500 |
| C | -4.32063500 | -2.52590800 | 1.44227000  |
| H | -5.20228300 | -3.16822400 | 1.40077900  |
| C | -3.34334100 | -2.72923100 | 2.38840200  |
| C | -2.13141600 | -2.00405600 | 2.29997900  |
| C | -1.97722700 | -1.00037200 | 1.33957100  |
| H | -5.58099600 | -0.35115400 | -2.42403100 |
| H | -3.17541400 | 3.73490300  | -2.60336100 |
| H | -4.56115400 | 1.72912100  | -3.14232600 |
| H | -2.08803600 | 3.89494100  | -0.39004100 |
| H | -5.92938000 | -2.07872700 | -0.67725000 |
| H | -3.44983800 | -3.50037900 | 3.15356800  |
| C | -2.09942300 | 2.15593400  | 1.64788200  |
| C | -3.25109100 | 2.91377100  | 2.32453600  |
| C | -0.79140600 | 2.93239000  | 1.81788500  |
| H | -1.99681900 | 1.20639600  | 2.18724800  |

|   |             |             |             |
|---|-------------|-------------|-------------|
| H | -4.19734300 | 2.35991200  | 2.23701200  |
| H | -3.03473500 | 3.06202300  | 3.39320200  |
| H | -3.39042600 | 3.90297400  | 1.86168600  |
| H | 0.08308800  | 2.39031800  | 1.42715700  |
| H | -0.82831100 | 3.91220700  | 1.31699700  |
| H | -0.61555100 | 3.11759800  | 2.88792100  |
| C | -1.02783500 | -2.31014400 | 3.19552300  |
| C | 0.19983600  | -1.74601000 | 3.10101000  |
| H | -1.22577800 | -3.02707600 | 3.99698400  |
| H | 1.00428100  | -1.97212800 | 3.80043600  |
| C | -0.57734600 | -0.57546900 | 0.95755900  |
| H | -0.50687100 | 0.50888100  | 0.80174100  |
| C | 0.50950400  | -0.89199100 | 1.97407500  |
| O | 1.64970500  | -0.48473000 | 1.76068700  |
| C | -0.11363400 | -1.21714700 | -0.36494300 |
| C | -1.00519500 | -2.17925500 | -1.07118800 |
| C | -1.30396900 | -3.42779800 | -0.50948000 |
| C | -1.56507200 | -1.82585300 | -2.30398600 |
| C | -2.16351100 | -4.30358800 | -1.16861700 |
| H | -0.85409100 | -3.71371200 | 0.44367500  |
| C | -2.42968700 | -2.70428300 | -2.95957200 |
| H | -1.33366900 | -0.85239600 | -2.74267200 |
| C | -2.73413000 | -3.94029800 | -2.39099200 |
| H | -2.38826900 | -5.27569200 | -0.72632200 |
| H | -2.86963100 | -2.41620700 | -3.91596200 |
| H | -3.41330600 | -4.62510900 | -2.90154600 |
| C | 2.12437600  | -0.07778600 | -0.26109800 |
| C | 1.90831600  | 1.35845700  | -0.33345700 |
| C | 2.77640900  | 2.28619200  | 0.28249600  |
| C | 0.85851300  | 1.87046400  | -1.13708900 |
| C | 2.58301700  | 3.65072700  | 0.16114600  |
| H | 3.61635100  | 1.94110400  | 0.88173900  |
| C | 0.69262400  | 3.22726200  | -1.31216300 |
| H | 0.18372800  | 1.18766800  | -1.65482900 |
| C | 1.53151700  | 4.13606600  | -0.64146600 |
| H | 3.25871100  | 4.33376100  | 0.67323600  |
| H | -0.09617200 | 3.62006500  | -1.95321800 |
| C | 3.49302200  | -0.63762900 | -0.14596200 |
| C | 4.00770000  | -1.38976800 | -1.21252900 |
| C | 4.32724800  | -0.41407200 | 0.97007500  |
| C | 5.31240500  | -1.87819900 | -1.19701700 |
| H | 3.40853300  | -1.57394600 | -2.10415000 |
| C | 5.61276000  | -0.91819300 | 1.00590100  |
| H | 3.94228600  | 0.11356000  | 1.84075300  |

|   |            |             |             |
|---|------------|-------------|-------------|
| C | 6.12683800 | -1.64767200 | -0.08210300 |
| H | 5.67840000 | -2.43598900 | -2.05757000 |
| H | 6.24917800 | -0.76871100 | 1.87882700  |
| O | 1.26819900 | 5.42618100  | -0.82122800 |
| O | 7.38647400 | -2.08399900 | 0.03539800  |
| C | 2.07717900 | 6.39669100  | -0.17647500 |
| H | 3.12392600 | 6.31692400  | -0.50563200 |
| H | 1.67599000 | 7.37265900  | -0.46826400 |
| H | 2.02187800 | 6.28945700  | 0.91726200  |
| C | 7.94943400 | -2.82954900 | -1.02576100 |
| H | 8.97140000 | -3.07967900 | -0.72114600 |
| H | 7.38525400 | -3.75850600 | -1.20236700 |
| H | 7.98147800 | -2.23806000 | -1.95399000 |
| C | 1.11899600 | -0.97600200 | -0.84885900 |
| H | 1.44993400 | -1.57367000 | -1.70248700 |

**Int c2**

|   |             |             |             |
|---|-------------|-------------|-------------|
| C | -3.12702700 | 1.96266900  | -2.72152900 |
| C | -4.05594800 | 0.95091000  | -2.57970900 |
| C | -4.16096000 | 0.26135300  | -1.35304400 |
| C | -3.25550900 | 0.55497300  | -0.29997000 |
| C | -2.49332000 | 1.75785400  | -0.36978400 |
| C | -2.40041900 | 2.40128800  | -1.59969100 |
| C | -5.25241300 | -0.64803800 | -1.10979200 |
| C | -3.24239800 | -0.35169100 | 0.84552800  |
| C | -4.42281900 | -1.09922000 | 1.12295700  |
| C | -5.44557100 | -1.19682600 | 0.11829700  |
| C | -4.53410500 | -1.84404800 | 2.32351300  |
| H | -5.47328100 | -2.35629600 | 2.53938100  |
| C | -3.47123000 | -1.92667200 | 3.18474100  |
| C | -2.21638400 | -1.39467600 | 2.79283800  |
| C | -2.07767500 | -0.67726900 | 1.58867800  |
| H | -5.96819700 | -0.81819200 | -1.91701100 |
| H | -3.02125400 | 2.48620300  | -3.67300800 |
| H | -4.73105600 | 0.68607700  | -3.39589500 |
| H | -1.80679300 | 3.31382400  | -1.68362200 |
| H | -6.32710700 | -1.80224200 | 0.33555100  |
| H | -3.54670500 | -2.45966100 | 4.13377500  |
| C | -2.08995900 | 2.50286000  | 0.90194500  |
| C | -3.26230300 | 3.41494800  | 1.29366500  |
| C | -0.80264700 | 3.31304100  | 0.78965300  |
| H | -1.97527800 | 1.78608000  | 1.72528800  |
| H | -4.18974000 | 2.83969100  | 1.43025100  |
| H | -3.03751800 | 3.93908600  | 2.23480000  |

|   |             |             |             |
|---|-------------|-------------|-------------|
| H | -3.43914800 | 4.16960000  | 0.51199000  |
| H | 0.04124600  | 2.69399800  | 0.45814100  |
| H | -0.90819900 | 4.14913500  | 0.08171800  |
| H | -0.54712900 | 3.74502000  | 1.76868200  |
| C | -1.07725500 | -1.60615800 | 3.63557300  |
| C | 0.20288400  | -1.25721100 | 3.29329200  |
| H | -1.25386600 | -2.08546600 | 4.60220500  |
| H | 1.05617200  | -1.44674000 | 3.94264900  |
| C | -0.68209700 | -0.42584000 | 1.05706000  |
| H | -0.53288200 | 0.65760500  | 0.87543100  |
| C | 0.42557500  | -0.76242800 | 1.99818300  |
| O | 1.64916200  | -0.64346900 | 1.61525900  |
| C | -0.31592700 | -1.08326800 | -0.30112000 |
| C | -1.30649900 | -1.75418000 | -1.18023200 |
| C | -2.15203300 | -2.76792200 | -0.70641100 |
| C | -1.34845900 | -1.40820500 | -2.53782600 |
| C | -3.02583200 | -3.41535600 | -1.57696100 |
| H | -2.11963500 | -3.05973600 | 0.34595600  |
| C | -2.22343100 | -2.05872600 | -3.40658200 |
| H | -0.70194200 | -0.60913300 | -2.90706700 |
| C | -3.06754700 | -3.05982400 | -2.92715000 |
| H | -3.67844800 | -4.20396400 | -1.19806300 |
| H | -2.25157900 | -1.77354800 | -4.45962500 |
| H | -3.75765100 | -3.56602300 | -3.60431600 |
| C | 2.01603300  | -0.36746700 | 0.20931700  |
| C | 2.10515100  | 1.13917000  | 0.02904500  |
| C | 2.56493400  | 1.95143800  | 1.06647500  |
| C | 1.83835000  | 1.71942700  | -1.21911700 |
| C | 2.73798600  | 3.32372700  | 0.88411100  |
| H | 2.79861900  | 1.51436700  | 2.03936300  |
| C | 2.01850900  | 3.08017700  | -1.41728000 |
| H | 1.49066000  | 1.10237900  | -2.04982500 |
| C | 2.46216900  | 3.89715900  | -0.36486100 |
| H | 3.08594000  | 3.93211700  | 1.71793400  |
| H | 1.81110500  | 3.54246900  | -2.38325400 |
| C | 3.35719200  | -1.06899900 | 0.03754900  |
| C | 4.50816700  | -0.40817400 | -0.38251000 |
| C | 3.42615700  | -2.44987700 | 0.28986300  |
| C | 5.71346600  | -1.09616500 | -0.55410200 |
| H | 4.48489200  | 0.66242900  | -0.59014200 |
| C | 4.61361900  | -3.14202400 | 0.13282900  |
| H | 2.53276200  | -2.98883400 | 0.61620000  |
| C | 5.77267500  | -2.46869800 | -0.29480200 |
| H | 6.59328400  | -0.54806300 | -0.88764000 |

|   |            |             |             |
|---|------------|-------------|-------------|
| H | 4.67652500 | -4.21293400 | 0.33012300  |
| O | 2.58960200 | 5.20601900  | -0.63952200 |
| O | 6.88063800 | -3.21766300 | -0.42768400 |
| C | 3.02184100 | 6.07305300  | 0.38717200  |
| H | 4.02689100 | 5.79979400  | 0.74560400  |
| H | 3.05500900 | 7.07837200  | -0.04701800 |
| H | 2.31916400 | 6.06830300  | 1.23574600  |
| C | 8.06832700 | -2.59322800 | -0.86560600 |
| H | 8.83429800 | -3.37550700 | -0.90891600 |
| H | 7.94329300 | -2.15352100 | -1.86789500 |
| H | 8.39166500 | -1.80920100 | -0.16261300 |
| C | 0.96716600 | -1.00679600 | -0.66661800 |
| H | 1.30806700 | -1.44694100 | -1.60483500 |

**Int c3**

|   |             |             |             |
|---|-------------|-------------|-------------|
| C | 0.75279600  | -4.68526300 | 0.60659700  |
| C | -0.45576900 | -5.03061200 | 1.17430200  |
| C | -1.64871500 | -4.48365500 | 0.65612900  |
| C | -1.59082400 | -3.49574300 | -0.36282700 |
| C | -0.37512400 | -3.33230300 | -1.09908100 |
| C | 0.77597800  | -3.90101500 | -0.56139900 |
| C | -2.92525300 | -5.02907300 | 1.04121800  |
| C | -2.84540400 | -2.84645400 | -0.72854700 |
| C | -4.05421100 | -3.57369300 | -0.53393400 |
| C | -4.06090000 | -4.68184100 | 0.37959200  |
| C | -5.24548600 | -3.16949000 | -1.19019100 |
| H | -6.14331500 | -3.77883700 | -1.07309000 |
| C | -5.24200300 | -2.05571400 | -1.98819900 |
| C | -4.11257500 | -1.19578800 | -1.97124700 |
| C | -2.95983800 | -1.51929700 | -1.22350300 |
| H | -2.94079000 | -5.80695400 | 1.80817500  |
| H | 1.68667800  | -5.09149100 | 0.99939200  |
| H | -0.51309500 | -5.75206900 | 1.99213400  |
| H | 1.72476900  | -3.77282700 | -1.07881200 |
| H | -5.00878500 | -5.18608500 | 0.57588300  |
| H | -6.11248300 | -1.77527000 | -2.58341800 |
| C | -0.37972900 | -2.85156500 | -2.55566100 |
| C | -1.27434700 | -3.78113900 | -3.39331200 |
| C | 1.00929200  | -2.80400400 | -3.18734800 |
| H | -0.79078400 | -1.83787800 | -2.63071400 |
| H | -2.31969000 | -3.78611100 | -3.05328500 |
| H | -1.26337400 | -3.46176700 | -4.44647000 |
| H | -0.89790700 | -4.81533100 | -3.34859200 |
| H | 1.69488300  | -2.18339500 | -2.60020500 |

|   |             |             |             |
|---|-------------|-------------|-------------|
| H | 1.43470700  | -3.81517300 | -3.28897600 |
| H | 0.93179900  | -2.37612400 | -4.19792200 |
| C | -4.11681300 | -0.00042600 | -2.75661500 |
| C | -3.12732300 | 0.94616900  | -2.69618200 |
| H | -4.96522100 | 0.16033500  | -3.42748000 |
| H | -3.15950500 | 1.86490000  | -3.28020500 |
| C | -1.98051900 | -0.41698000 | -0.89962700 |
| H | -0.91357300 | -0.65367900 | -1.21565500 |
| C | -2.18941000 | 0.83443400  | -1.65348500 |
| O | -1.51538100 | 1.90784400  | -1.37942800 |
| C | -1.72238200 | -0.08739500 | 0.58614000  |
| C | -1.80716500 | -1.10710600 | 1.66736400  |
| C | -3.03918000 | -1.62690700 | 2.08602400  |
| C | -0.63815100 | -1.45723500 | 2.35670700  |
| C | -3.09827300 | -2.49390500 | 3.17612200  |
| H | -3.95562600 | -1.33729100 | 1.56560300  |
| C | -0.70283800 | -2.33075500 | 3.44339900  |
| H | 0.31014500  | -1.01659600 | 2.03256900  |
| C | -1.93035200 | -2.85178500 | 3.85383600  |
| H | -4.06266700 | -2.88951200 | 3.50064200  |
| H | 0.21222800  | -2.60062600 | 3.97514000  |
| H | -1.98008500 | -3.53209400 | 4.70618500  |
| C | -1.21446800 | 2.31439700  | -0.00409800 |
| C | 0.17287000  | 2.93325100  | 0.00936300  |
| C | 0.97693400  | 3.00476200  | -1.11983400 |
| C | 0.64133800  | 3.48475700  | 1.21226000  |
| C | 2.23686300  | 3.61228500  | -1.06640600 |
| H | 0.64332800  | 2.55629600  | -2.05517300 |
| C | 1.89045200  | 4.07569800  | 1.28102500  |
| H | 0.01626700  | 3.45367300  | 2.10817200  |
| C | 2.70743800  | 4.13533800  | 0.13838400  |
| H | 2.85594400  | 3.62479400  | -1.96253500 |
| H | 2.26876200  | 4.49419600  | 2.21470300  |
| C | -2.28987200 | 3.36218000  | 0.31520000  |
| C | -3.44450700 | 3.03637400  | 1.02542500  |
| C | -2.16540800 | 4.66496600  | -0.19538200 |
| C | -4.45454000 | 3.97760900  | 1.24450400  |
| H | -3.57537900 | 2.03064400  | 1.42865300  |
| C | -3.16133400 | 5.60586600  | 0.00443200  |
| H | -1.27173800 | 4.94367700  | -0.75731800 |
| C | -4.31703800 | 5.27137200  | 0.73141500  |
| H | -5.33713900 | 3.68912700  | 1.81384900  |
| H | -3.06981400 | 6.61924500  | -0.38884700 |
| O | 3.91995800  | 4.70432400  | 0.30157800  |

|   |             |             |             |
|---|-------------|-------------|-------------|
| O | -5.22960600 | 6.24781600  | 0.88466300  |
| C | 4.78565600  | 4.76169600  | -0.80839700 |
| H | 4.35662600  | 5.37331200  | -1.61951800 |
| H | 5.71343800  | 5.23014700  | -0.45919900 |
| H | 5.01277500  | 3.75469400  | -1.19533200 |
| C | -6.40274200 | 5.96357700  | 1.61431300  |
| H | -6.99904800 | 6.88293300  | 1.61793900  |
| H | -6.98494300 | 5.15721100  | 1.14023700  |
| H | -6.16999700 | 5.67979200  | 2.65307100  |
| C | -1.31195000 | 1.13832900  | 0.91785500  |
| H | -1.07982000 | 1.35737300  | 1.96214700  |
| P | 1.97365400  | -0.16600000 | -0.43892000 |
| O | 3.06203400  | 0.76041600  | -1.27217000 |
| O | 1.88110800  | 0.23224200  | 0.99617500  |
| O | 0.79652800  | -0.26150500 | -1.36086100 |
| O | 2.77995900  | -1.61607100 | -0.54678500 |
| C | 4.32138300  | 1.05801500  | -0.84784900 |
| C | 4.60195500  | 1.45638300  | 0.46439500  |
| C | 5.34506500  | 0.99991700  | -1.79987100 |
| C | 5.91290700  | 1.77849600  | 0.81350500  |
| H | 3.78572000  | 1.50449100  | 1.18448900  |
| C | 6.65042300  | 1.32941800  | -1.43793800 |
| H | 5.09502300  | 0.68912900  | -2.81564700 |
| C | 6.94158300  | 1.71731300  | -0.12853000 |
| H | 6.12860600  | 2.08880900  | 1.83783900  |
| H | 7.44513300  | 1.27913100  | -2.18491700 |
| H | 7.96377200  | 1.97287000  | 0.15503200  |
| C | 3.65295000  | -2.06844500 | 0.40186000  |
| C | 3.21239700  | -2.39814000 | 1.68667200  |
| C | 4.99383900  | -2.24281200 | 0.04994800  |
| C | 4.12347900  | -2.89442400 | 2.61813600  |
| H | 2.16006300  | -2.26071600 | 1.93391900  |
| C | 5.89646900  | -2.74050400 | 0.98884600  |
| H | 5.31113500  | -1.97605600 | -0.95957700 |
| C | 5.46649200  | -3.06558800 | 2.27648400  |
| H | 3.77785500  | -3.14947600 | 3.62193800  |
| H | 6.94398800  | -2.87098400 | 0.71077600  |
| H | 6.17483700  | -3.45223400 | 3.01087200  |

**TS-c3**

|   |             |             |             |
|---|-------------|-------------|-------------|
| C | 0.84660500  | -4.70382700 | 0.65943900  |
| C | -0.36605200 | -5.04209100 | 1.22275400  |
| C | -1.55563000 | -4.49763800 | 0.69204900  |
| C | -1.48626100 | -3.51170700 | -0.32780000 |



|   |             |             |             |
|---|-------------|-------------|-------------|
| C | -0.26559500 | -3.35352000 | -1.05748600 |
| C | 0.87977800  | -3.92641800 | -0.51369900 |
| C | -2.83696800 | -5.04739800 | 1.05446300  |
| C | -2.73476900 | -2.87618200 | -0.72671200 |
| C | -3.93516000 | -3.62058500 | -0.57106000 |
| C | -3.95700100 | -4.71686100 | 0.35751500  |
| C | -5.09880800 | -3.25414100 | -1.29815500 |
| H | -5.99204700 | -3.87535000 | -1.21159700 |
| C | -5.06567700 | -2.16937100 | -2.13374900 |
| C | -3.95509700 | -1.28403200 | -2.08133500 |
| C | -2.84406400 | -1.55675000 | -1.25365100 |
| H | -2.86614200 | -5.81881600 | 1.82751400  |
| H | 1.77668700  | -5.11177300 | 1.05951500  |
| H | -0.42946100 | -5.76010700 | 2.04320900  |
| H | 1.83115000  | -3.81020700 | -1.02998200 |
| H | -4.90451400 | -5.23050900 | 0.53061300  |
| H | -5.90528700 | -1.92447500 | -2.78635200 |
| C | -0.26970100 | -2.88026900 | -2.51649200 |
| C | -1.14846100 | -3.82516500 | -3.35391700 |
| C | 1.11988000  | -2.81789200 | -3.14558900 |
| H | -0.69513000 | -1.87295000 | -2.59252300 |
| H | -2.19595200 | -3.84015500 | -3.02077000 |
| H | -1.13447700 | -3.51157200 | -4.40885000 |
| H | -0.76088300 | -4.85491700 | -3.30123400 |
| H | 1.80084500  | -2.19052000 | -2.56034700 |
| H | 1.55738300  | -3.82428200 | -3.24375000 |
| H | 1.03958200  | -2.39433900 | -4.15776100 |
| C | -3.94277900 | -0.10459700 | -2.89147100 |
| C | -2.99061800 | 0.86983800  | -2.77211000 |
| H | -4.74382100 | 0.01587200  | -3.62578400 |
| H | -3.00195400 | 1.77841400  | -3.37263500 |
| C | -1.92678500 | -0.42306200 | -0.89005600 |
| H | -0.76365200 | -0.57411700 | -1.16896200 |
| C | -2.12462900 | 0.80005200  | -1.65857300 |
| O | -1.50671900 | 1.90627800  | -1.36263900 |
| C | -1.69337200 | -0.09719300 | 0.59341700  |
| C | -1.79933500 | -1.11118500 | 1.67881400  |
| C | -3.03923800 | -1.64454900 | 2.05546200  |
| C | -0.65419700 | -1.43769400 | 2.41741000  |
| C | -3.12868000 | -2.50253500 | 3.15043100  |
| H | -3.93881900 | -1.37219600 | 1.49785600  |
| C | -0.74838500 | -2.30334200 | 3.50840900  |
| H | 0.29887500  | -0.98642300 | 2.12580100  |
| C | -1.98310000 | -2.83896400 | 3.87565000  |

|   |             |             |             |
|---|-------------|-------------|-------------|
| H | -4.09949200 | -2.90868700 | 3.44099700  |
| H | 0.14915800  | -2.55516000 | 4.07746600  |
| H | -2.05628200 | -3.51307900 | 4.73120300  |
| C | -1.23385300 | 2.31771800  | 0.01359500  |
| C | 0.14493300  | 2.95664400  | 0.03910500  |
| C | 0.92952700  | 3.08950900  | -1.09823400 |
| C | 0.62424500  | 3.46867800  | 1.25548200  |
| C | 2.18166400  | 3.71266600  | -1.04042600 |
| H | 0.58508500  | 2.68313200  | -2.04887500 |
| C | 1.86467000  | 4.07693500  | 1.32827400  |
| H | 0.01549900  | 3.39236300  | 2.15963000  |
| C | 2.66412400  | 4.19243200  | 0.17721000  |
| H | 2.78472200  | 3.77219600  | -1.94563400 |
| H | 2.25165900  | 4.46315700  | 2.27229500  |
| C | -2.33108900 | 3.34490400  | 0.32708400  |
| C | -3.53471900 | 2.95576300  | 0.91511600  |
| C | -2.18527200 | 4.68483500  | -0.06681000 |
| C | -4.57211300 | 3.86719300  | 1.12665700  |
| H | -3.68125200 | 1.91893900  | 1.22421500  |
| C | -3.20718600 | 5.59970500  | 0.12927200  |
| H | -1.25588200 | 5.01673900  | -0.53310700 |
| C | -4.41176500 | 5.19986300  | 0.73167800  |
| H | -5.49298900 | 3.52696600  | 1.59841600  |
| H | -3.09836600 | 6.64213300  | -0.17331100 |
| O | 3.87444900  | 4.76427300  | 0.34561000  |
| O | -5.34720700 | 6.15395100  | 0.88934500  |
| C | 4.72966800  | 4.85437600  | -0.77034500 |
| H | 4.29536300  | 5.49288300  | -1.55751200 |
| H | 5.66270100  | 5.30794800  | -0.41560000 |
| H | 4.94888400  | 3.85909300  | -1.19117900 |
| C | -6.57531300 | 5.80018300  | 1.48586800  |
| H | -7.18379800 | 6.71115800  | 1.51254200  |
| H | -7.10114700 | 5.03187400  | 0.89668500  |
| H | -6.43115900 | 5.43197600  | 2.51420200  |
| C | -1.32193800 | 1.13893400  | 0.93637500  |
| H | -1.12783500 | 1.36393300  | 1.98683600  |
| P | 1.90935700  | -0.14967700 | -0.40892100 |
| O | 2.92929400  | 0.81640900  | -1.26833400 |
| O | 1.79970500  | 0.25473300  | 1.02010500  |
| O | 0.72155500  | -0.29950600 | -1.32745700 |
| O | 2.76376200  | -1.56181700 | -0.52114000 |
| C | 4.20334700  | 1.11785400  | -0.88043300 |
| C | 4.51751600  | 1.50715200  | 0.42622200  |
| C | 5.19829300  | 1.06507100  | -1.86105300 |

|   |            |             |             |
|---|------------|-------------|-------------|
| C | 5.83782700 | 1.82400300  | 0.74310700  |
| H | 3.72130600 | 1.55174200  | 1.16890800  |
| C | 6.51356200 | 1.39027000  | -1.53144900 |
| H | 4.92055100 | 0.76103700  | -2.87159400 |
| C | 6.84011400 | 1.76697600  | -0.22719900 |
| H | 6.08162900 | 2.12601800  | 1.76350700  |
| H | 7.28795700 | 1.34425300  | -2.29962900 |
| H | 7.87021300 | 2.01787900  | 0.03065200  |
| C | 3.64427300 | -2.00002800 | 0.43096400  |
| C | 3.20751200 | -2.34138800 | 1.71321100  |
| C | 4.98793700 | -2.14546600 | 0.07854400  |
| C | 4.12808300 | -2.82062400 | 2.64452900  |
| H | 2.15225300 | -2.22785400 | 1.96016400  |
| C | 5.89942400 | -2.62657900 | 1.01740300  |
| H | 5.30063600 | -1.86933900 | -0.92987200 |
| C | 5.47448400 | -2.96304900 | 2.30380700  |
| H | 3.78657500 | -3.08534700 | 3.64714400  |
| H | 6.94962600 | -2.73499700 | 0.74019000  |
| H | 6.18979600 | -3.33667200 | 3.03814000  |

## 10. Computational Investigation on the Intramolecular Noncovalent Interactions of Dearomatized Allene Intermediates

To enhance our understanding of the stabilization mechanisms of dearomatized intermediates, we conducted computational investigations into the intramolecular noncovalent interactions present in **Int-H** and **Int-*i*Pr**. The optimized structures of **Int-H** and **Int-*i*Pr** are shown in Fig. S9. Quantum theory of atoms in molecules (QTAIM)<sup>[12-14]</sup> analyses were applied to analyze the weak noncovalent interactions formed in **Int-H** and **Int-*i*Pr**, and the bond critical points (BCPs) for the intramolecular noncovalent interactions in **Int-H** and **Int-*i*Pr** were plotted in Fig. S10. The corresponding distances between interacting atoms for the intramolecular noncovalent interactions, the electron density, and its Laplacian value at the bond critical points for the intramolecular

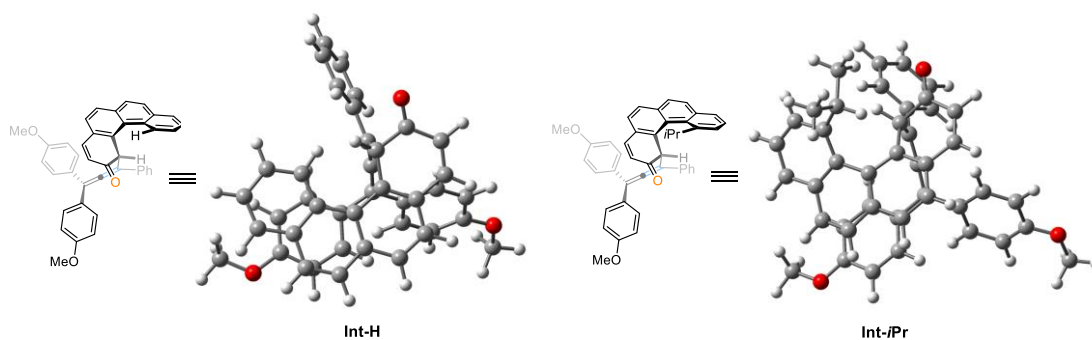

**Figure S9.** The optimized structures of **Int-H** and **Int-*i*Pr**.

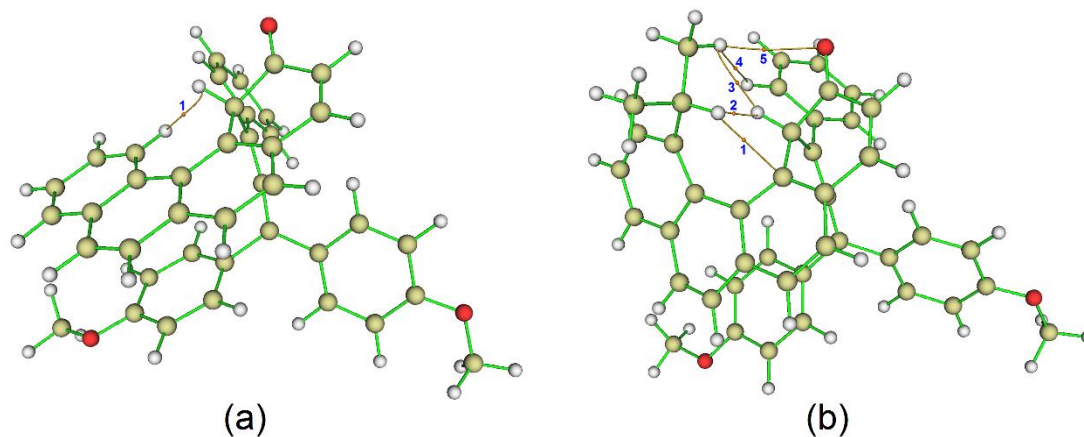

**Figure S10.** The bond critical points for the intramolecular noncovalent interactions in (a) **Int-H** and (b) **Int-iPr**.

noncovalent interactions in **Int-H** and **Int-iPr** are outlined in Table S2. In Fig. S10 it can be clearly seen that there are intramolecular C-H...H-C close contact, C-H...O and C-H... $\pi$  interaction formed between alkyl C-H group and H atom of benzene ring, between alkyl C-H group and O atom of the carbonyl group, between alkyl C-H group and  $\pi$  ring of benzene in **Int-iPr**, while there is only one intramolecular C-H...H-C close contact in **Int-H**. Clearly, the existences of more types of intramolecular noncovalent interactions in **Int-iPr** should contribute to its stability. Therefore, after the H atom of **Int-H** is substituted by alkyl group to form **Int-iPr**, **Int-iPr** possessing the alkyl group is more stable than **Int-H**.

**Table S2.** Numbers of bond critical points (BCPs No.) and the corresponding distances between atoms ( $d$ , in Å), classifications of the intramolecular interactions, electron density ( $\rho$ , in a.u.) and its Laplacian value ( $\nabla^2\rho$ , in a.u.) at the BCPs of **Int-H** and **Int-iPr**.

|                | BCPs No. | Classification | $d$    | $\rho$ | $\nabla^2\rho$ |
|----------------|----------|----------------|--------|--------|----------------|
| <b>Int-H</b>   | 1        | C-H...H-C      | 1.7999 | 0.0209 | 0.0746         |
| <b>Int-iPr</b> | 1        | C-H... $\pi$   | 2.4050 | 0.0139 | 0.0481         |
|                | 2        | C-H...H-C      | 2.1280 | 0.0147 | 0.0659         |
|                | 3        | C-H...H-C      | 2.0244 | 0.0121 | 0.0416         |
|                | 4        | C-H...H-C      | 2.3089 | 0.0058 | 0.0206         |
|                | 5        | C-H...O        | 2.7992 | 0.0056 | 0.0205         |

### Cartesian Coordinates

#### Int-H

|   |             |             |             |
|---|-------------|-------------|-------------|
| C | -4.87672600 | -0.26717000 | -0.28868600 |
| C | -4.52368900 | -1.29783900 | 0.55532400  |
| C | -3.31726100 | -1.26609500 | 1.29303100  |
| C | -2.42007500 | -0.15681900 | 1.19764000  |
| C | -2.81584800 | 0.86679600  | 0.29603100  |

|   |             |             |             |
|---|-------------|-------------|-------------|
| C | -3.99984000 | 0.81992800  | -0.41823200 |
| C | -3.01284300 | -2.39807000 | 2.12046800  |
| C | -1.17289100 | -0.17212800 | 1.99433600  |
| C | -0.91116300 | -1.35964000 | 2.75142800  |
| C | -1.84950400 | -2.44611000 | 2.80540400  |
| C | 0.28735600  | -1.52321600 | 3.48001200  |
| H | 0.44517000  | -2.45841500 | 4.01996000  |
| C | 1.22758500  | -0.52855500 | 3.50588600  |
| C | 0.97786600  | 0.68243200  | 2.82903900  |
| C | -0.19802600 | 0.87986800  | 2.08839600  |
| H | -3.72946800 | -3.22091200 | 2.16096000  |
| H | -5.81055200 | -0.30063500 | -0.85249600 |
| H | -5.17004200 | -2.17101900 | 0.66891500  |
| H | -4.23716700 | 1.64224000  | -1.09568500 |
| H | -1.59086400 | -3.31137500 | 3.41848300  |
| H | 2.16127700  | -0.64799200 | 4.05829900  |
| C | 1.99981700  | 1.72555800  | 2.94741000  |
| C | 1.83656300  | 2.98436000  | 2.50764900  |
| H | 2.92040000  | 1.44143100  | 3.46440000  |
| H | 2.57814100  | 3.76901500  | 2.66434000  |
| C | -0.30883700 | 2.20686600  | 1.35779700  |
| H | -1.33259900 | 2.59147000  | 1.42640700  |
| C | 0.55760500  | 3.35066300  | 1.89278100  |
| O | 0.20331200  | 4.50251700  | 1.75701800  |
| C | 0.08092900  | 2.03977700  | -0.13077000 |
| C | -0.22300400 | 3.12040400  | -1.11347500 |
| C | -1.21762800 | 4.08054800  | -0.87651700 |
| C | 0.46286000  | 3.15714100  | -2.33958700 |
| C | -1.53001600 | 5.03371100  | -1.84687500 |
| H | -1.74911000 | 4.10278200  | 0.07451400  |
| C | 0.15215700  | 4.11046800  | -3.30421900 |
| H | 1.25417900  | 2.42828800  | -2.52836000 |
| C | -0.85005700 | 5.05308700  | -3.06310600 |
| H | -2.31034200 | 5.76910800  | -1.64338300 |
| H | 0.70030300  | 4.12136000  | -4.24795400 |
| H | -1.09307900 | 5.80304100  | -3.81771200 |
| C | 1.05884800  | -0.30461900 | -0.82131800 |
| C | 2.49182100  | -0.69846800 | -0.78276000 |
| C | 2.95283700  | -1.82719300 | -1.46585300 |
| C | 3.42920600  | 0.07012200  | -0.06732800 |
| C | 4.30067400  | -2.19366200 | -1.44512700 |
| H | 2.25180600  | -2.43836600 | -2.03722900 |
| C | 4.76831700  | -0.27957200 | -0.03869200 |
| H | 3.09027300  | 0.95407300  | 0.47886400  |

|   |             |             |             |
|---|-------------|-------------|-------------|
| C | 5.21844100  | -1.41952800 | -0.72730300 |
| H | 4.62032900  | -3.07989300 | -1.99185600 |
| H | 5.49600900  | 0.31197300  | 0.51884300  |
| C | -0.00943200 | -1.30112900 | -1.13973800 |
| C | -1.06296900 | -0.97049800 | -1.99452600 |
| C | -0.05050100 | -2.54101600 | -0.47853000 |
| C | -2.14943500 | -1.82747600 | -2.17970300 |
| H | -1.04463800 | -0.01147900 | -2.51768100 |
| C | -1.12643600 | -3.39937900 | -0.64781000 |
| H | 0.75978000  | -2.82042500 | 0.19904700  |
| C | -2.19555100 | -3.04083400 | -1.48503100 |
| H | -2.95775600 | -1.52994000 | -2.84677100 |
| H | -1.17799300 | -4.35199100 | -0.11829800 |
| O | 6.53505000  | -1.69092200 | -0.64056000 |
| O | -3.22103700 | -3.91484800 | -1.55410000 |
| C | 7.03059600  | -2.82717600 | -1.31219500 |
| H | 6.86850500  | -2.75409800 | -2.39961900 |
| H | 8.10734000  | -2.86459100 | -1.11162600 |
| H | 6.56145400  | -3.75147700 | -0.93817200 |
| C | -4.29172200 | -3.62020900 | -2.42189300 |
| H | -5.00567000 | -4.44706200 | -2.33151800 |
| H | -4.79165800 | -2.67911500 | -2.14157700 |
| H | -3.95211200 | -3.54929600 | -3.46806200 |
| C | 0.64511900  | 0.91046900  | -0.51122900 |
| H | -2.19138100 | 1.72453900  | 0.10333400  |

**Int-iPr**

|   |             |             |             |
|---|-------------|-------------|-------------|
| C | -4.68173800 | 1.63889400  | 0.74561800  |
| C | -3.72209400 | 2.51190000  | 0.27782100  |
| C | -2.71889300 | 2.05425500  | -0.60392900 |
| C | -2.63692200 | 0.67460700  | -0.94264100 |
| C | -3.75507100 | -0.16276400 | -0.62838700 |
| C | -4.72303000 | 0.32799200  | 0.24209600  |
| C | -1.84621100 | 3.00322900  | -1.25121100 |
| C | -1.45176600 | 0.23821900  | -1.68810300 |
| C | -0.72044000 | 1.20583500  | -2.43028300 |
| C | -0.96798300 | 2.60629300  | -2.20500400 |
| C | 0.32612900  | 0.79854500  | -3.29070500 |
| H | 0.84785100  | 1.55678100  | -3.87798800 |
| C | 0.69174800  | -0.52596900 | -3.36686900 |
| C | 0.11264500  | -1.46233600 | -2.48105500 |
| C | -0.90544400 | -1.06991400 | -1.60684700 |
| H | -1.96272000 | 4.06105000  | -1.00371600 |
| H | -5.45279900 | 1.98017500  | 1.43824100  |
| H | -3.73893000 | 3.56831700  | 0.55423400  |

|   |             |             |             |
|---|-------------|-------------|-------------|
| H | -5.57689900 | -0.30299200 | 0.49692600  |
| H | -0.36909800 | 3.33351800  | -2.75705300 |
| H | 1.48045300  | -0.85223000 | -4.04771900 |
| C | -4.08065700 | -1.43955900 | -1.40870100 |
| C | -5.09182400 | -1.07810300 | -2.50630500 |
| C | -4.61782700 | -2.59272200 | -0.55803900 |
| H | -3.17826700 | -1.78908600 | -1.92467500 |
| H | -4.70875500 | -0.27292200 | -3.15051500 |
| H | -5.29944300 | -1.95536300 | -3.13761600 |
| H | -6.04220300 | -0.73961800 | -2.06532700 |
| H | -3.91539300 | -2.90350300 | 0.22946300  |
| H | -5.57541600 | -2.33292000 | -0.08280800 |
| H | -4.79914500 | -3.46877800 | -1.19825300 |
| C | 0.61144600  | -2.83806800 | -2.44948100 |
| C | 0.15303400  | -3.77523400 | -1.59654300 |
| H | 1.37880000  | -3.09812000 | -3.18411700 |
| H | 0.49642700  | -4.81047200 | -1.62732300 |
| C | -1.17116700 | -1.95209800 | -0.40947000 |
| H | -2.19349100 | -1.87362400 | -0.04014400 |
| C | -0.89793900 | -3.43764300 | -0.62289000 |
| O | -1.48516000 | -4.27766700 | 0.02642000  |
| C | -0.26874400 | -1.49362400 | 0.75842300  |
| C | -0.53618100 | -2.05840900 | 2.11529600  |
| C | -1.84465400 | -2.23688400 | 2.58686200  |
| C | 0.53615200  | -2.38965900 | 2.95617400  |
| C | -2.07125300 | -2.72501100 | 3.87278400  |
| H | -2.69775800 | -1.97562300 | 1.95788000  |
| C | 0.30745600  | -2.87956200 | 4.24059300  |
| H | 1.55737200  | -2.26676200 | 2.58850800  |
| C | -0.99789100 | -3.04966300 | 4.70332000  |
| H | -3.09570000 | -2.85040900 | 4.22773200  |
| H | 1.15425700  | -3.13548500 | 4.87991500  |
| H | -1.17862800 | -3.43671100 | 5.70763400  |
| C | 1.63500900  | 0.30648600  | 0.45508300  |
| C | 3.04261500  | -0.07340800 | 0.13719000  |
| C | 4.12450900  | 0.69601800  | 0.57746200  |
| C | 3.32392800  | -1.25257900 | -0.57618200 |
| C | 5.44418000  | 0.32029600  | 0.31705600  |
| H | 3.94521100  | 1.60777900  | 1.14989800  |
| C | 4.62729700  | -1.63944900 | -0.84186000 |
| H | 2.49626400  | -1.87115500 | -0.92854300 |
| C | 5.70376600  | -0.85266500 | -0.40052400 |
| H | 6.25722100  | 0.94682900  | 0.68172900  |
| H | 4.84342900  | -2.55141200 | -1.40041000 |

|   |             |             |             |
|---|-------------|-------------|-------------|
| C | 1.26206600  | 1.74182300  | 0.63941400  |
| C | 0.28168400  | 2.11309700  | 1.56452600  |
| C | 1.85583600  | 2.75474200  | -0.13479400 |
| C | -0.10645900 | 3.44382400  | 1.72700000  |
| H | -0.18967800 | 1.34395100  | 2.18103600  |
| C | 1.48111100  | 4.08166400  | 0.01549300  |
| H | 2.61451000  | 2.49590000  | -0.87625300 |
| C | 0.49256300  | 4.43877300  | 0.94570100  |
| H | -0.87355200 | 3.68820800  | 2.46101000  |
| H | 1.93363300  | 4.86834000  | -0.59024100 |
| O | 6.93823300  | -1.29591400 | -0.70935700 |
| O | 0.17890400  | 5.74876200  | 1.01548900  |
| C | 8.04796400  | -0.53339100 | -0.29198600 |
| H | 8.08914700  | -0.45044200 | 0.80595700  |
| H | 8.94118900  | -1.06079700 | -0.64555400 |
| H | 8.02888200  | 0.47761100  | -0.72994600 |
| C | -0.79937600 | 6.15504200  | 1.94503100  |
| H | -0.89521000 | 7.24215300  | 1.84462800  |
| H | -1.77482700 | 5.68694000  | 1.73471000  |
| H | -0.49939100 | 5.91256400  | 2.97718200  |
| C | 0.70189900  | -0.62167300 | 0.58405200  |

## 11. X-Ray Structure of 3e

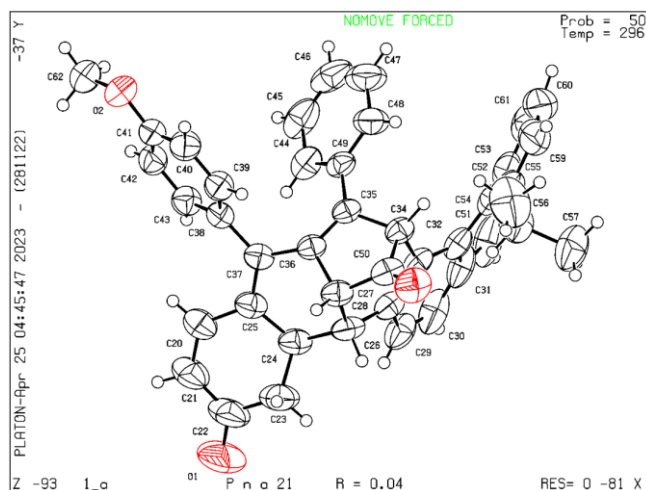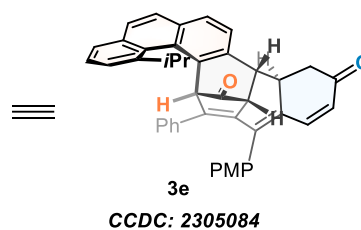

Bond precision:

C-C = 0.0054 Å

Wavelength = 0.71073

Cell: a = 10.532 (9)

b = 12.008 (10)

c = 25.67 (2)

Alpha = 90

Beta = 90

Gamma = 90

Temperature: 296 K



|                        | Calculated  | Reported     |
|------------------------|-------------|--------------|
| Volume                 | 3246 (5)    | 3246 (5)     |
| Space group            | P n a 21    | P n a 21     |
| Hall group             | P 2c -2n    | P 2c -2n     |
| Moiety formula         | C43 H34 O3  | ?            |
| Sum formula            | C43 H34 O3  | C43 H34 O3   |
| Mr                     | 598.70      | 598.70       |
| Dx, g cm <sup>-3</sup> | 1.225       | 1.225        |
| Z                      | 4           | 4            |
| Mu (mm <sup>-1</sup> ) | 0.076       | 0.076        |
| F000                   | 1264.0      | 1264.0       |
| F000'                  | 1264.54     |              |
| h, k, lmax             | 14,16,35    | 14, 16, 35   |
| Nref                   | 8773 [4480] | 8060         |
| Tmin, Tmax             | 0.982,0.985 | 0.674, 0.746 |
| Tmin'                  | 0.977       |              |

Correction method = # Reported T Limits: Tmin = 0.674 Tmax = 0.746 AbsCorr = MULTI - SCAN

Data completeness = 1.80/0.92

Theta (max) = 29.156

R (reflections) = 0.0445 (4974)

wR2 (reflections) = 0.0987 (8060)

S = 0.983

Npar = 419

## 12. Supplementary References

- [1] a) M. Sako, Y. Takeuchi, T. Tsujihara, J. Kodera, T. Kawano, S. Takizawa and H. Sasai, *J. Am. Chem. Soc.*, 2016, **138**, 11481; b) X. Liu, B. Zhu, X. Zhang, H. Zhu, J. Zhang, A. Chu, F. Wang and R. Wang, *Nat. Commun.*, 2024, **15**, 732.
- [2] a) C. D. Gabbutt, B. M. Heron, C. Kilner, S. B. Kolla, *Org. Biomol. Chem.*, 2010, **8**, 4874; b) D. Qian, L. Wu, Z. Lin and J. Sun, *Nat. Commun.*, 2017, **8**, 567; c) M. Chen, D. Qian and J. Sun, *Org. Lett.*, 2019, **21**, 8127.
- [3] M. J. Frisch, G. W. Trucks, H. B. Schlegel, G. E. Scuseria, M. A. Robb, J. R. Cheeseman, G. Scalmani, V. Barone, G. A. Petersson, H. Nakatsuji, X. Li, M. Caricato, A. V. Marenich, J. Bloino, B. G. Janesko, R.

Gomperts, B. Mennucci, H. P. Hratchian, J. V. Ortiz, A. F. Izmaylov, J. L. Sonnenberg, D. Williams-Young, F. Ding, F. Lipparini, F. Egidi, J. Goings, B. Peng, A. Petrone, T. Henderson, D. Ranasinghe, V. G. Zakrzewski, J. Gao, N. Rega, G. Zheng, W. Liang, M. Hada, M. Ehara, K. Toyota, R. Fukuda, J. Hasegawa, M. Ishida, T. Nakajima, Y. Honda, O. Kitao, H. Nakai, T. Vreven, K. Throssell, J. A. Jr. Montgomery, J. E. Peralta, F. Ogliaro, M. J. Bearpark, J. J. Heyd, E. N. Brothers, K. N. Kudin, V. N. Staroverov, T. A. Keith, R. Kobayashi, J. Normand, K. Raghavachari, A. P. Rendell, J. C. Burant, S. S. Iyengar, J. Tomasi, M. Cossi, J. M. Millam, M. Klene, C. Adamo, R. Cammi, J. W. Ochterski, R. L. Martin, K. Morokuma, O. Farkas, J. B. Foresman and D. J. Fox, *Gaussian 16, Revision C.01*; Gaussian, Inc., Wallingford CT, 2019.

- [4] K. Fukui, *Acc. Chem. Res.*, 1981, **14**, 363.
- [5] C. Gonzalez and H. B. Schlegel, *J. Chem. Phys.*, 1989, **90**, 2154.
- [6] Y. Zhao and D. G. Truhlar, *Theor. Chem. Acc.*, 2008, **120**, 215.
- [7] S. Grimme, J. Antony, S. Ehrlich and H. Krieg, *J. Chem. Phys.*, 2010, **132**, 154104.
- [8] F. Weigend and R. Ahlrichs, *Phys. Chem. Chem. Phys.*, 2005, **7**, 3297.
- [9] A. V. Marenich, C. J. Cramer and D. G. Truhlar, *J. Phys. Chem. B*, 2009, **113**, 6378.
- [10] C. Y. Legault, CYLview, 1.0 b; Université de Sherbrooke, 2009.
- [11] J. R. Murdoch, *J. Chem. Educ.*, 1981, **58**, 32.
- [12] R. F. W. Bader, *Acc. Chem. Res.*, 1985, **18**, 9-15.
- [13] R. F. W. Bader, *Atoms in Molecules: A Quantum Theory*, Oxford University Press, Oxford, UK 1990.
- [14] R. F. W. Bader, *Chem. Rev.*, 1991, **91**, 893-928.

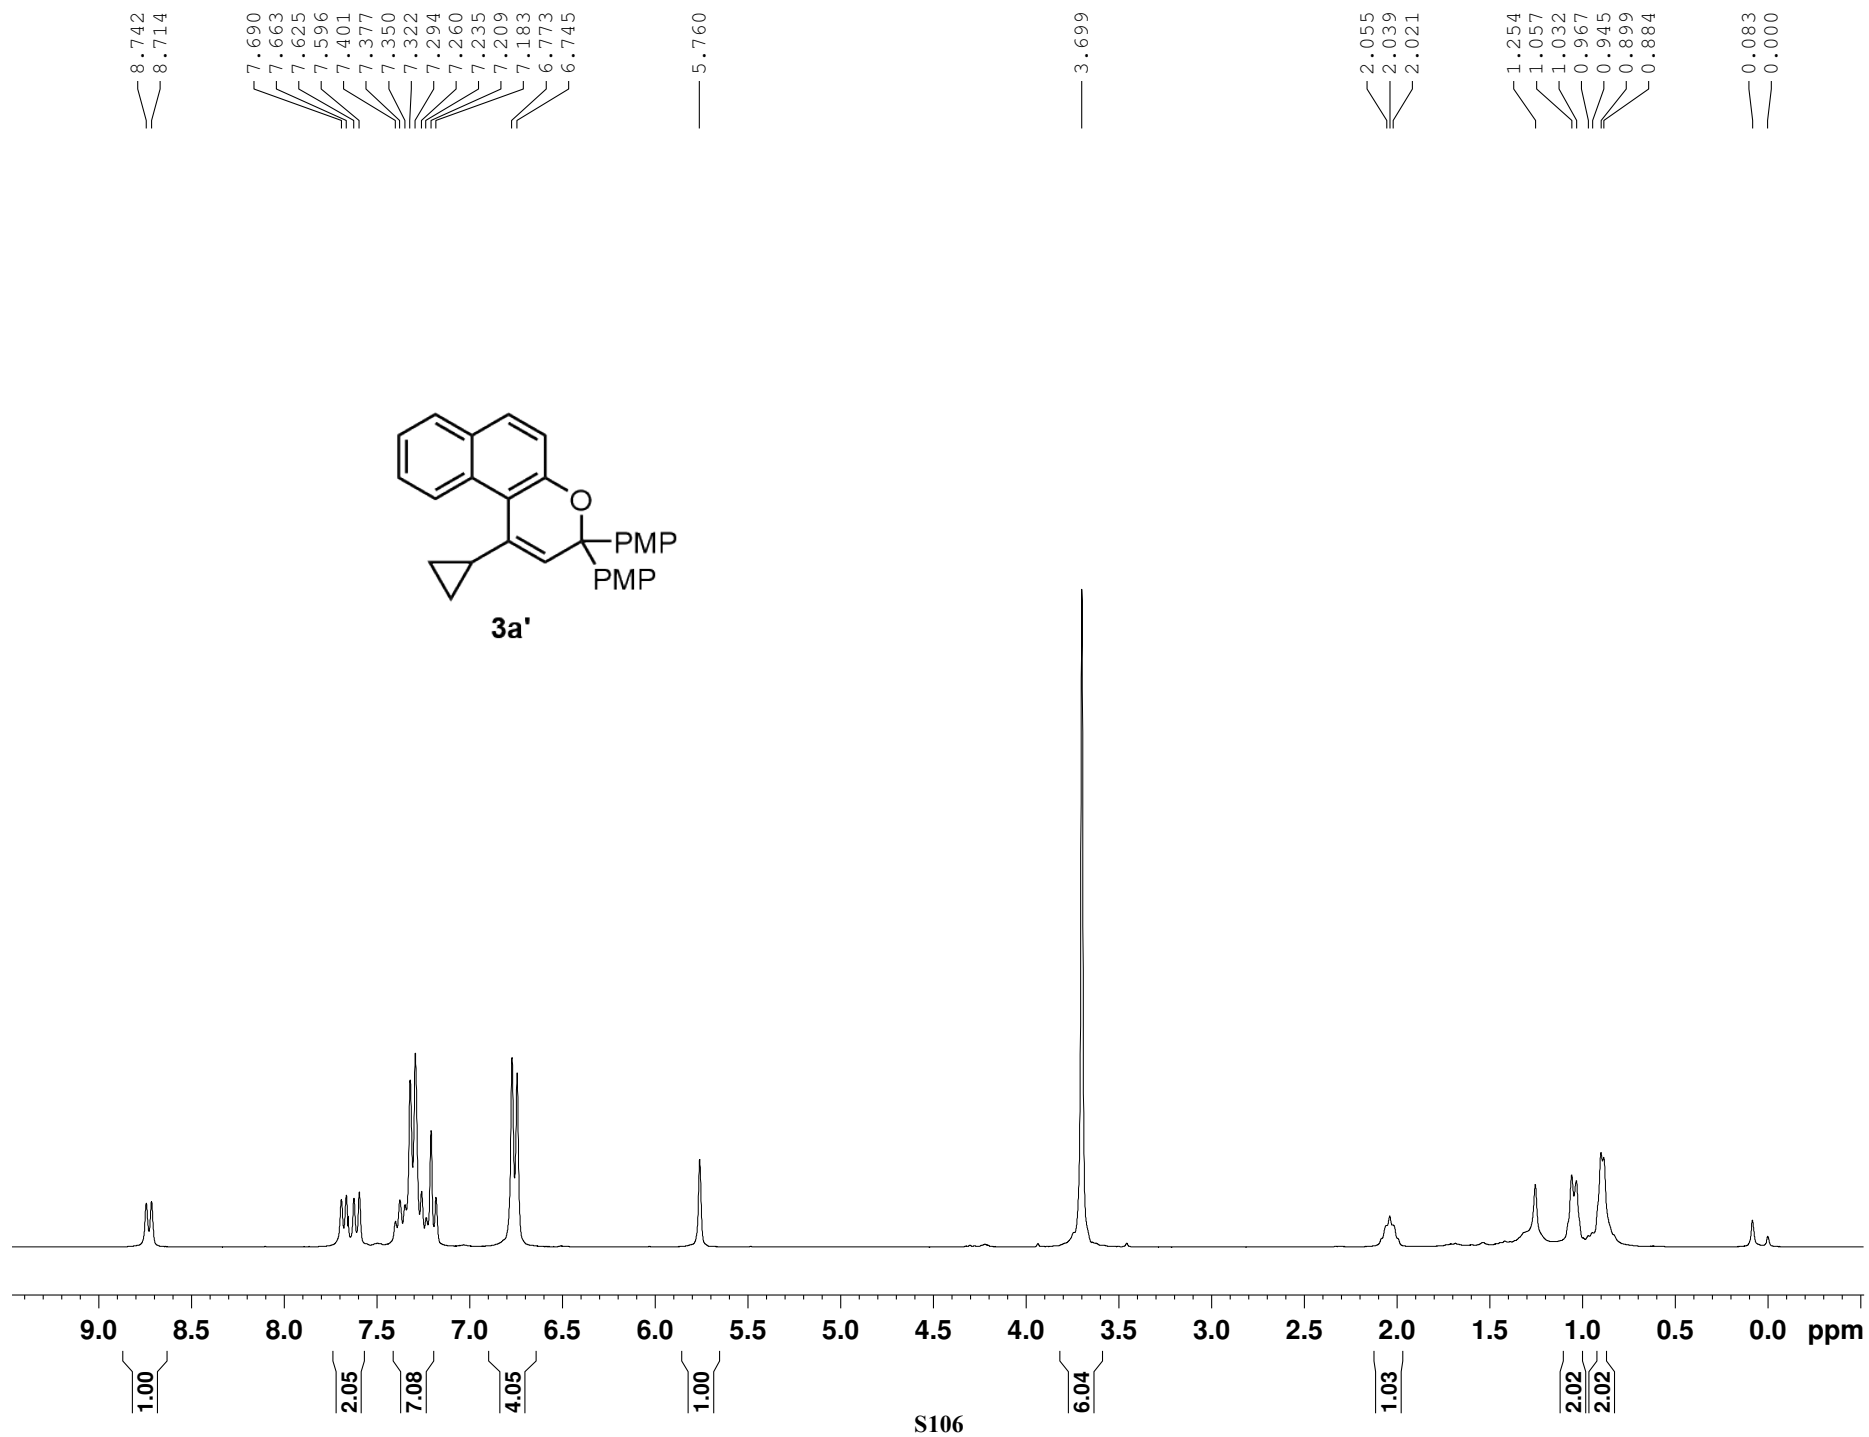

— 158.72

— 151.53

— 137.21

— 130.60

— 130.33

— 130.25

— 128.74

— 128.41

— 125.79

— 125.63

— 123.16

— 123.05

— 118.82

— 118.54

— 113.23

— 81.62

— 77.53

— 77.11

— 76.68

— 55.20

— 16.45

— 10.08

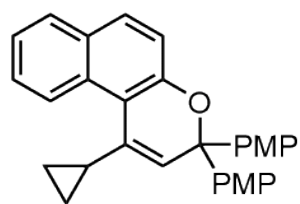

**3a'**

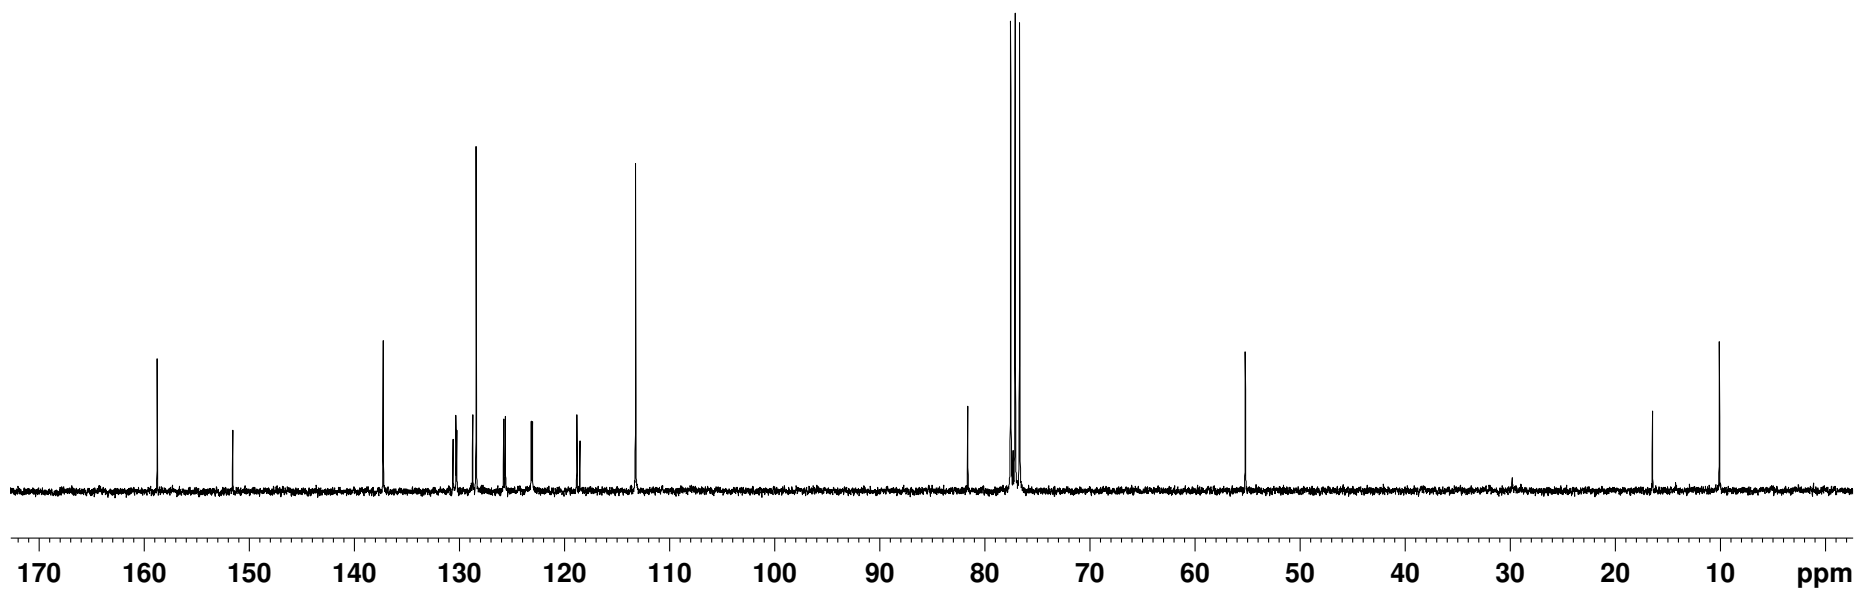

8.422  
8.398  
7.783  
7.759  
7.648  
7.620  
7.578  
7.545  
7.516  
7.492  
7.347  
7.320  
7.294  
6.888  
6.860  
6.669  
6.641

5.553

3.774  
3.562

1.477  
1.252  
0.962  
0.948  
0.875  
0.853  
0.514  
0.496  
0.463  
0.427  
0.415  
0.085  
0.000

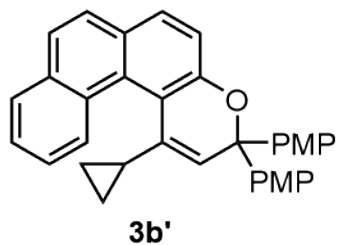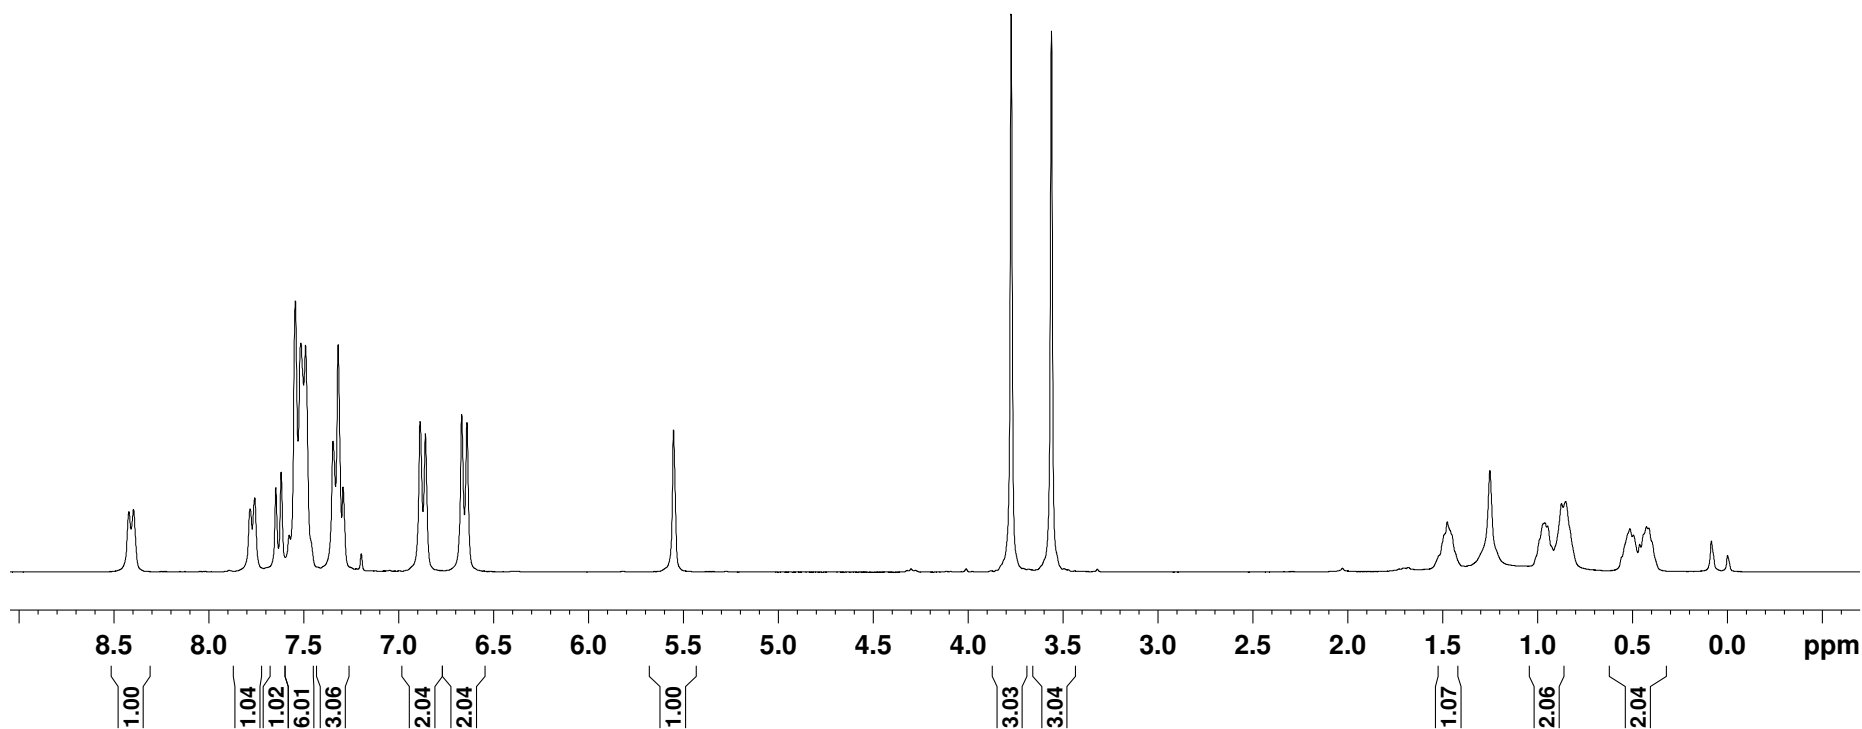

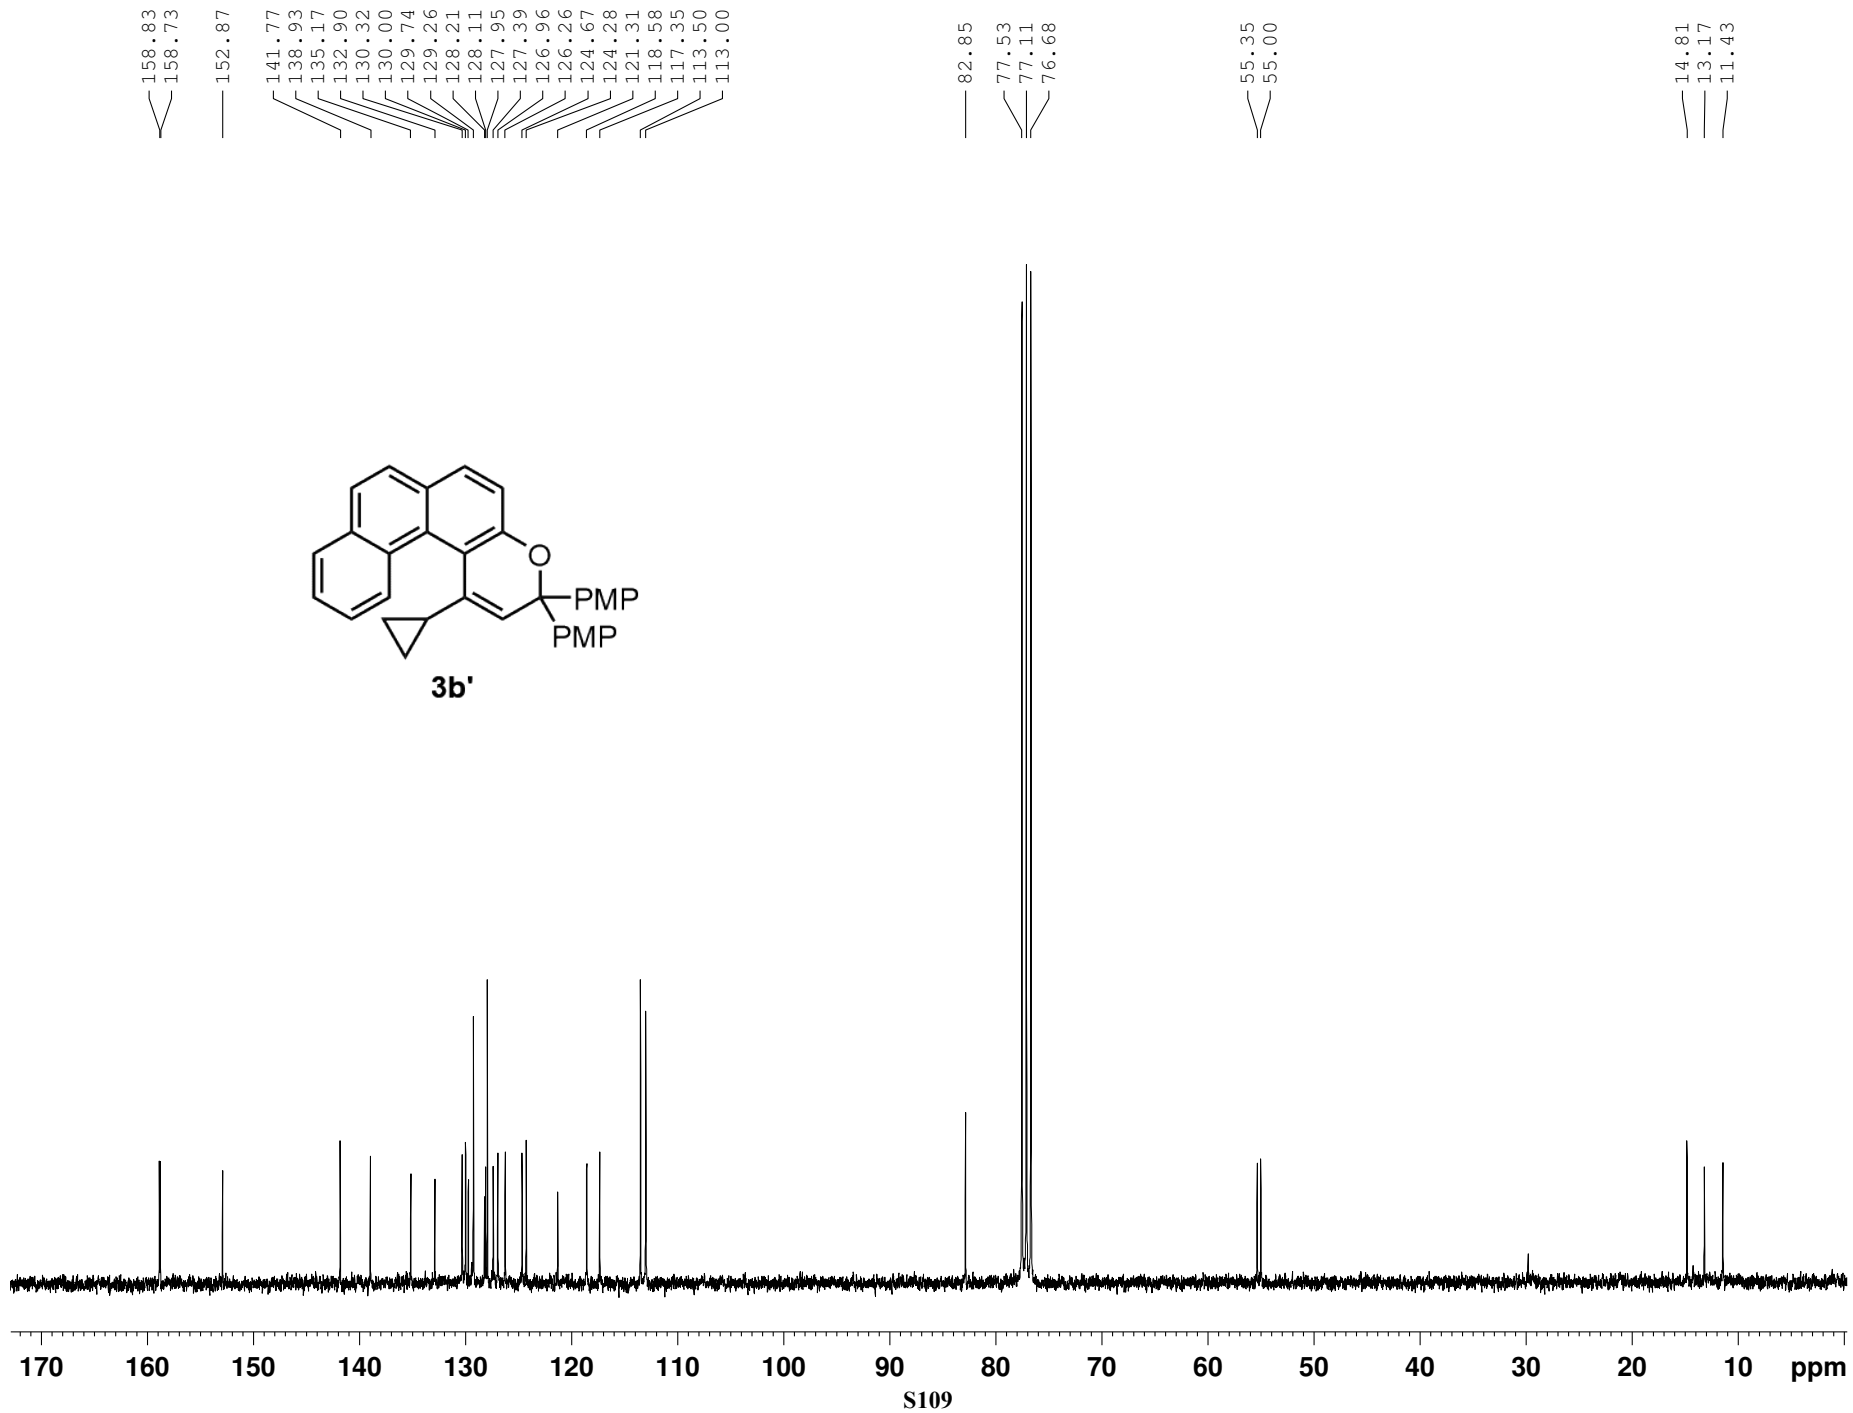

7.773  
7.765  
7.752  
7.742  
7.669  
7.642  
7.609  
7.582  
7.539  
7.515  
7.482  
7.450  
7.407  
7.382  
7.357  
7.329  
7.303  
7.233  
6.974  
6.949  
6.877  
6.851

5.554

3.783  
3.724

1.255

0.898  
0.878  
0.855

0.285  
0.263  
0.242  
0.221  
-0.002  
-0.134  
-0.154  
-0.174  
-0.272  
-0.301

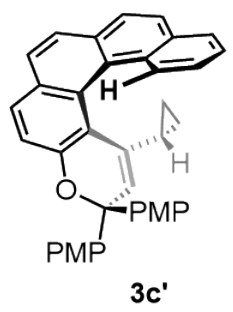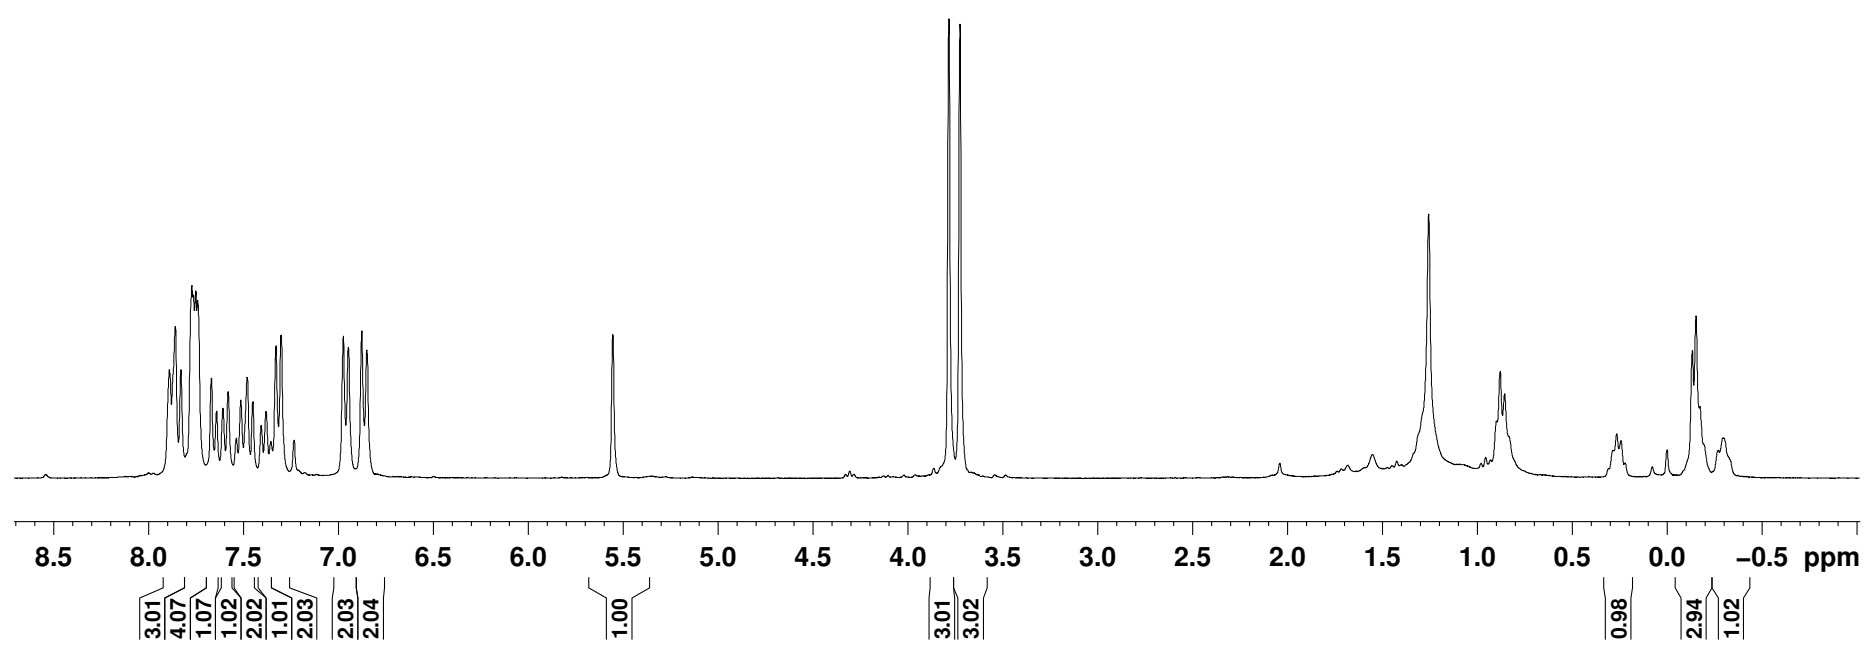

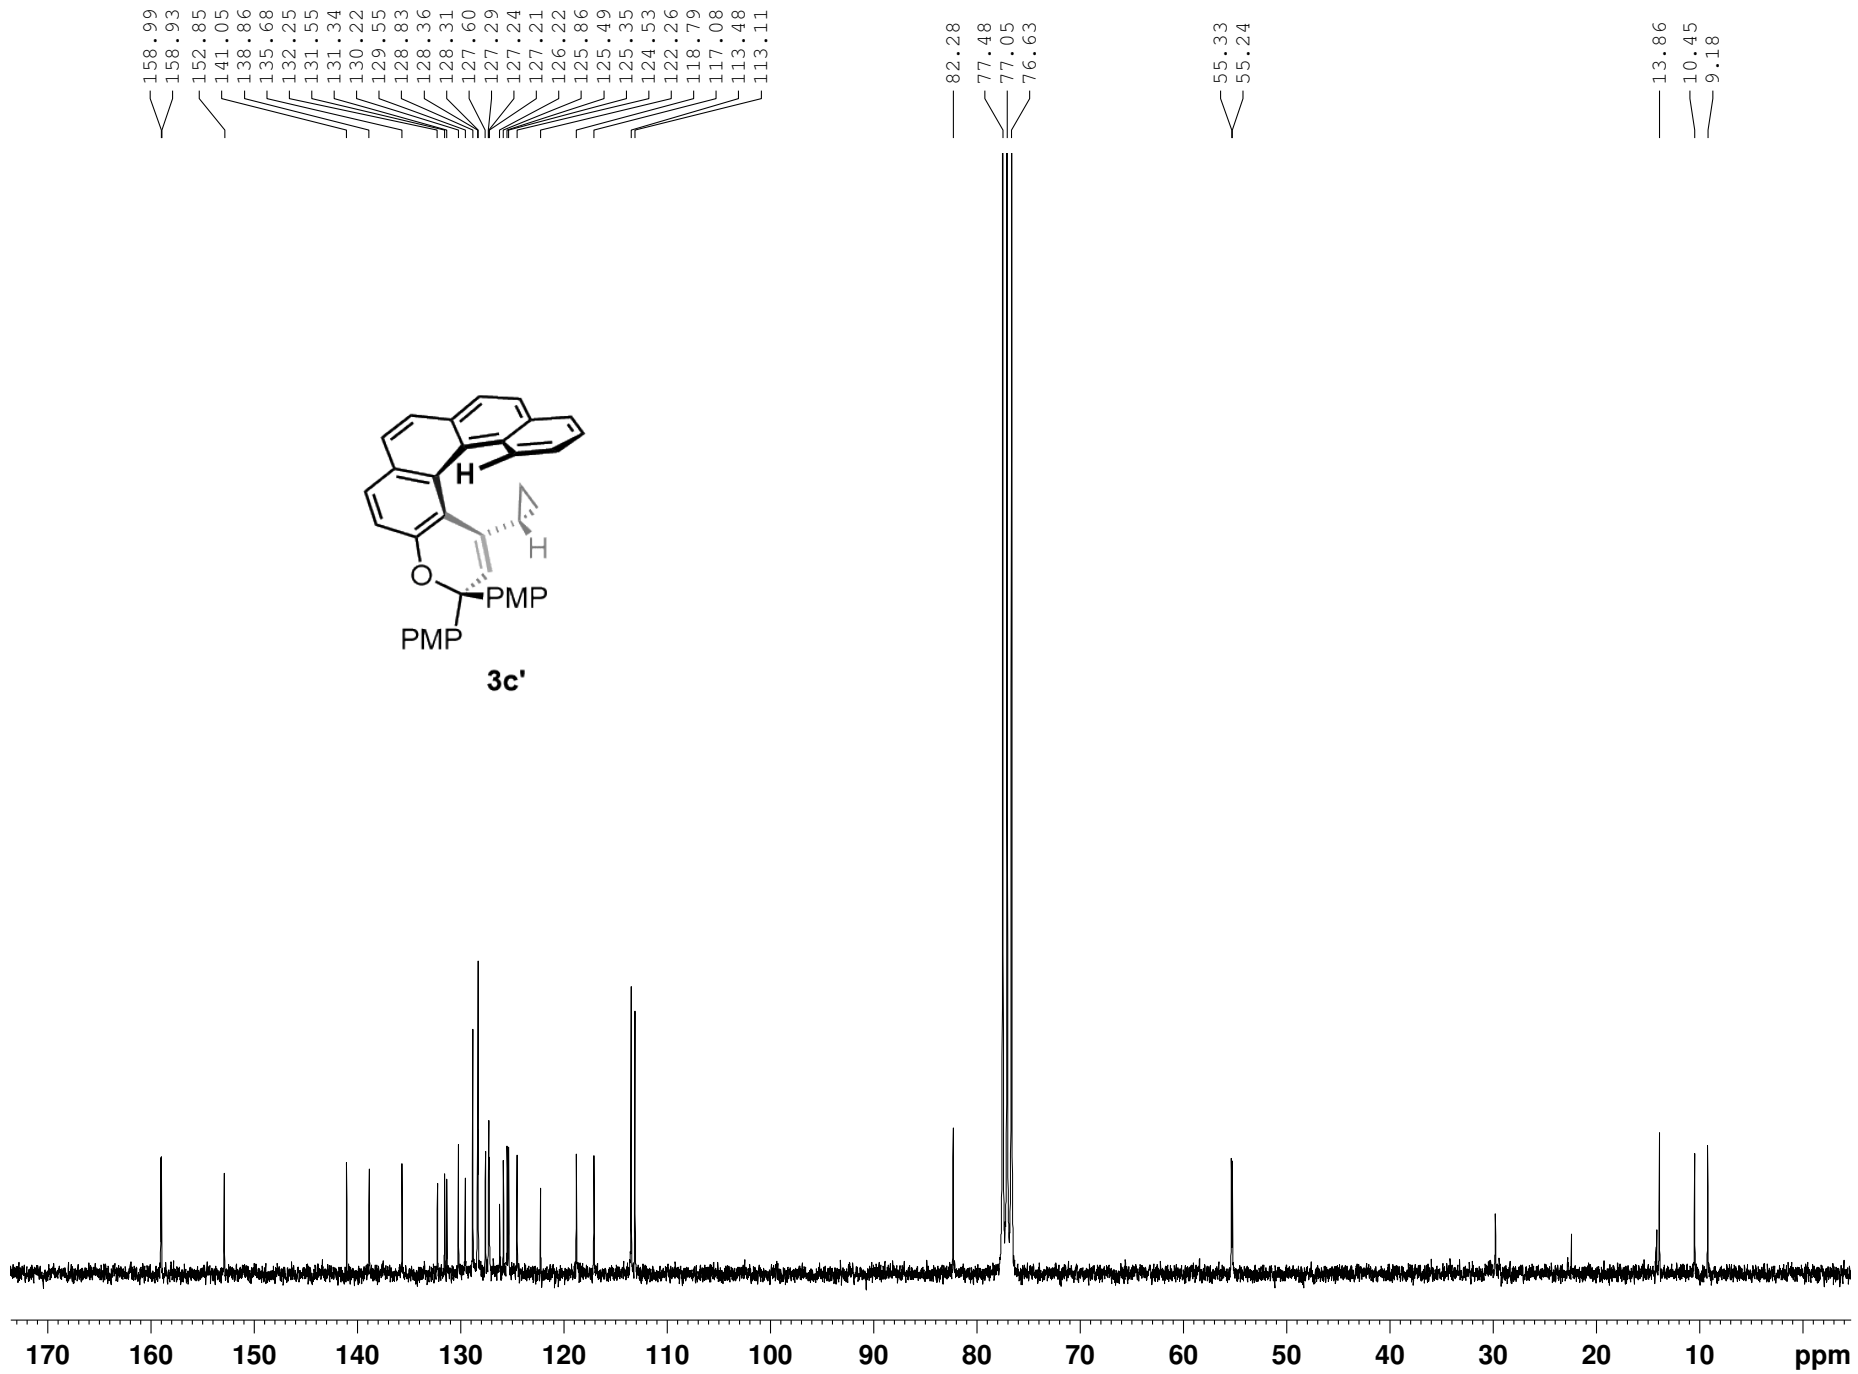



8.050  
8.022  
7.898  
7.877  
7.801  
7.774  
7.692  
7.670  
7.636  
7.607  
7.384  
7.356  
7.270  
7.242  
7.039  
7.012  
6.862  
6.833

5.474

3.777

1.255

0.876  
0.855

0.078  
-0.005  
-0.046  
-0.320

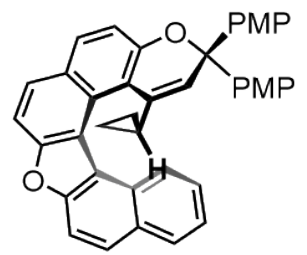

3aI'

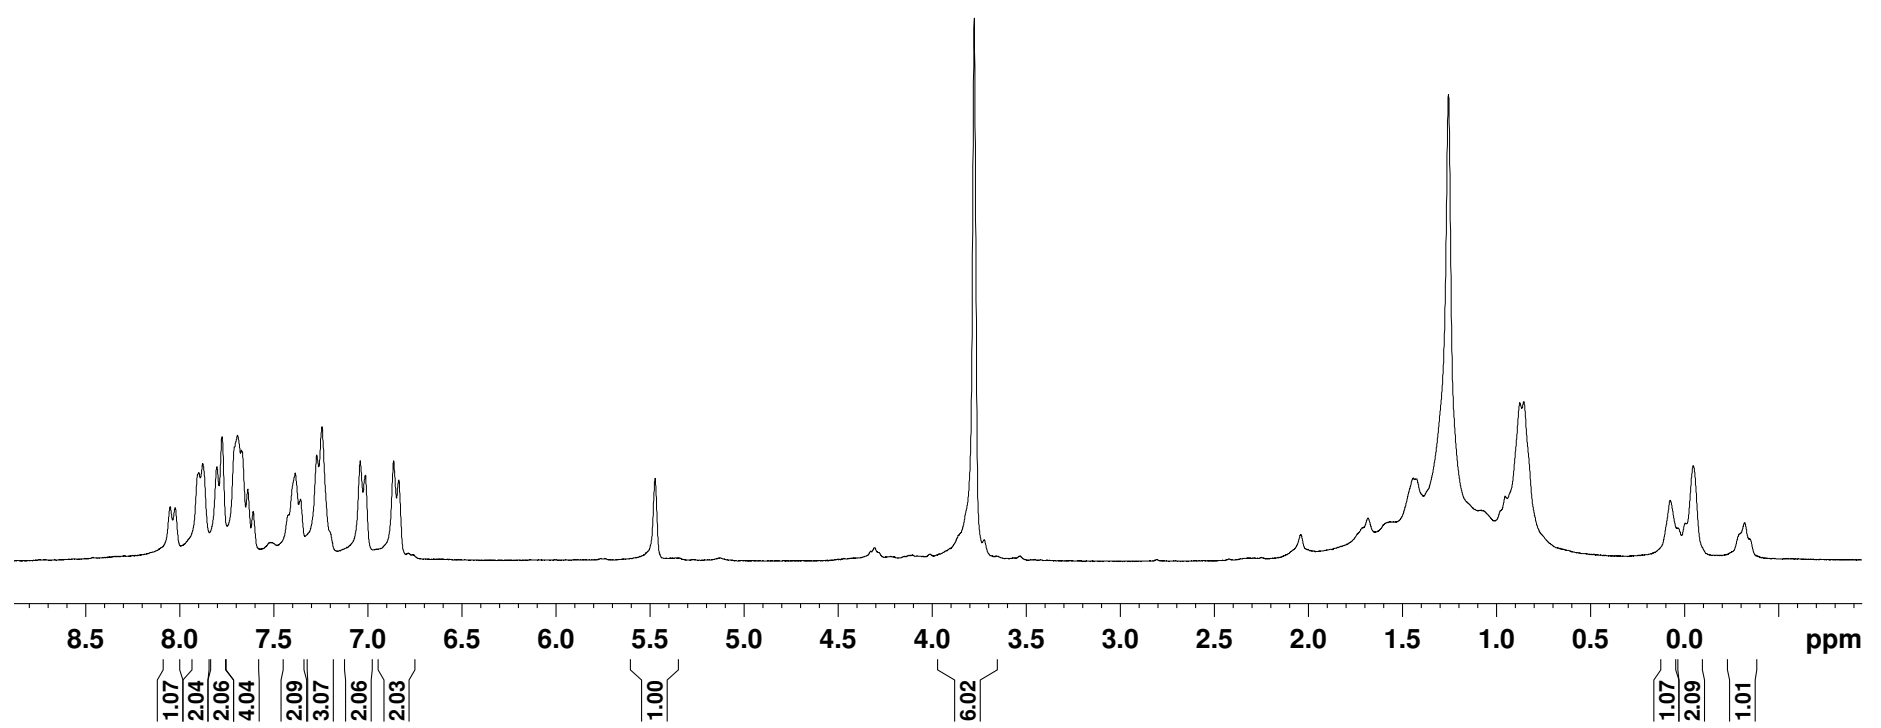

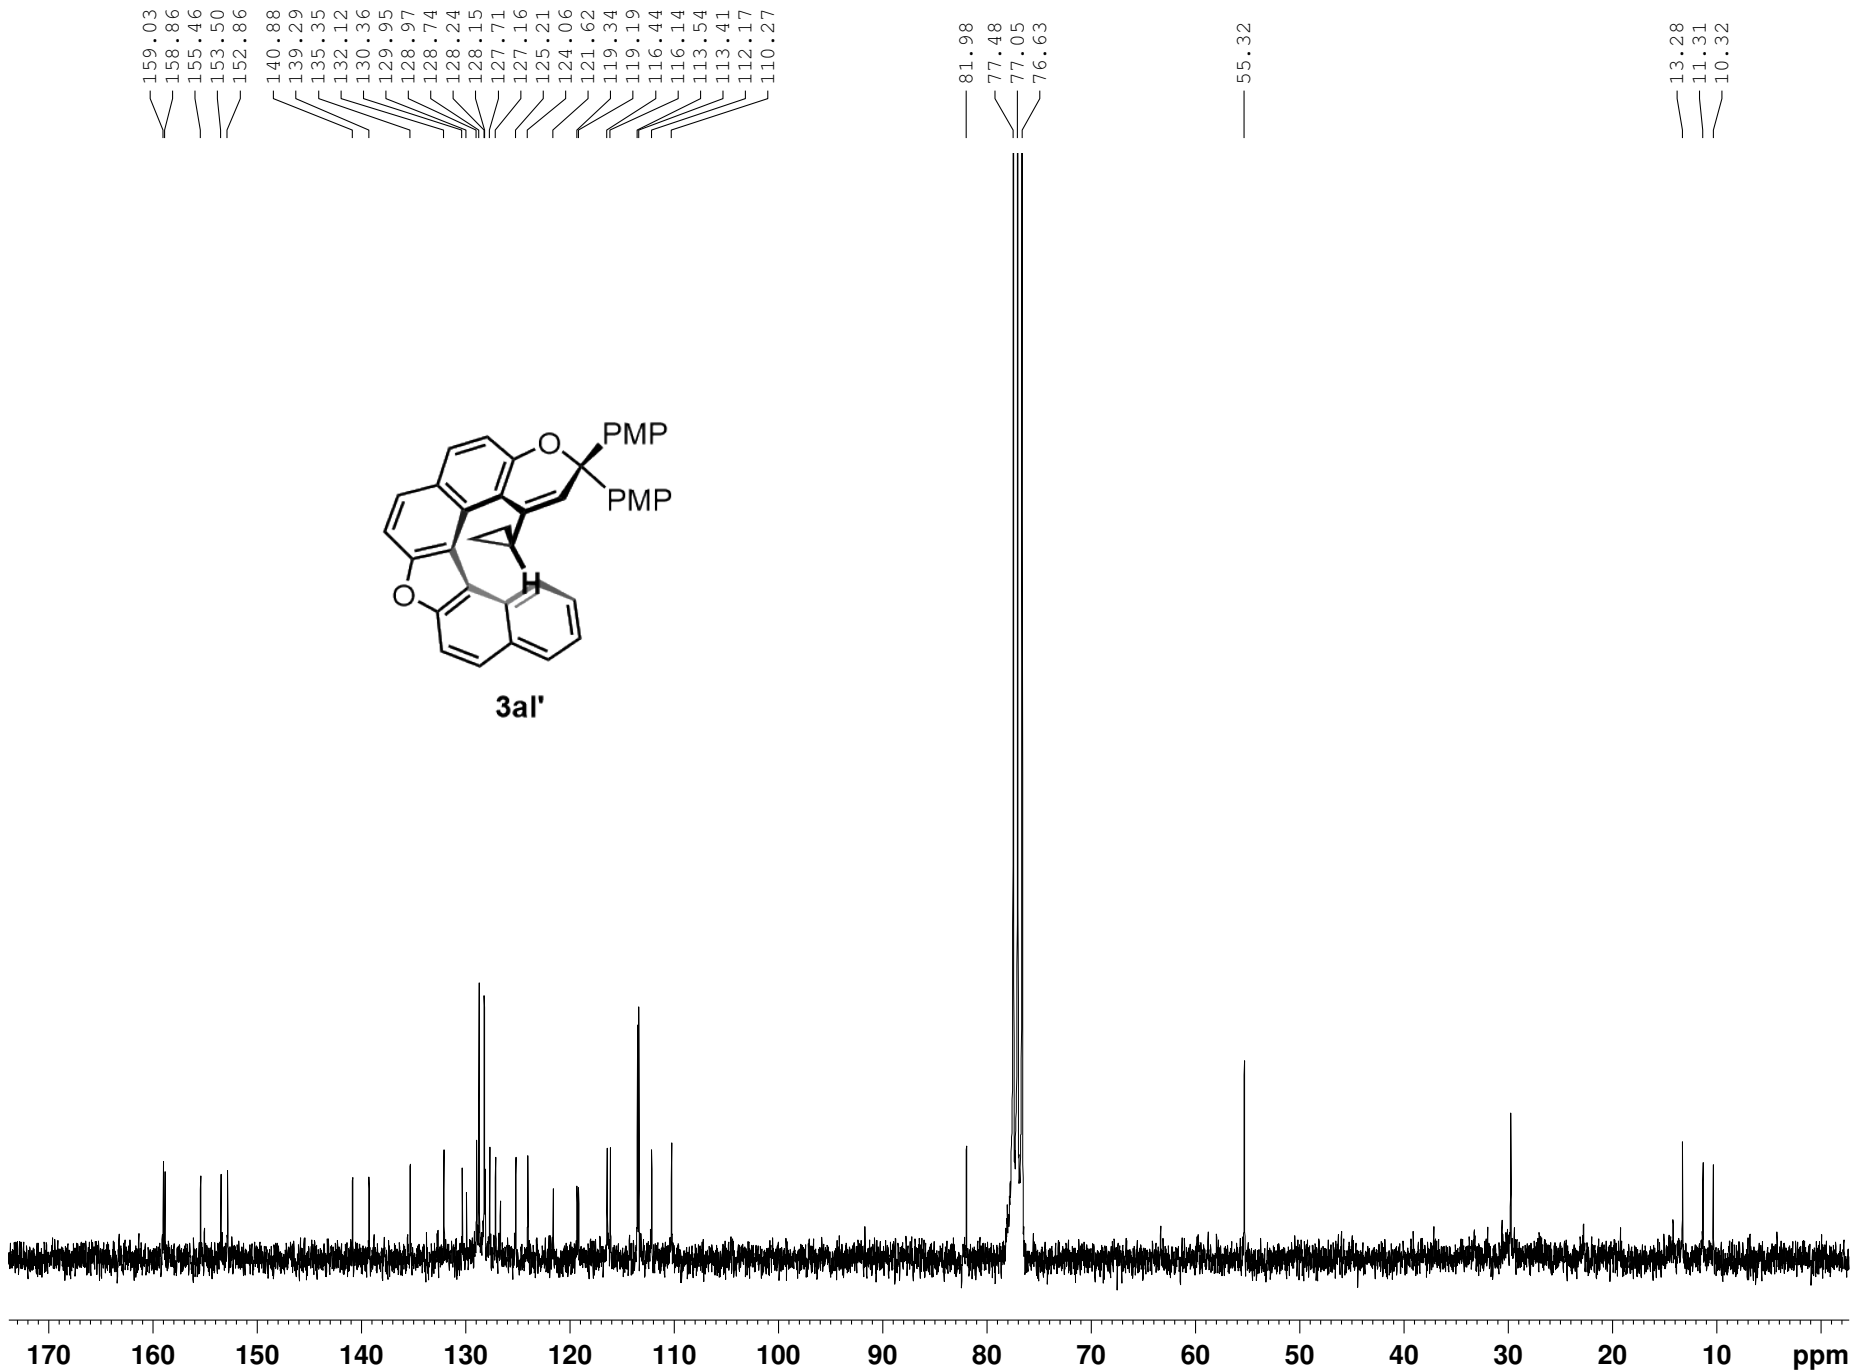

8.448  
8.431  
7.835  
7.825  
7.809  
7.706  
7.679  
7.603  
7.575  
7.543  
7.517  
7.488  
7.376  
7.349  
7.216  
7.197  
6.834  
6.808

5.915  
5.882

5.161

3.742  
3.710  
3.668  
3.651  
3.420  
3.406

2.870  
2.834

1.216  
0.837  
0.814  
0.793  
0.601  
0.573  
0.558  
0.544  
0.514  
0.048  
-0.002  
-0.019  
-0.039  
-0.296  
-0.327  
-0.343  
-0.363  
-0.907  
-0.924  
-0.940  
-0.955  
-0.972

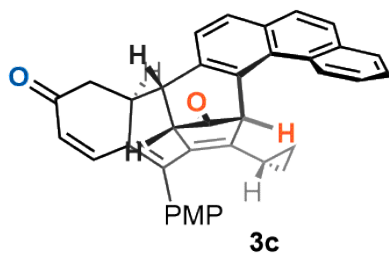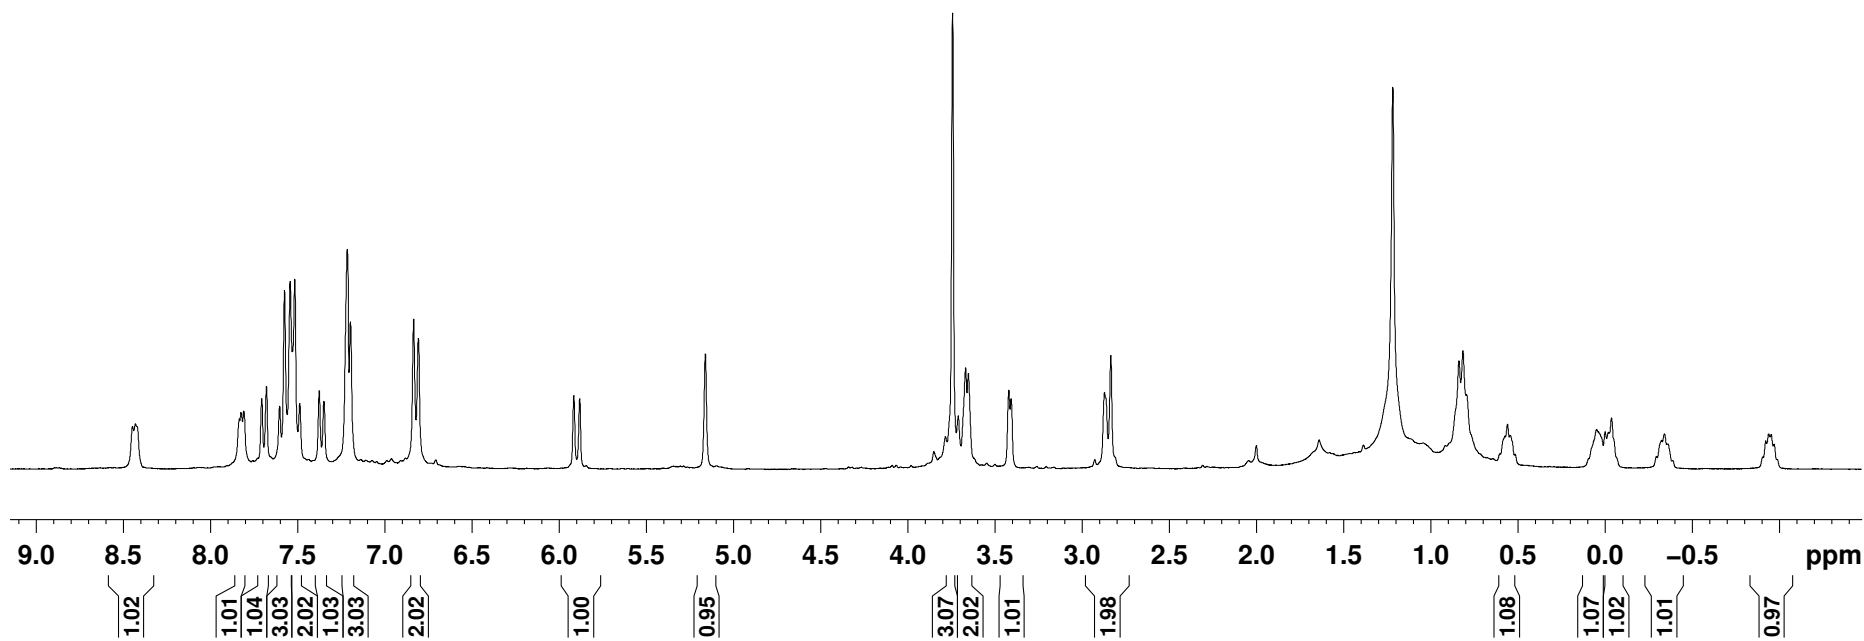

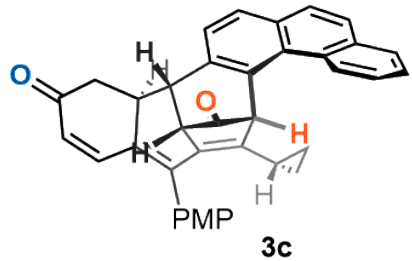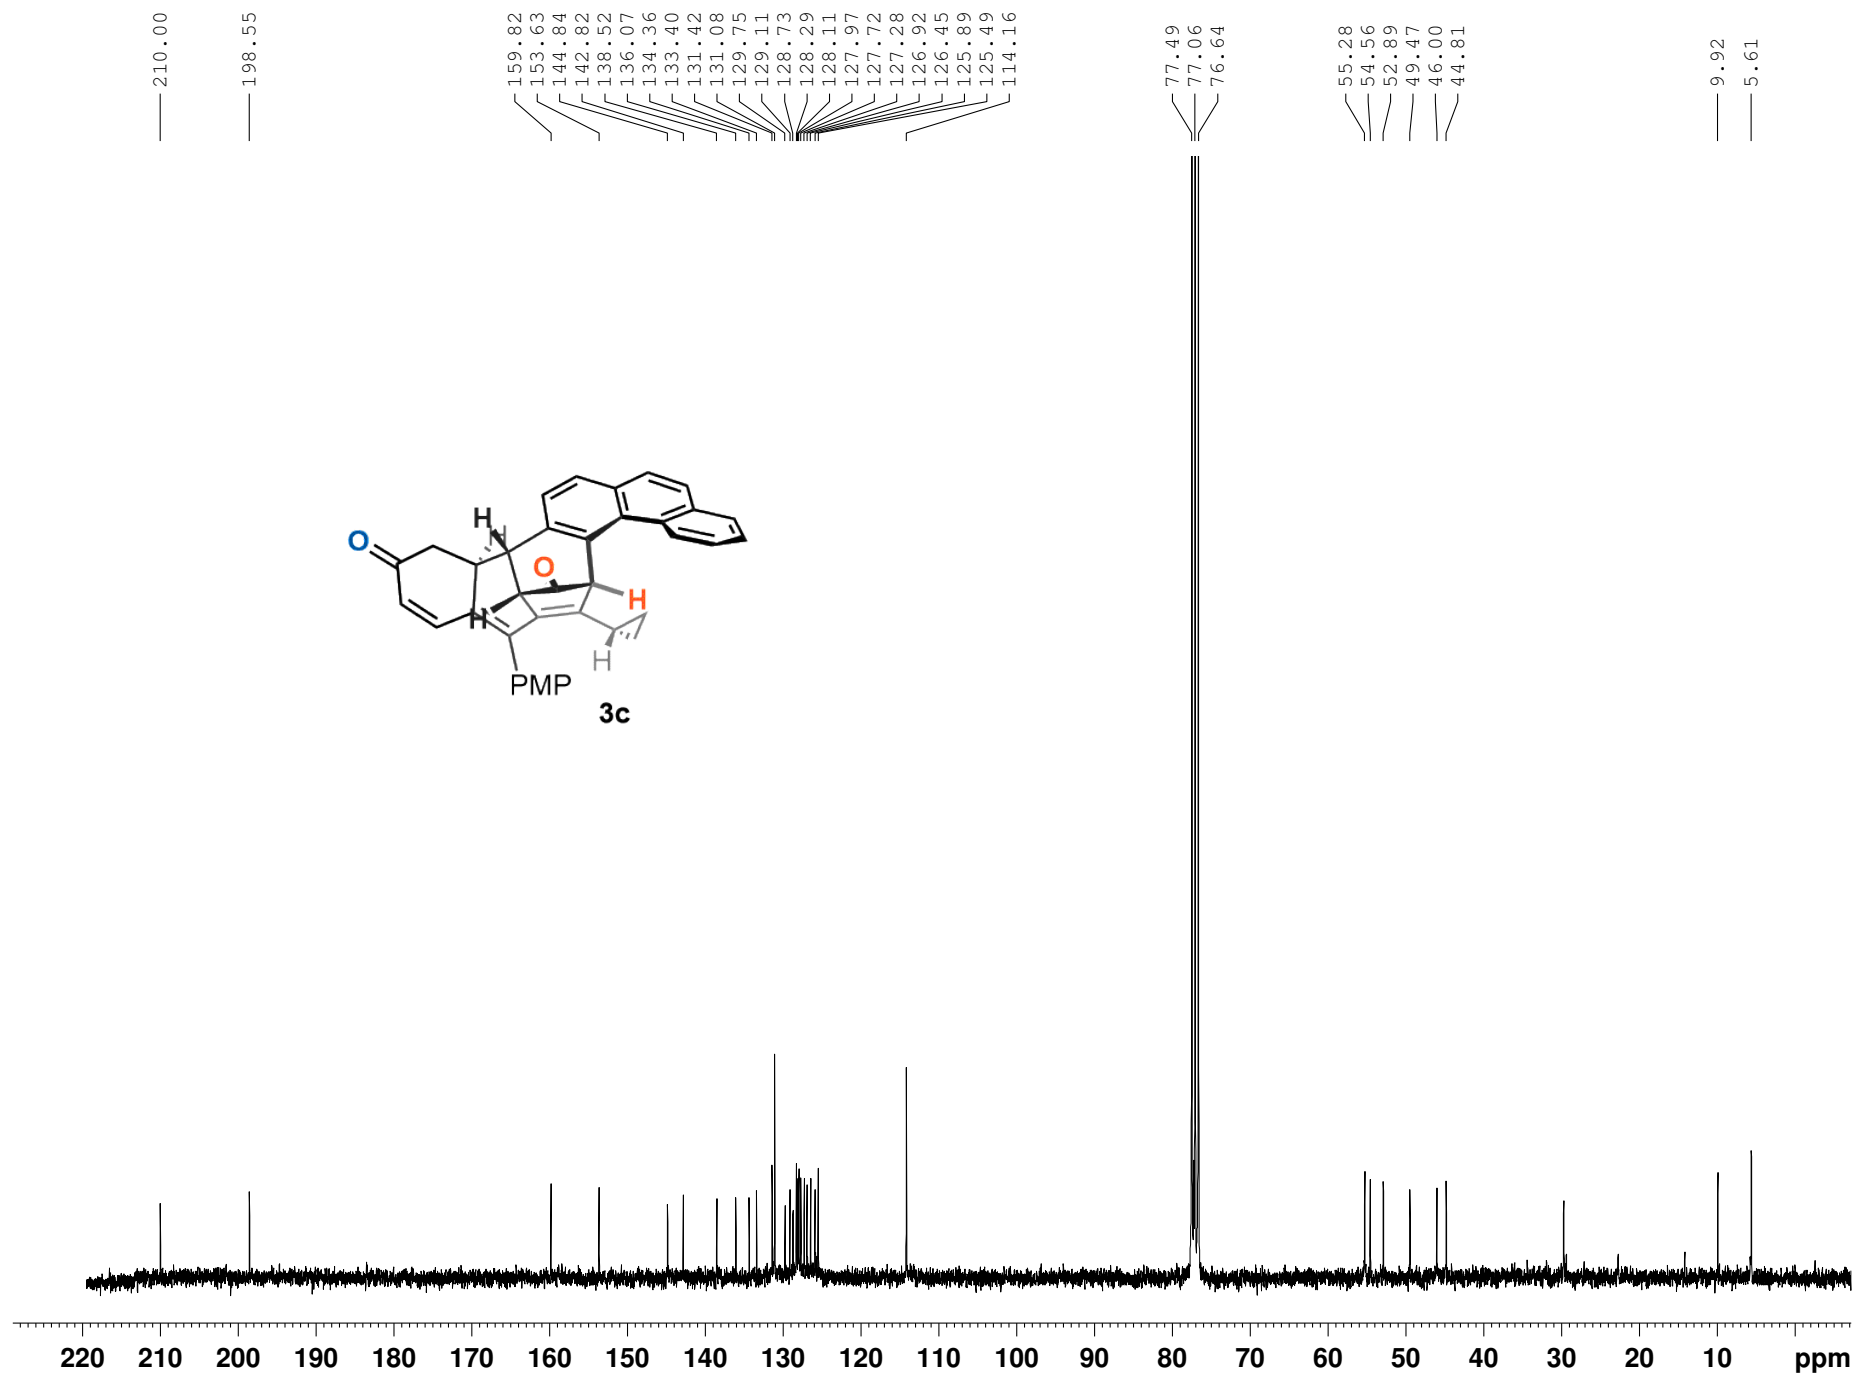

7.831  
7.804  
7.733  
7.708  
7.650  
7.616  
7.586  
7.566  
7.555  
7.538  
7.503  
7.476  
7.266  
7.240  
6.910  
6.884

6.012  
5.978

4.410  
3.858  
3.838  
3.759  
3.726  
3.693  
3.504  
3.490  
3.002  
2.970  
2.773

0.517  
0.489  
0.474  
0.459  
0.430  
0.080  
0.044  
0.014  
-0.000  
-0.016  
-0.045  
-0.202  
-0.218  
-0.232  
-0.249  
-0.394  
-0.424  
-0.440  
-0.456  
-0.487  
-1.315  
-1.332  
-1.348  
-1.363  
-1.380  
-1.396

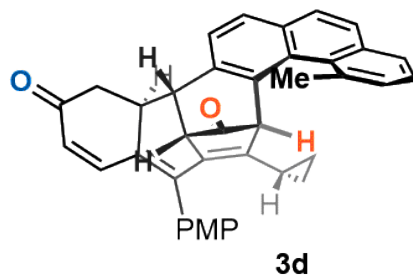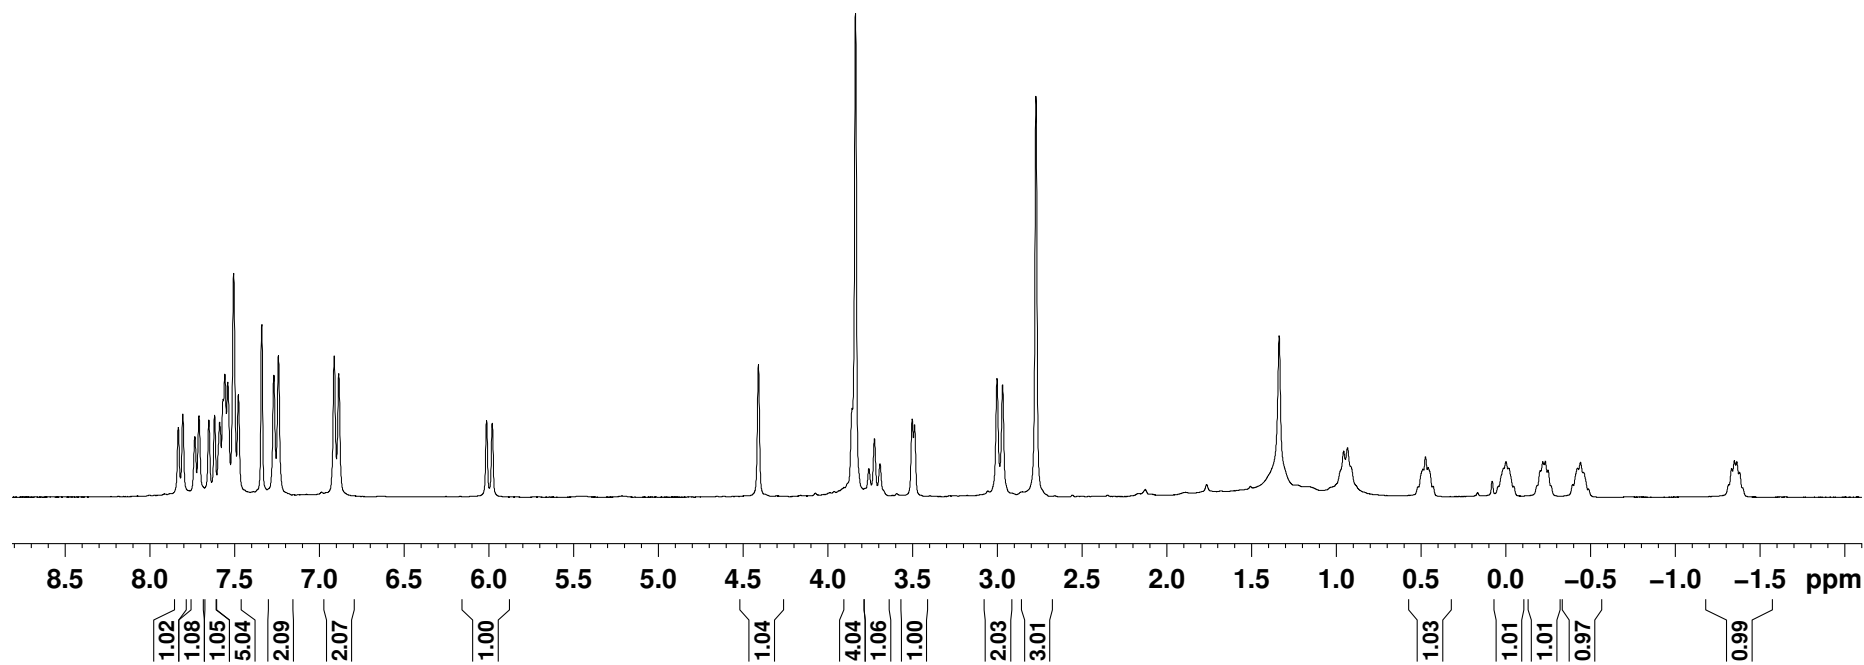

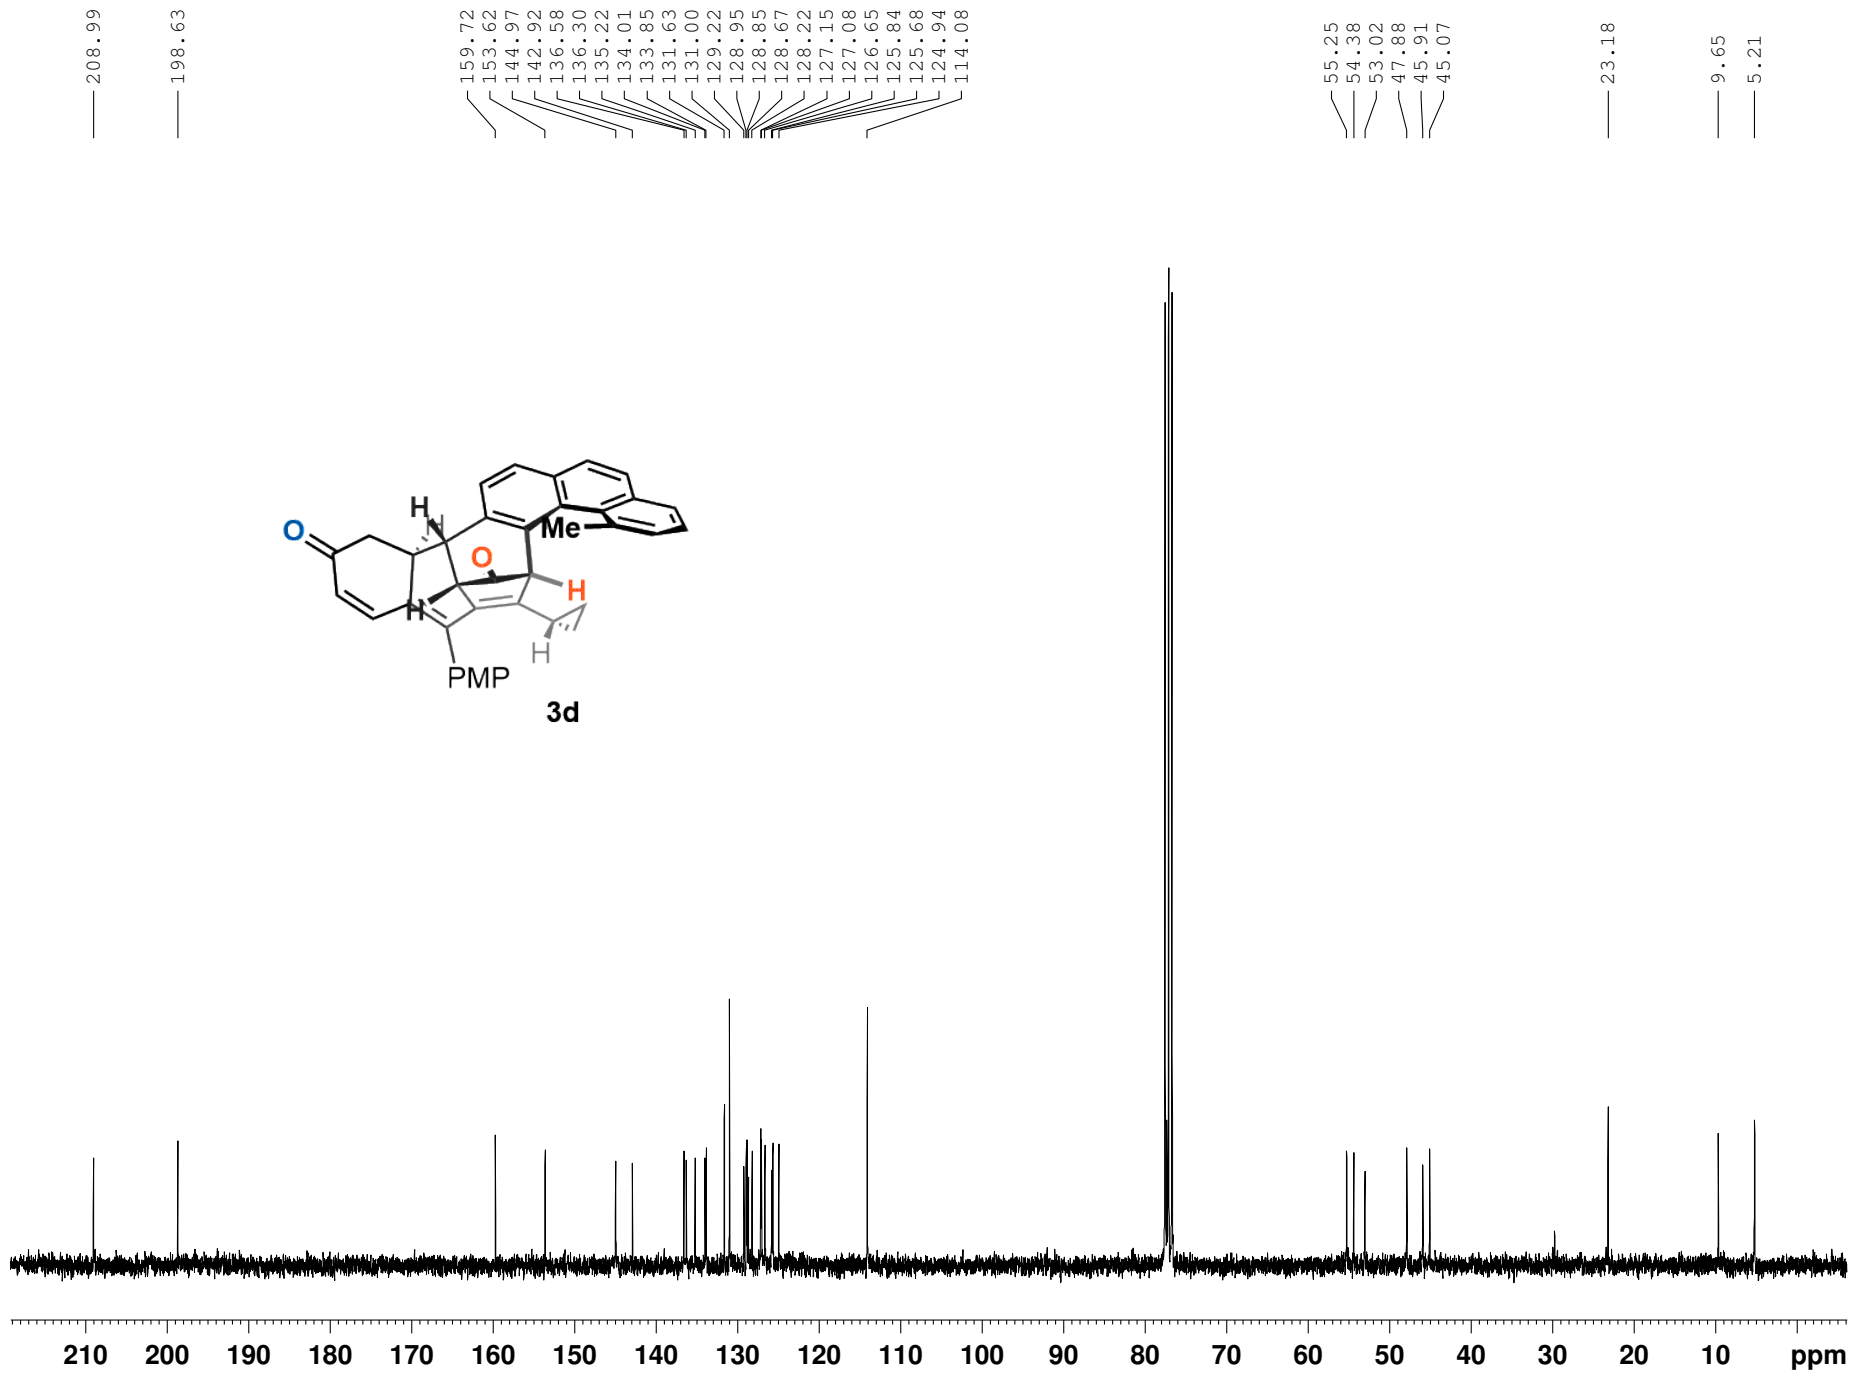

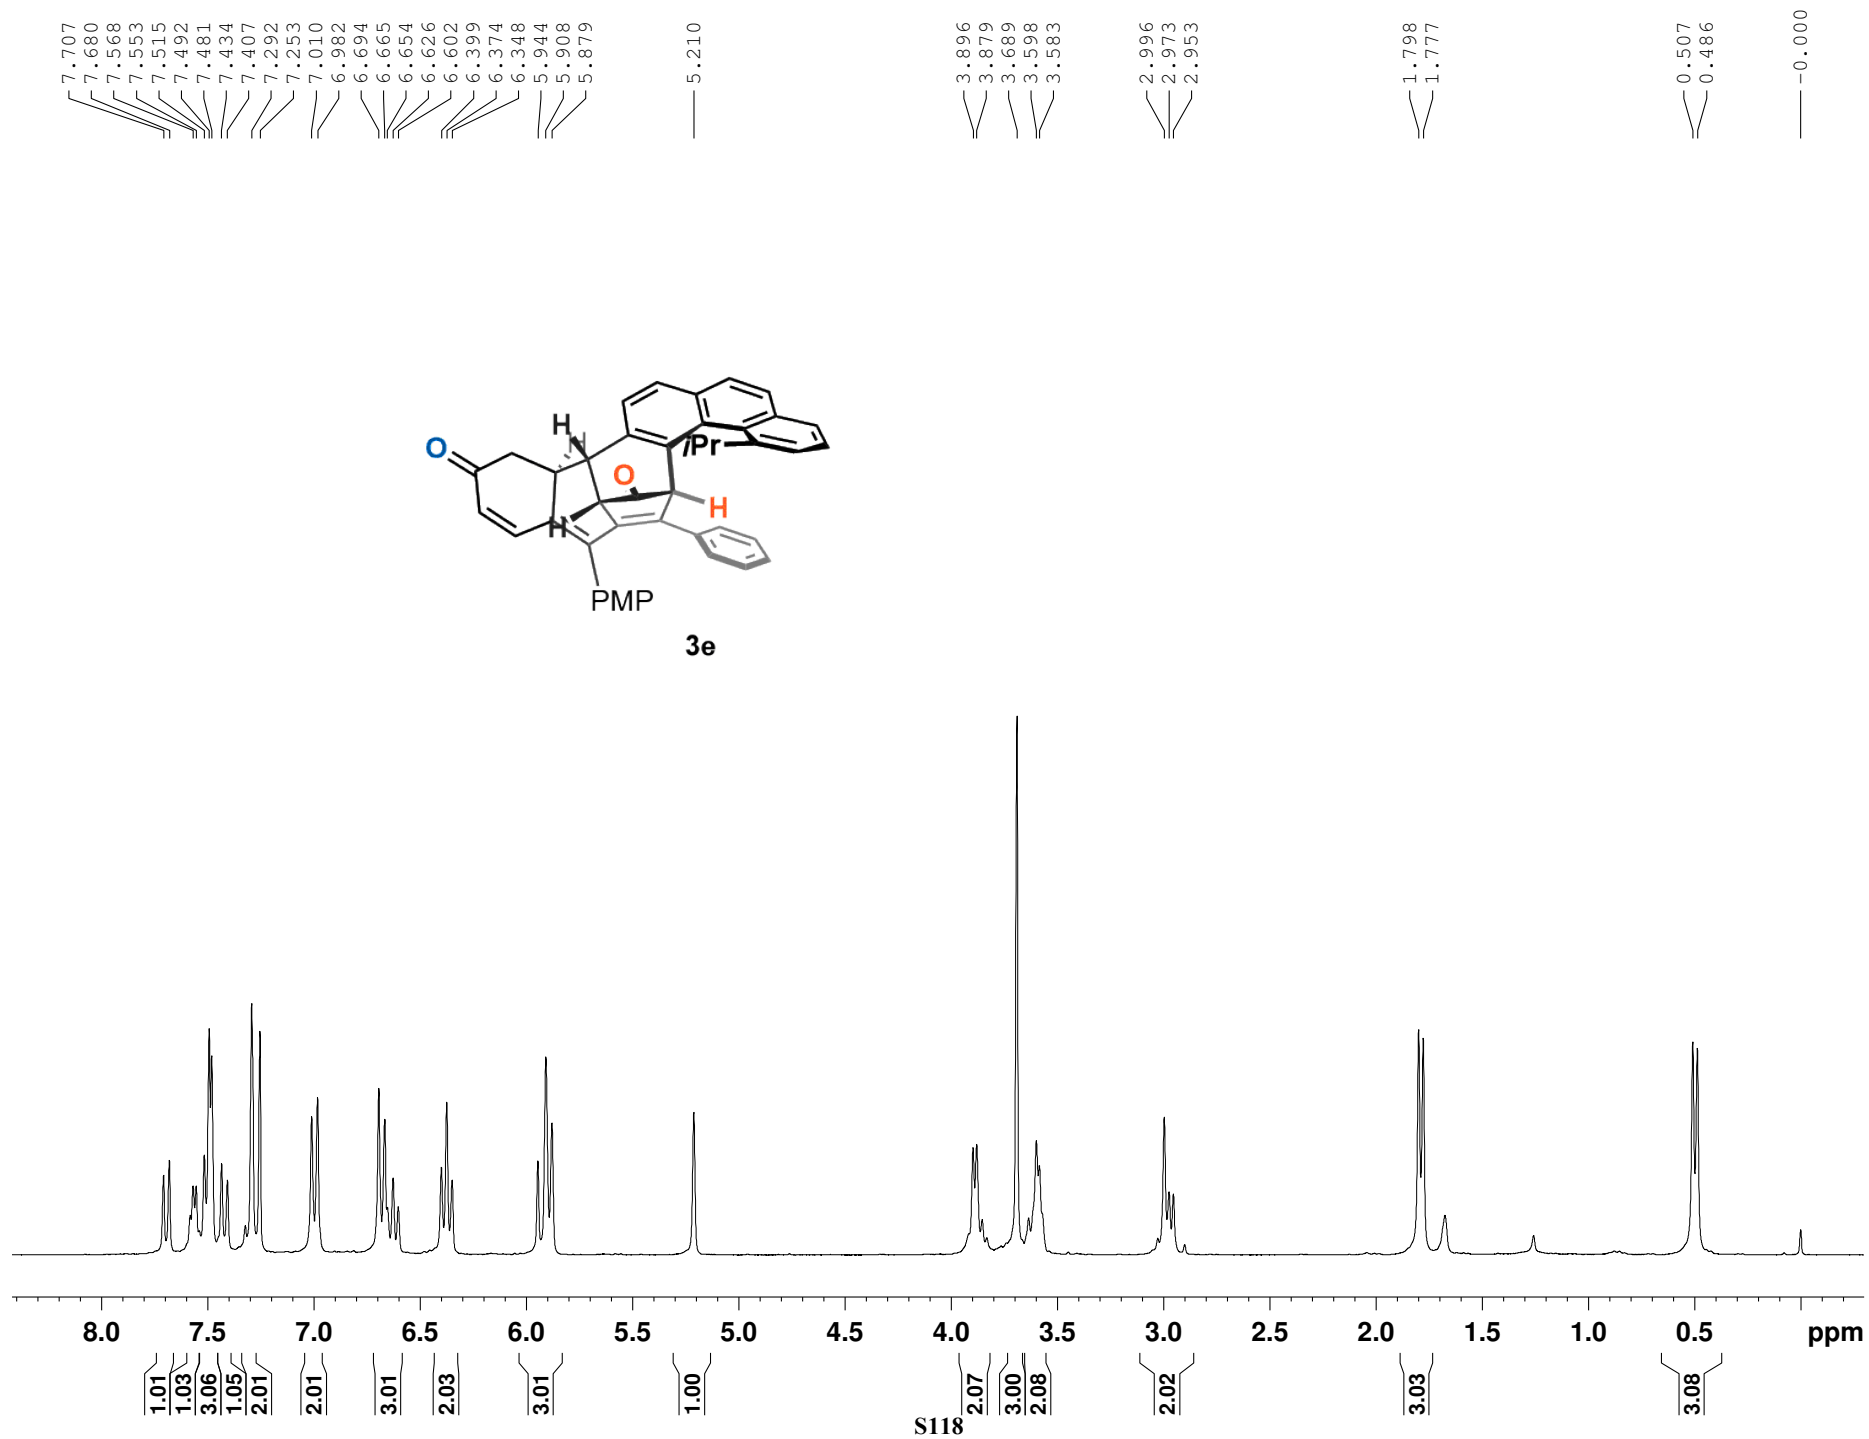

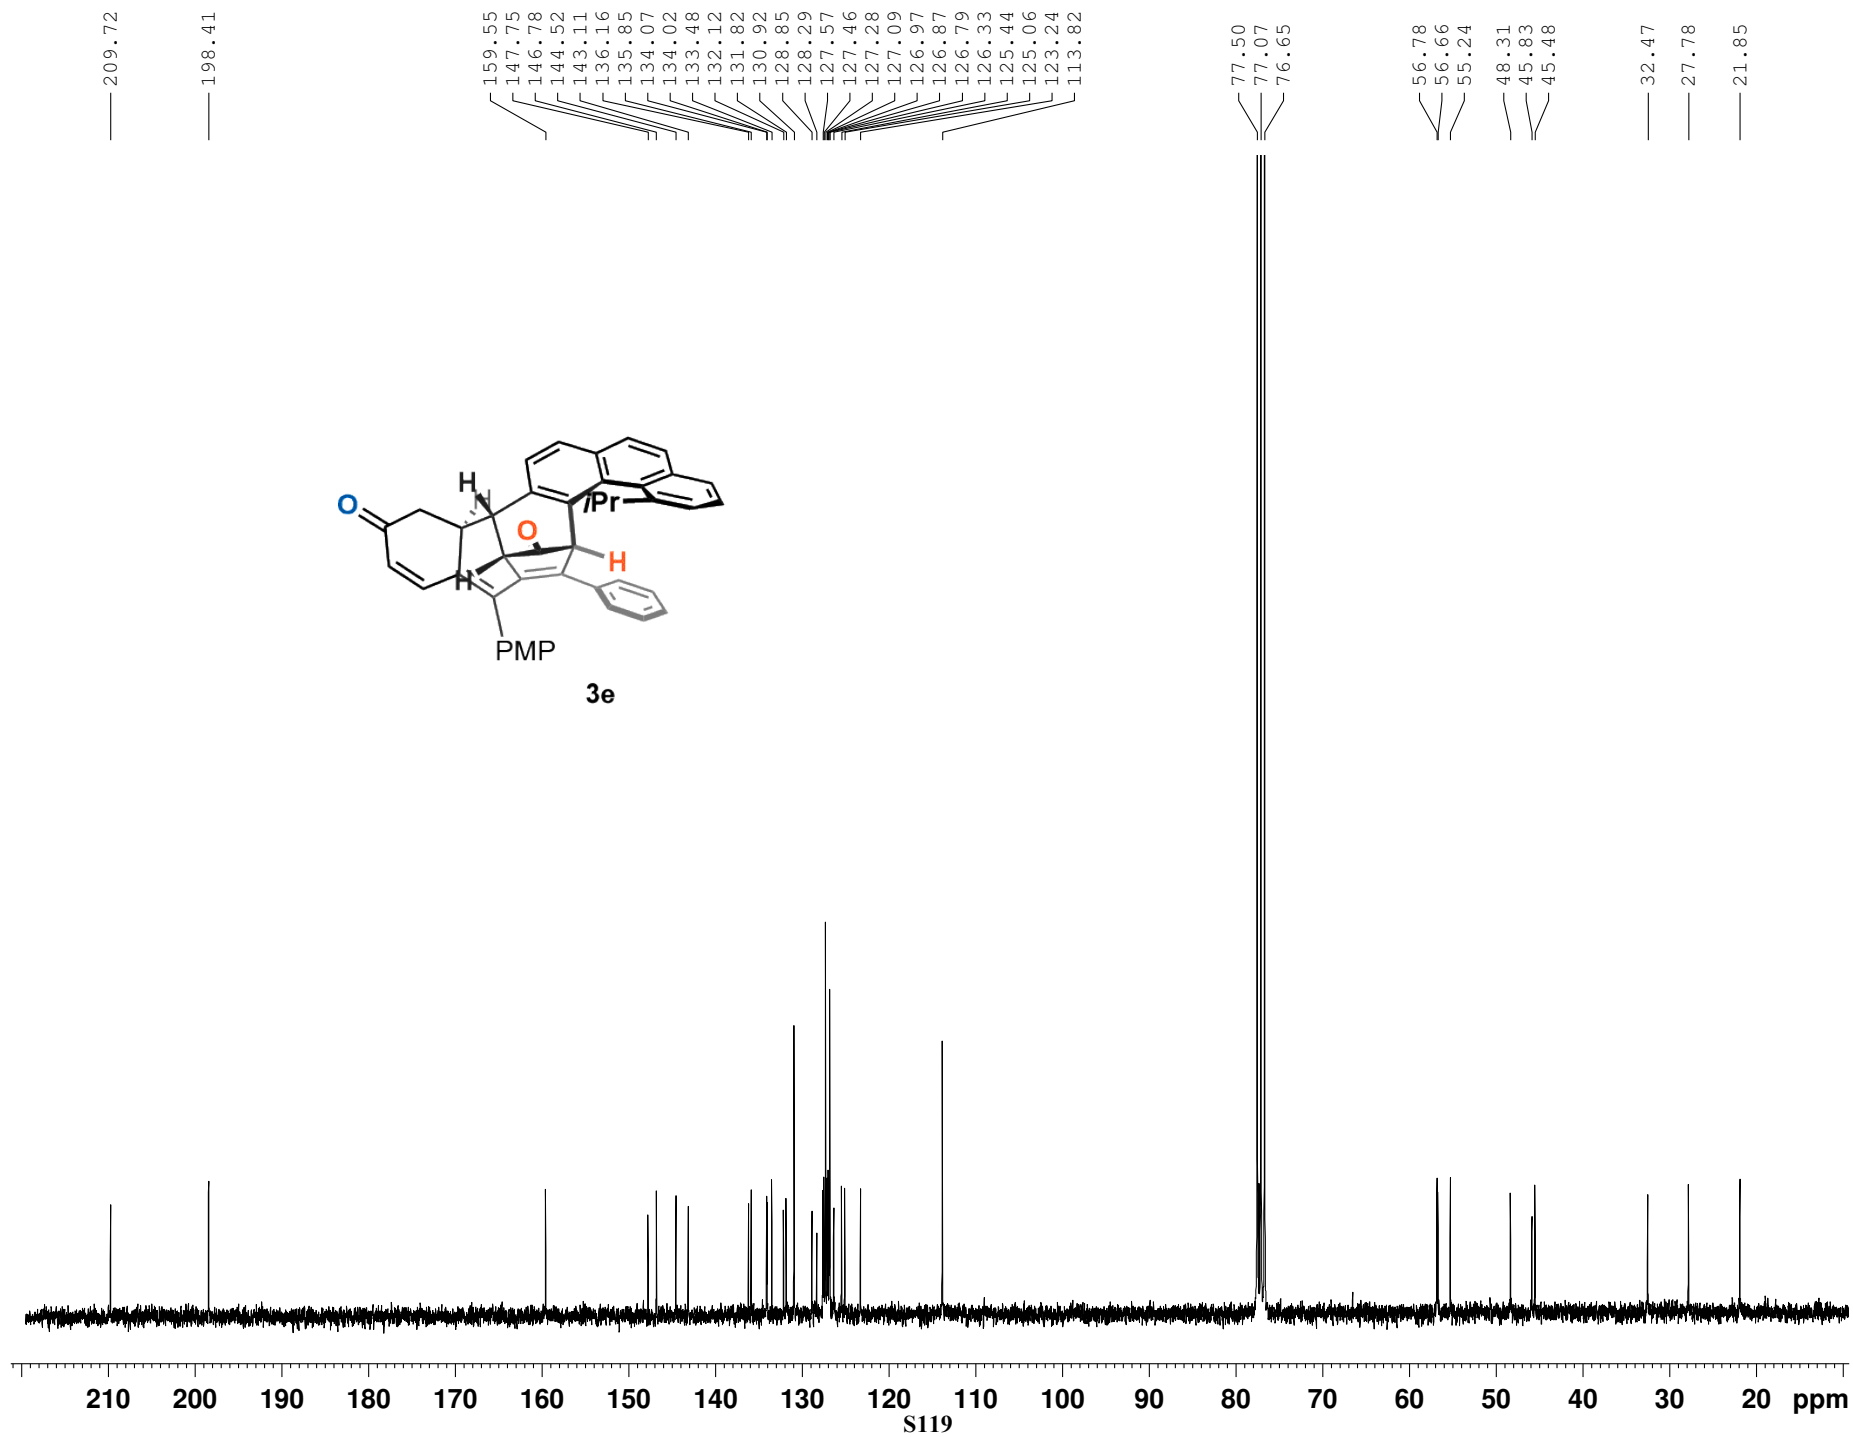



7.686  
7.660  
7.589  
7.569  
7.526  
7.504  
7.488  
7.421  
7.394  
7.344  
7.316  
7.291  
7.261  
7.246  
7.046  
7.019  
6.737  
6.710  
6.183  
6.157  
5.939  
5.905  
5.810  
5.784

5.196

3.908  
3.885  
3.869  
3.708  
3.611  
3.584  
3.569  
3.547  
2.993  
2.974  
2.947

1.903  
1.795  
1.774

1.258

0.509  
0.488

-0.000

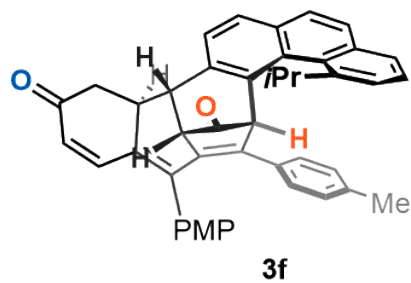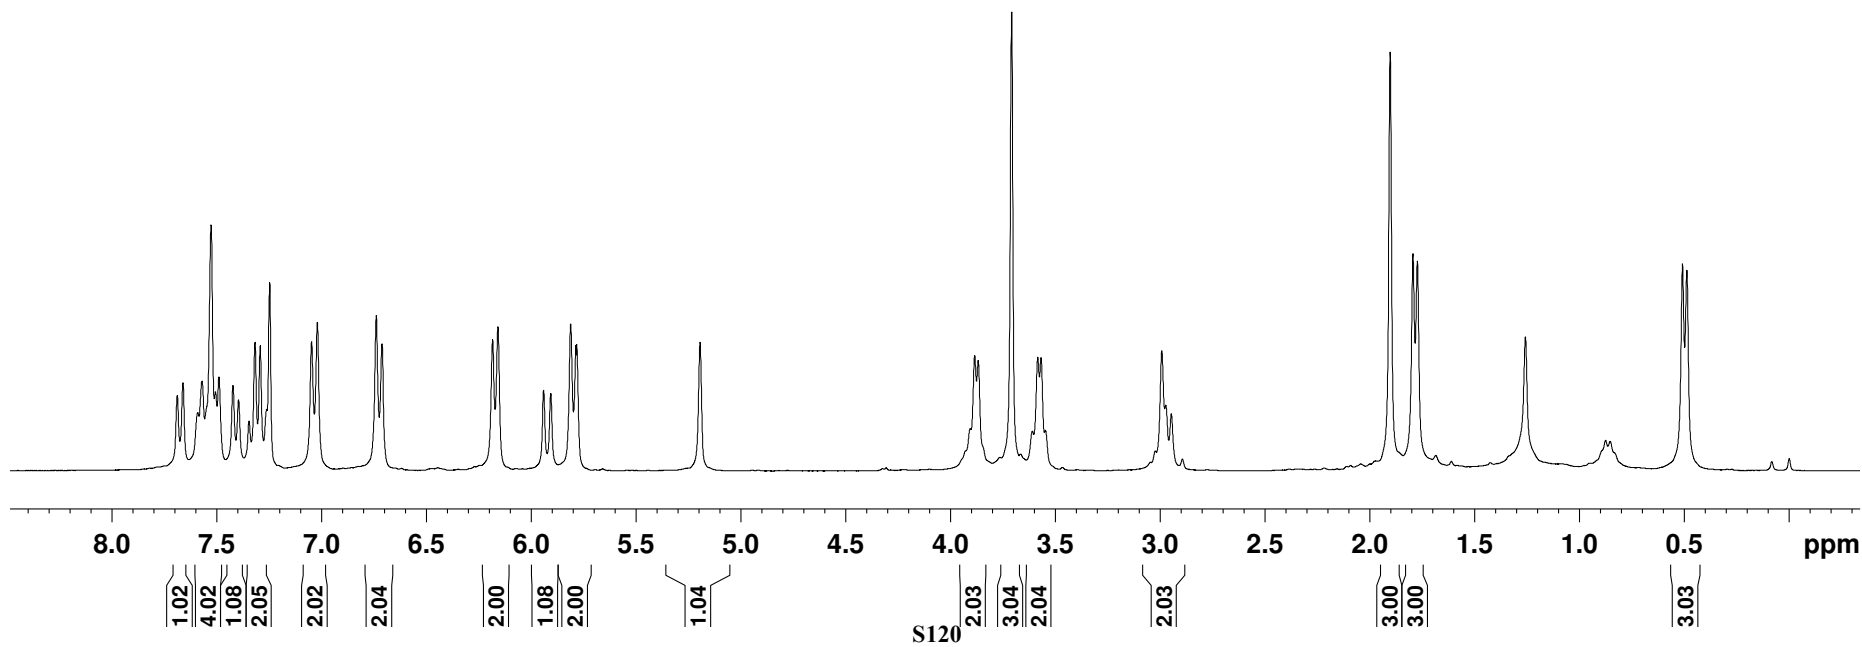

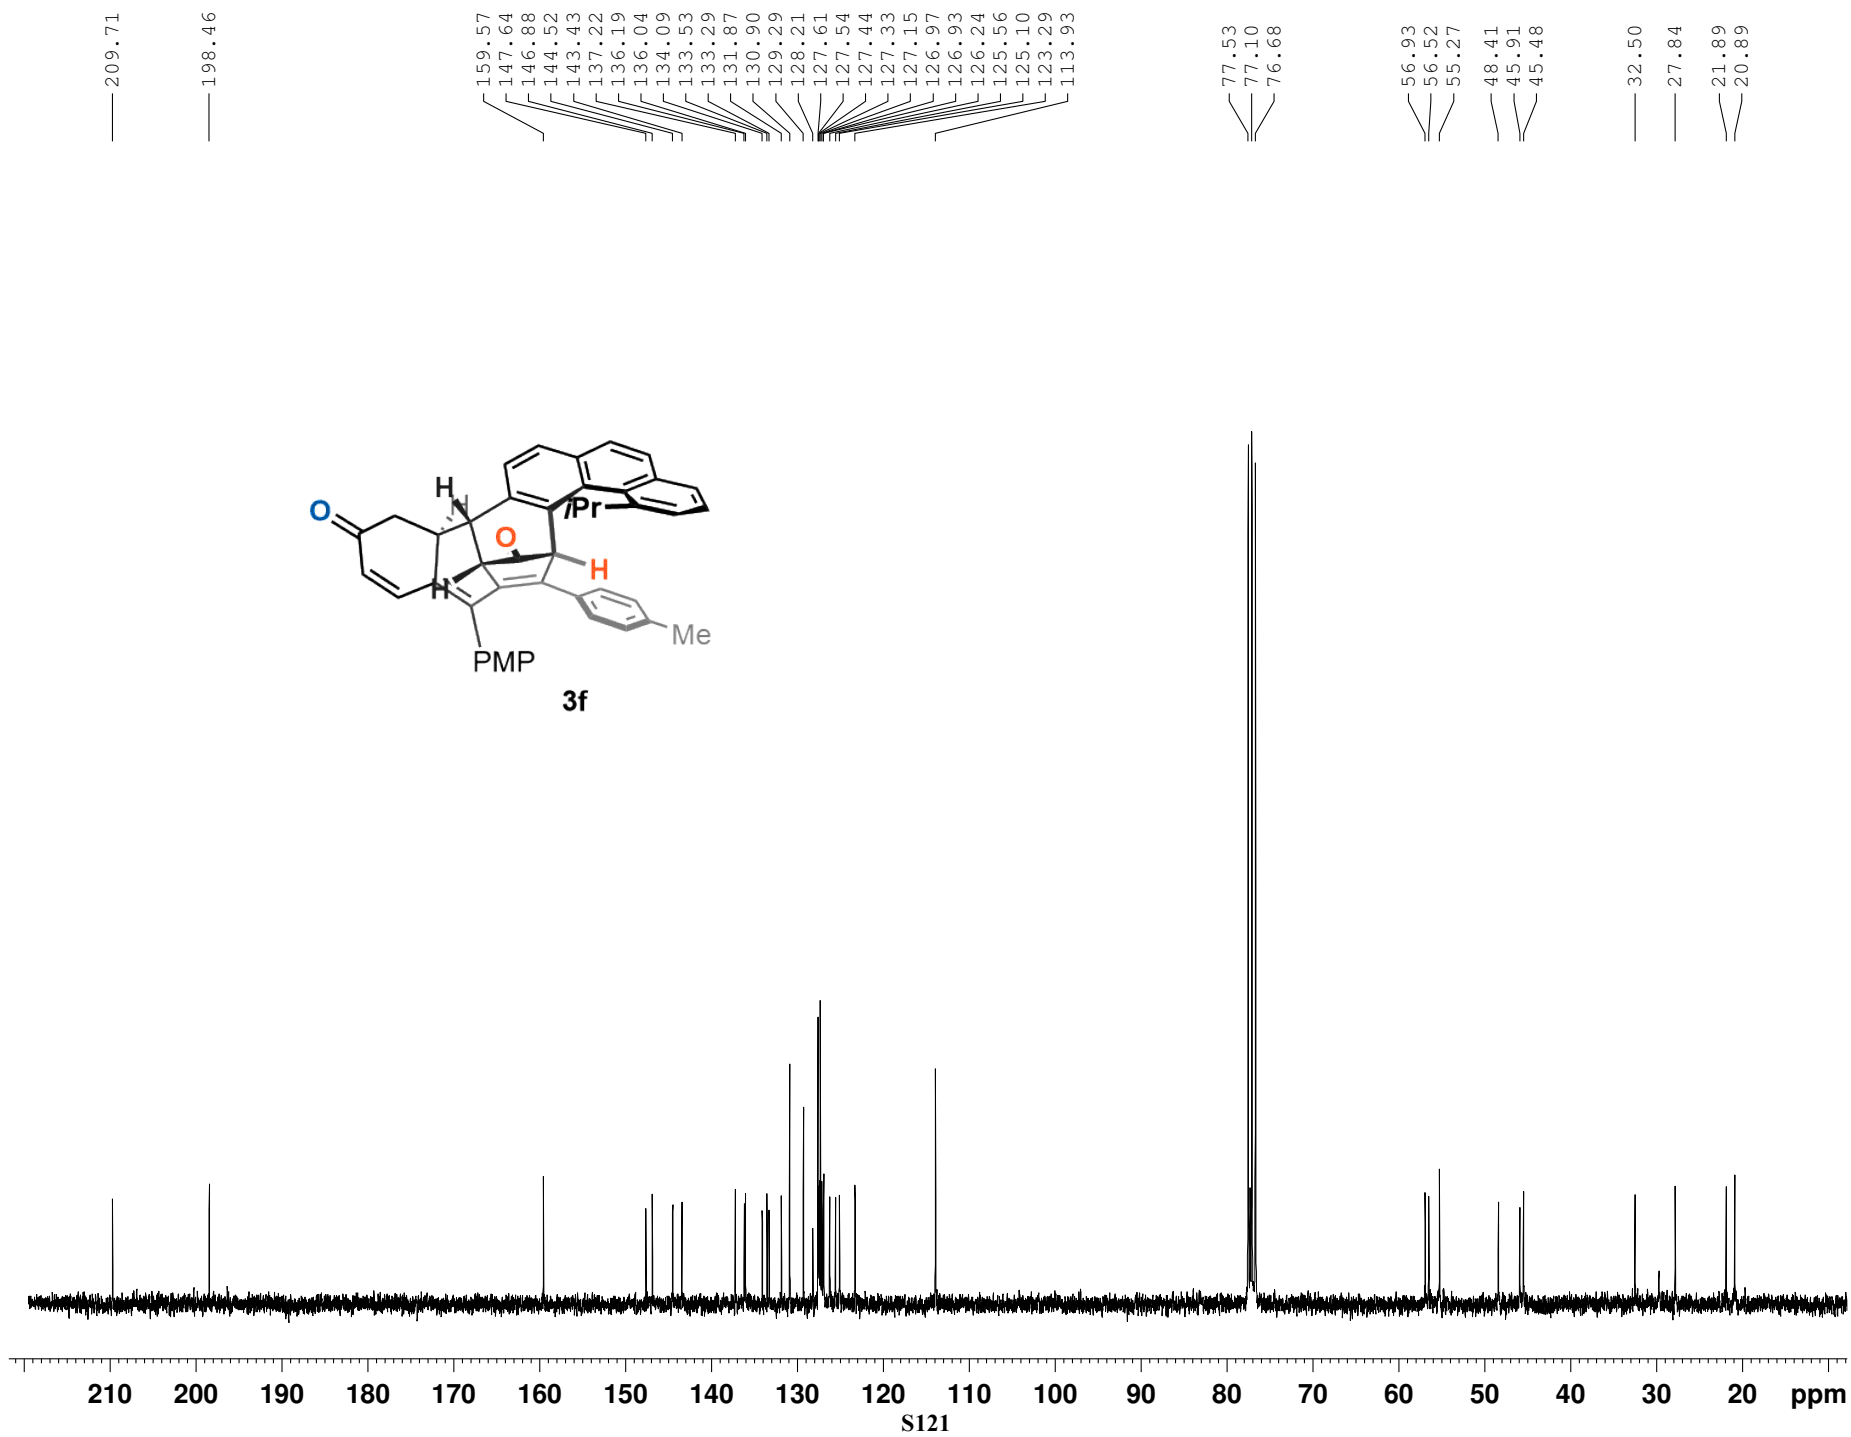

7.687  
7.660  
7.576  
7.561  
7.524  
7.505  
7.490  
7.420  
7.392  
7.275  
7.250  
7.029  
7.001  
6.707  
6.678

6.183  
6.157  
5.938  
5.904  
5.827  
5.800

5.203

3.883  
3.868  
3.694  
3.583  
3.569

2.990  
2.967  
2.947

2.189  
2.165  
2.140

1.800  
1.778

1.266  
1.243  
1.218  
1.061  
1.036  
0.843  
0.820  
0.796  
0.508  
0.486

-0.000

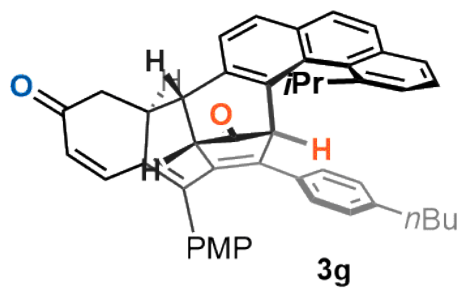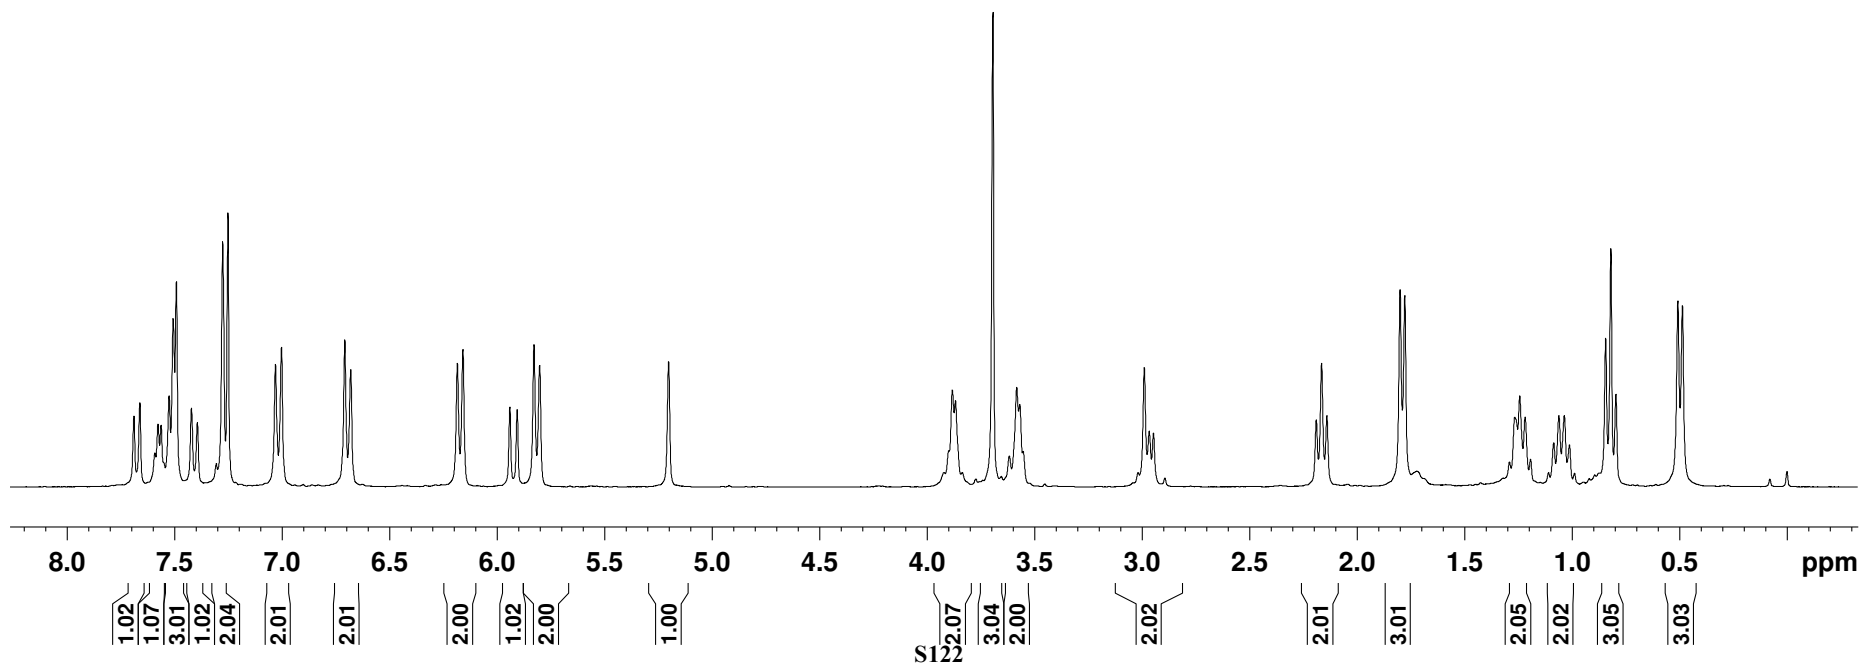

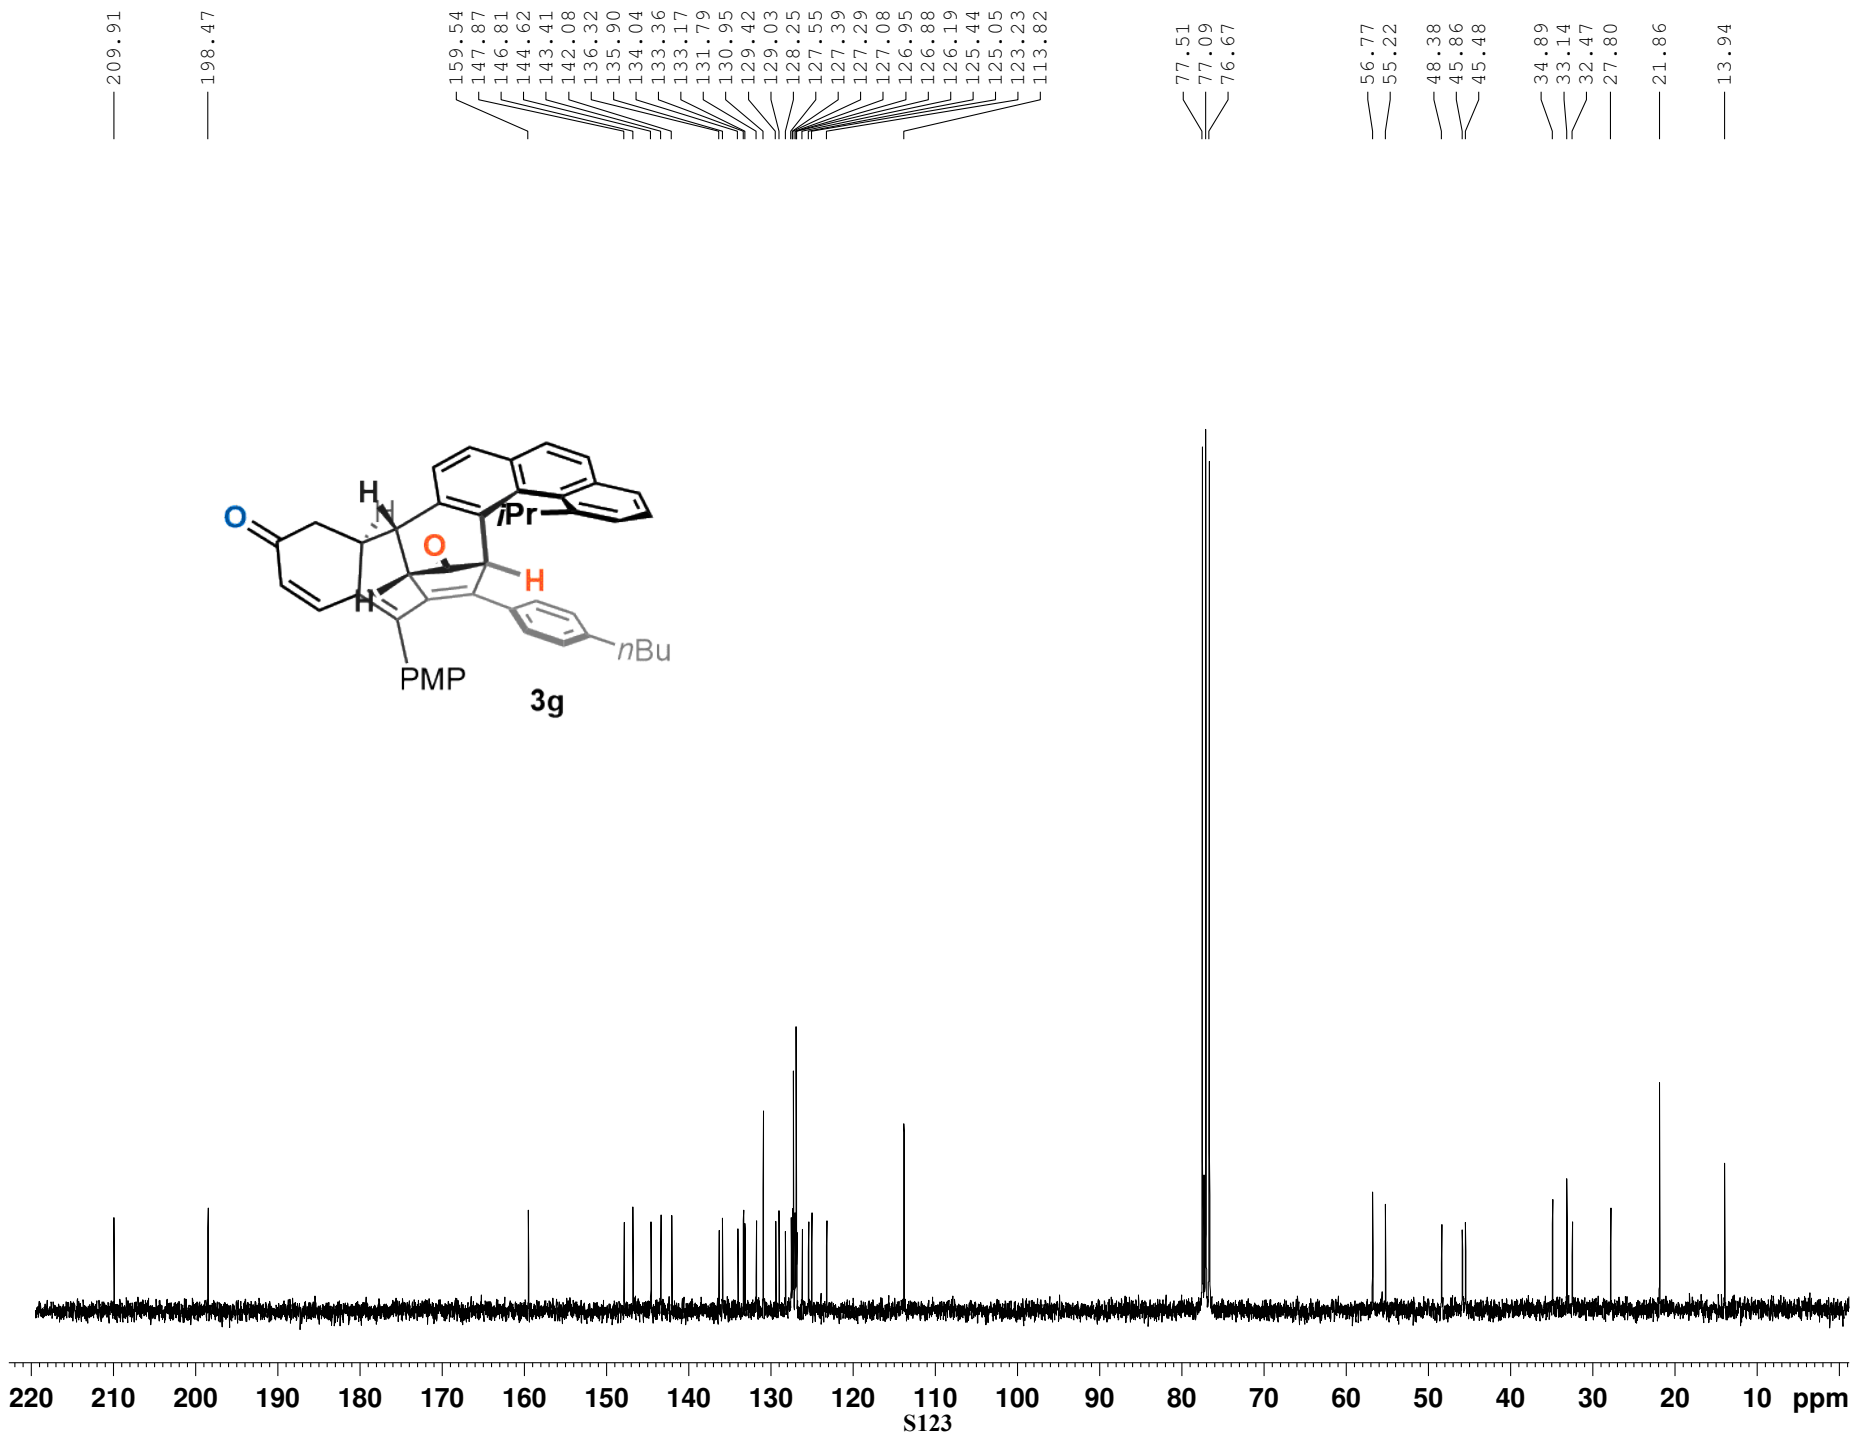

7.687  
7.660  
7.576  
7.562  
7.519  
7.508  
7.491  
7.420  
7.393  
7.279  
7.248  
7.031  
7.003  
6.711  
6.683

6.183  
6.156  
5.937  
5.903  
5.826  
5.800

5.203

3.883  
3.868  
3.694  
3.583  
3.569

2.990  
2.967  
2.947

2.180  
2.155  
2.130

1.799  
1.777

1.283  
1.259  
1.237  
1.215  
1.191  
1.046  
1.022  
0.864  
0.840  
0.816  
0.508  
0.486

-0.000

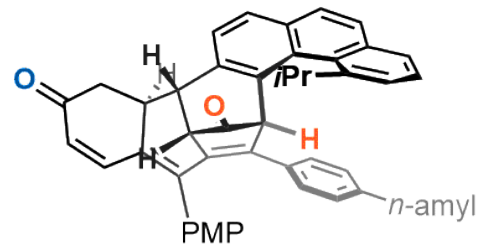

3h

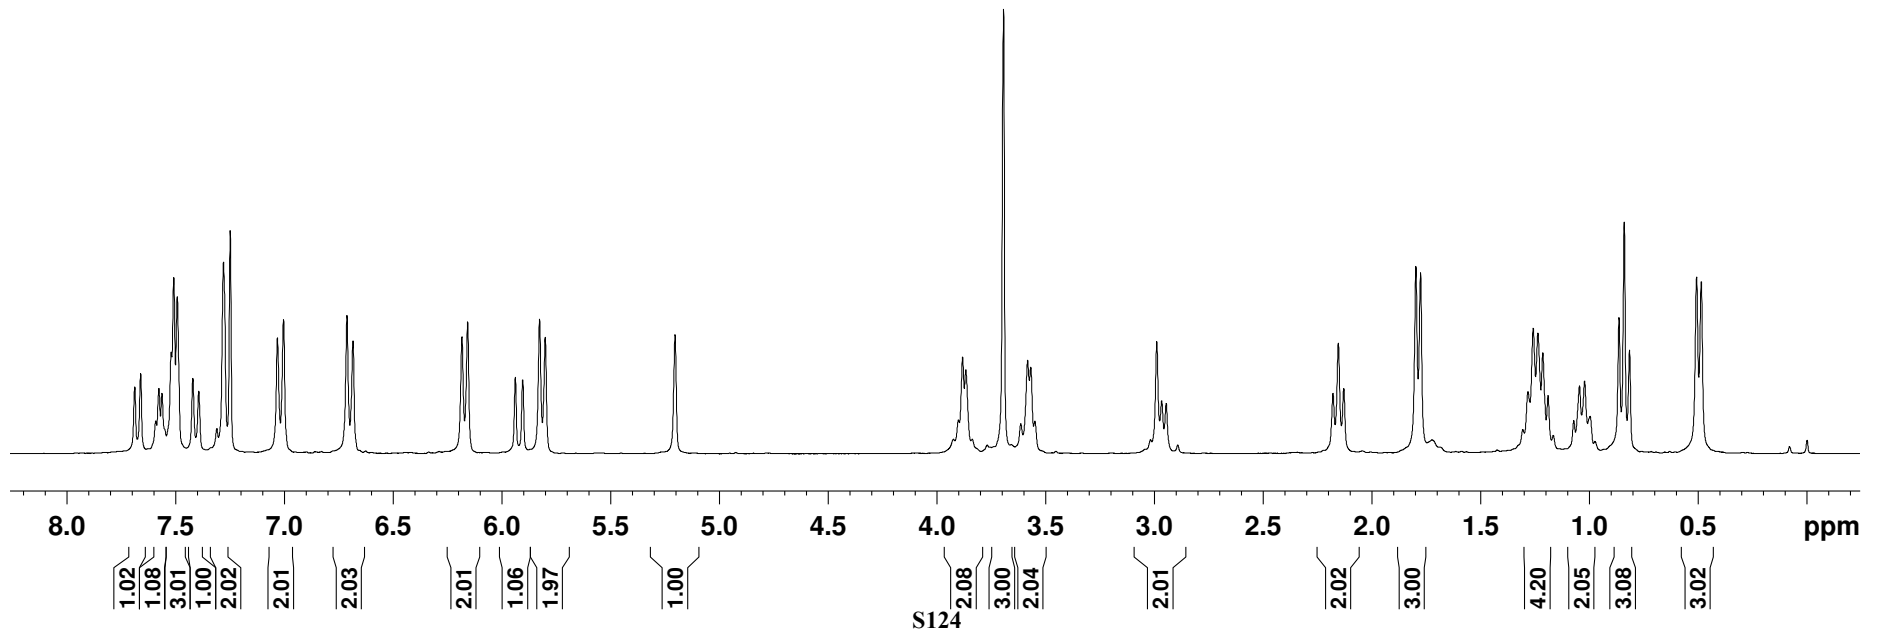

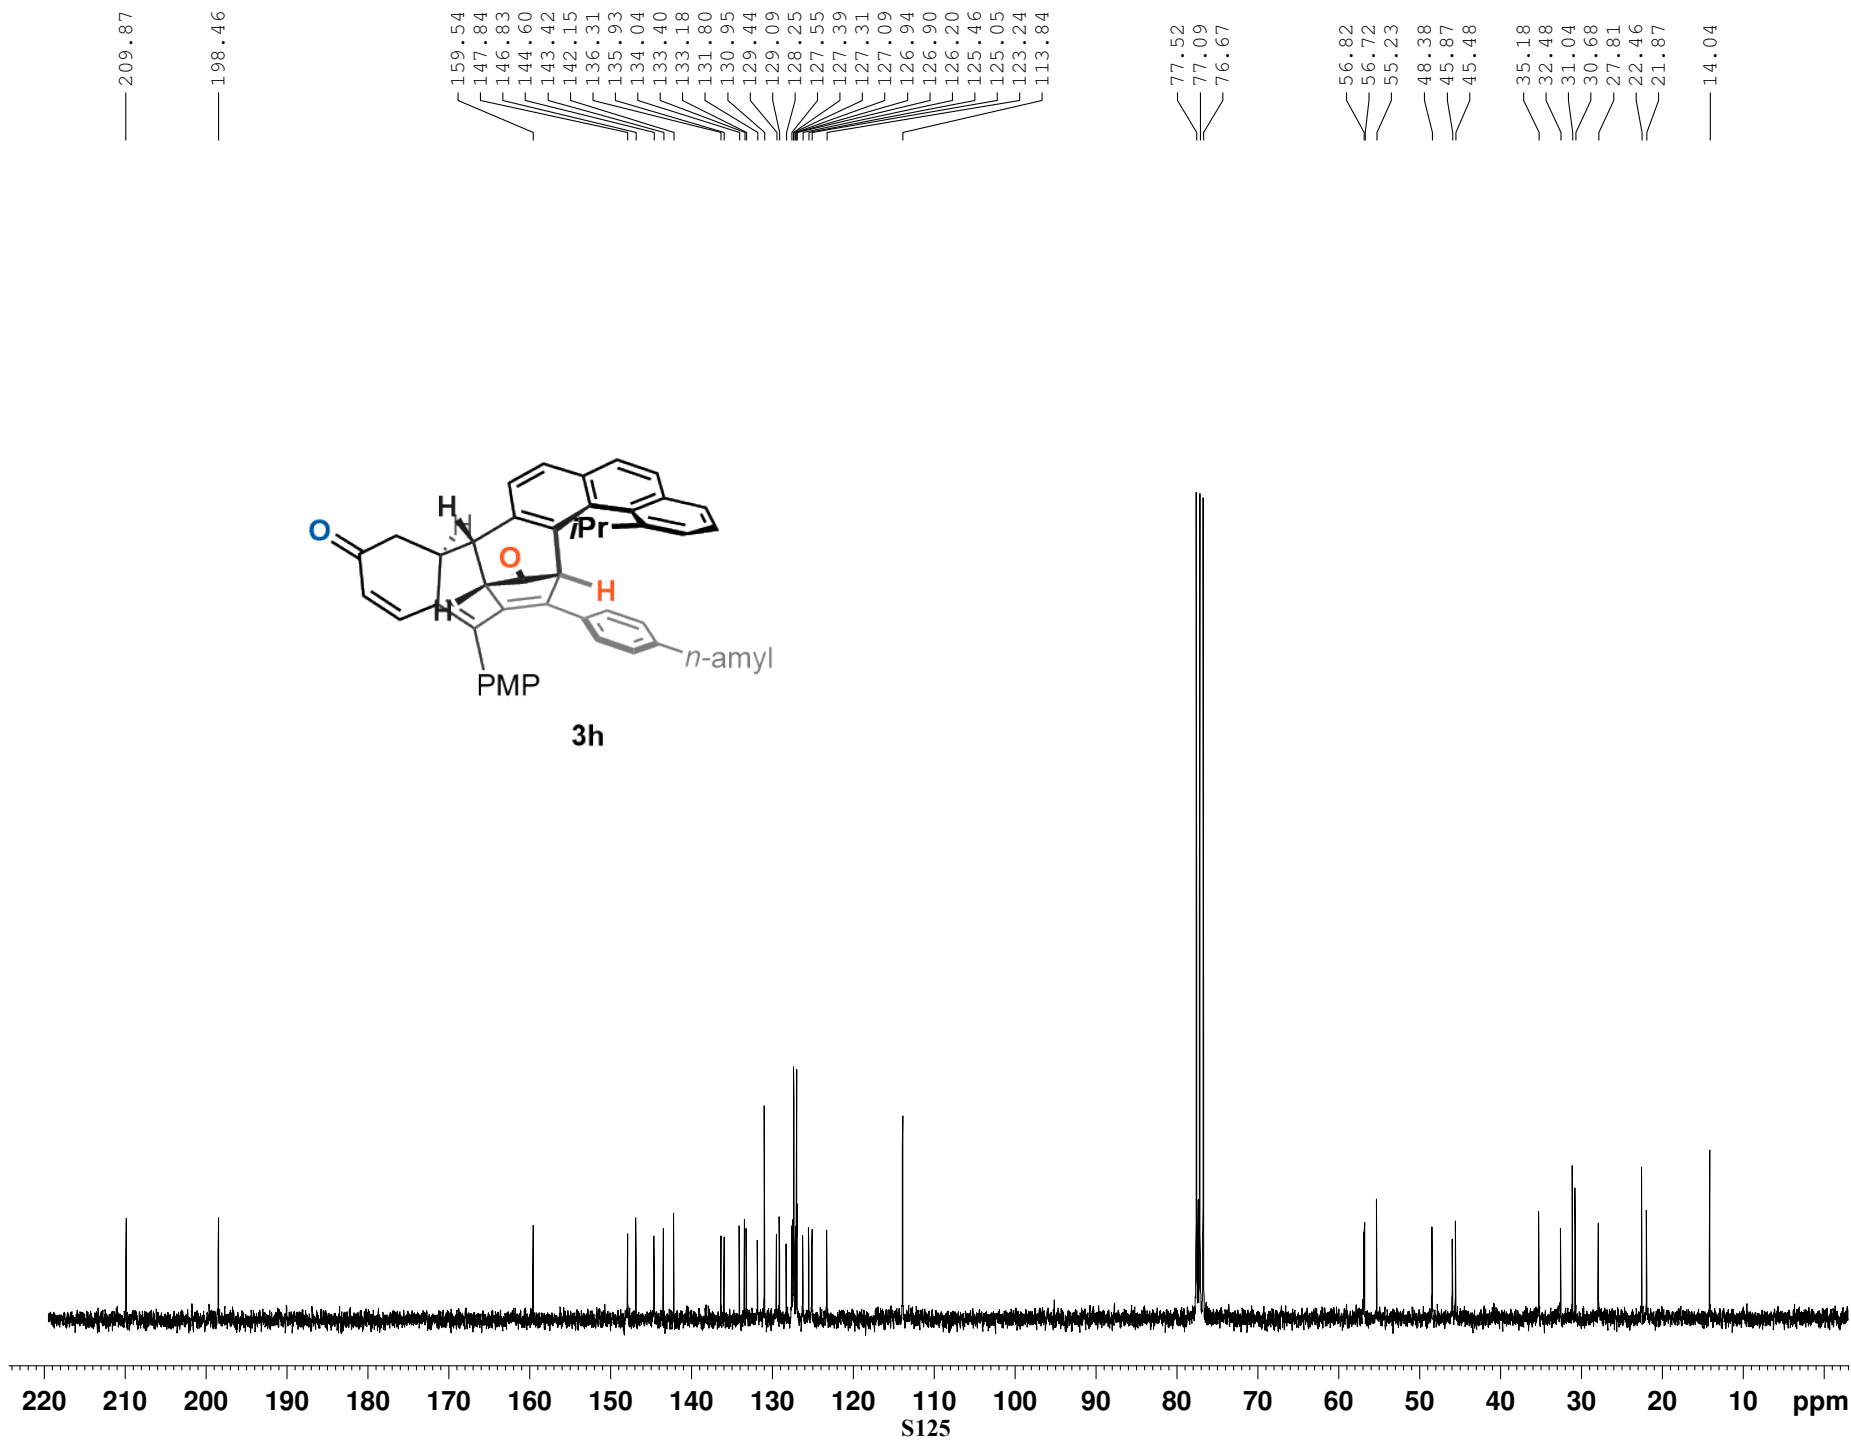

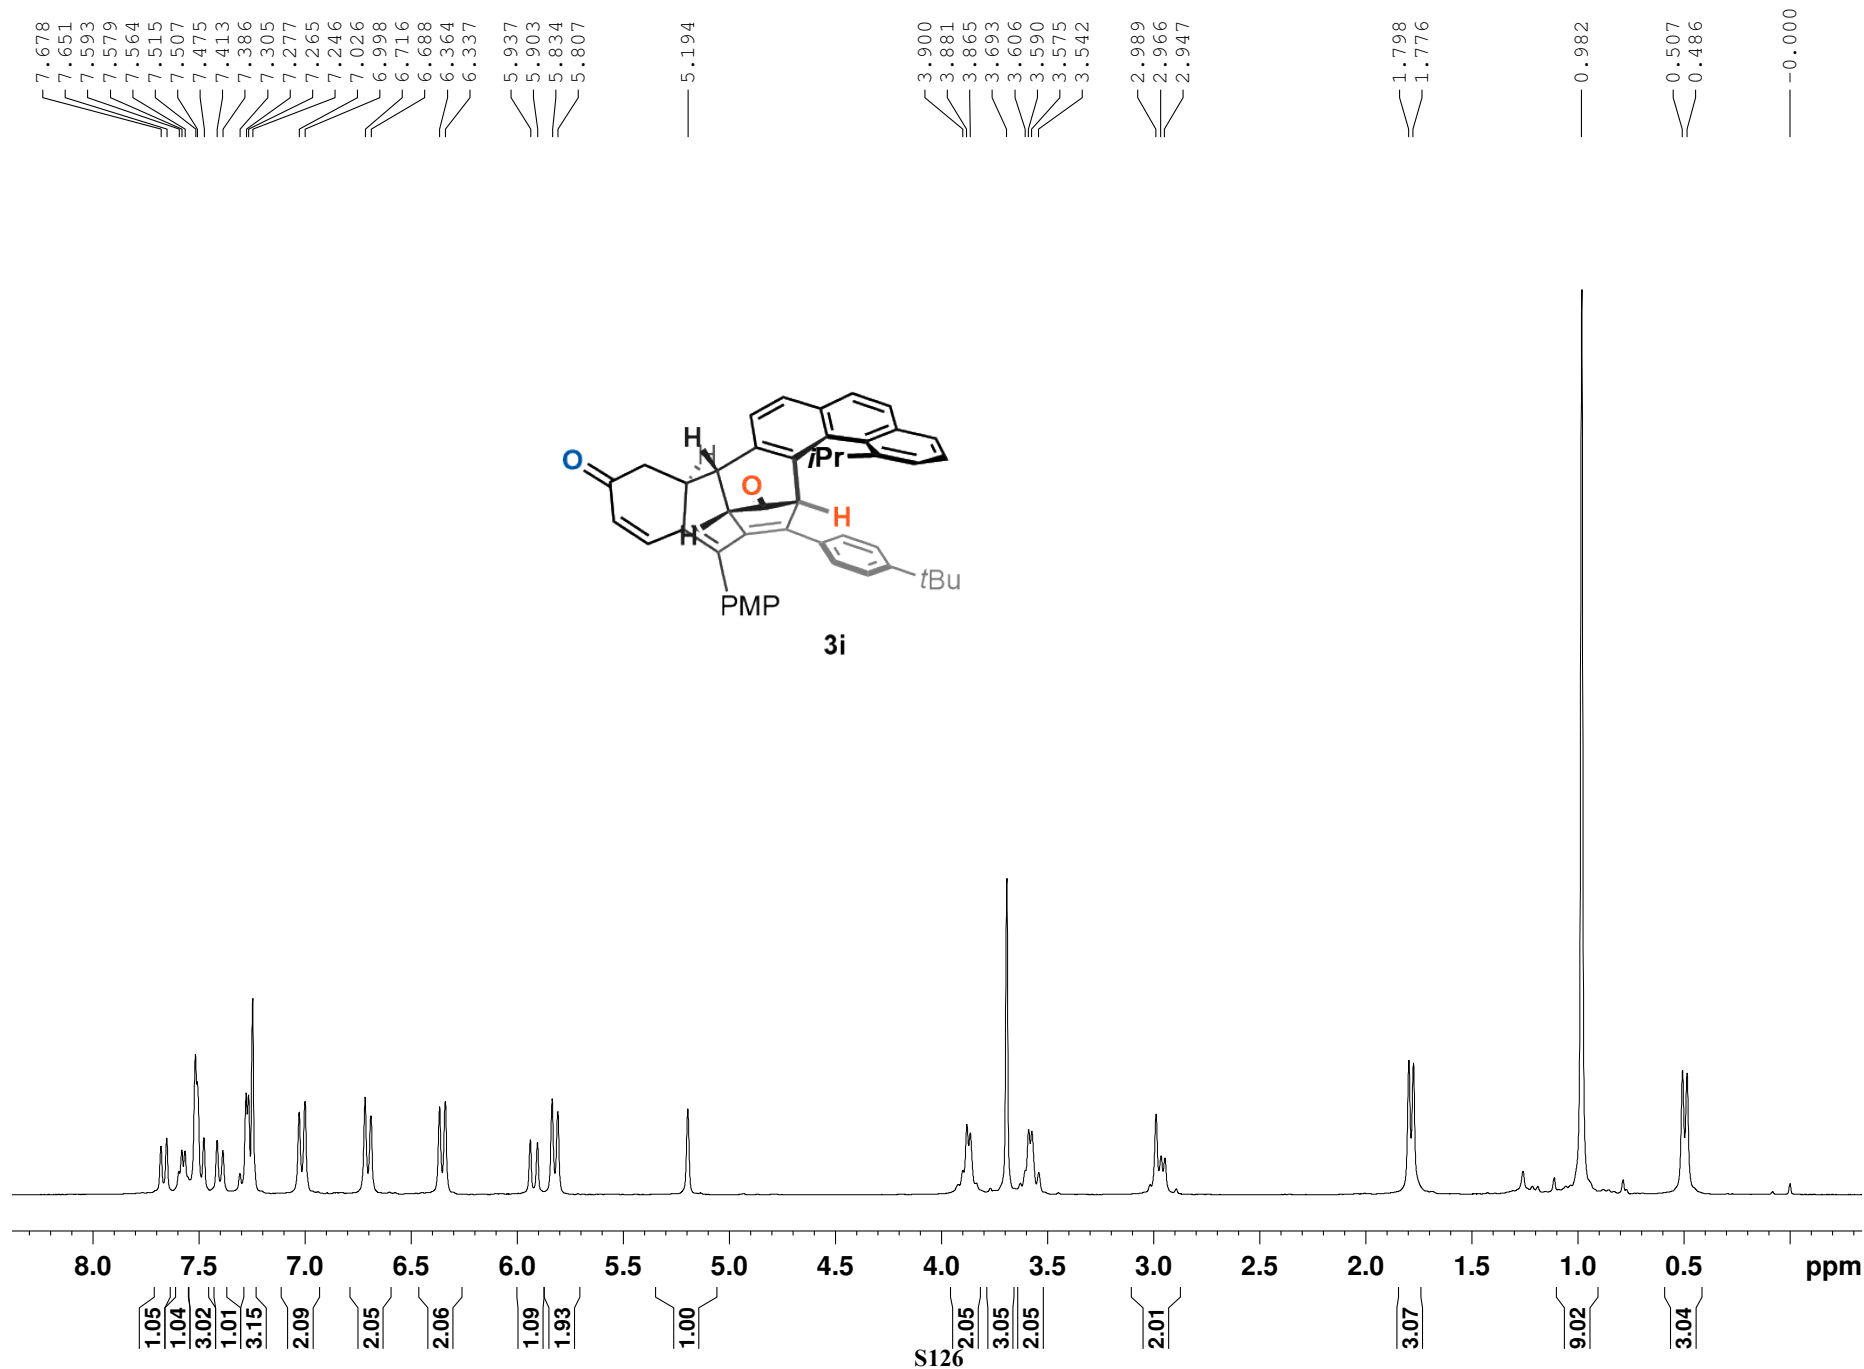

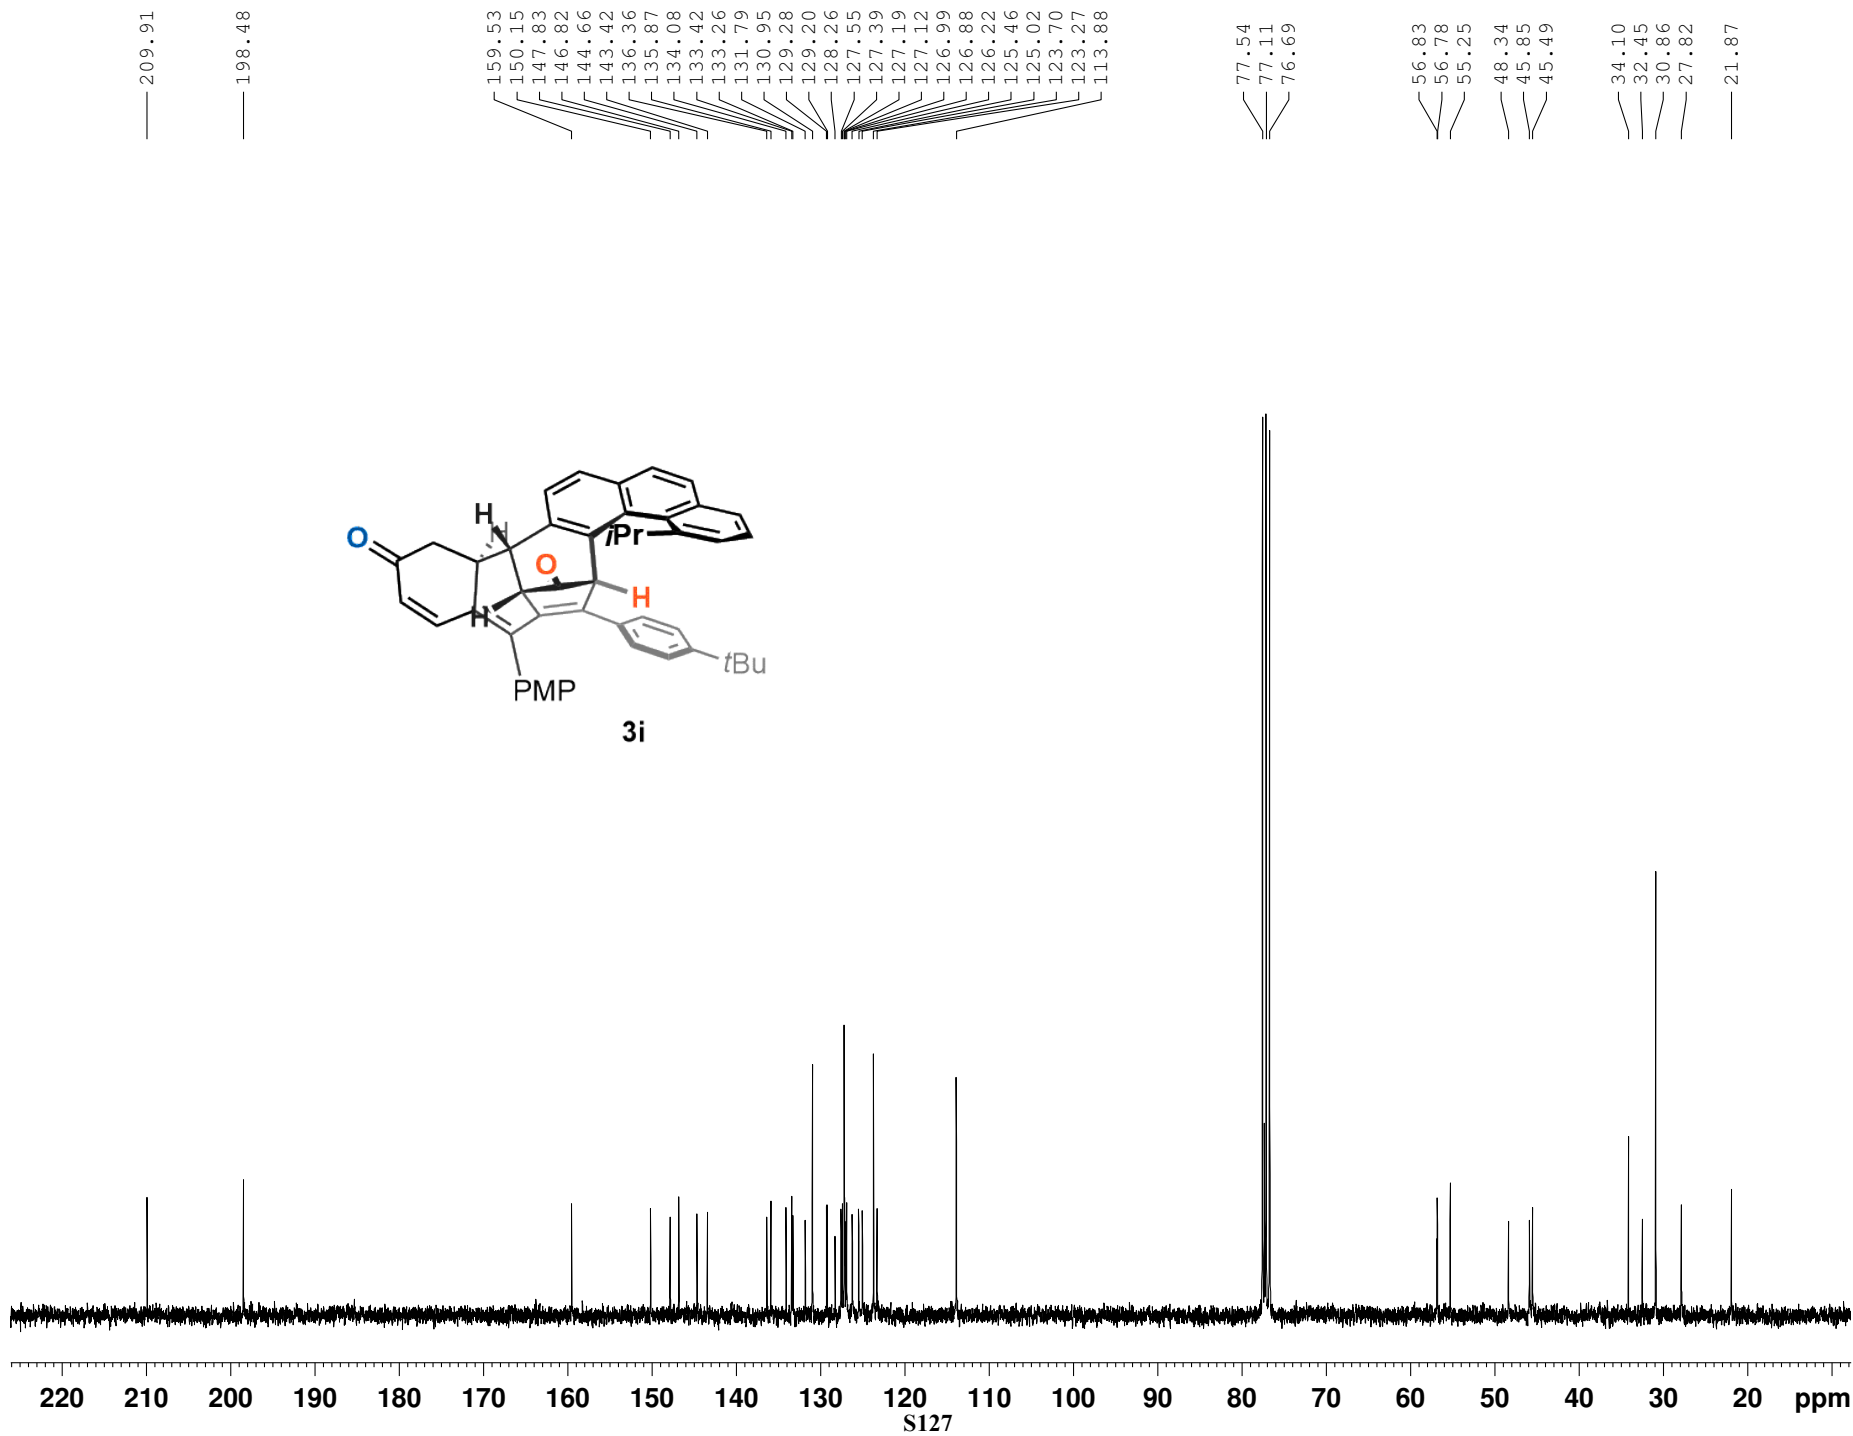



7.697  
7.670  
7.592  
7.578  
7.529  
7.515  
7.499  
7.433  
7.406  
7.290  
7.280  
7.229  
7.142  
7.059  
7.032  
6.726  
6.699  
6.597  
6.571

5.965  
5.941  
5.915

5.256

3.902  
3.885  
3.678  
3.613  
3.598

3.000  
2.982  
2.955  
2.647  
2.622  
2.597  
2.572

1.813  
1.793

1.230  
1.205  
1.180

0.518  
0.497

-0.000

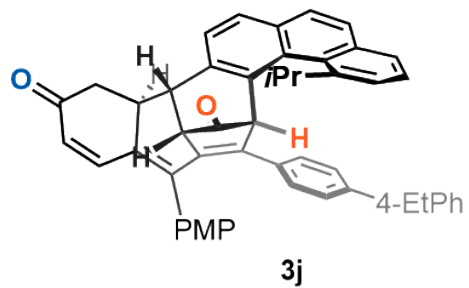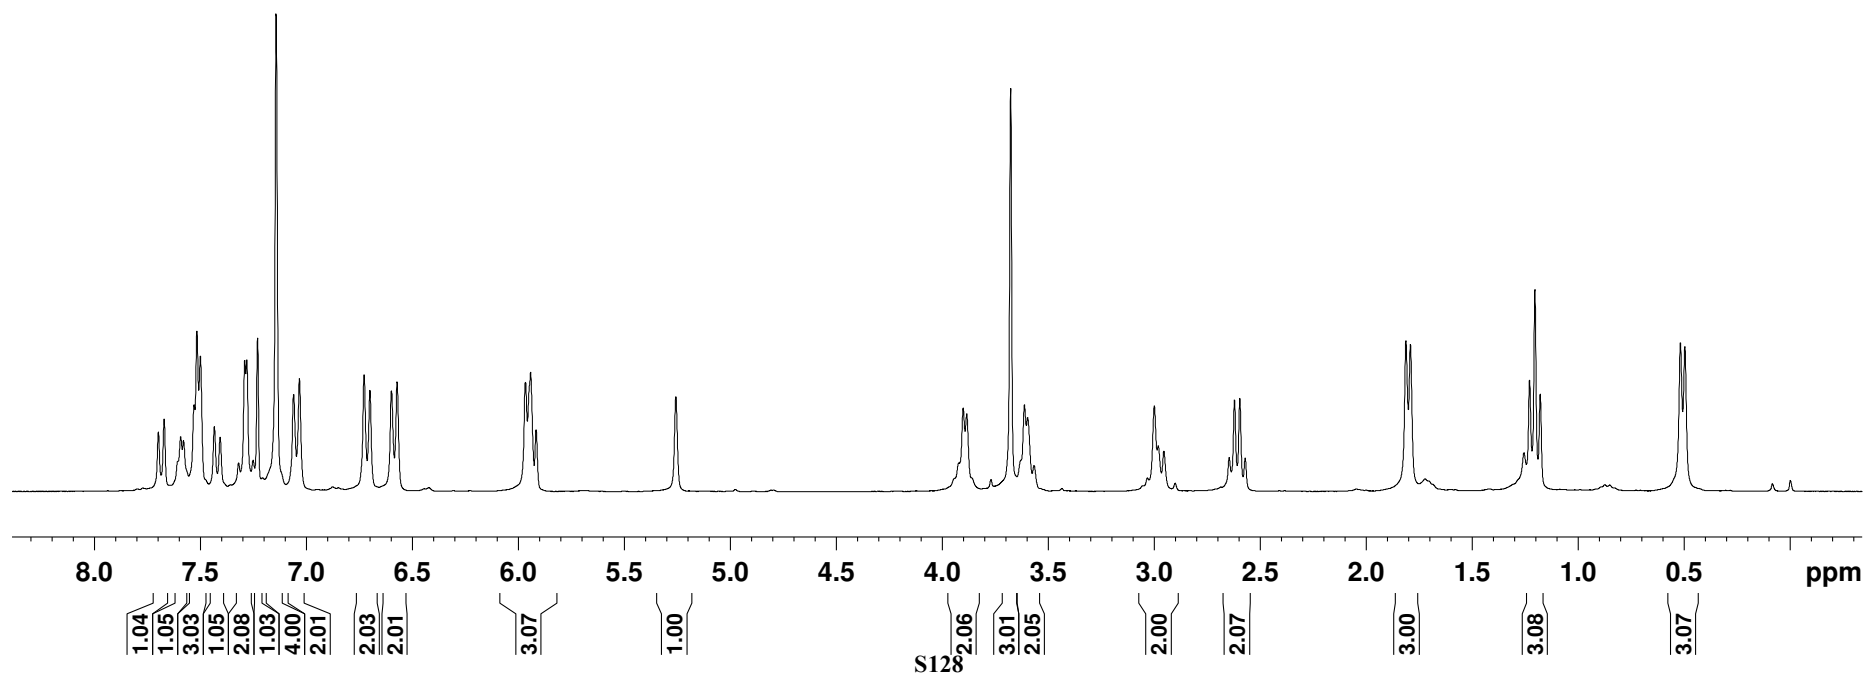

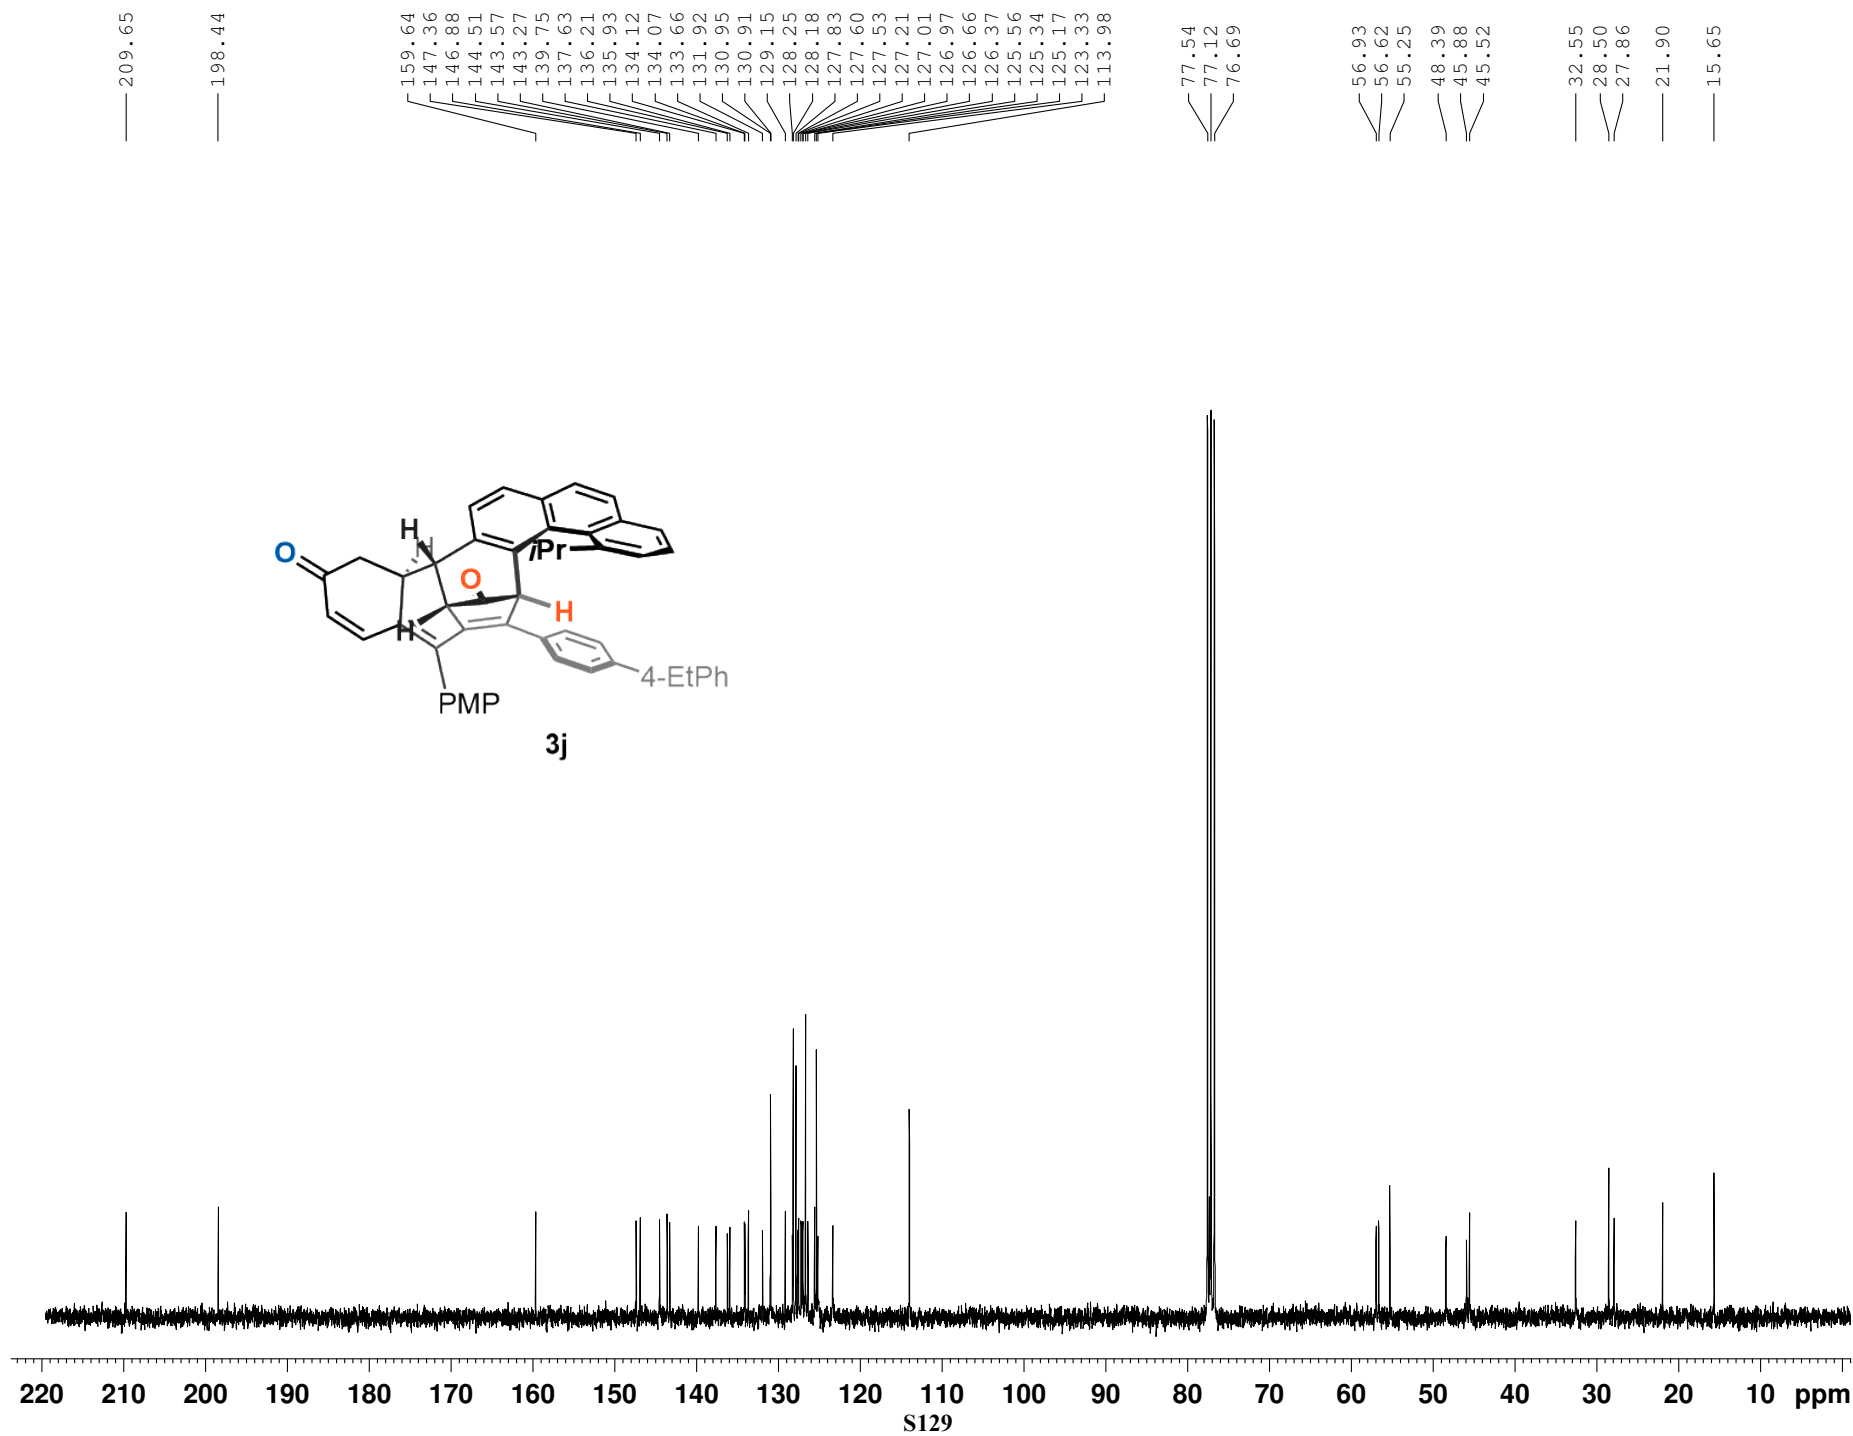

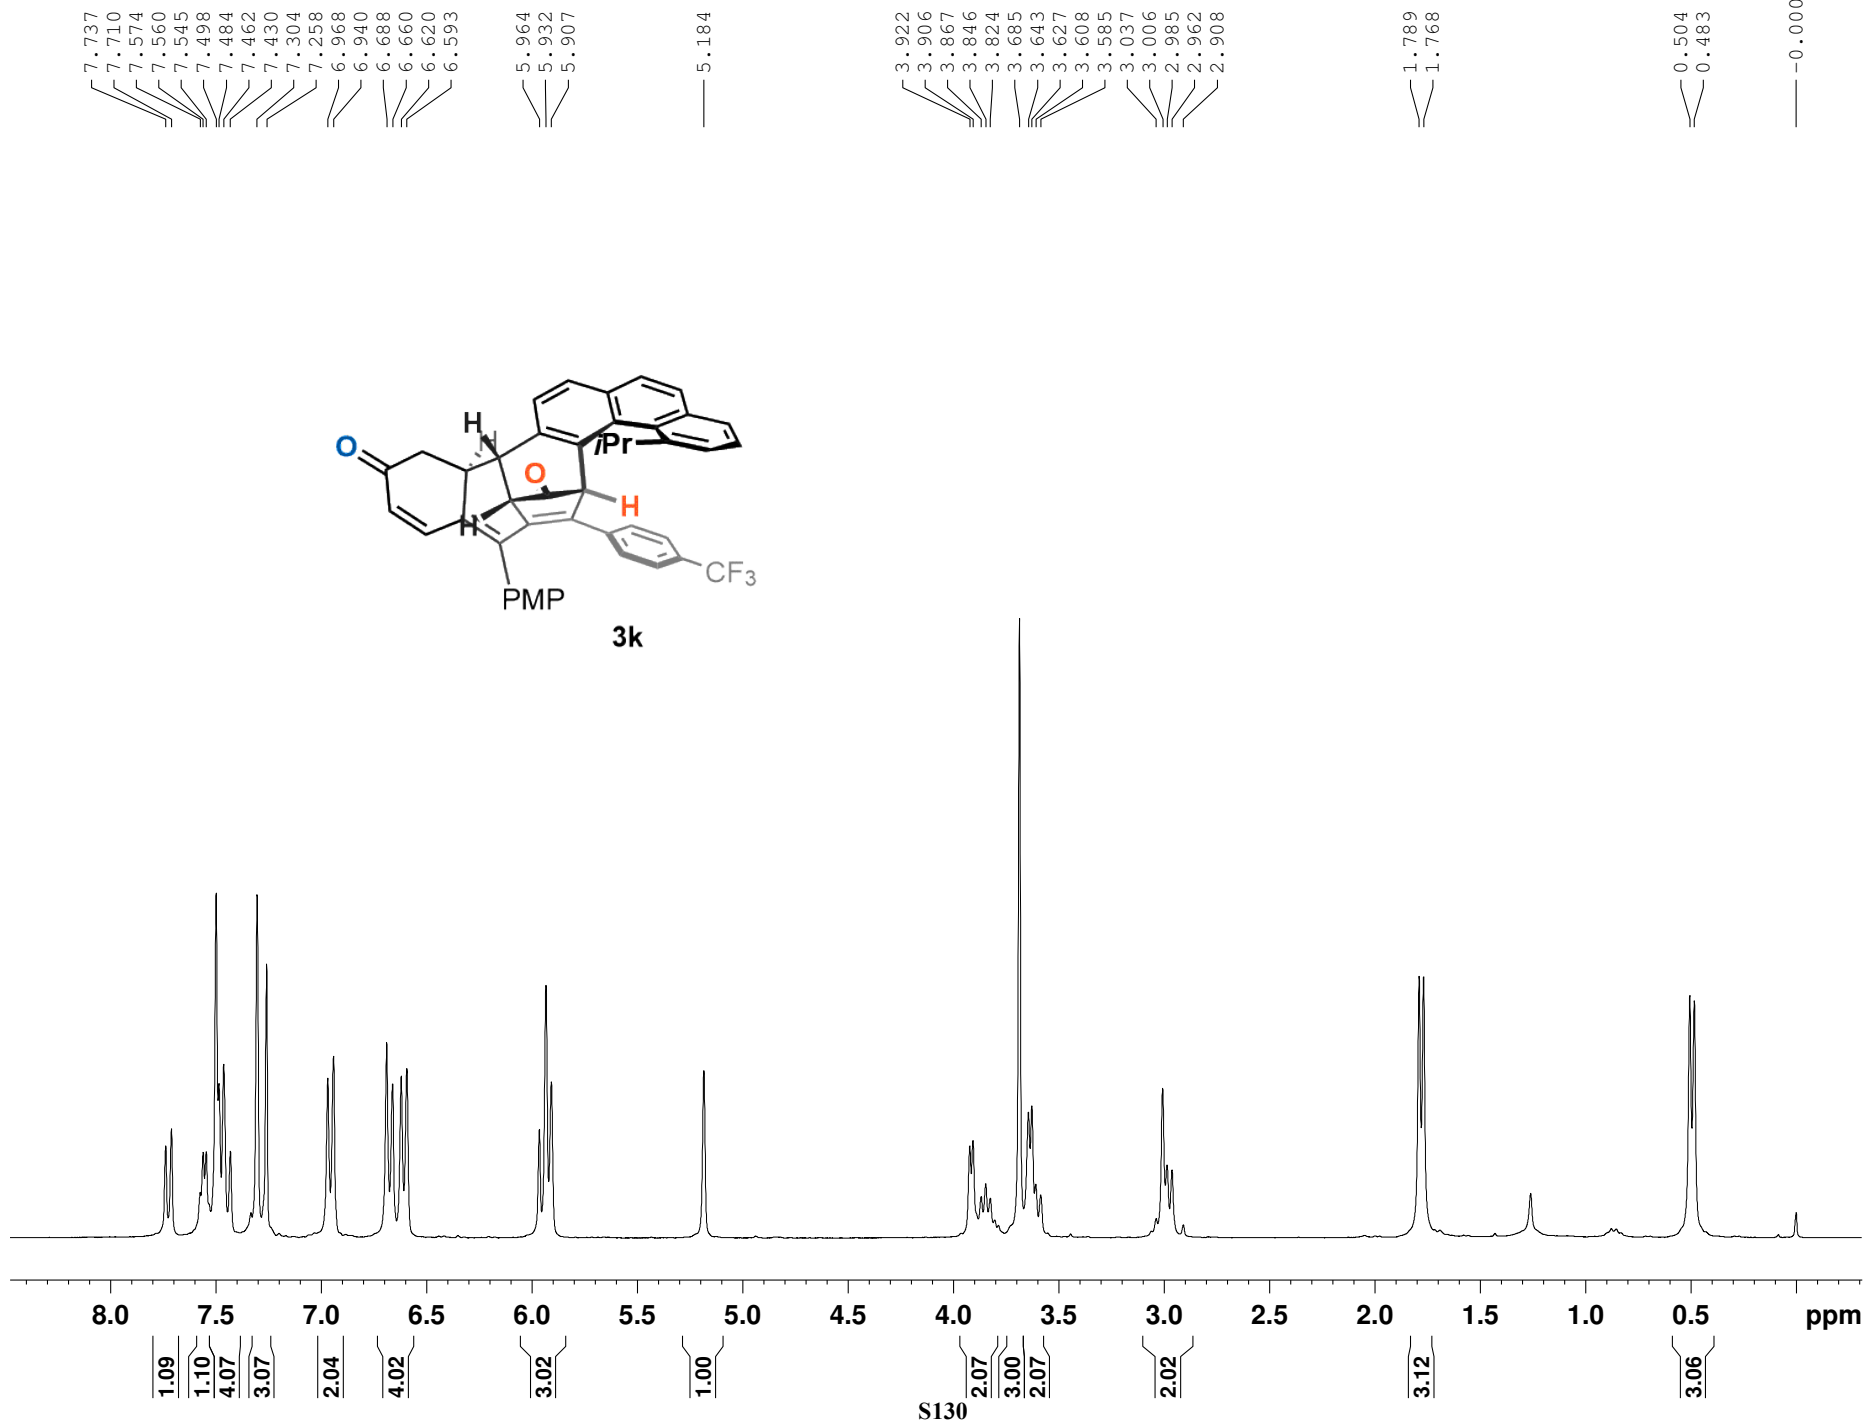

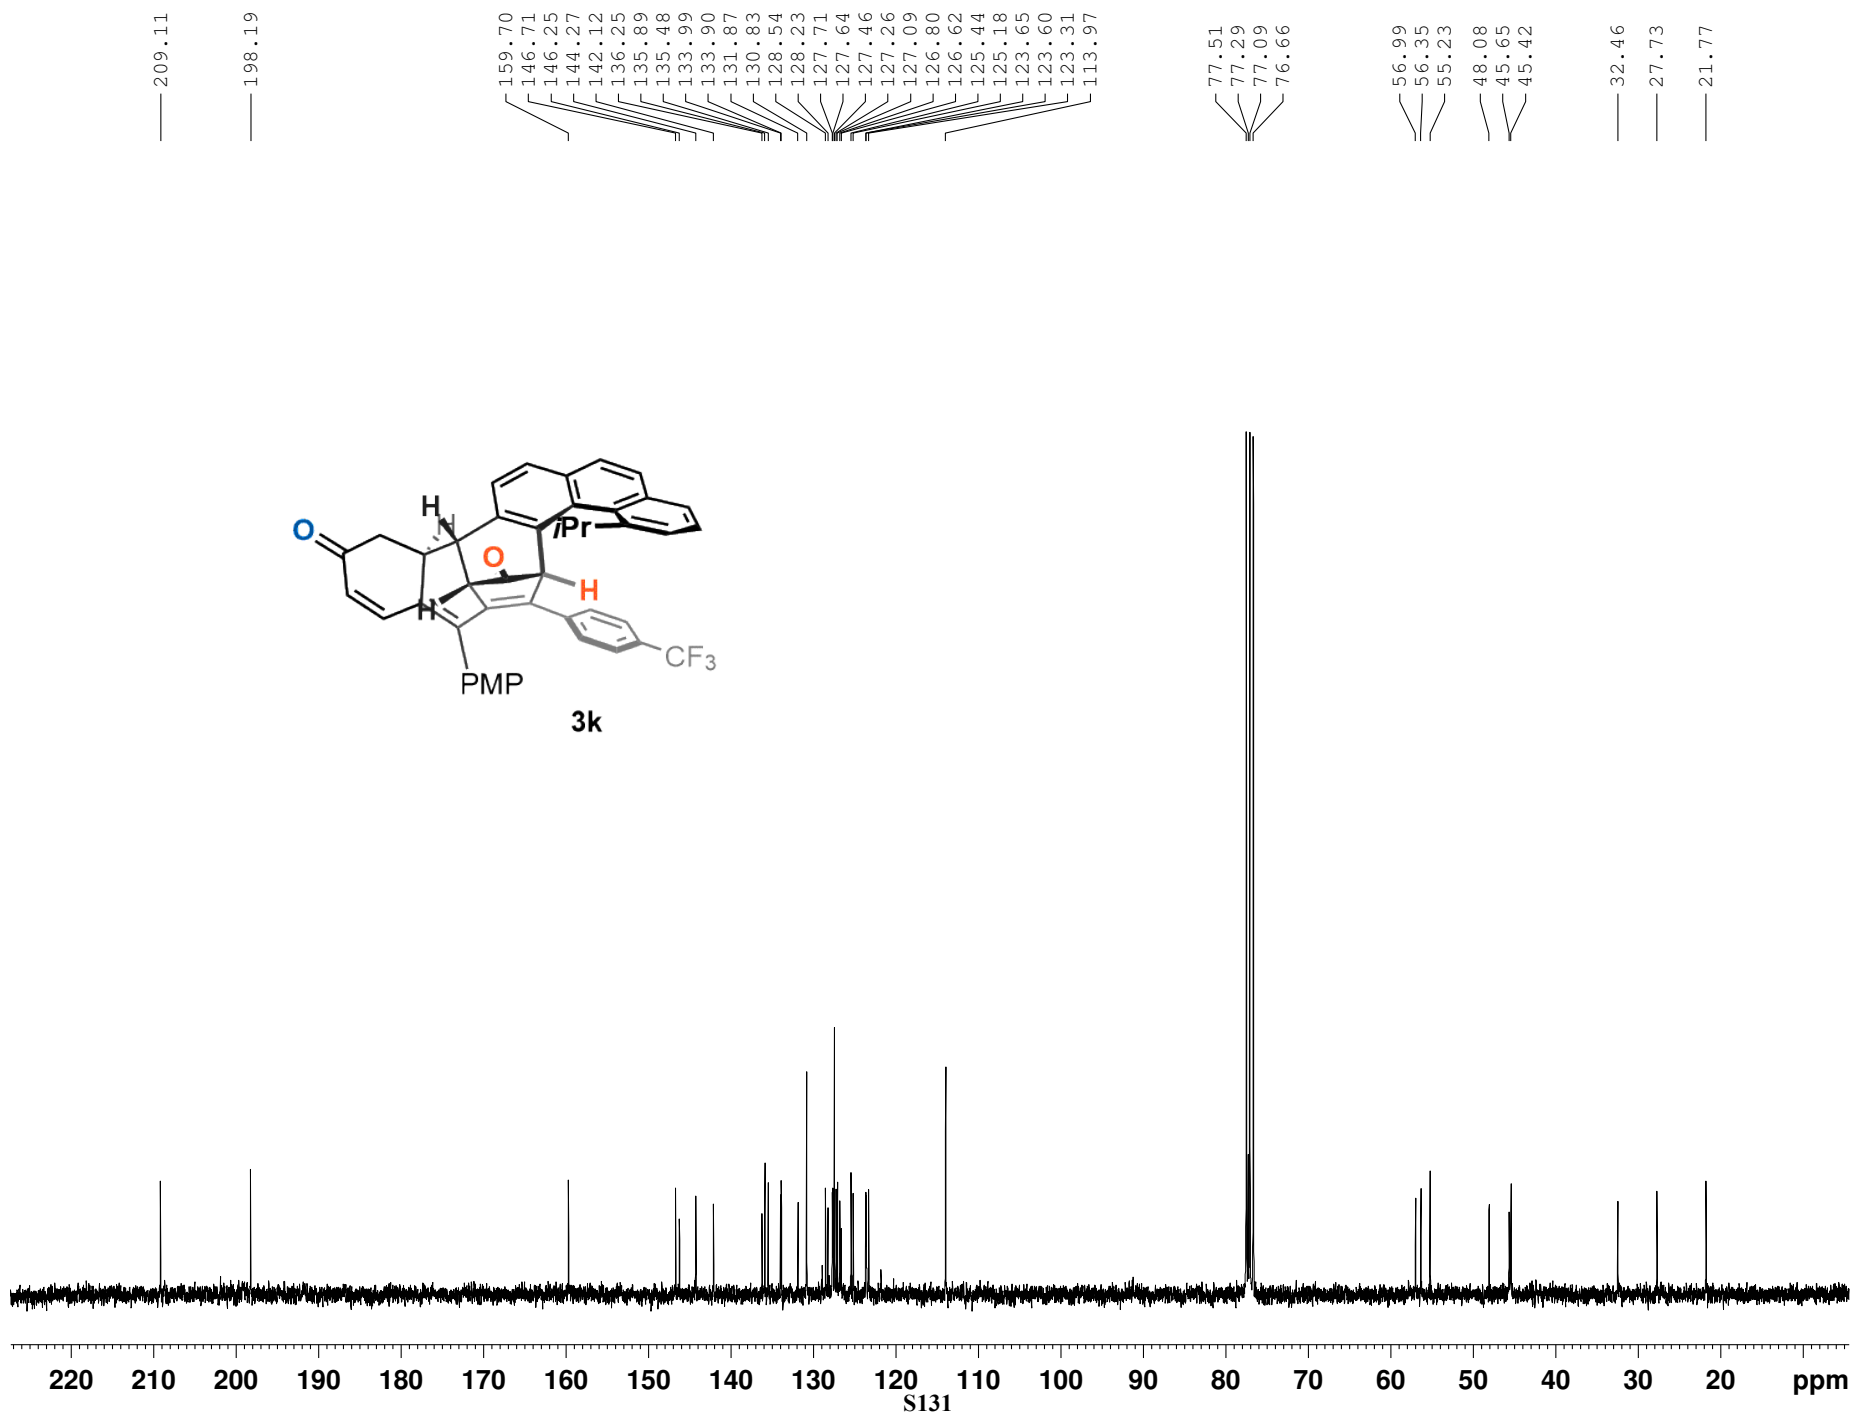

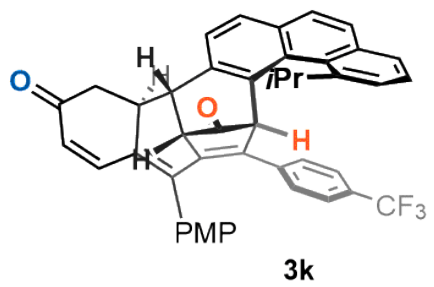

— -62.99

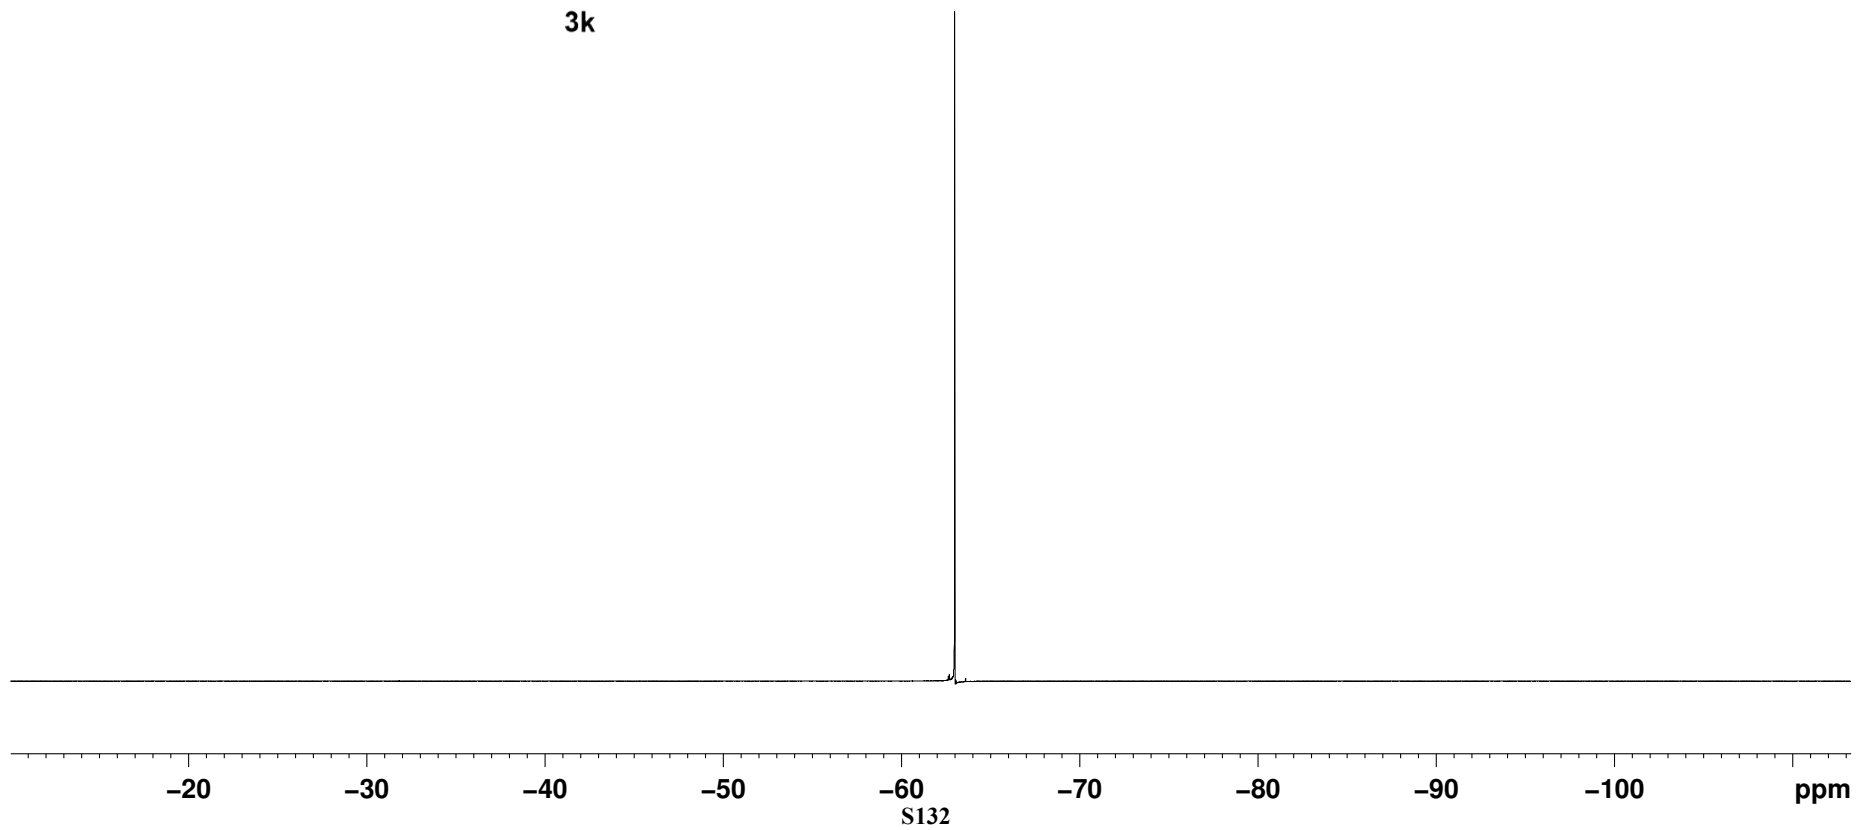

7.682  
7.655  
7.591  
7.577  
7.540  
7.525  
7.507  
7.417  
7.390  
7.329  
7.301  
7.281  
7.250  
7.060  
7.033  
6.734  
6.707

5.941  
5.907  
5.885

5.206

3.882  
3.865  
3.703  
3.573  
3.559  
3.460

2.990  
2.968  
2.946

1.803  
1.782

0.509  
0.487

-0.002

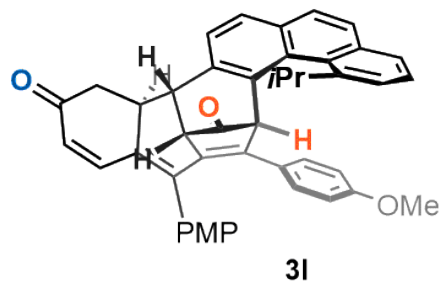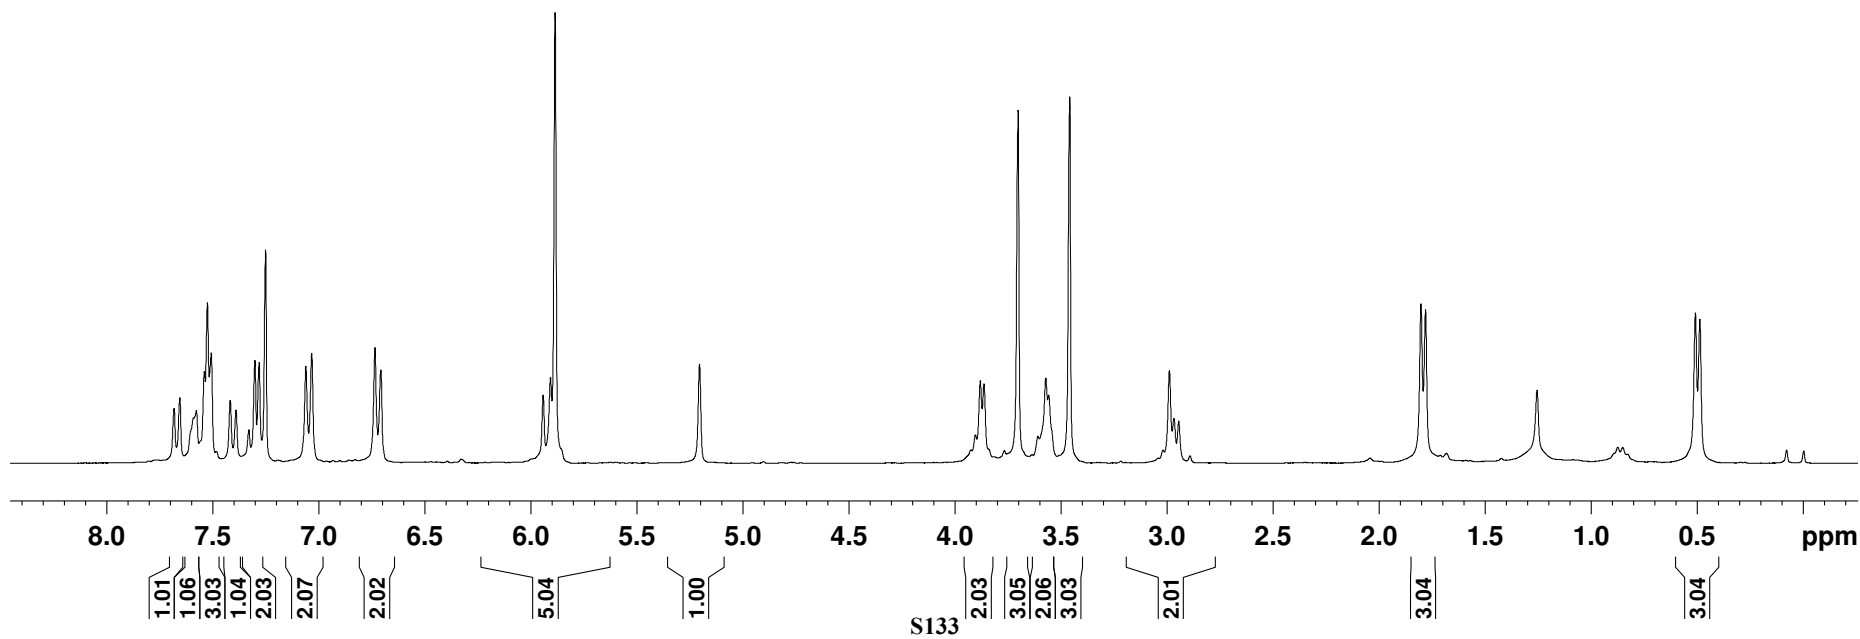

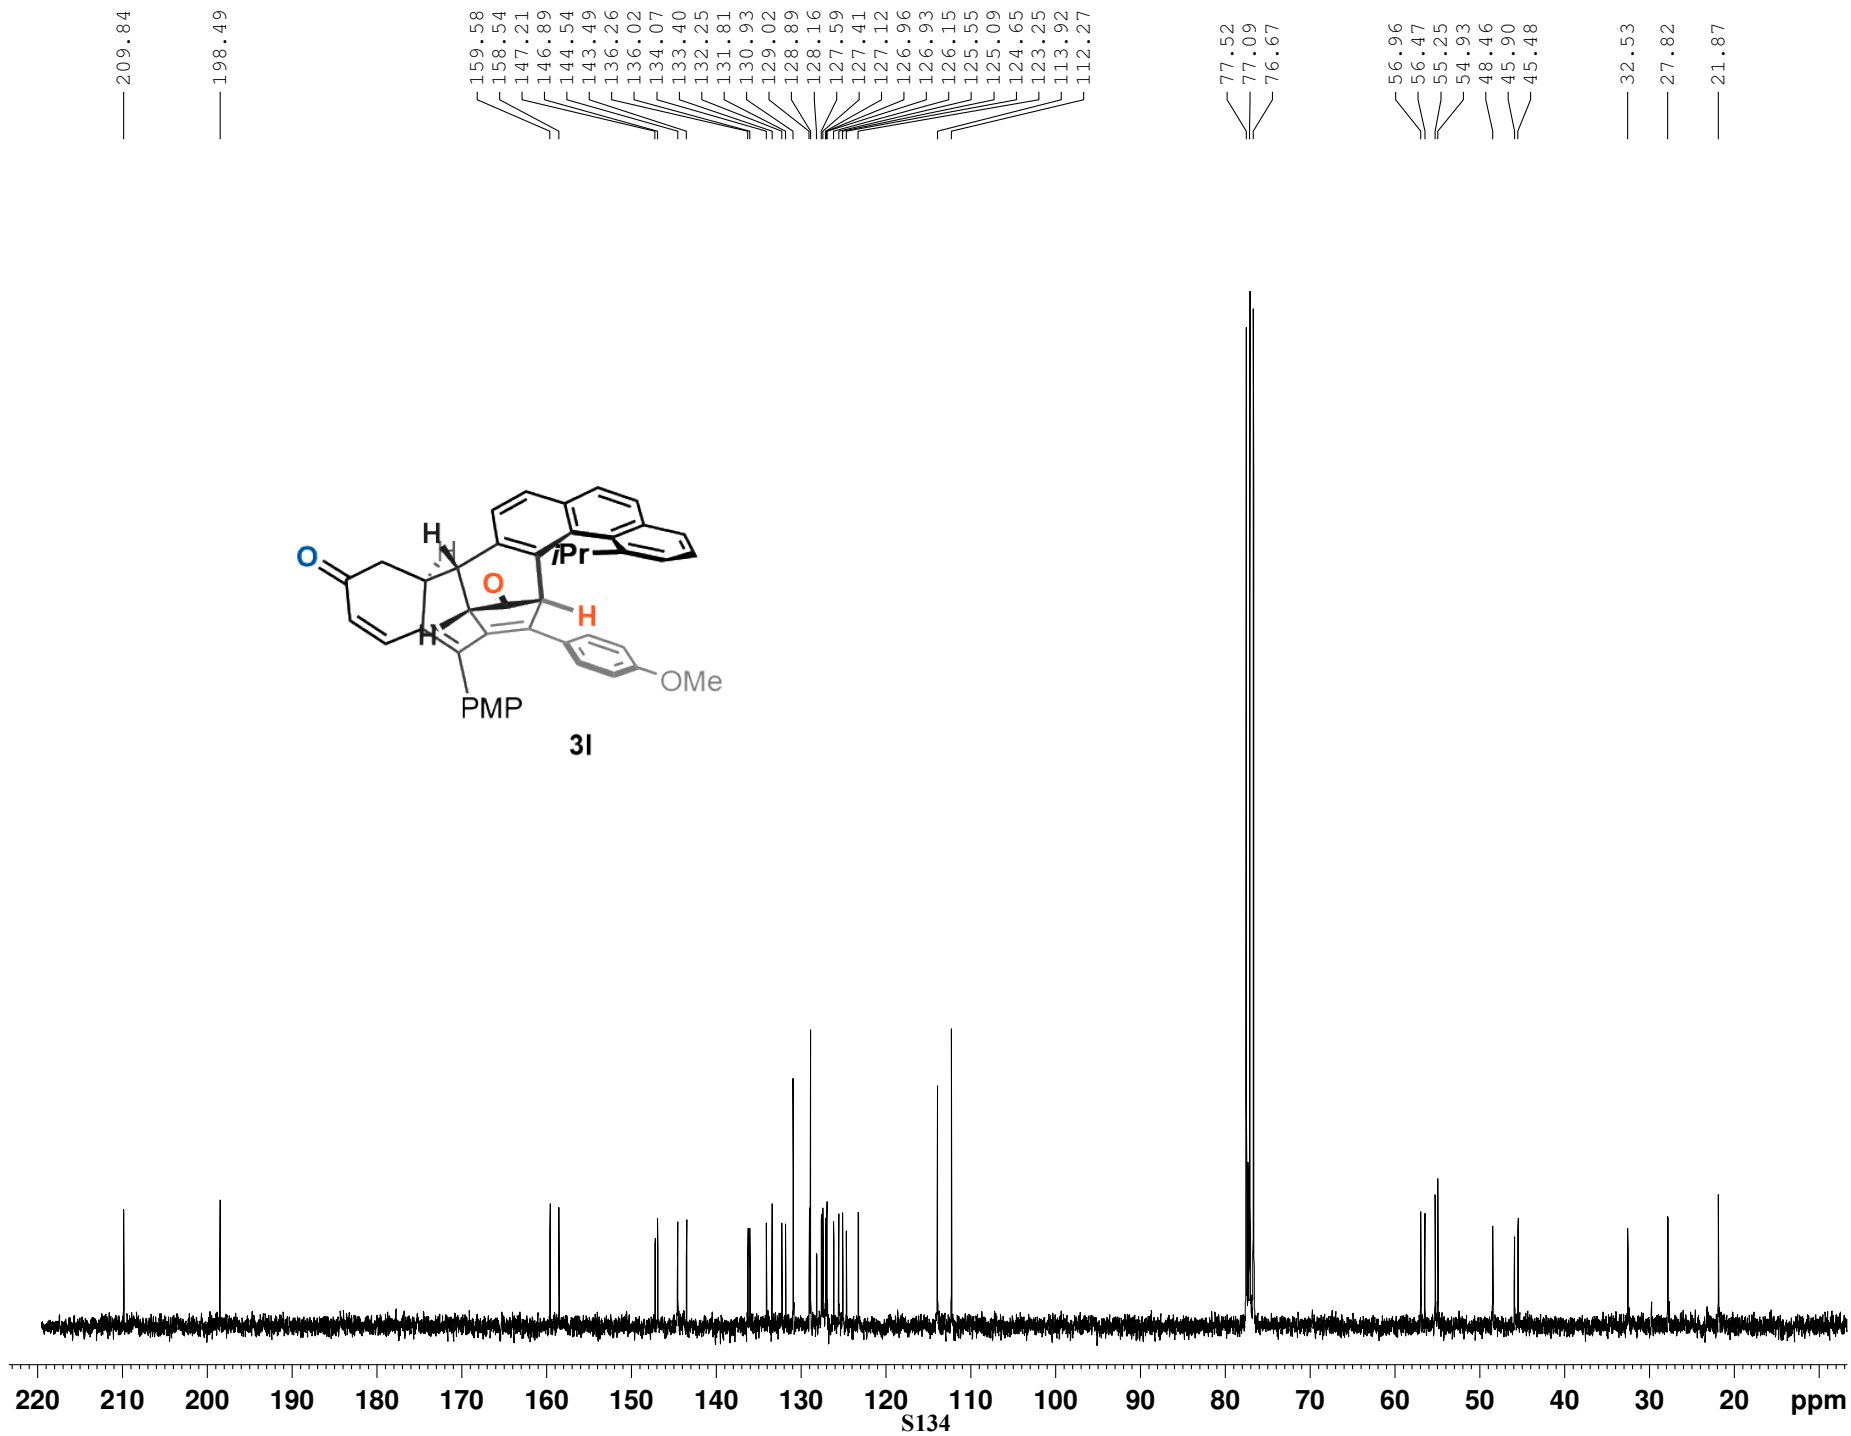

7.710  
7.683  
7.554  
7.521  
7.500  
7.490  
7.439  
7.411  
7.330  
7.301  
7.292  
7.255  
7.003  
6.975  
6.698  
6.671  
6.095  
6.067  
6.038  
5.953  
5.919  
5.886  
5.868  
5.841

— 5.179

3.898  
3.882  
3.860  
3.838  
3.690  
3.636  
3.601  
3.588

2.996  
2.974  
2.952

1.797  
1.775

— 1.259

0.502  
0.481

— 0.000

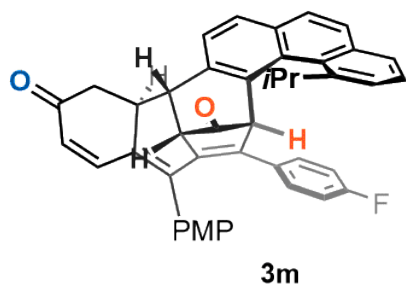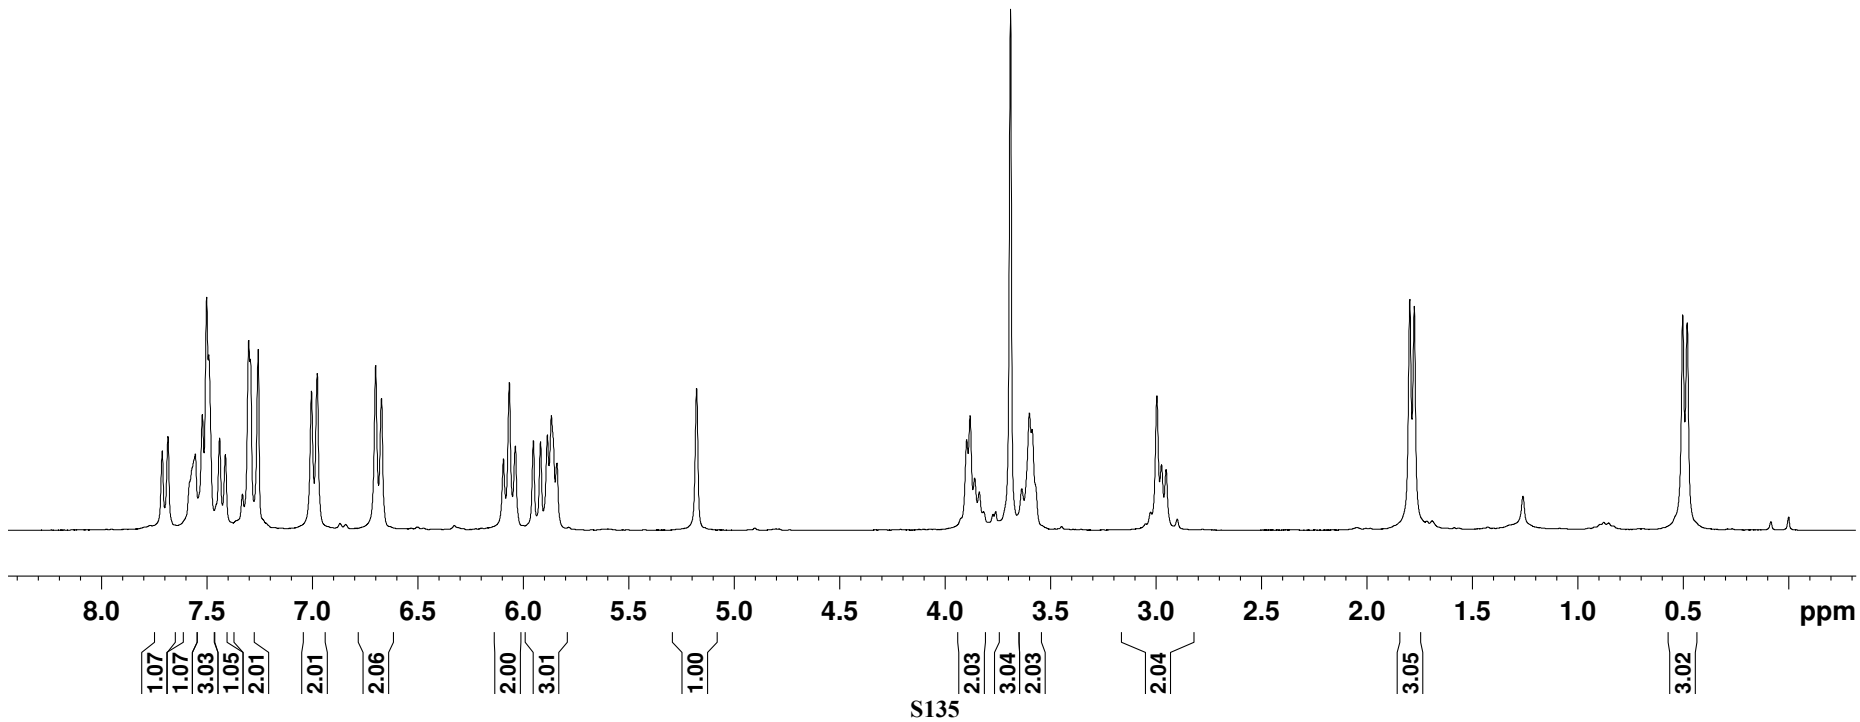



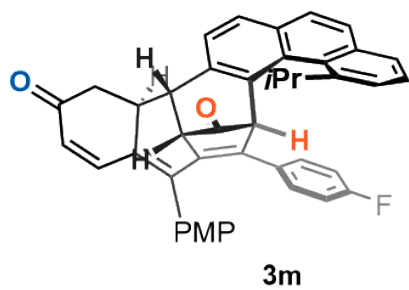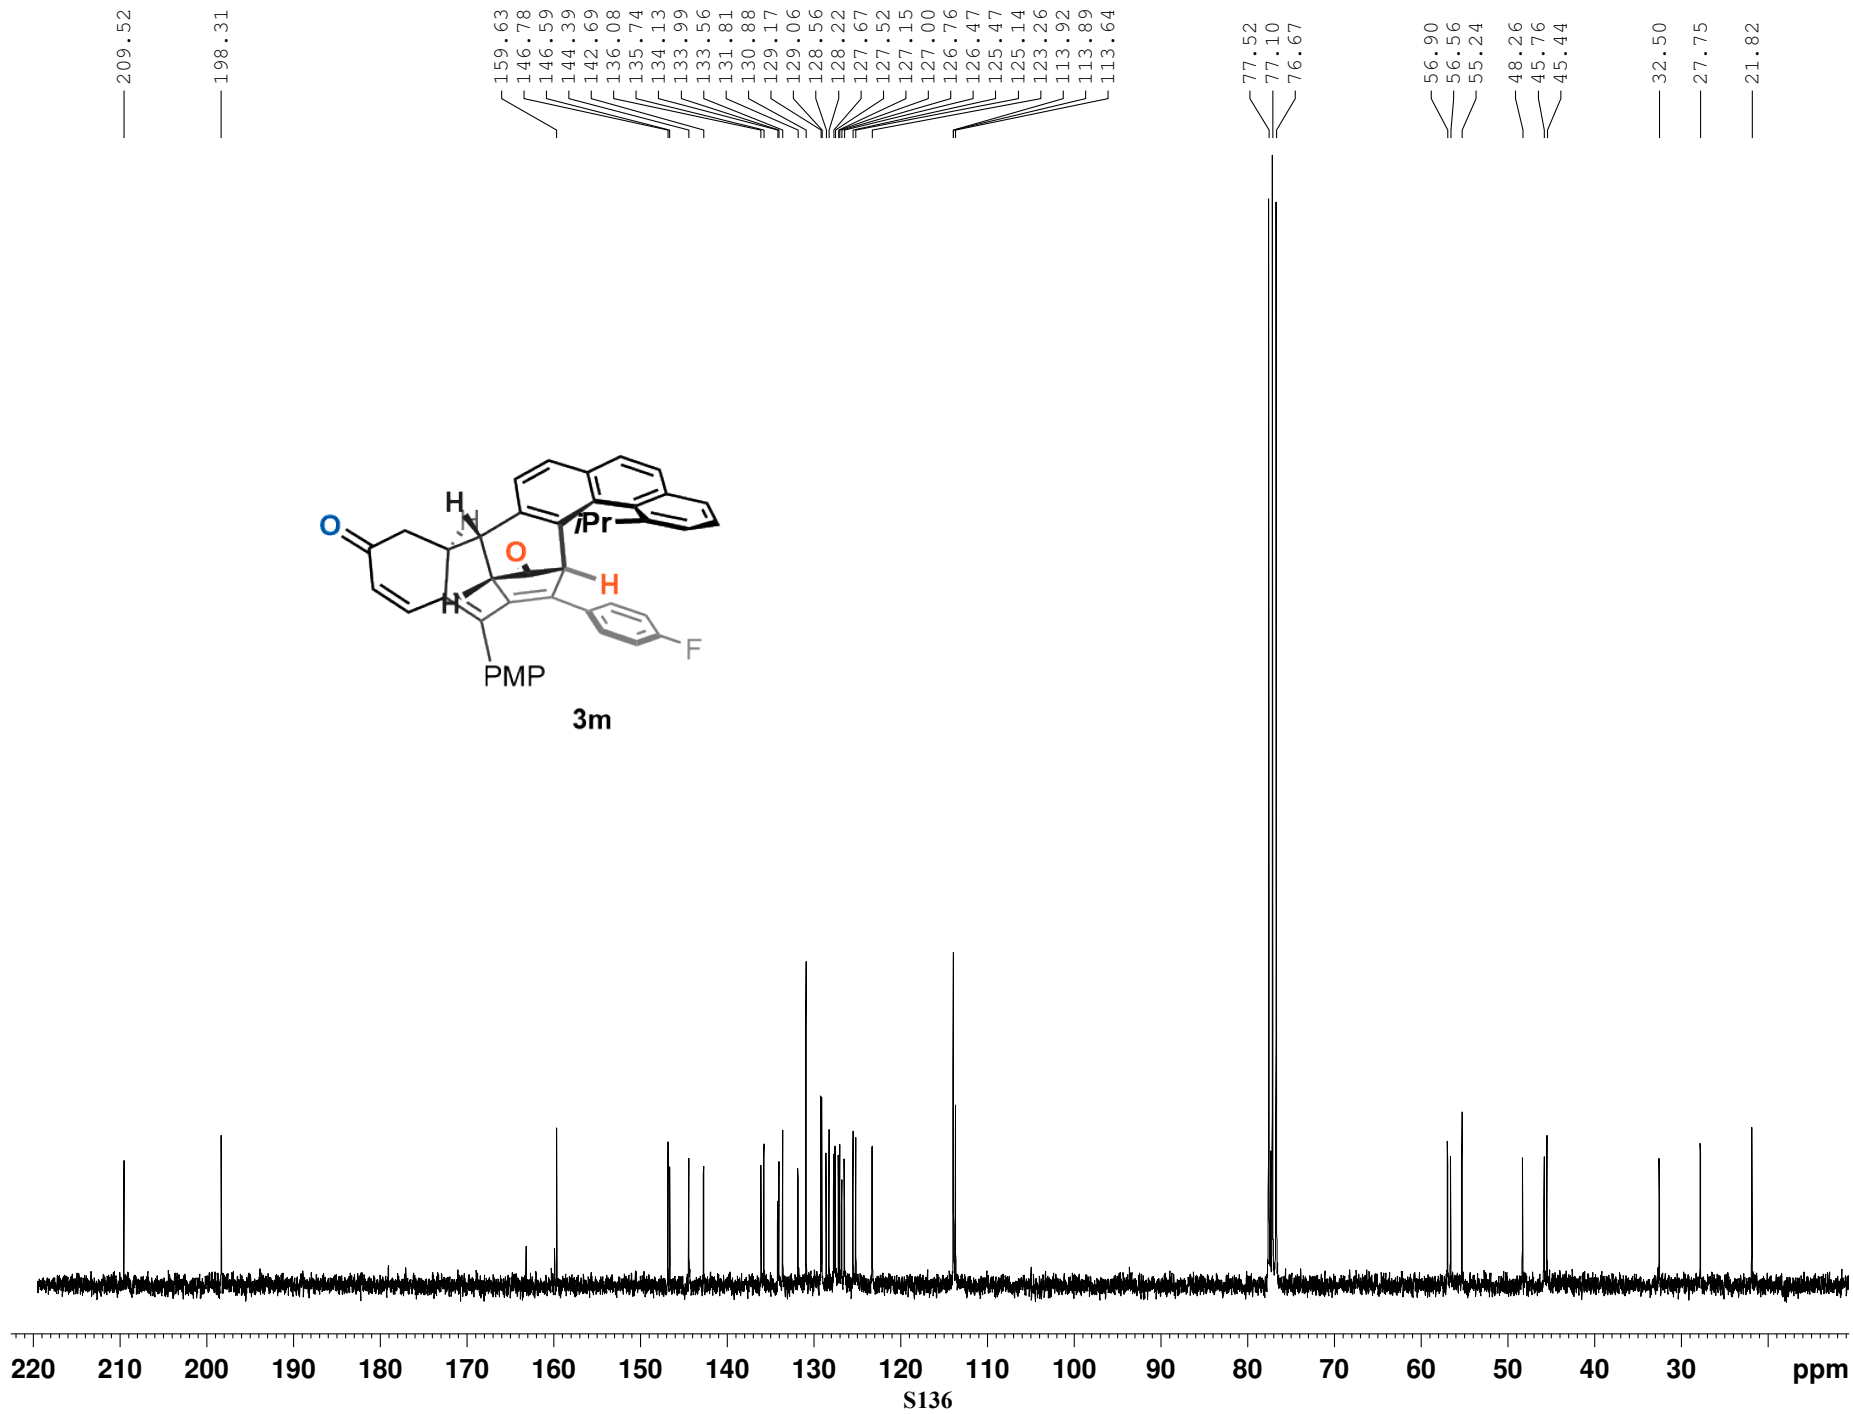

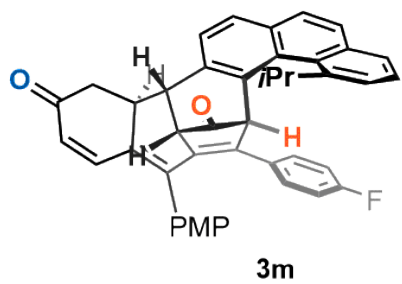

— -113.40

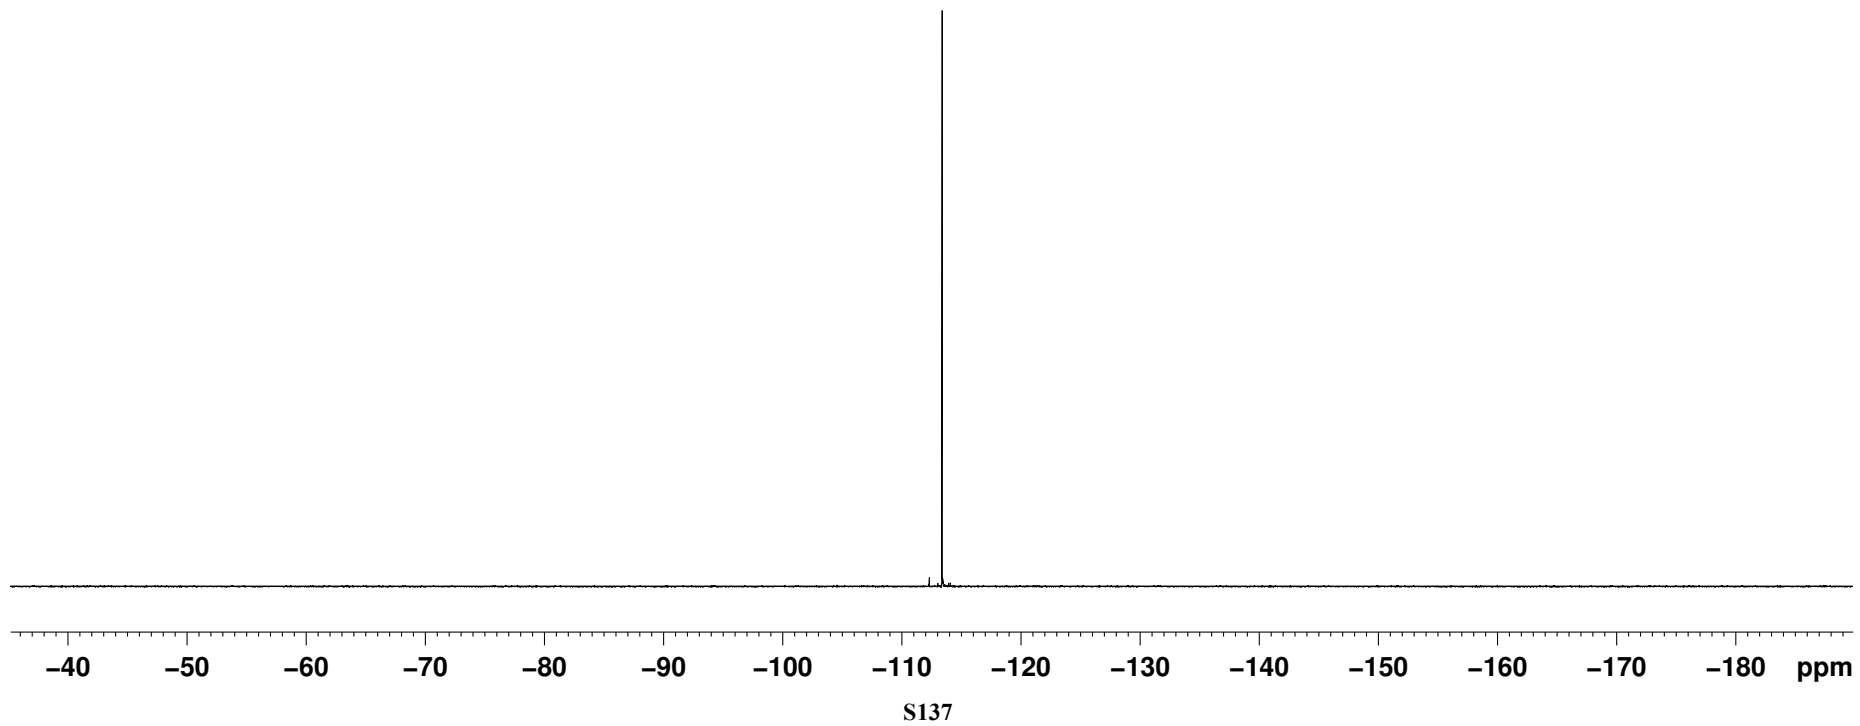

7.715  
7.688  
7.583  
7.559  
7.525  
7.499  
7.478  
7.436  
7.409  
7.357  
7.329  
7.306  
7.277  
7.256  
7.004  
6.977  
6.719  
6.692  
6.349  
6.322  
5.954  
5.920  
5.812  
5.785

5.170

3.898  
3.881  
3.855  
3.708  
3.603  
3.587

2.995  
2.976  
2.949

1.789  
1.768

0.504  
0.483

-0.000

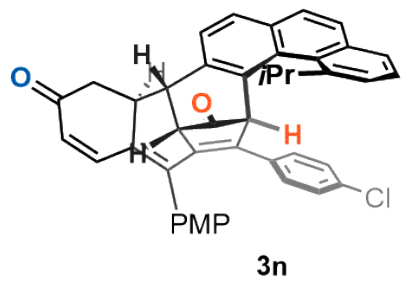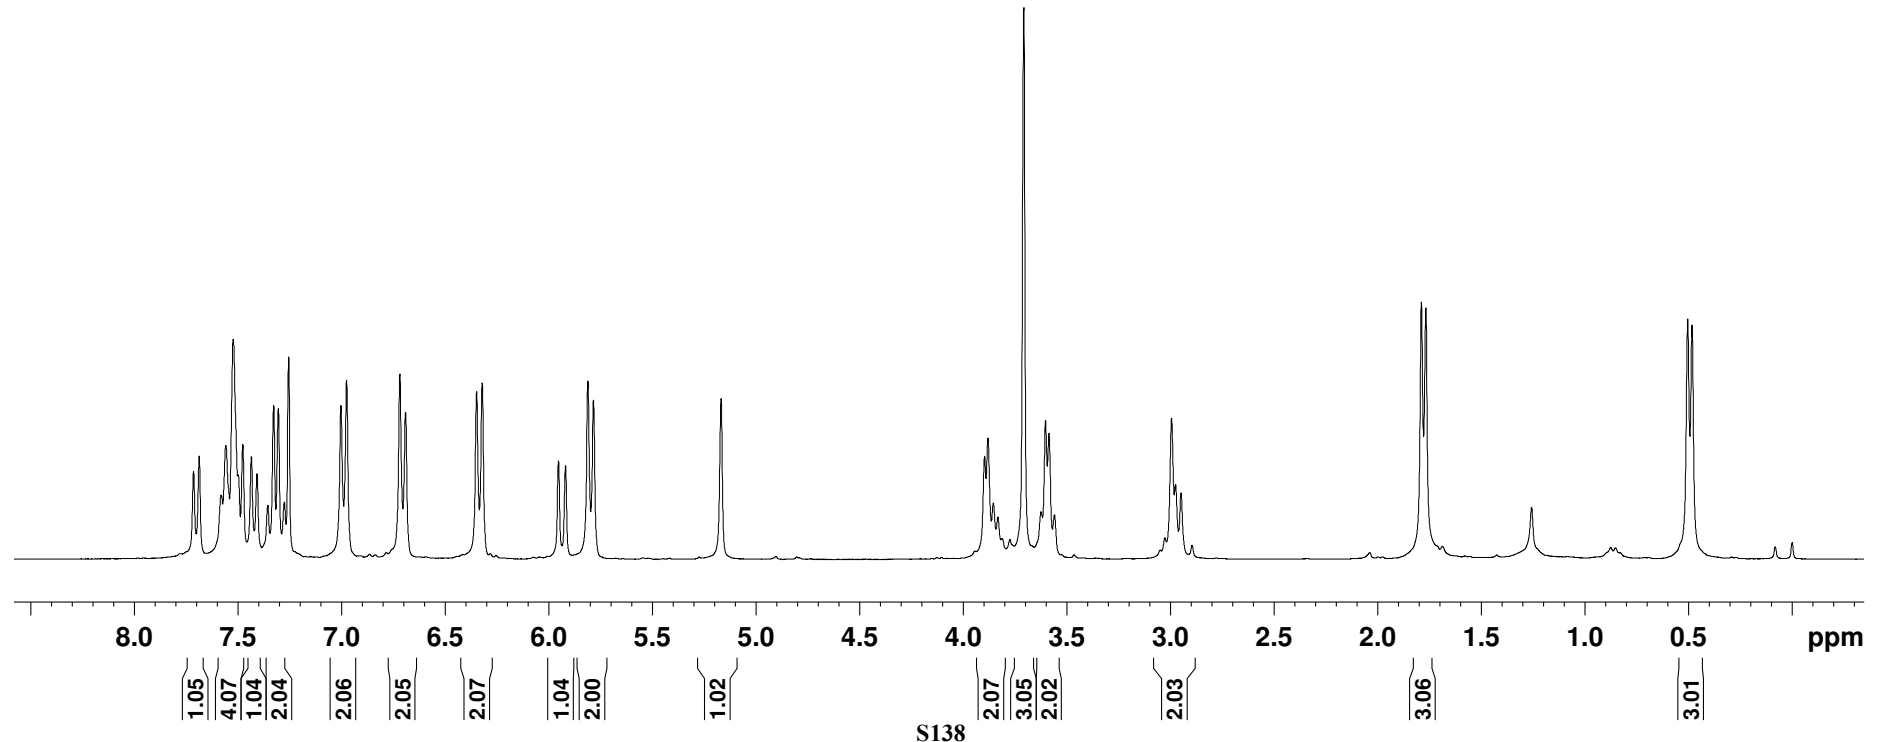

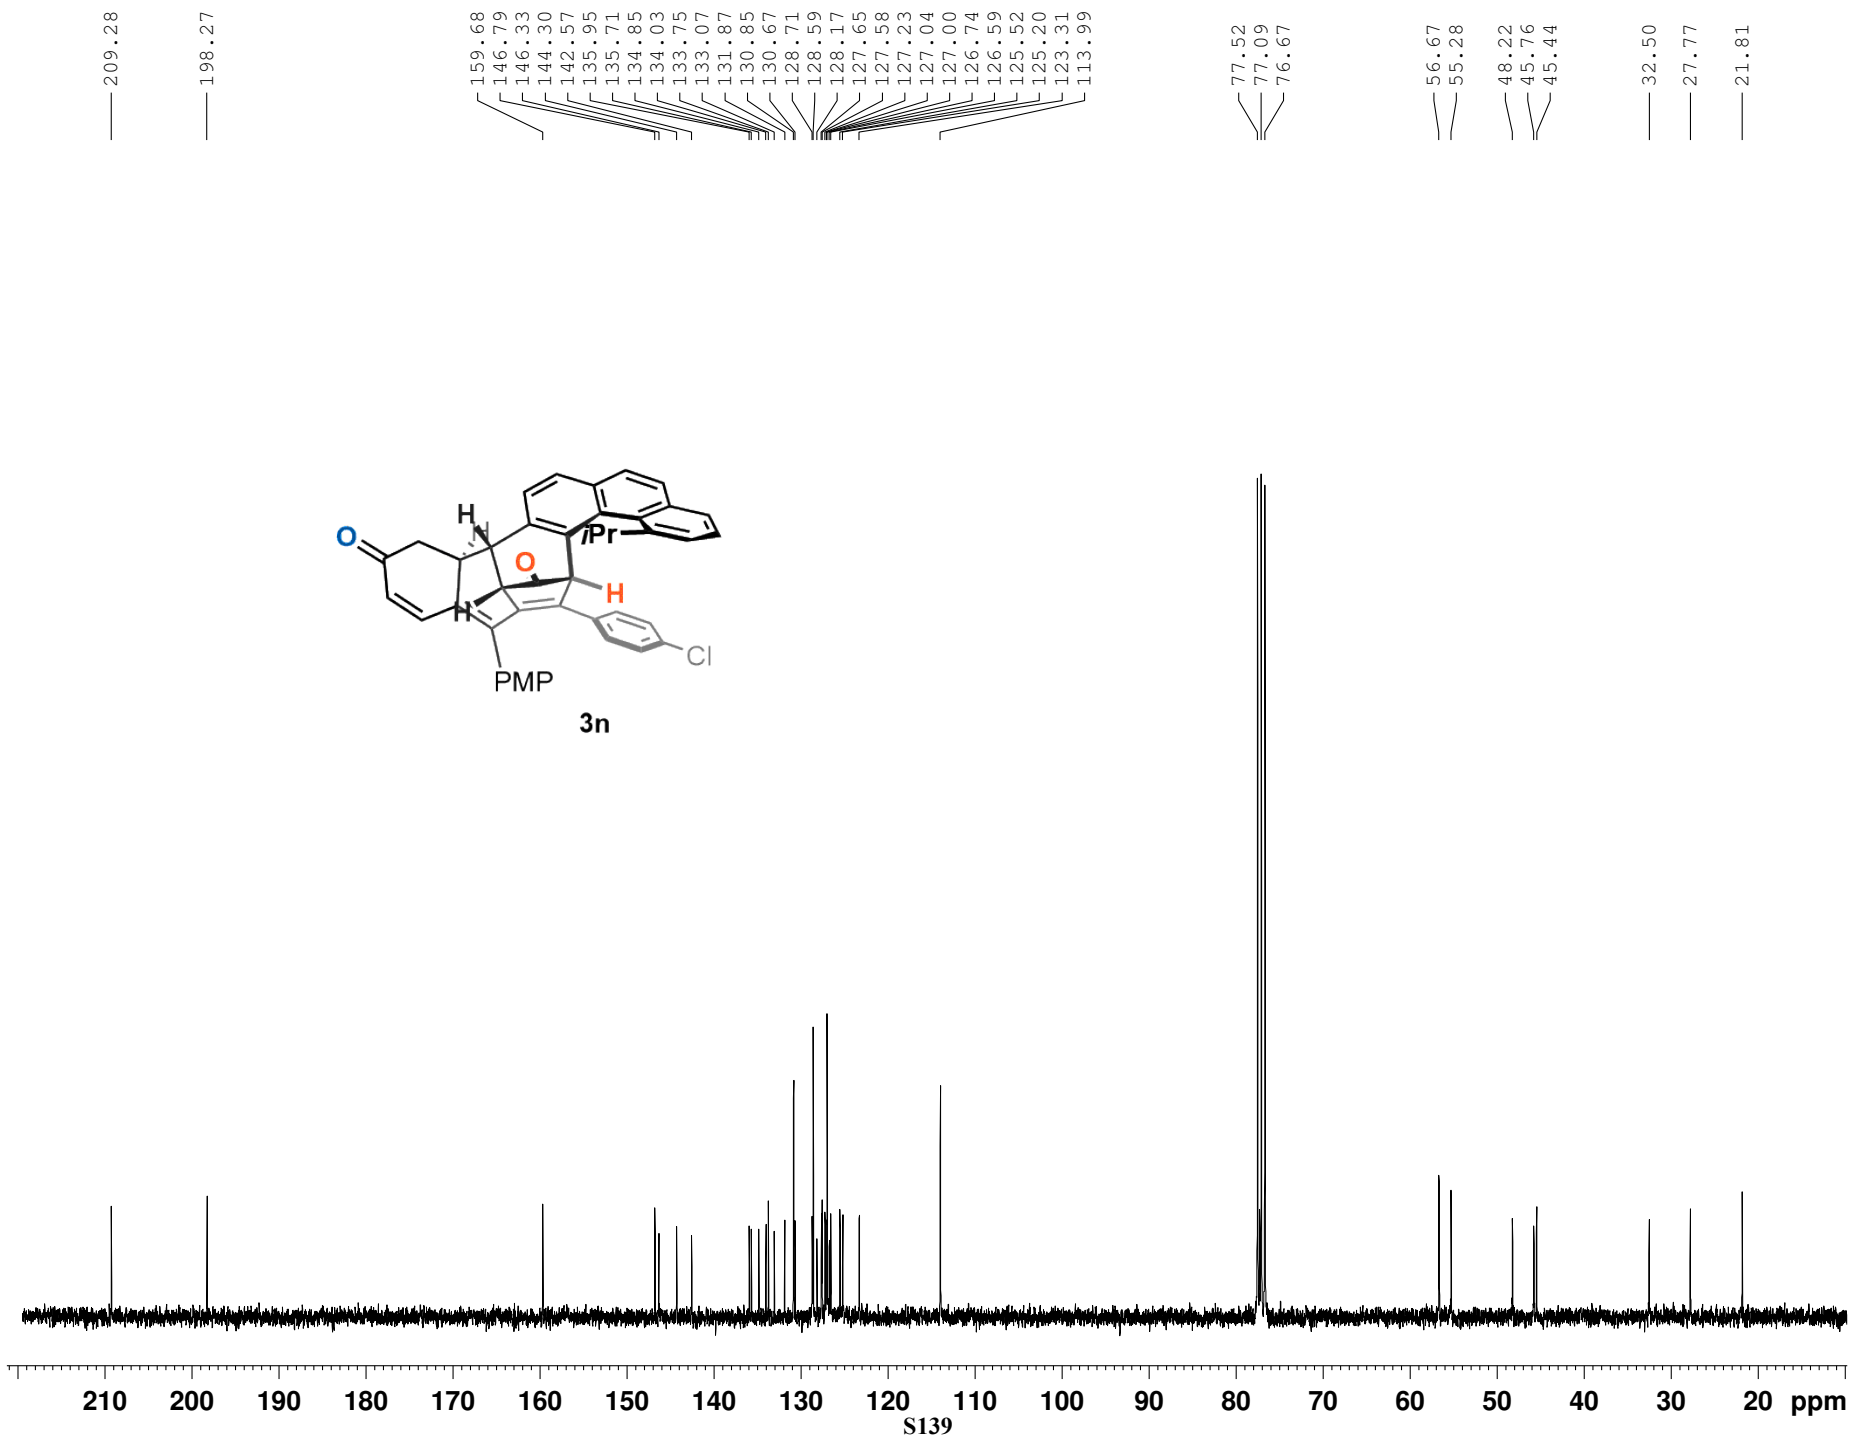

7.714  
7.687  
7.582  
7.557  
7.534  
7.526  
7.505  
7.473  
7.436  
7.408  
7.364  
7.335  
7.308  
7.280  
7.256  
7.000  
6.973  
6.722  
6.694  
6.498  
6.470  
5.953  
5.919  
5.738  
5.711  
5.162

3.895  
3.878  
3.852  
3.830  
3.710  
3.684  
3.621  
3.602  
3.585  
3.558  
2.995  
2.976  
2.948

1.786  
1.765

0.503  
0.482

-0.000

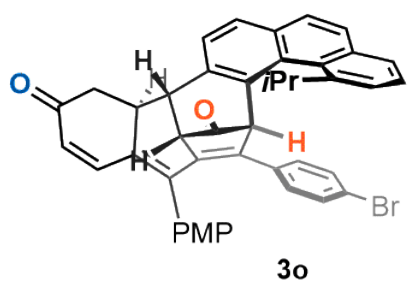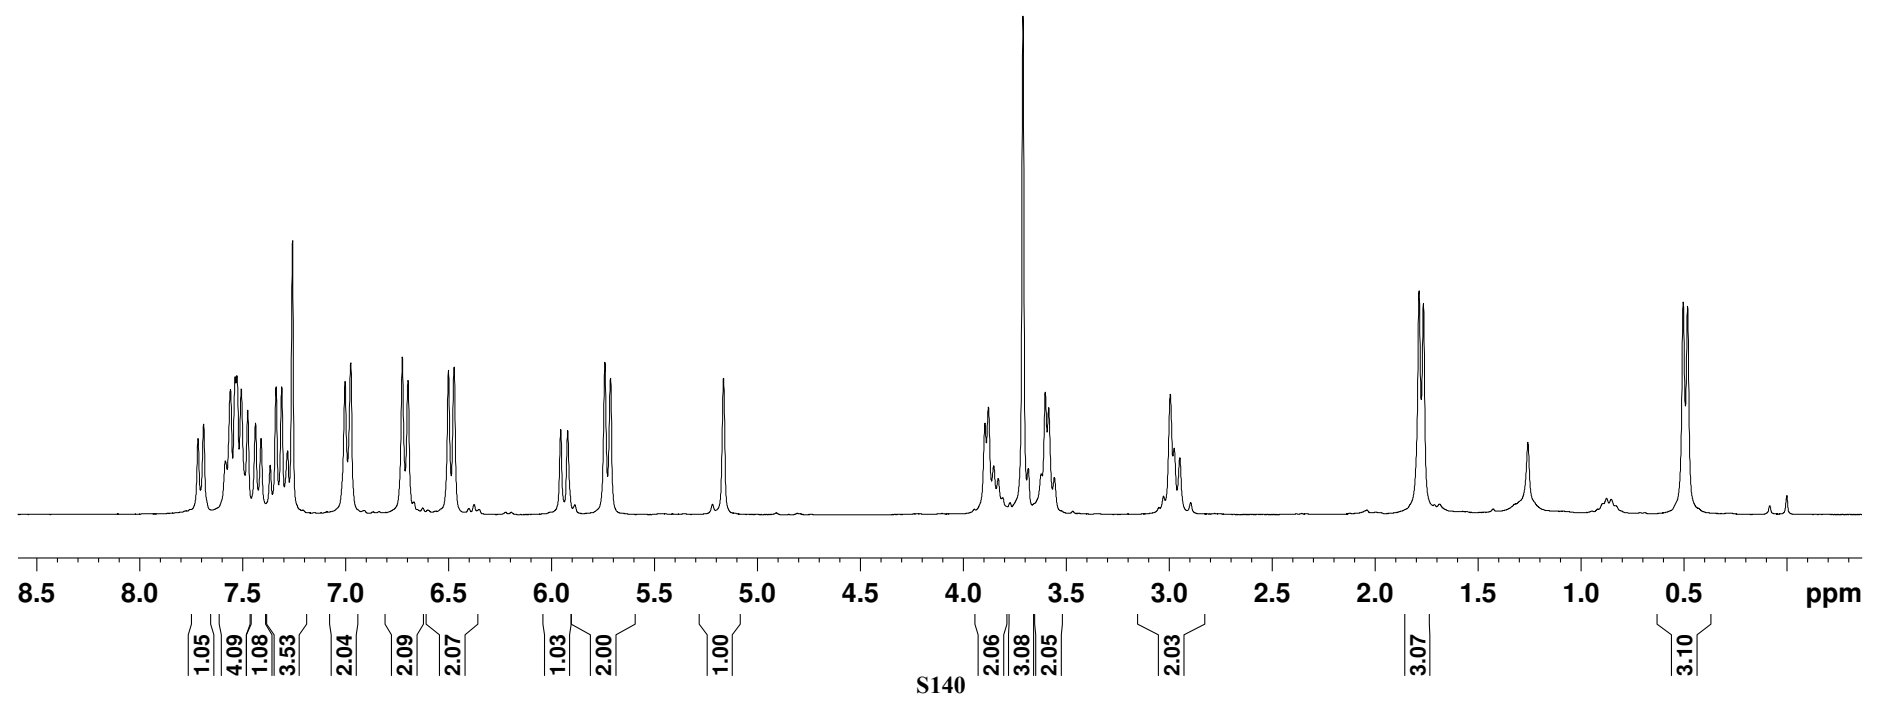

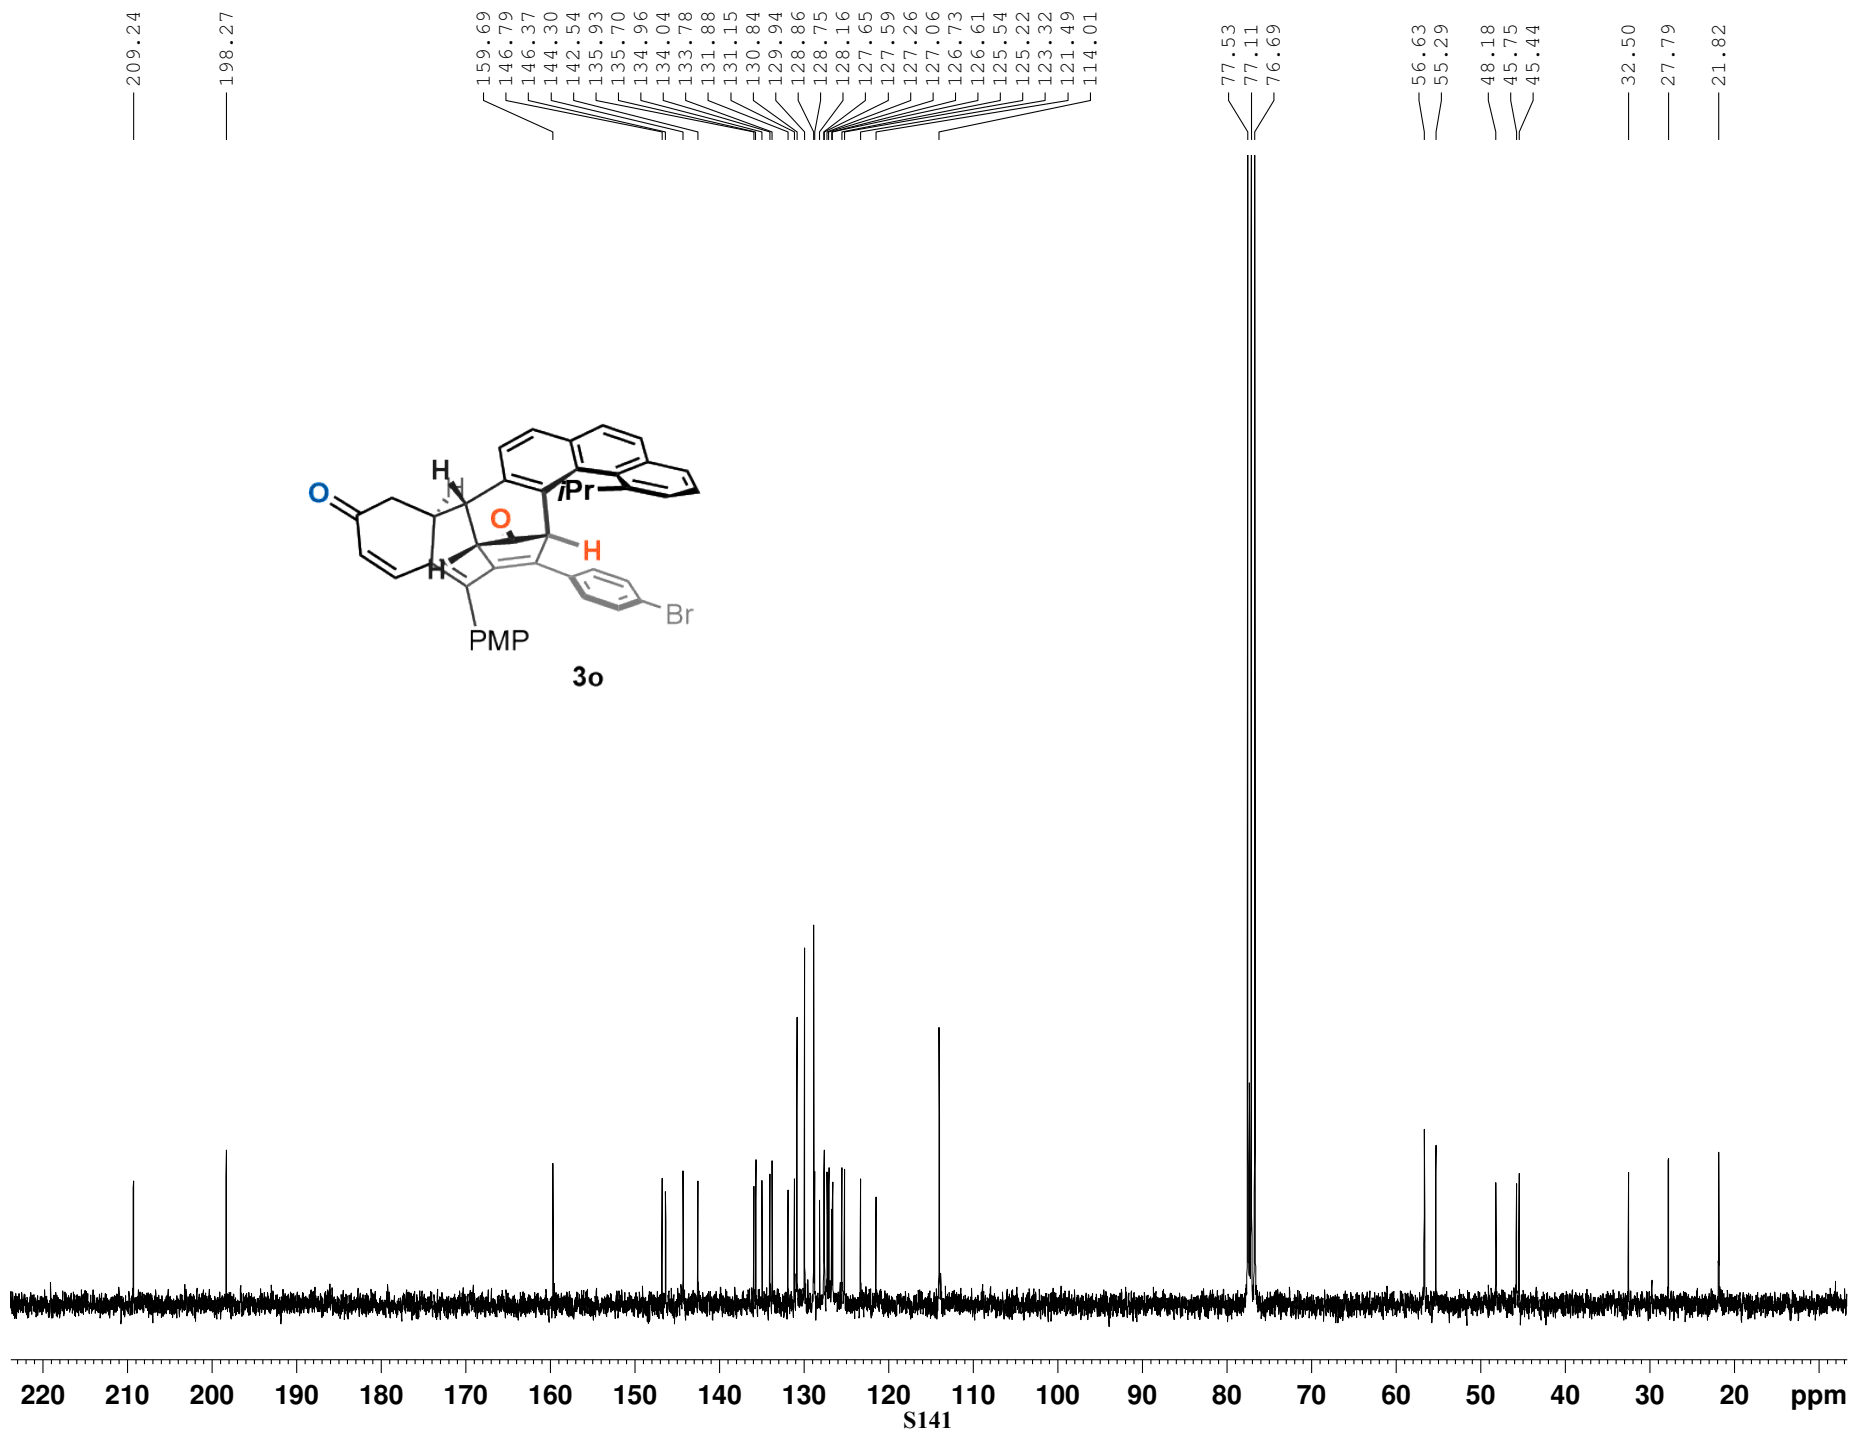

7.722  
7.694  
7.535  
7.501  
7.478  
7.445  
7.417  
7.401  
7.375  
7.351  
7.299  
7.261  
7.239  
7.210  
7.164  
7.136  
6.926  
6.898  
6.575  
6.535  
6.507  
6.165  
6.138  
6.111  
5.953  
5.919  
5.605  
5.580  
5.556  
5.204

3.905  
3.890  
3.834  
3.815  
3.794  
3.772  
3.752  
3.713  
3.679  
3.648  
3.610  
3.591  
2.989  
2.956

1.796  
1.775

0.478  
0.457

-0.000

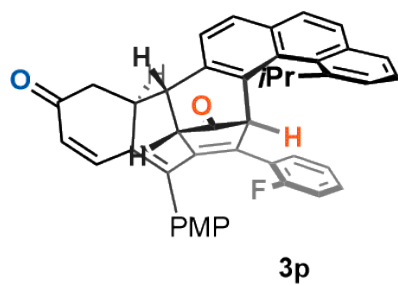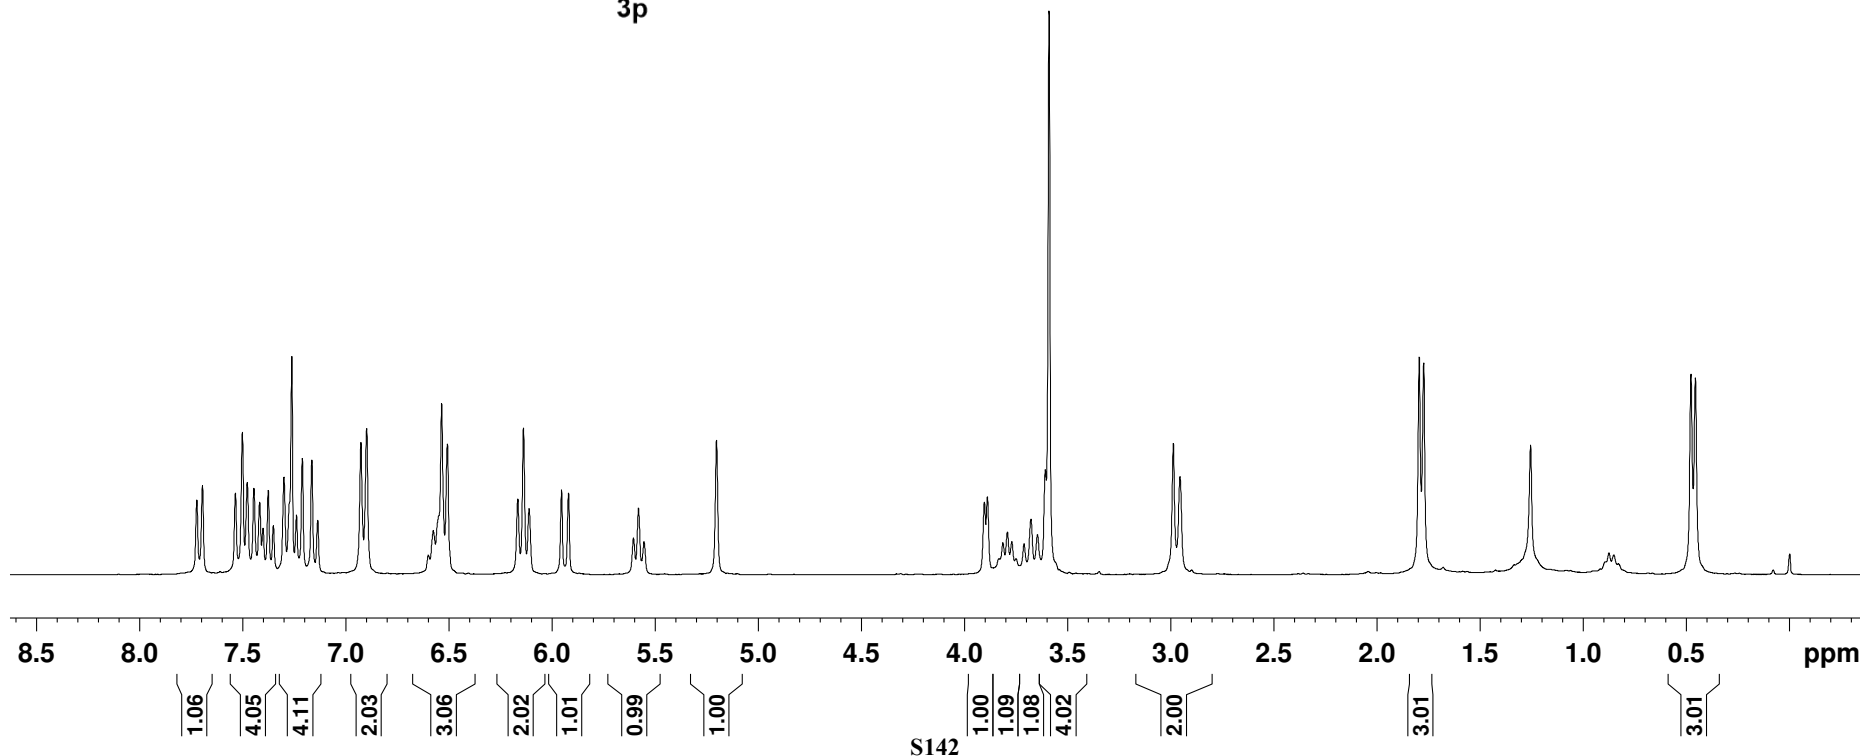

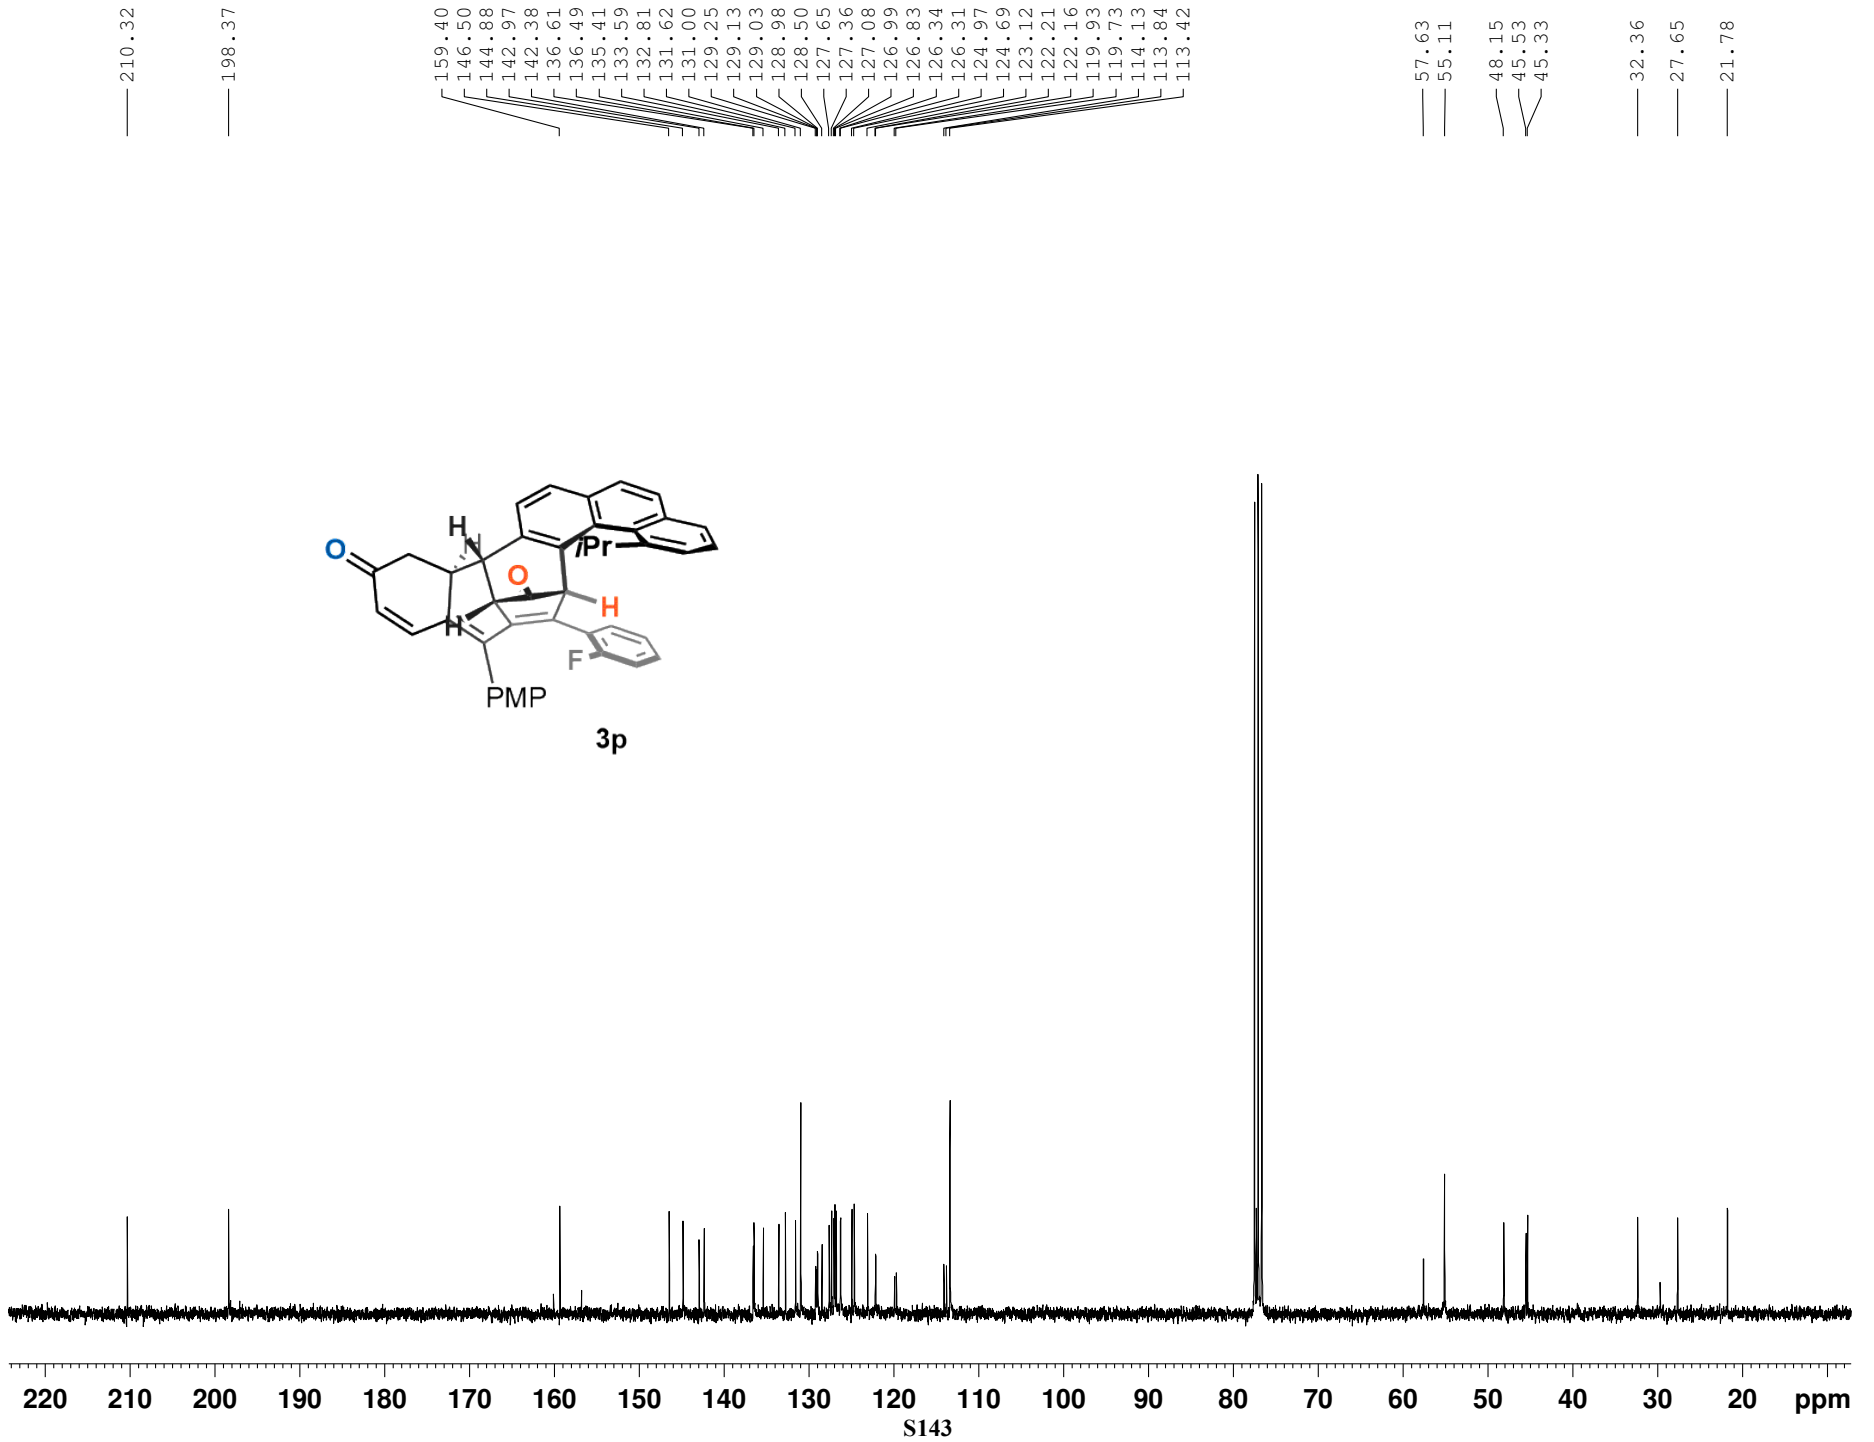



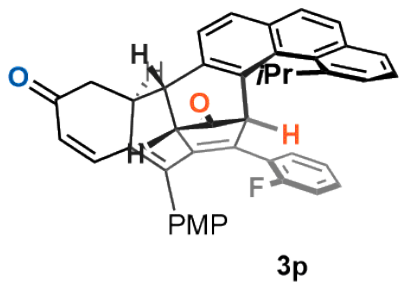

— -113.45

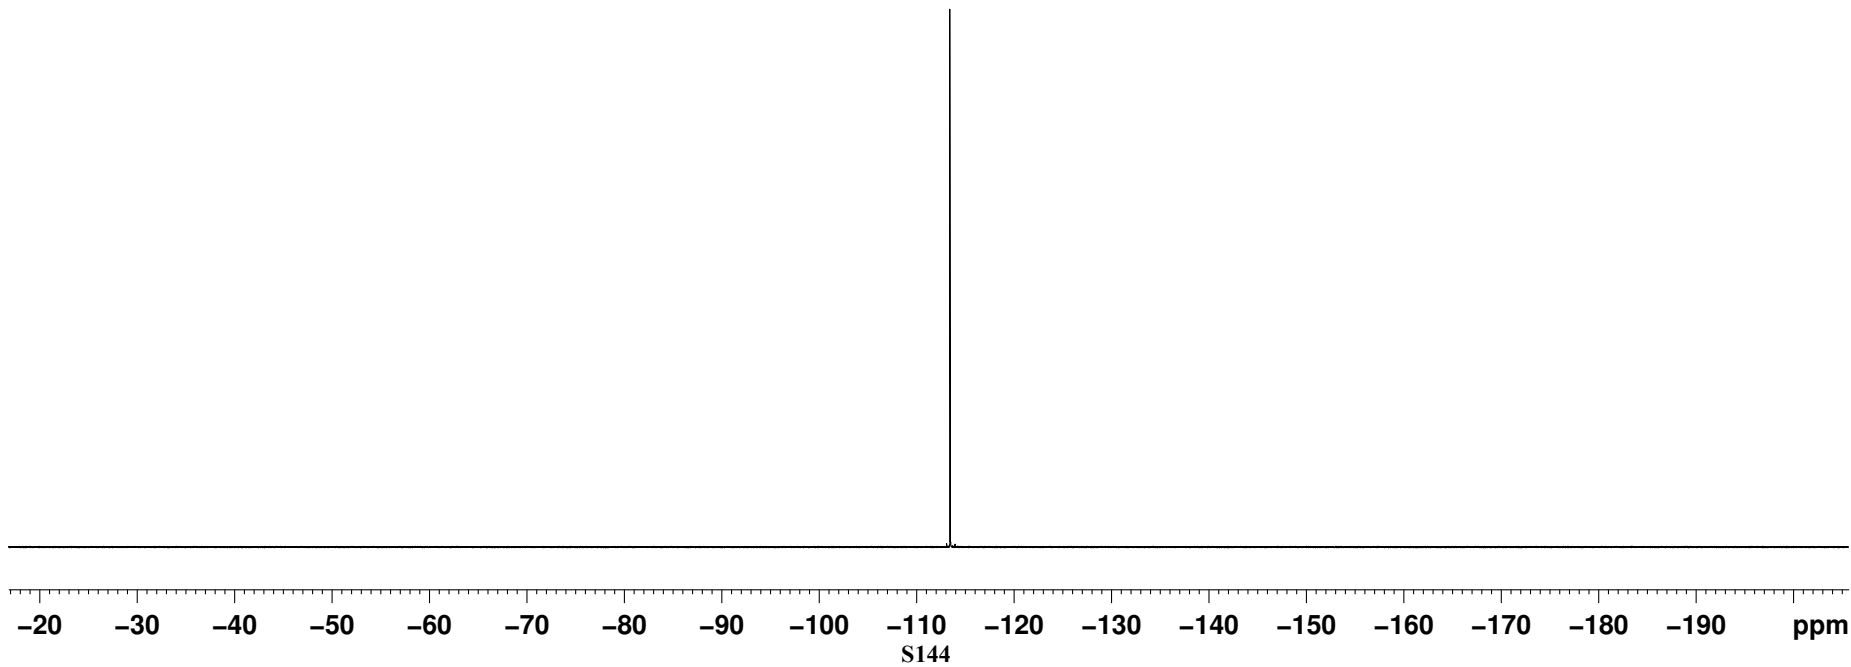

7.718  
7.691  
7.587  
7.561  
7.535  
7.510  
7.484  
7.446  
7.413  
7.389  
7.361  
7.336  
7.308  
7.245  
7.014  
6.986  
6.738  
6.710  
6.475  
6.450  
6.296  
6.271  
6.246  
5.931  
5.898  
5.695  
5.656

— 5.171

3.892  
3.878  
3.709  
3.627  
3.595  
3.581  
3.563

2.996  
2.975  
2.952

1.786  
1.765  
1.611

— 1.259

0.508  
0.486

— 0.000

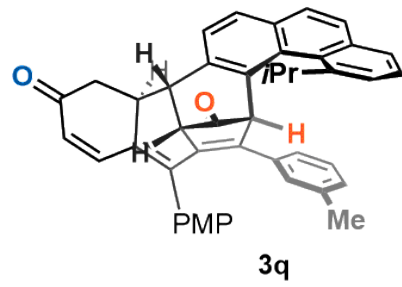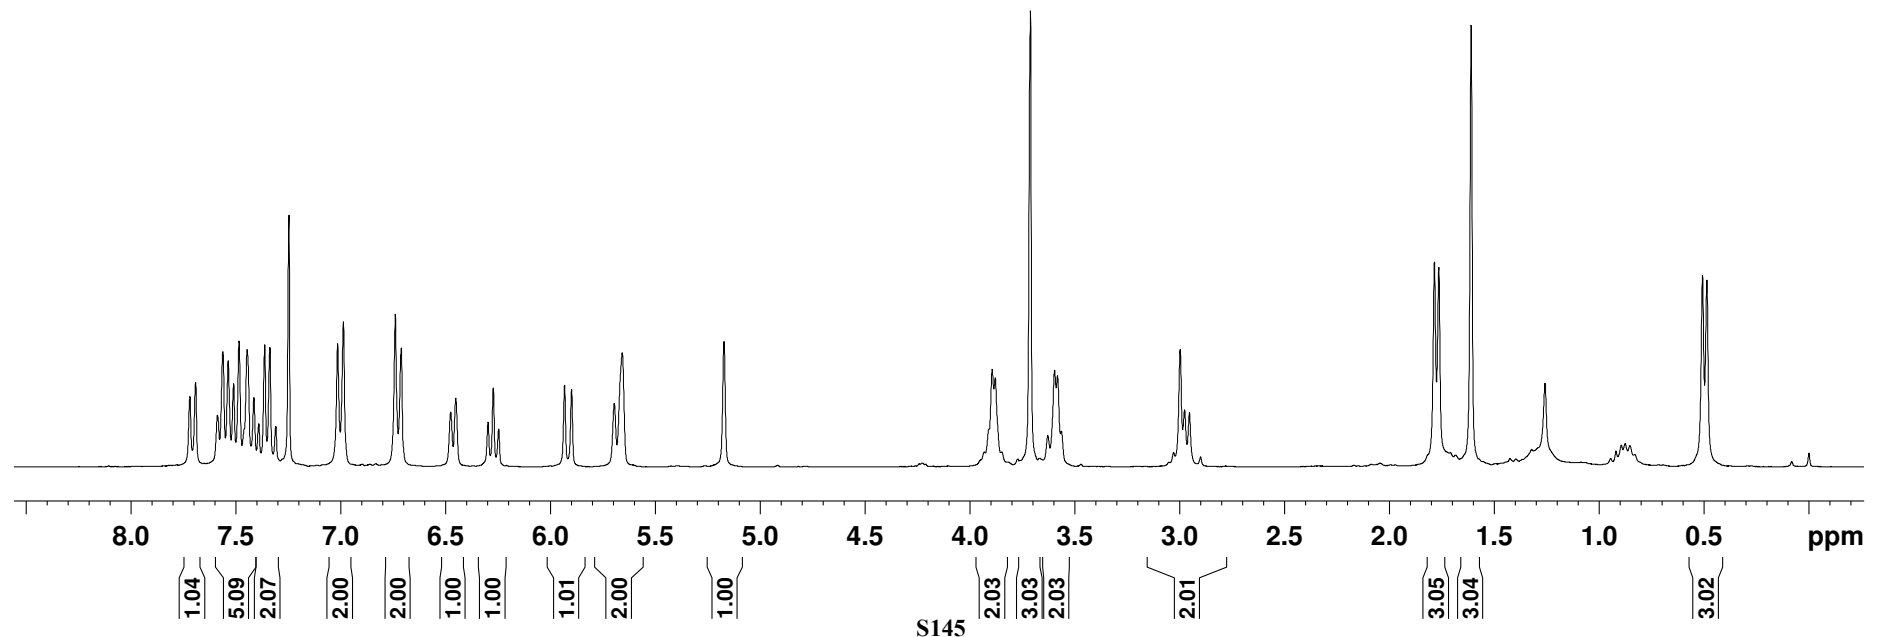

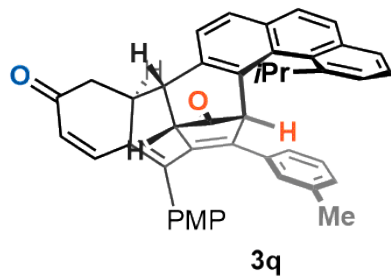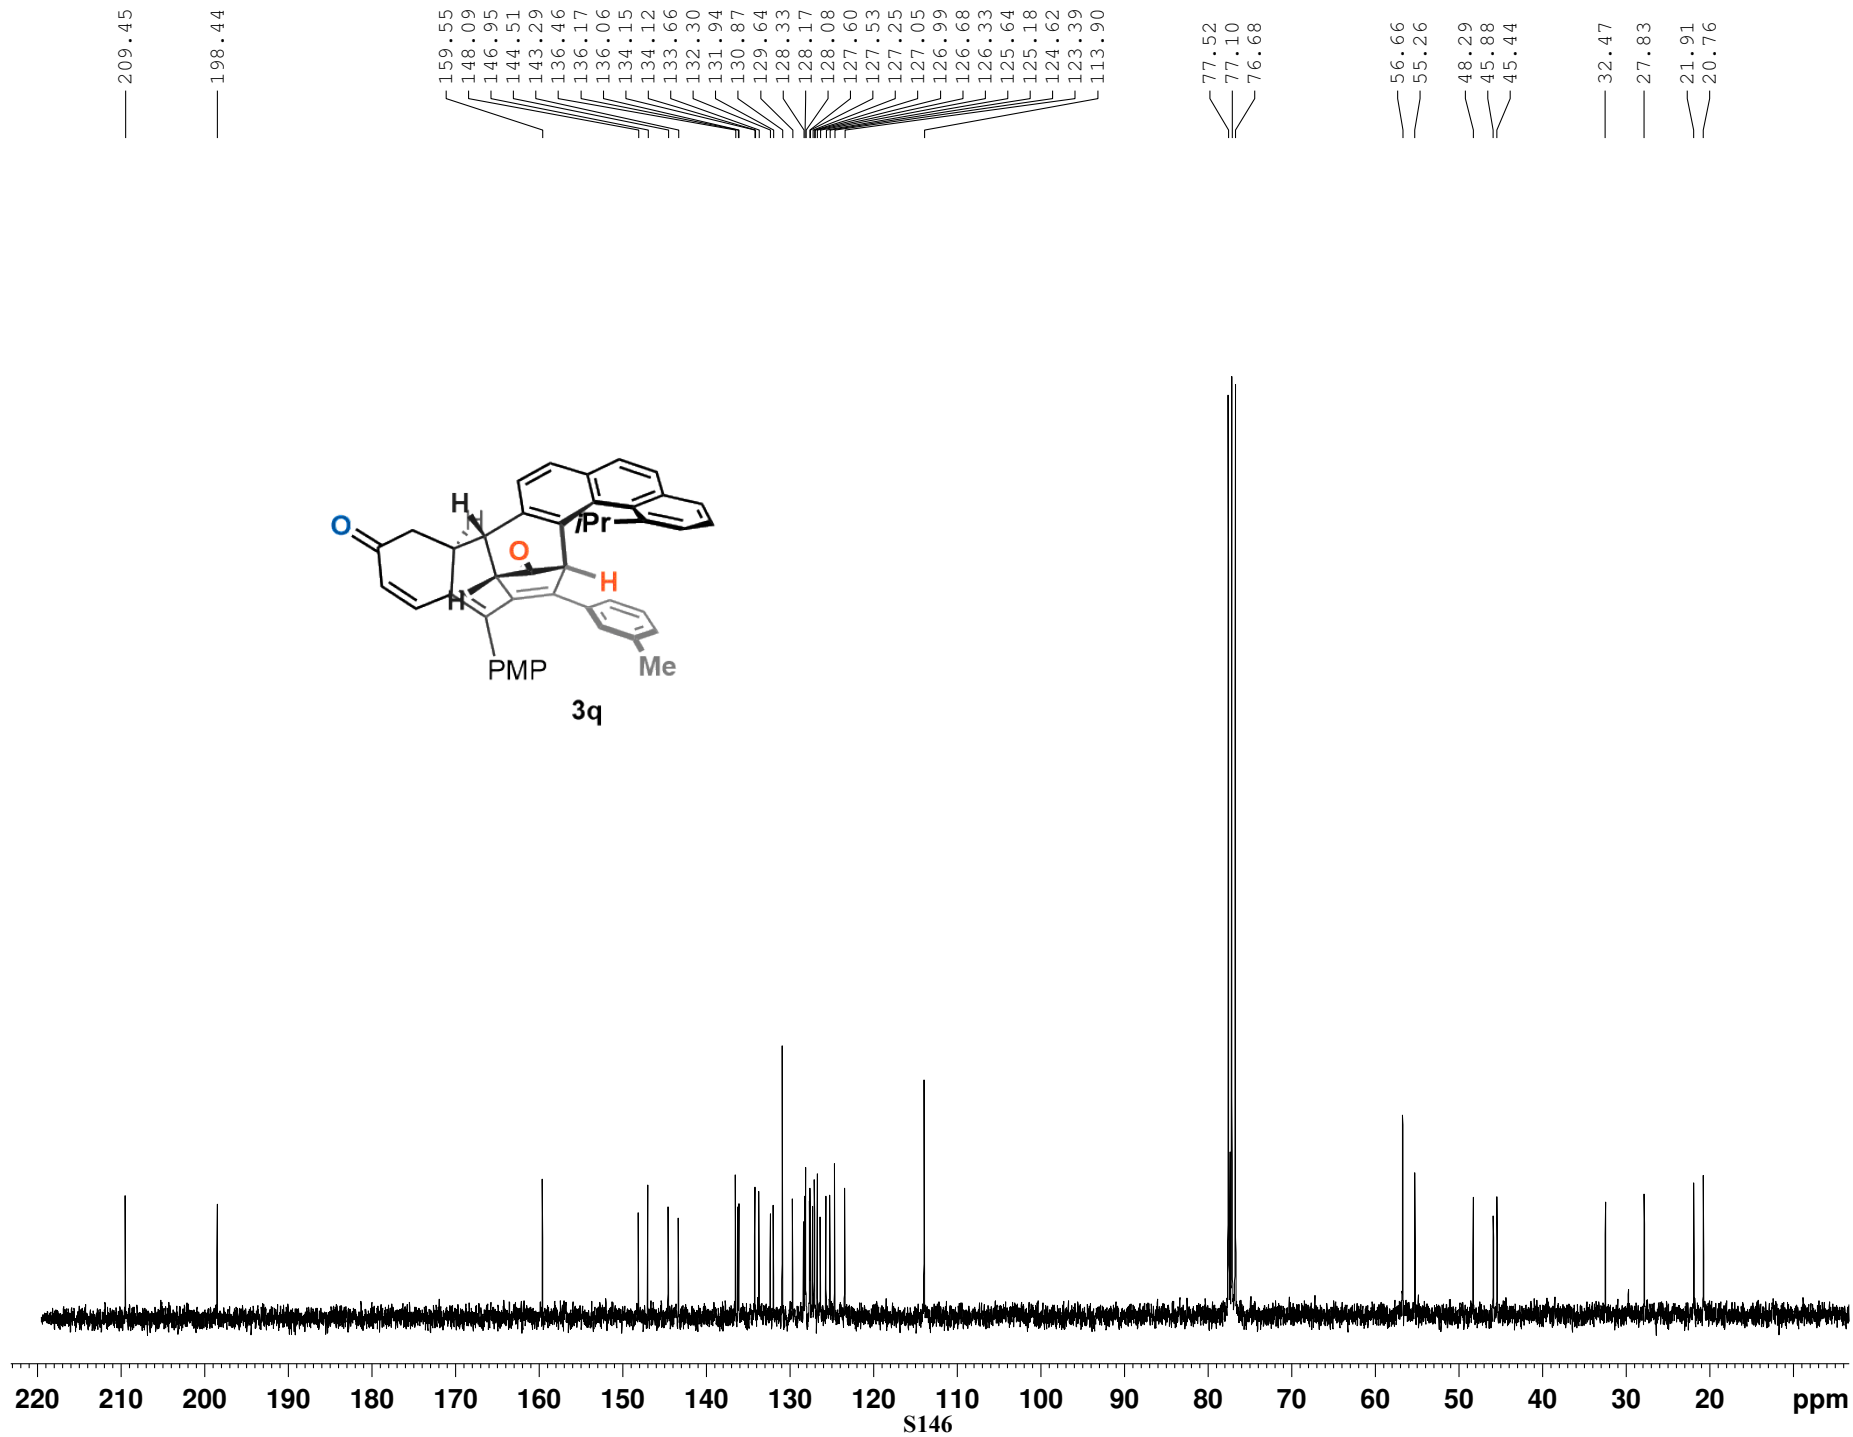

7.707  
7.680  
7.545  
7.497  
7.472  
7.441  
7.413  
7.289  
7.253  
6.993  
6.966  
6.674  
6.647  
6.285  
6.259  
6.208  
6.181  
5.942  
5.908  
5.527  
5.465  
5.440  
5.182

3.890  
3.873  
3.668  
3.632  
3.612  
3.595  
3.194  
2.995  
2.974  
2.951

1.798  
1.777

1.260

0.493  
0.473

0.000

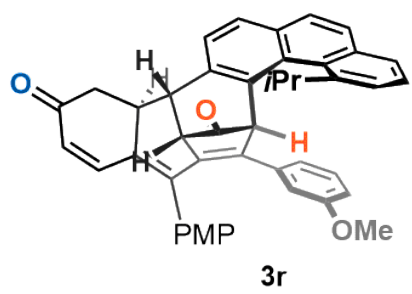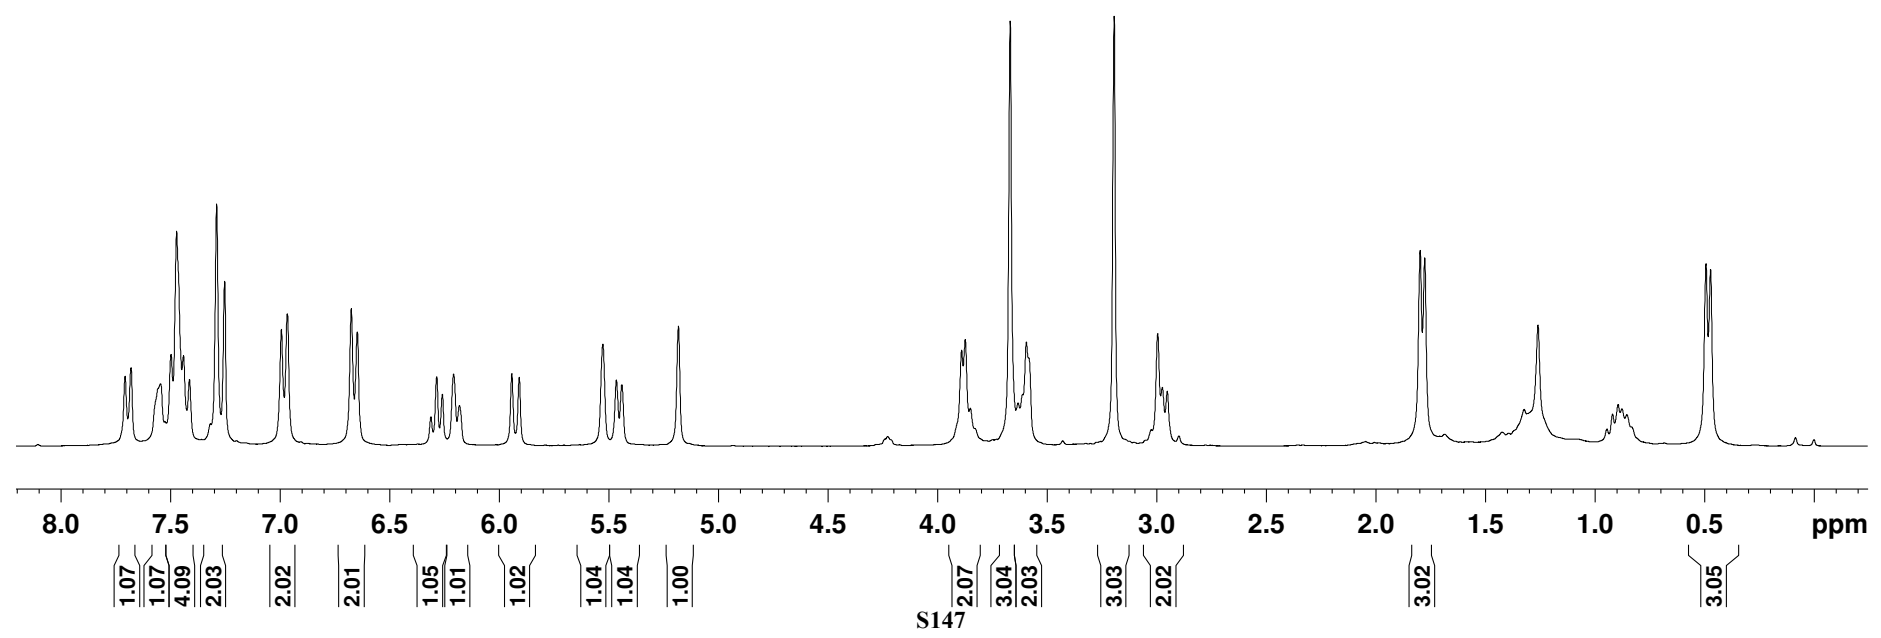

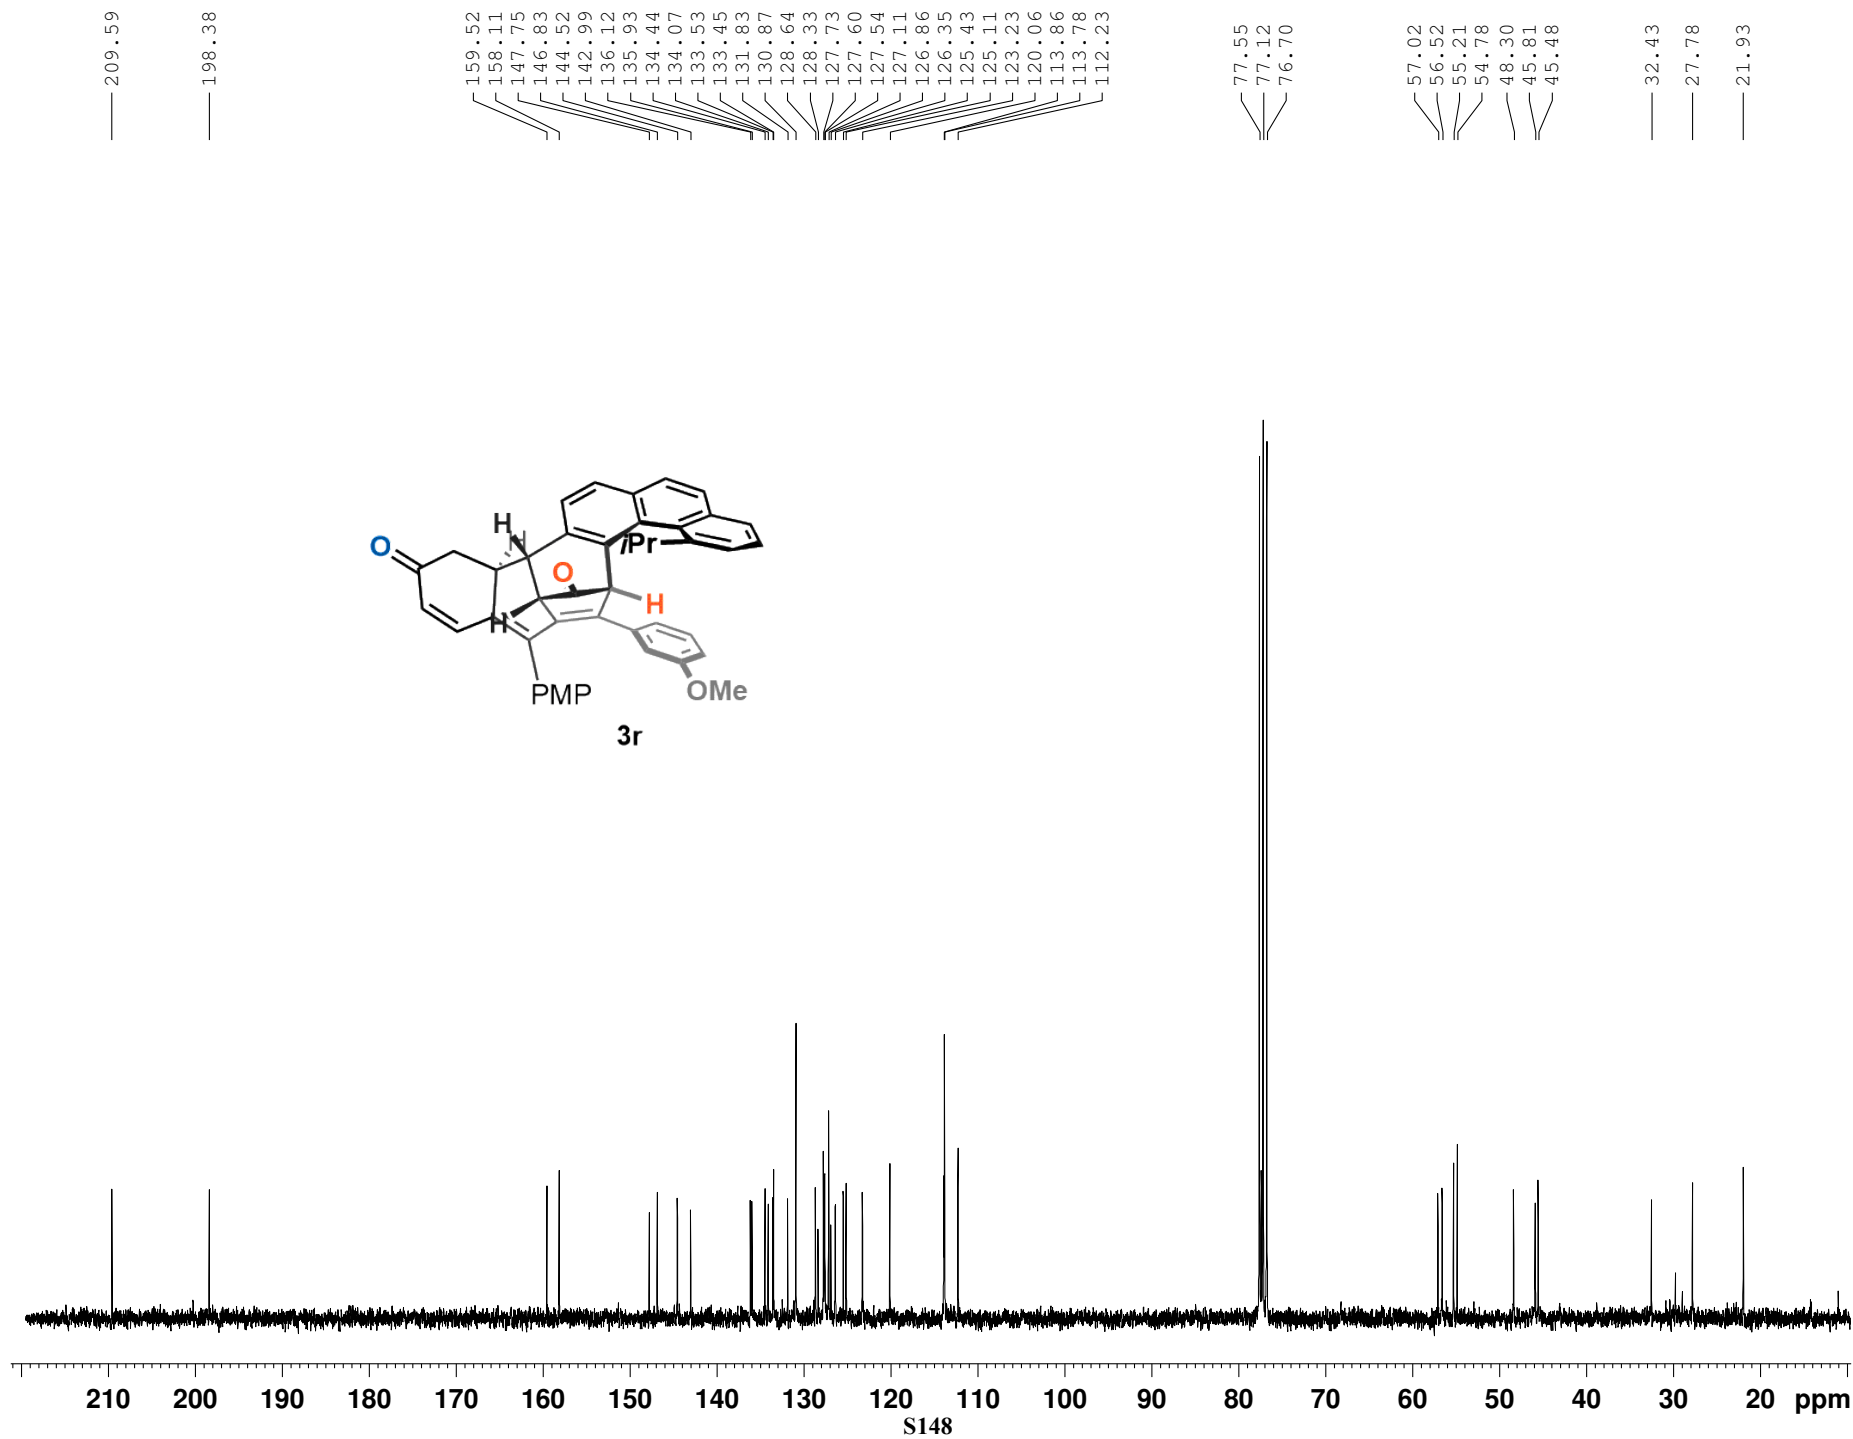

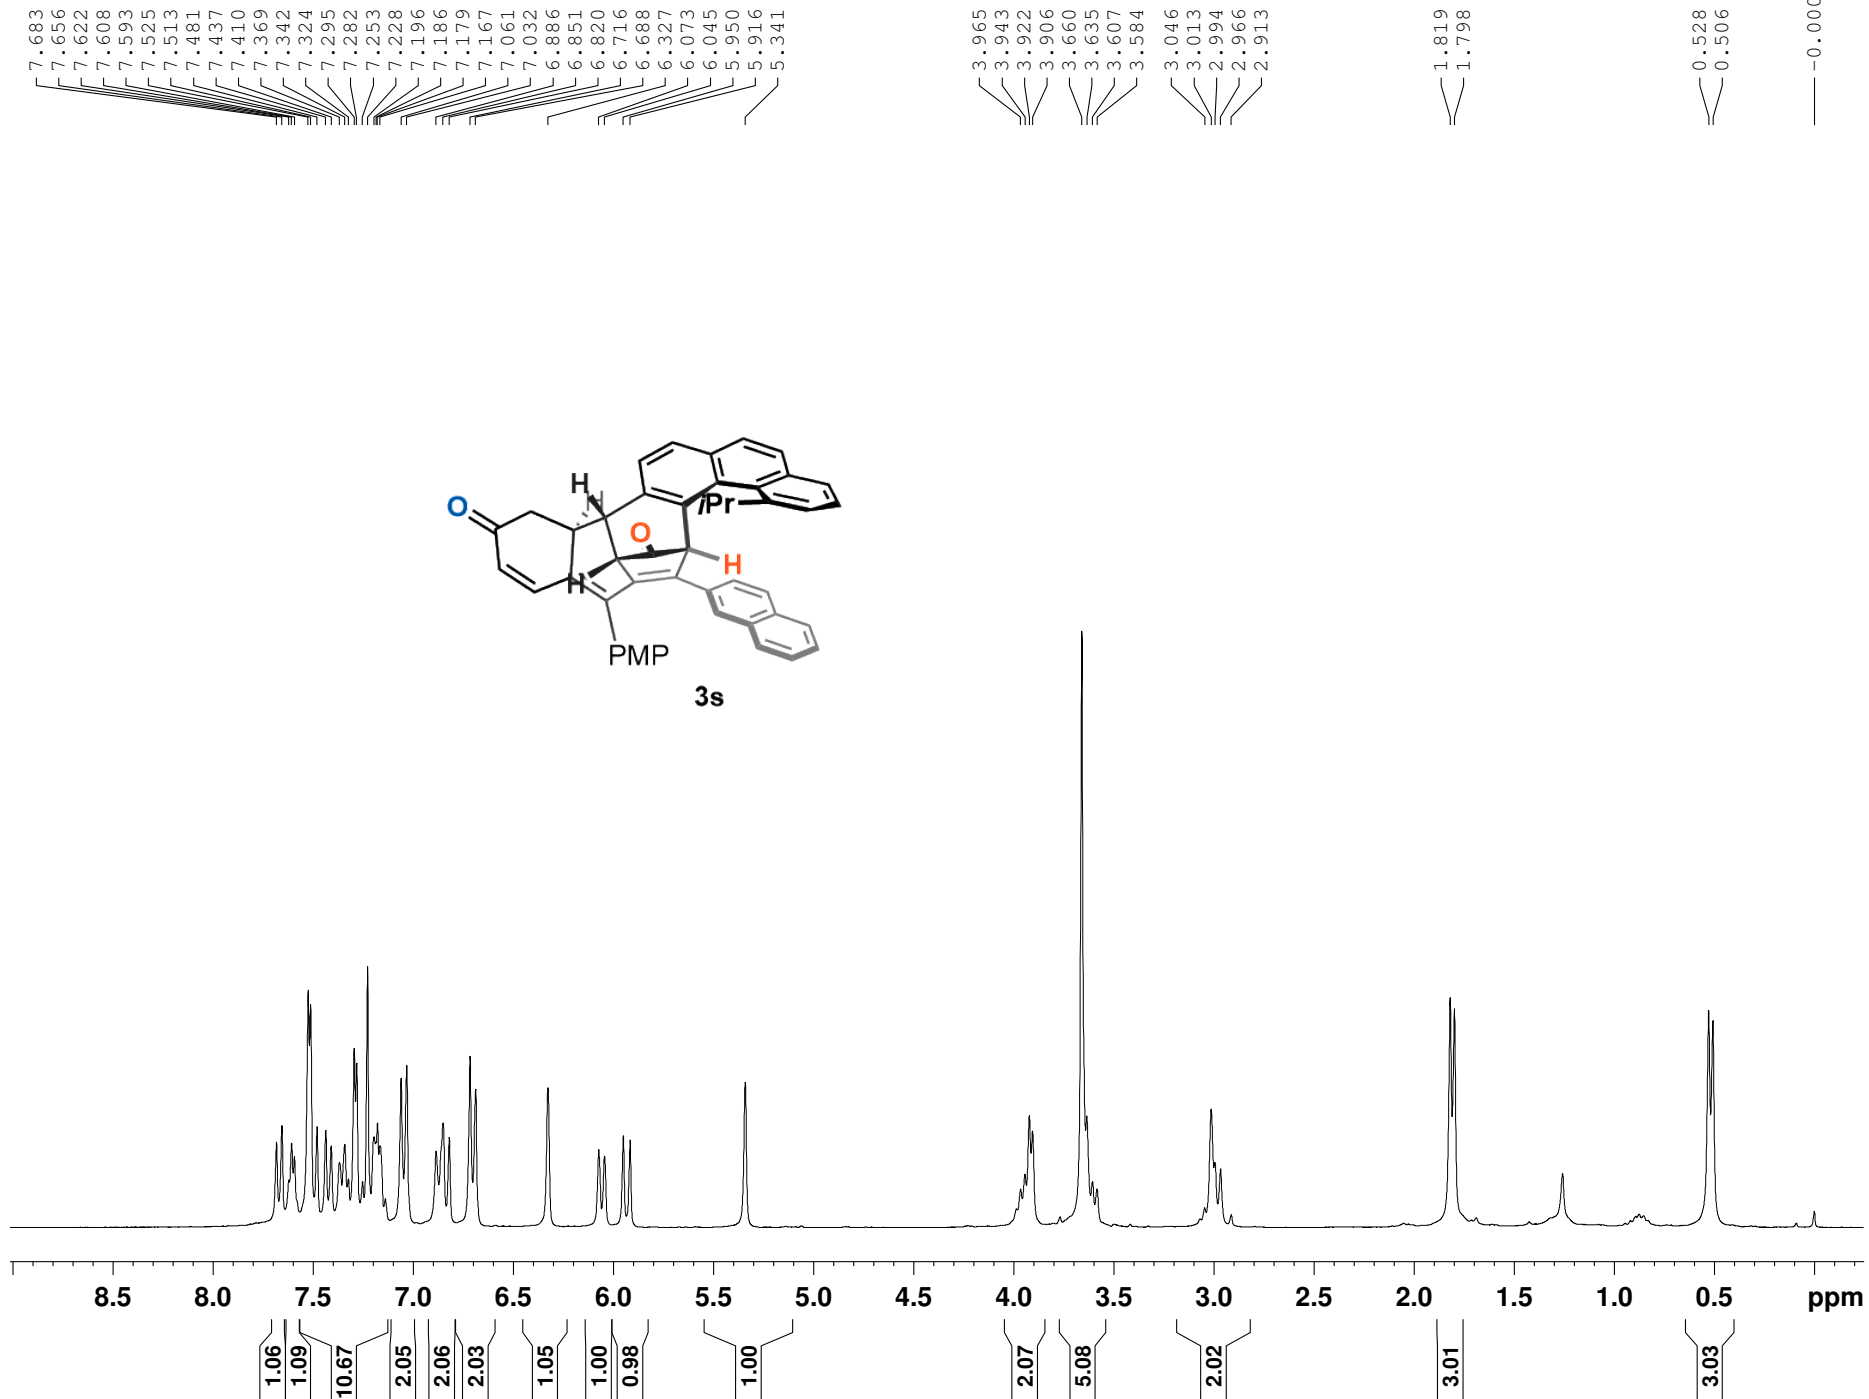

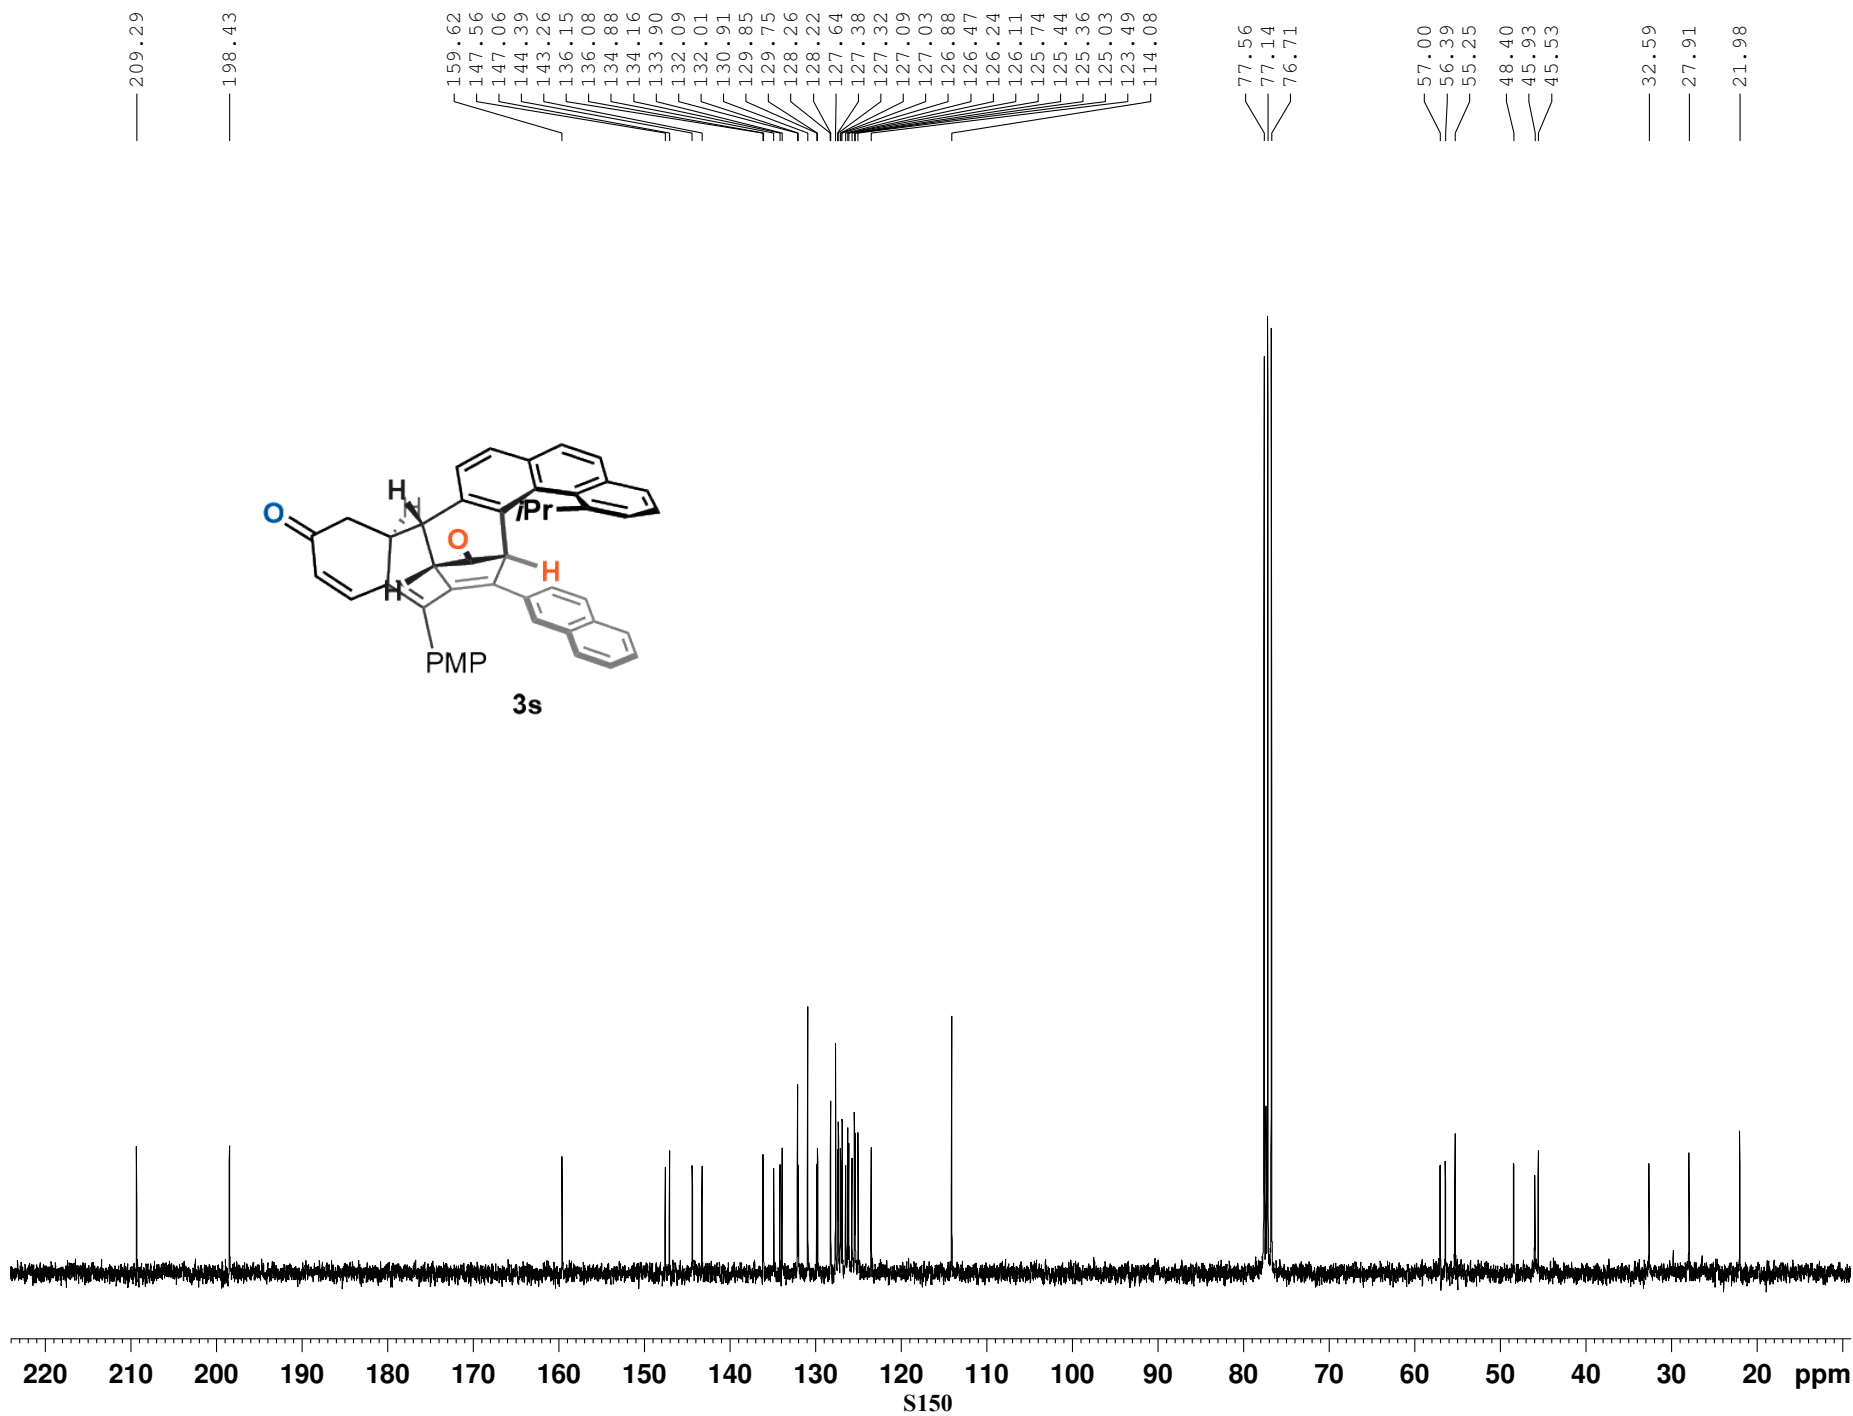

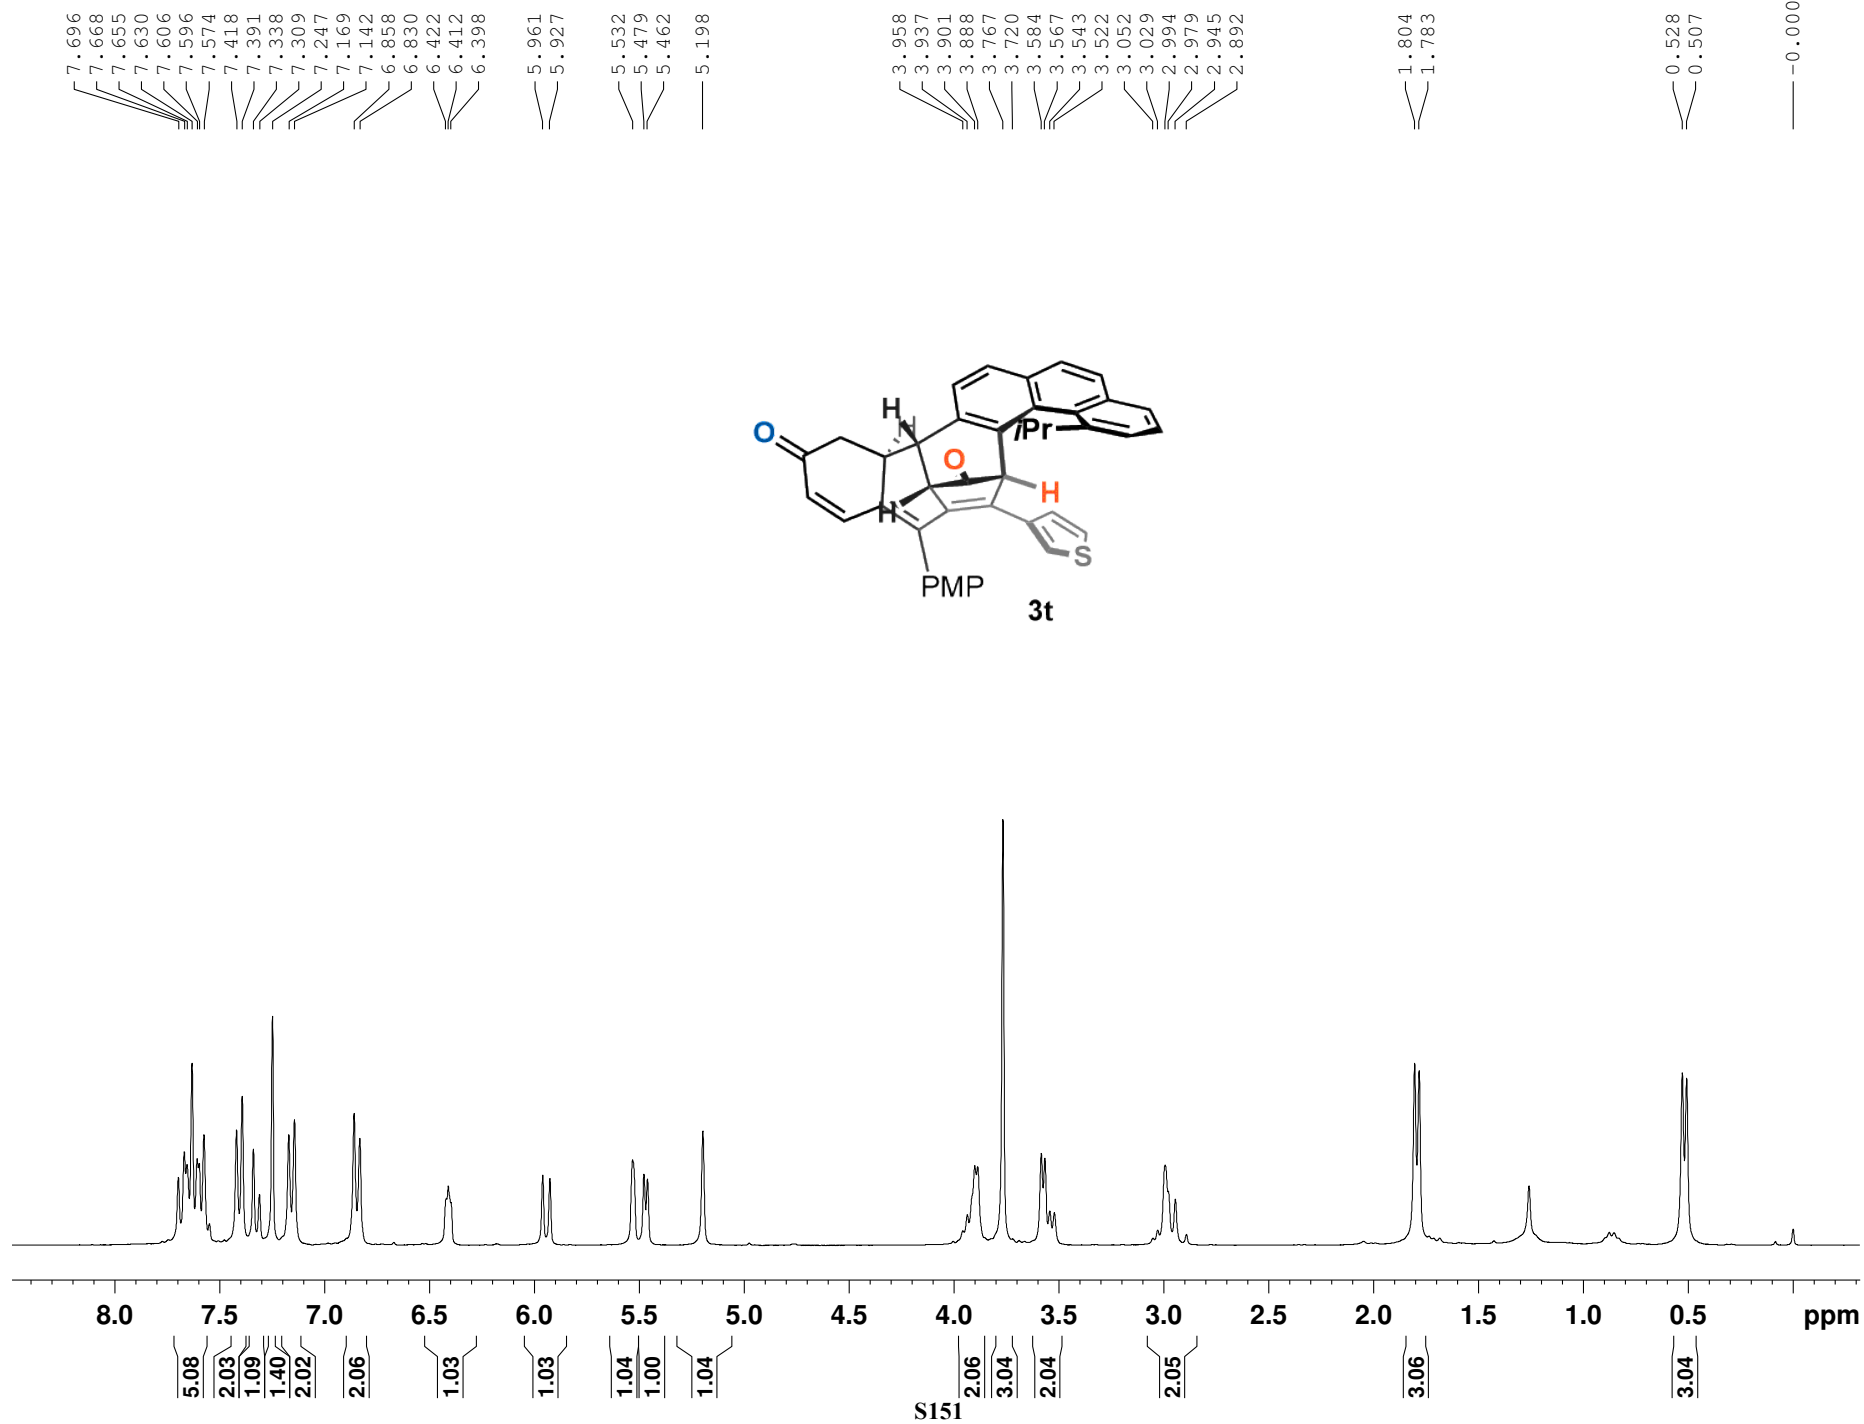



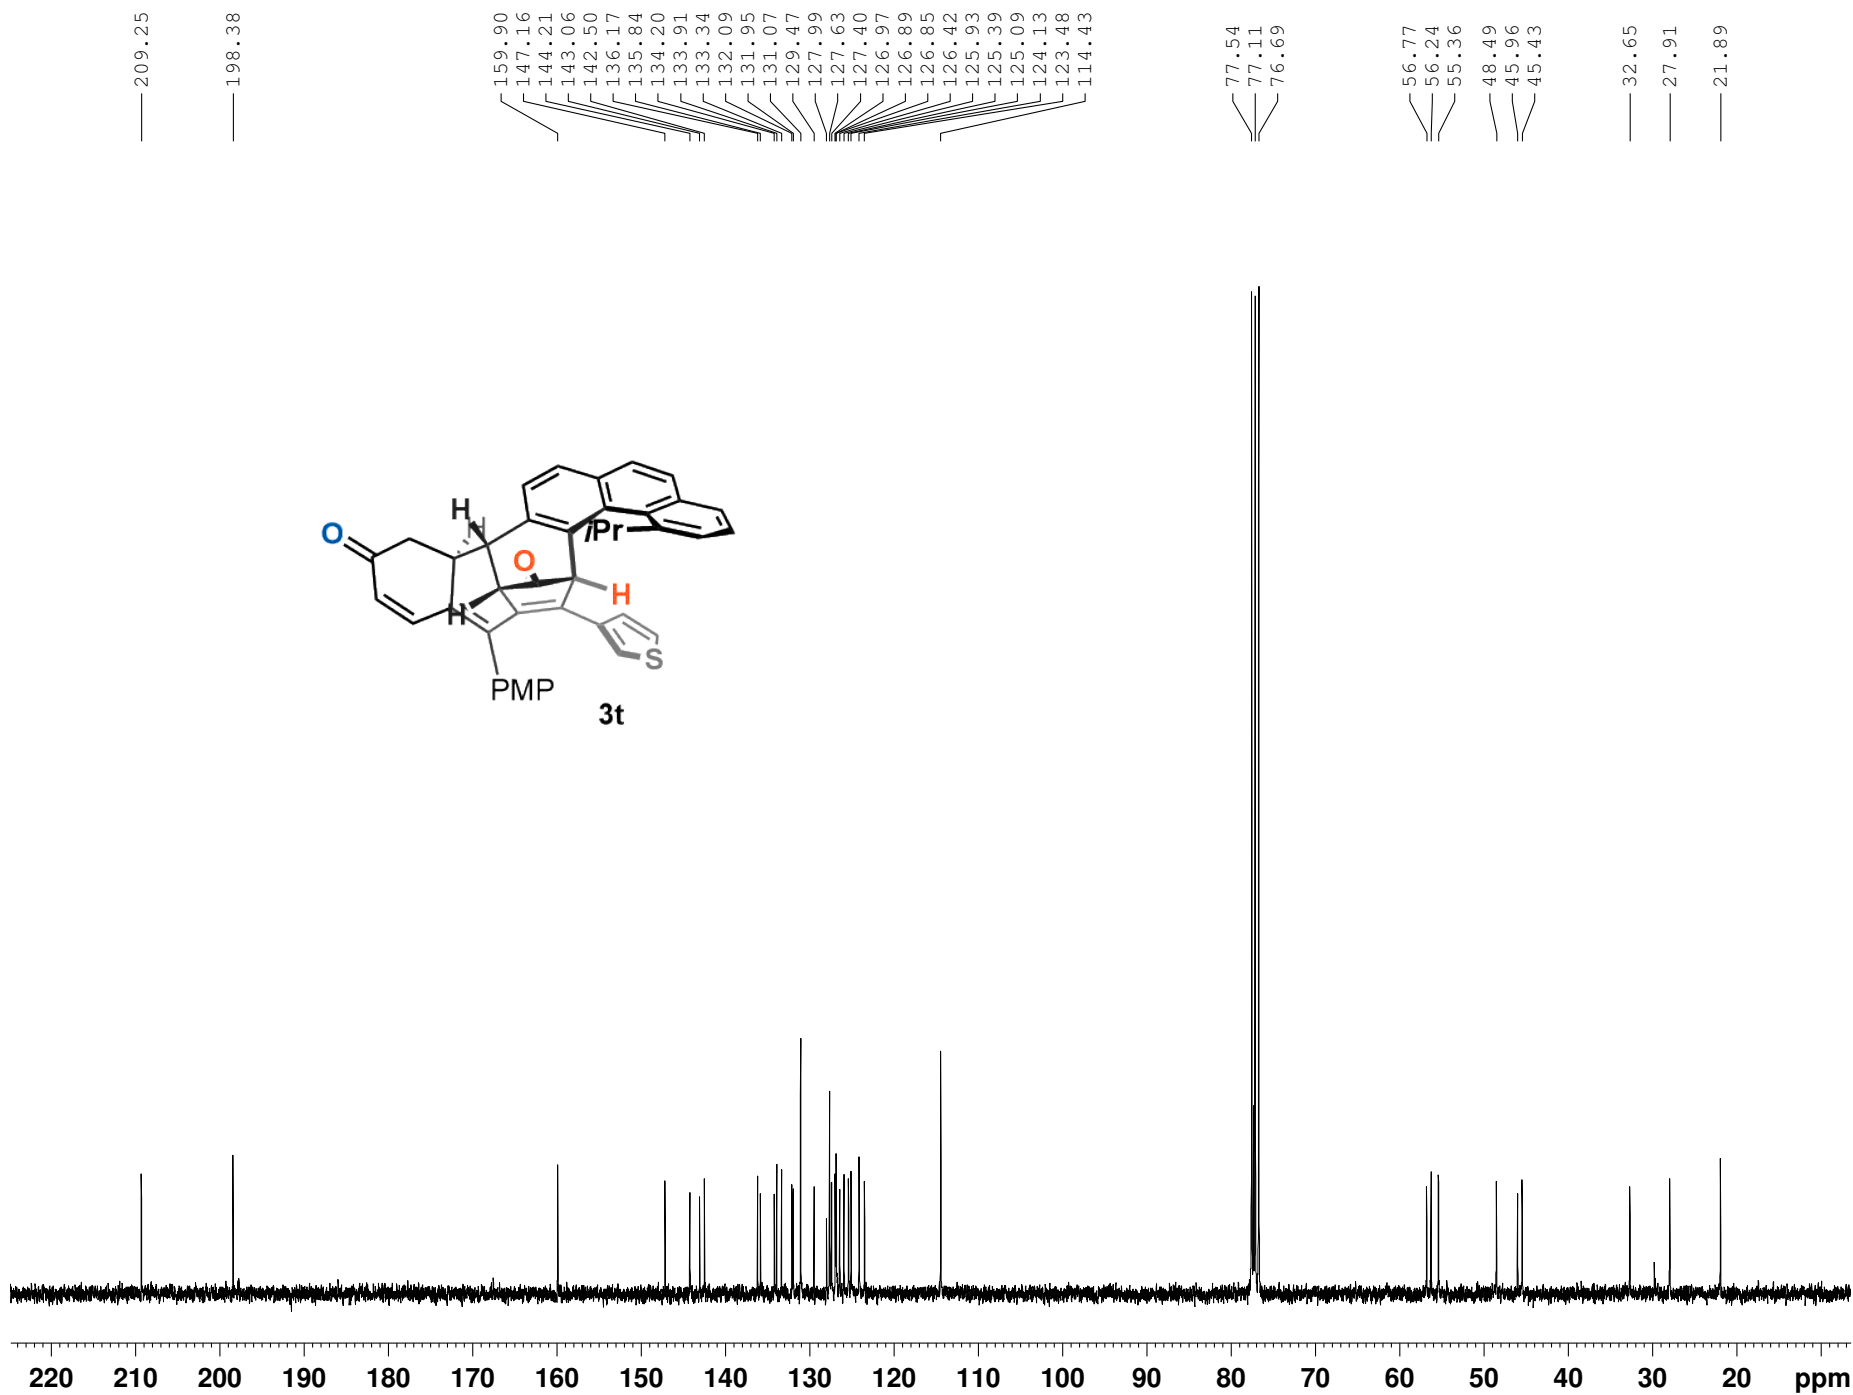

7.749  
7.722  
7.606  
7.582  
7.567  
7.532  
7.522  
7.509  
7.488  
7.471  
7.443  
7.417  
7.406  
7.387  
7.378  
7.263  
7.101  
7.073  
6.818  
6.790

5.910  
5.876

4.839

3.834  
3.813  
3.781  
3.760  
3.527  
3.495  
3.414  
3.399

2.921  
2.888

1.769  
1.748

0.542  
0.502  
0.477  
0.153  
0.135  
0.112  
0.000

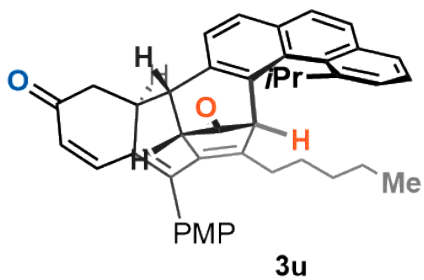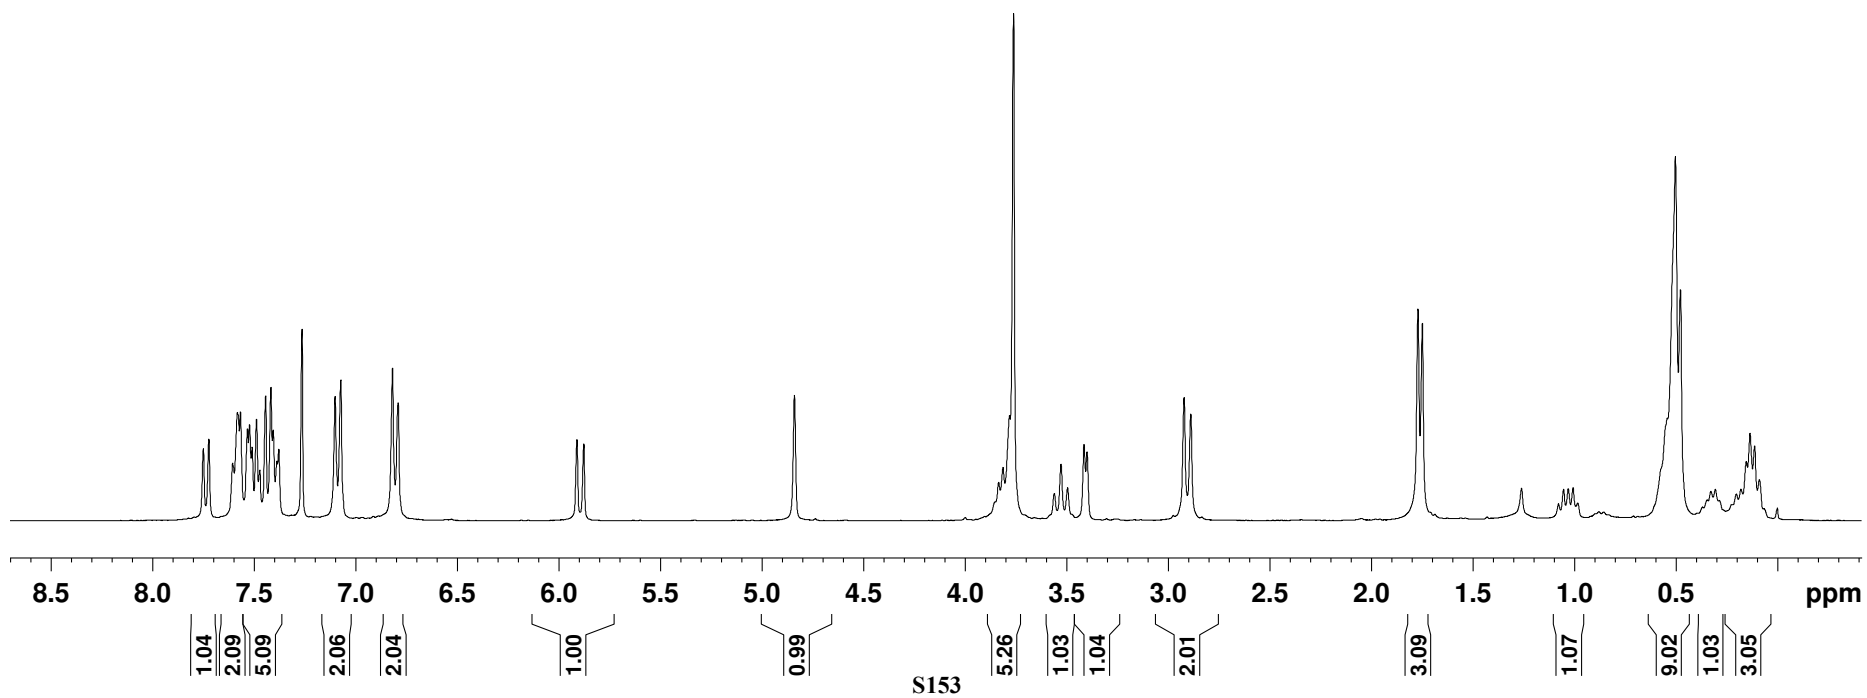

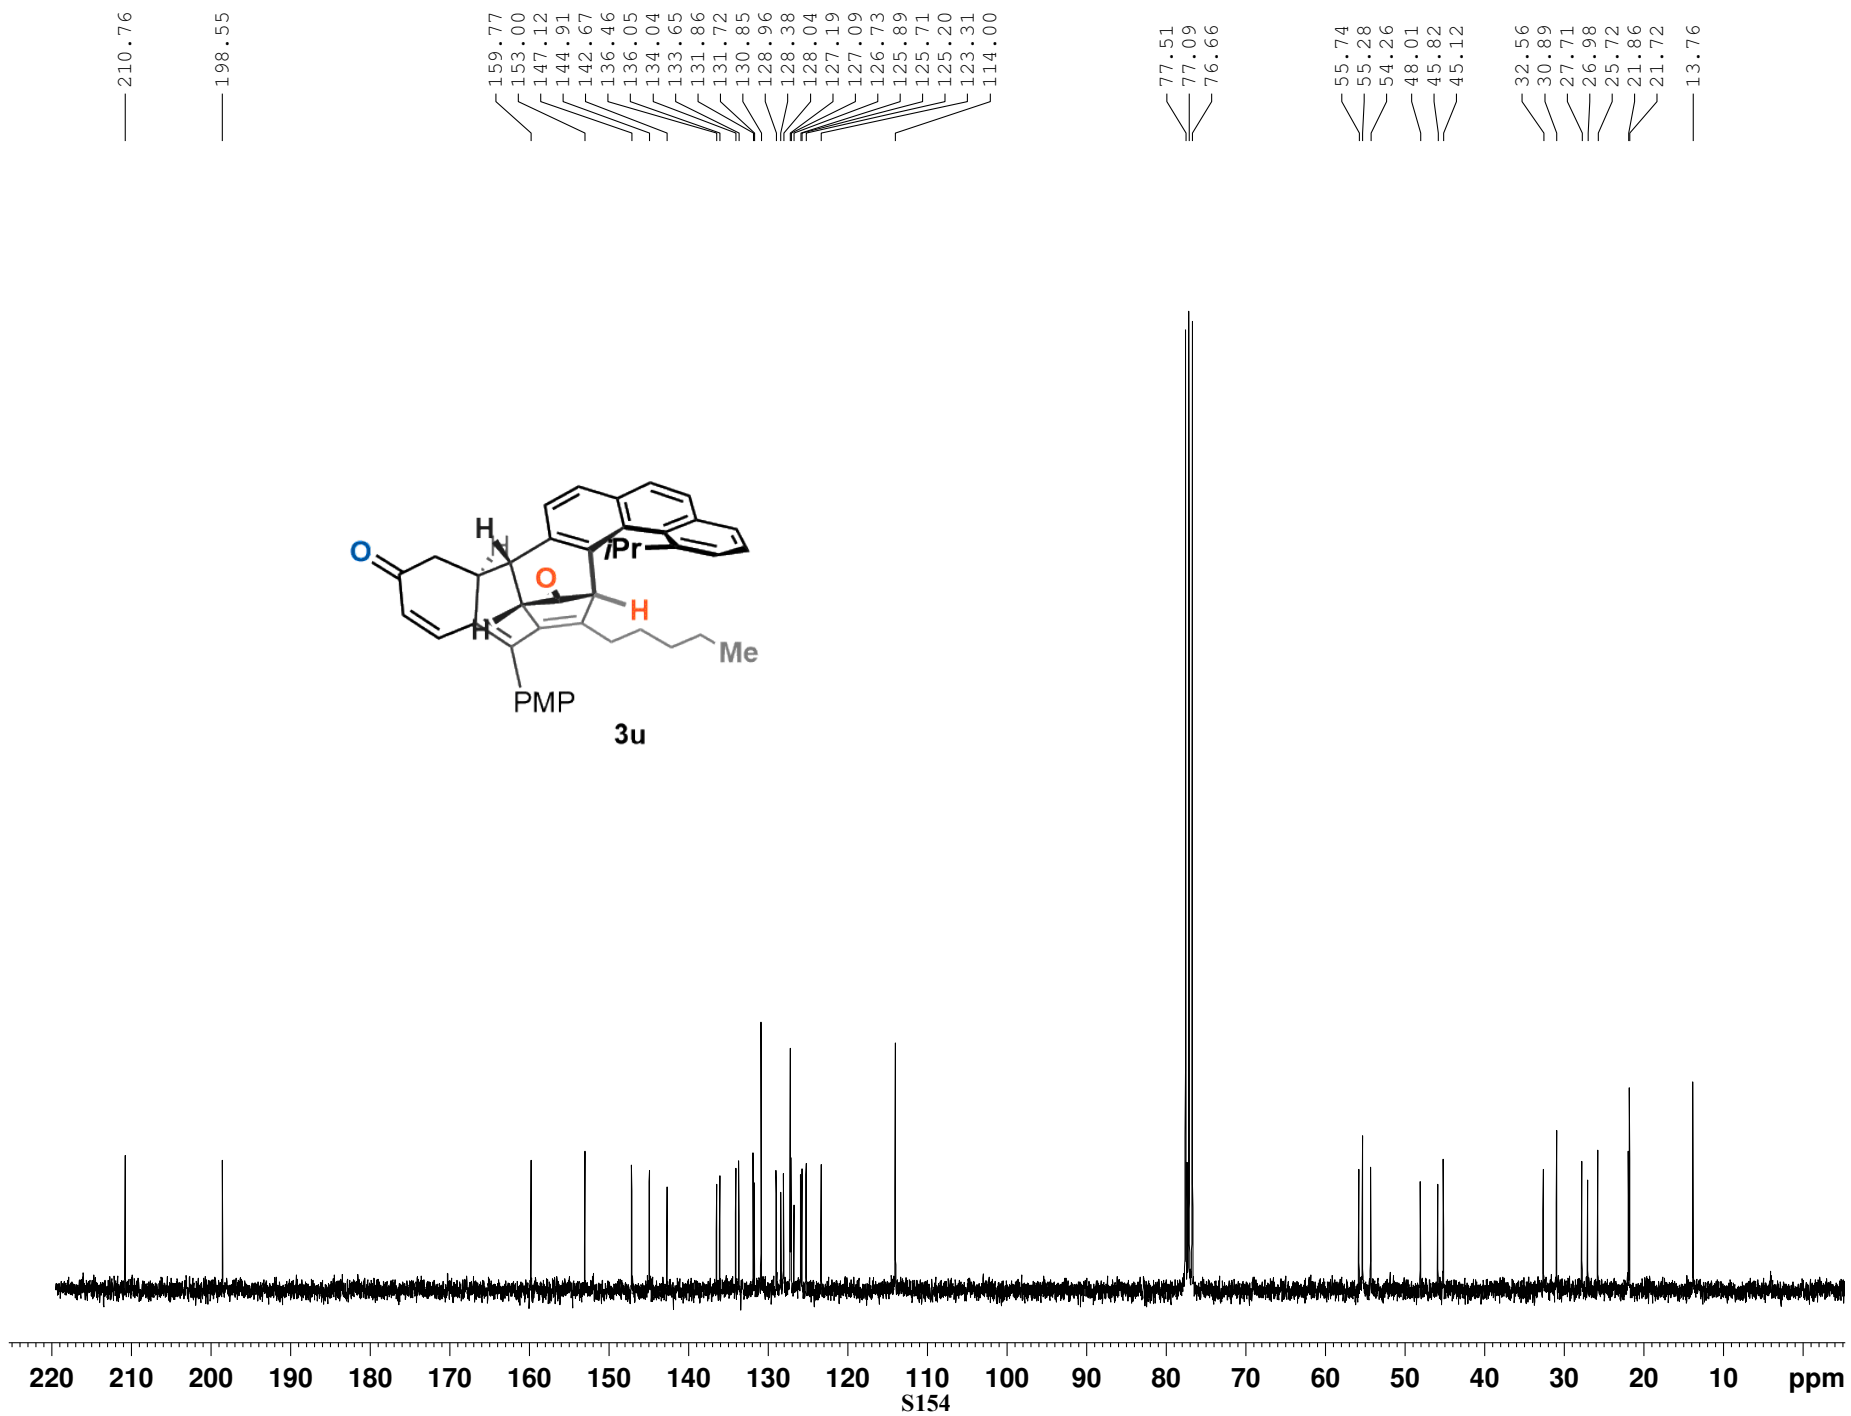

7.746  
7.719  
7.572  
7.529  
7.524  
7.489  
7.441  
7.414  
7.263  
7.100  
7.073  
6.816  
6.789

5.910  
5.877

4.835

3.759  
3.526  
3.412  
3.398

2.921  
2.888

1.771  
1.750

1.260  
1.055  
0.925  
0.904  
0.879

0.498  
0.477  
0.318  
0.295  
0.110  
0.087  
0.002

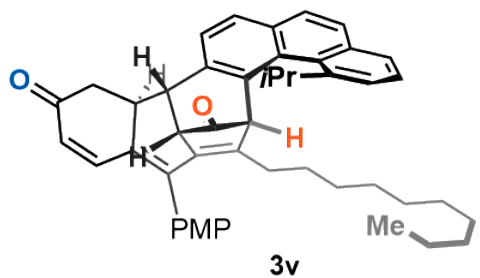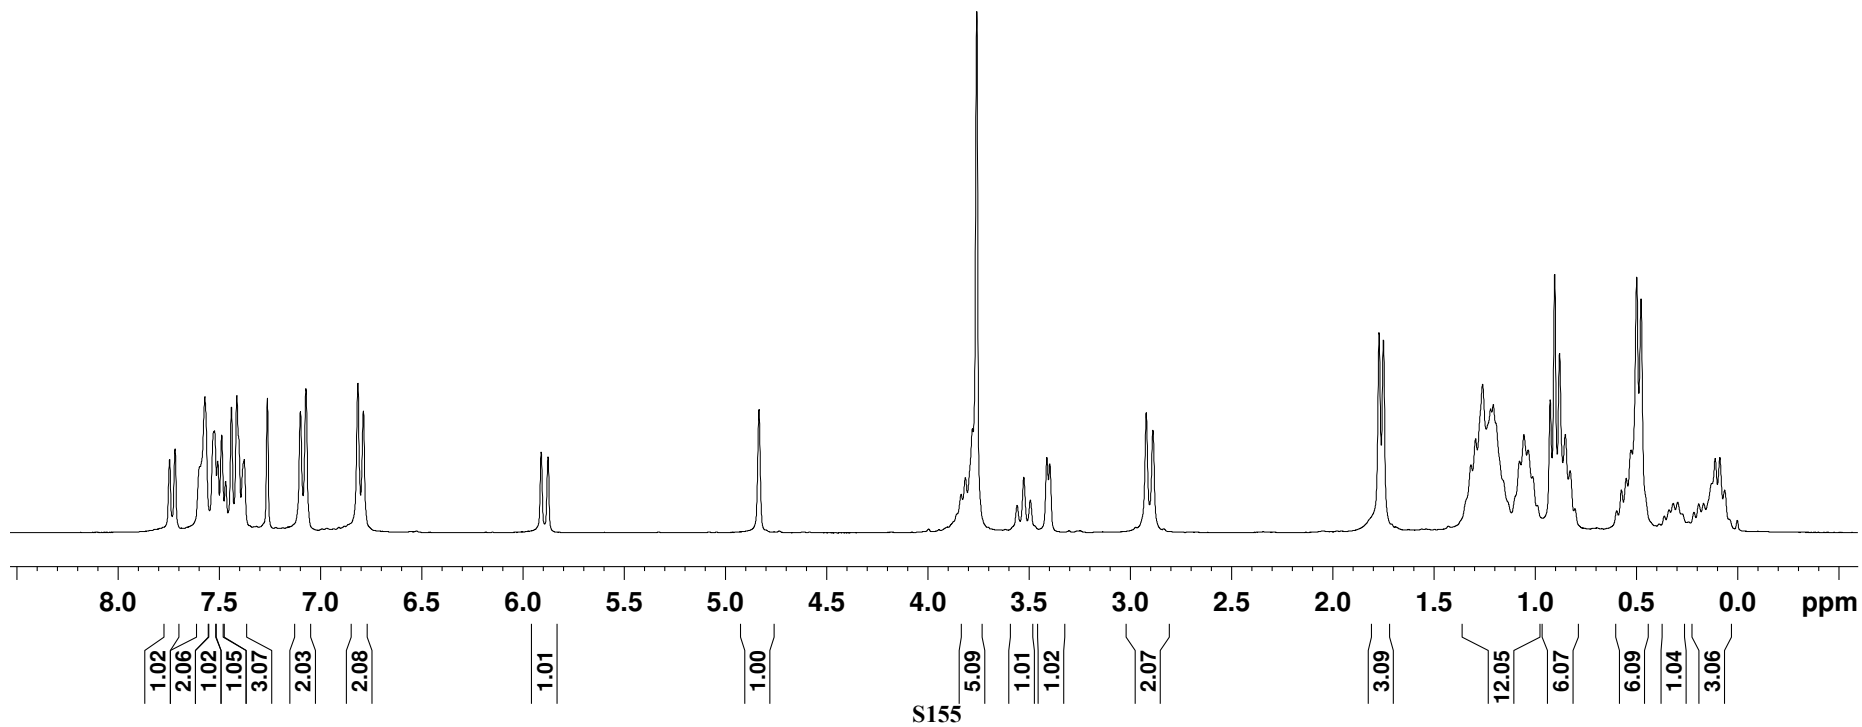

— 210.73

— 198.54

159.77  
153.01  
147.13  
144.90  
142.70  
136.46  
136.07  
134.03  
133.69  
131.86  
131.73  
130.86  
128.93  
128.39  
128.03  
127.19  
127.09  
126.75  
125.88  
125.73  
125.23  
123.30  
113.99

77.52  
77.09  
76.67

55.79  
55.25  
54.26  
48.02  
45.82  
45.13  
32.56  
31.94  
29.48  
29.30  
29.28  
28.70  
27.71  
27.11  
26.10  
22.73  
21.86  
14.20

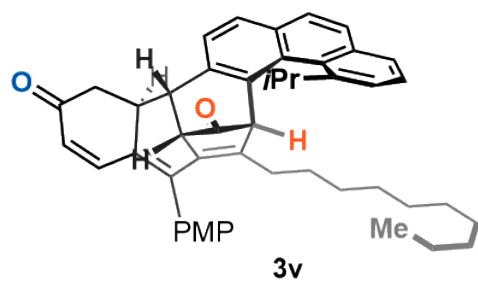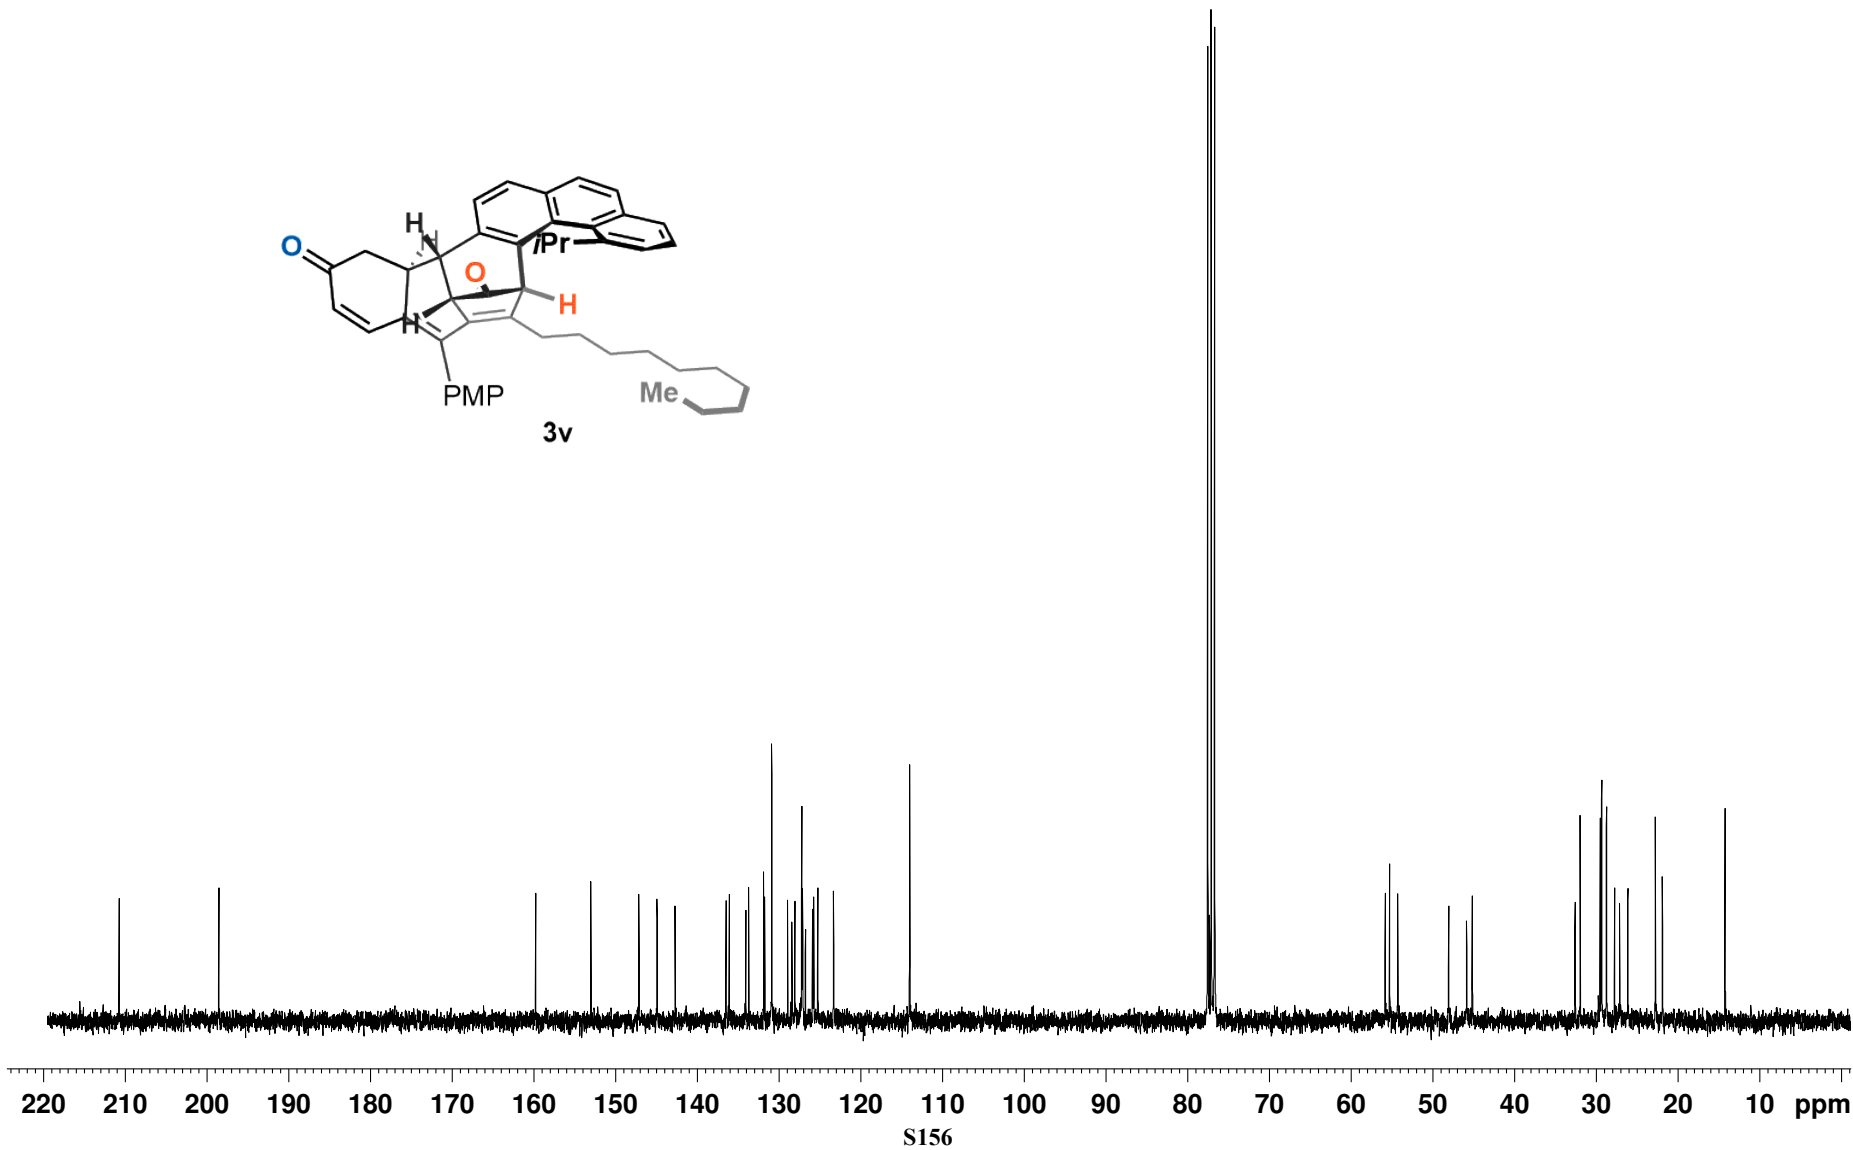

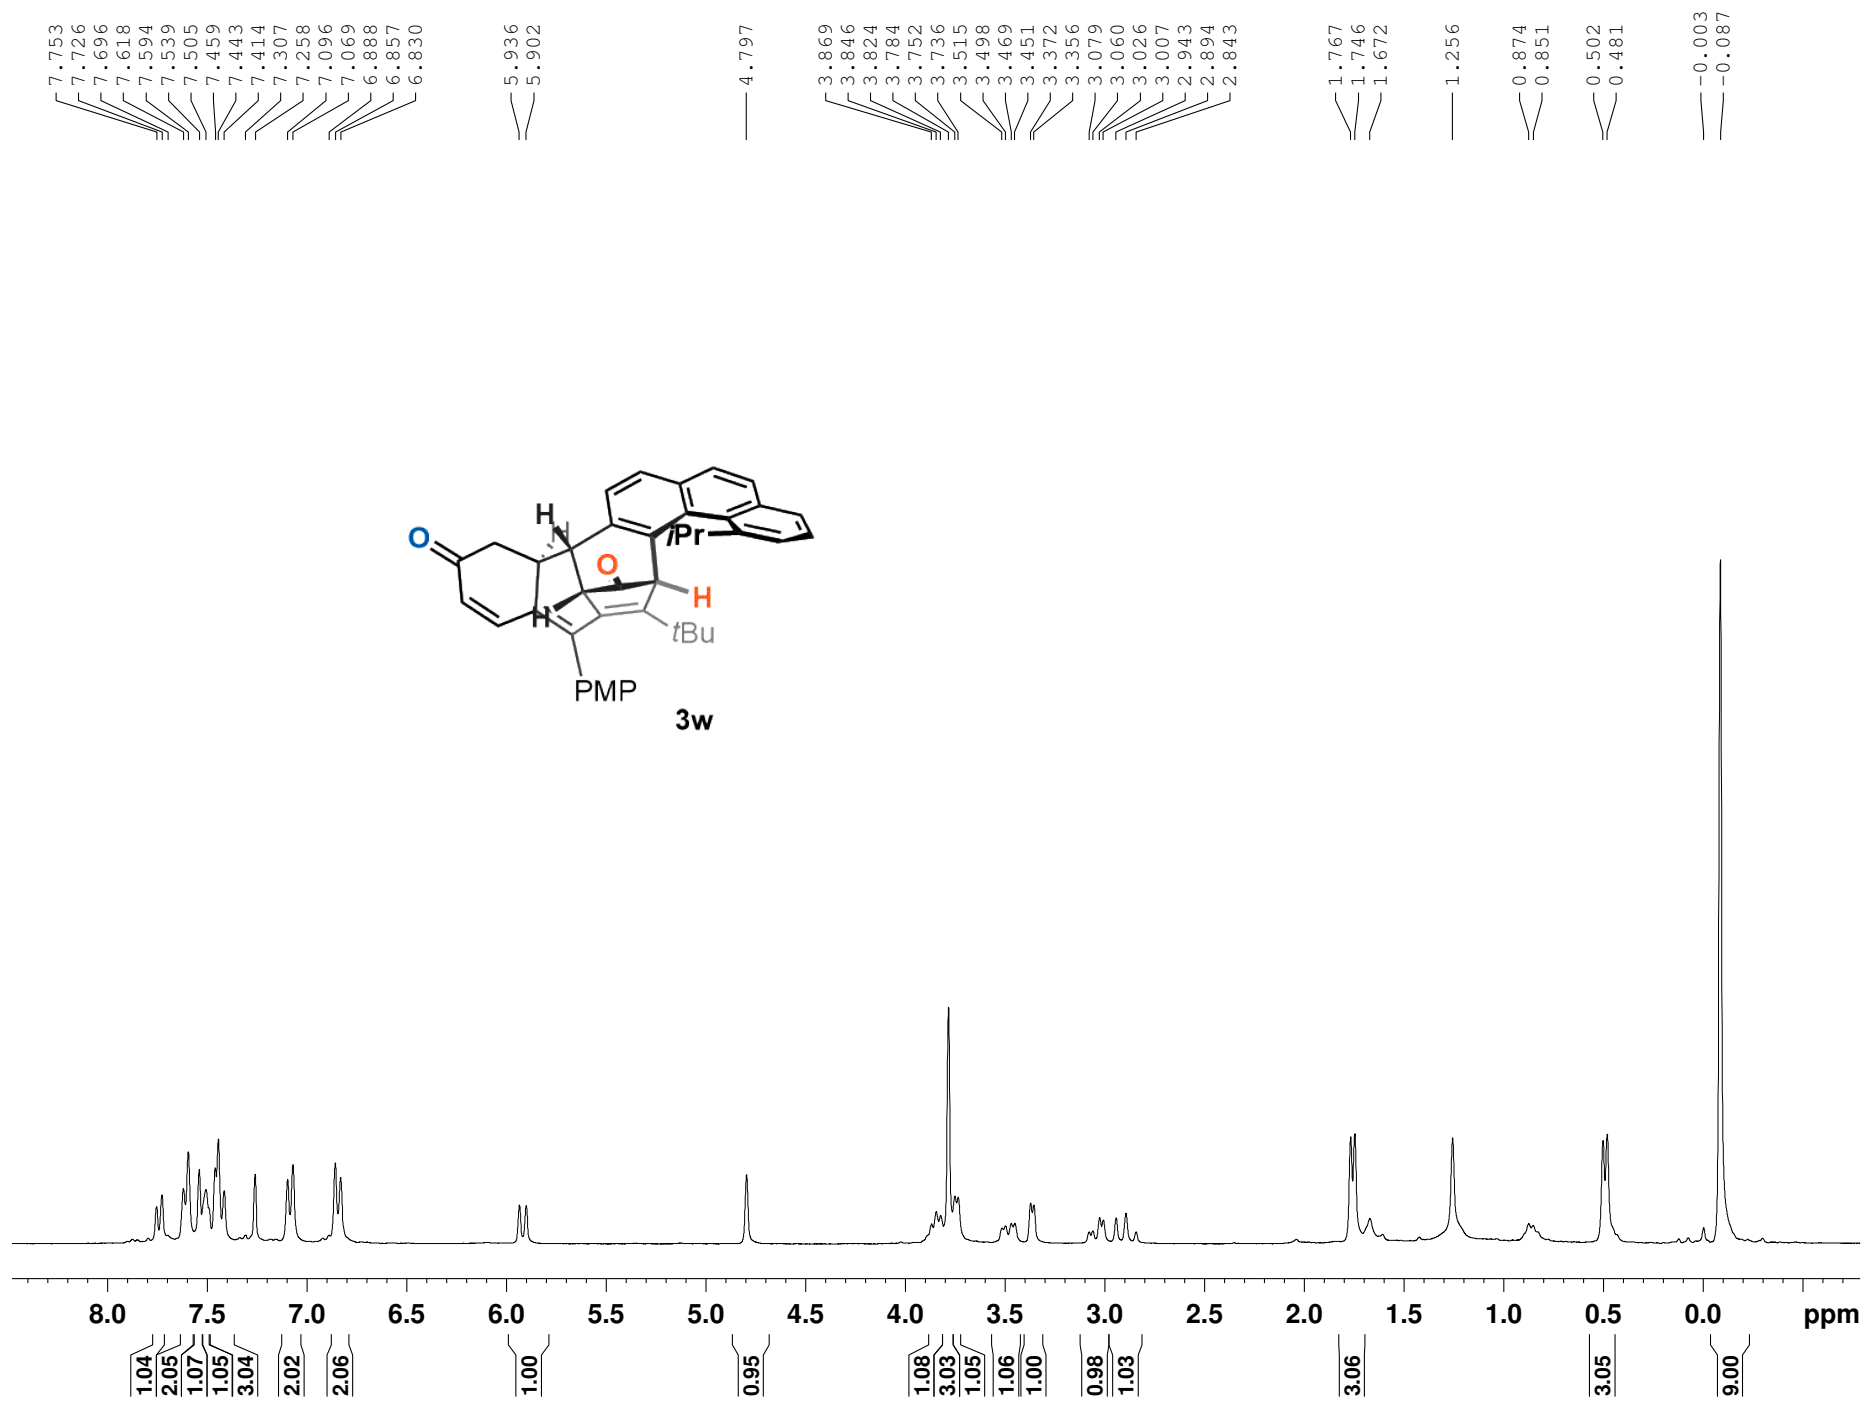

S157

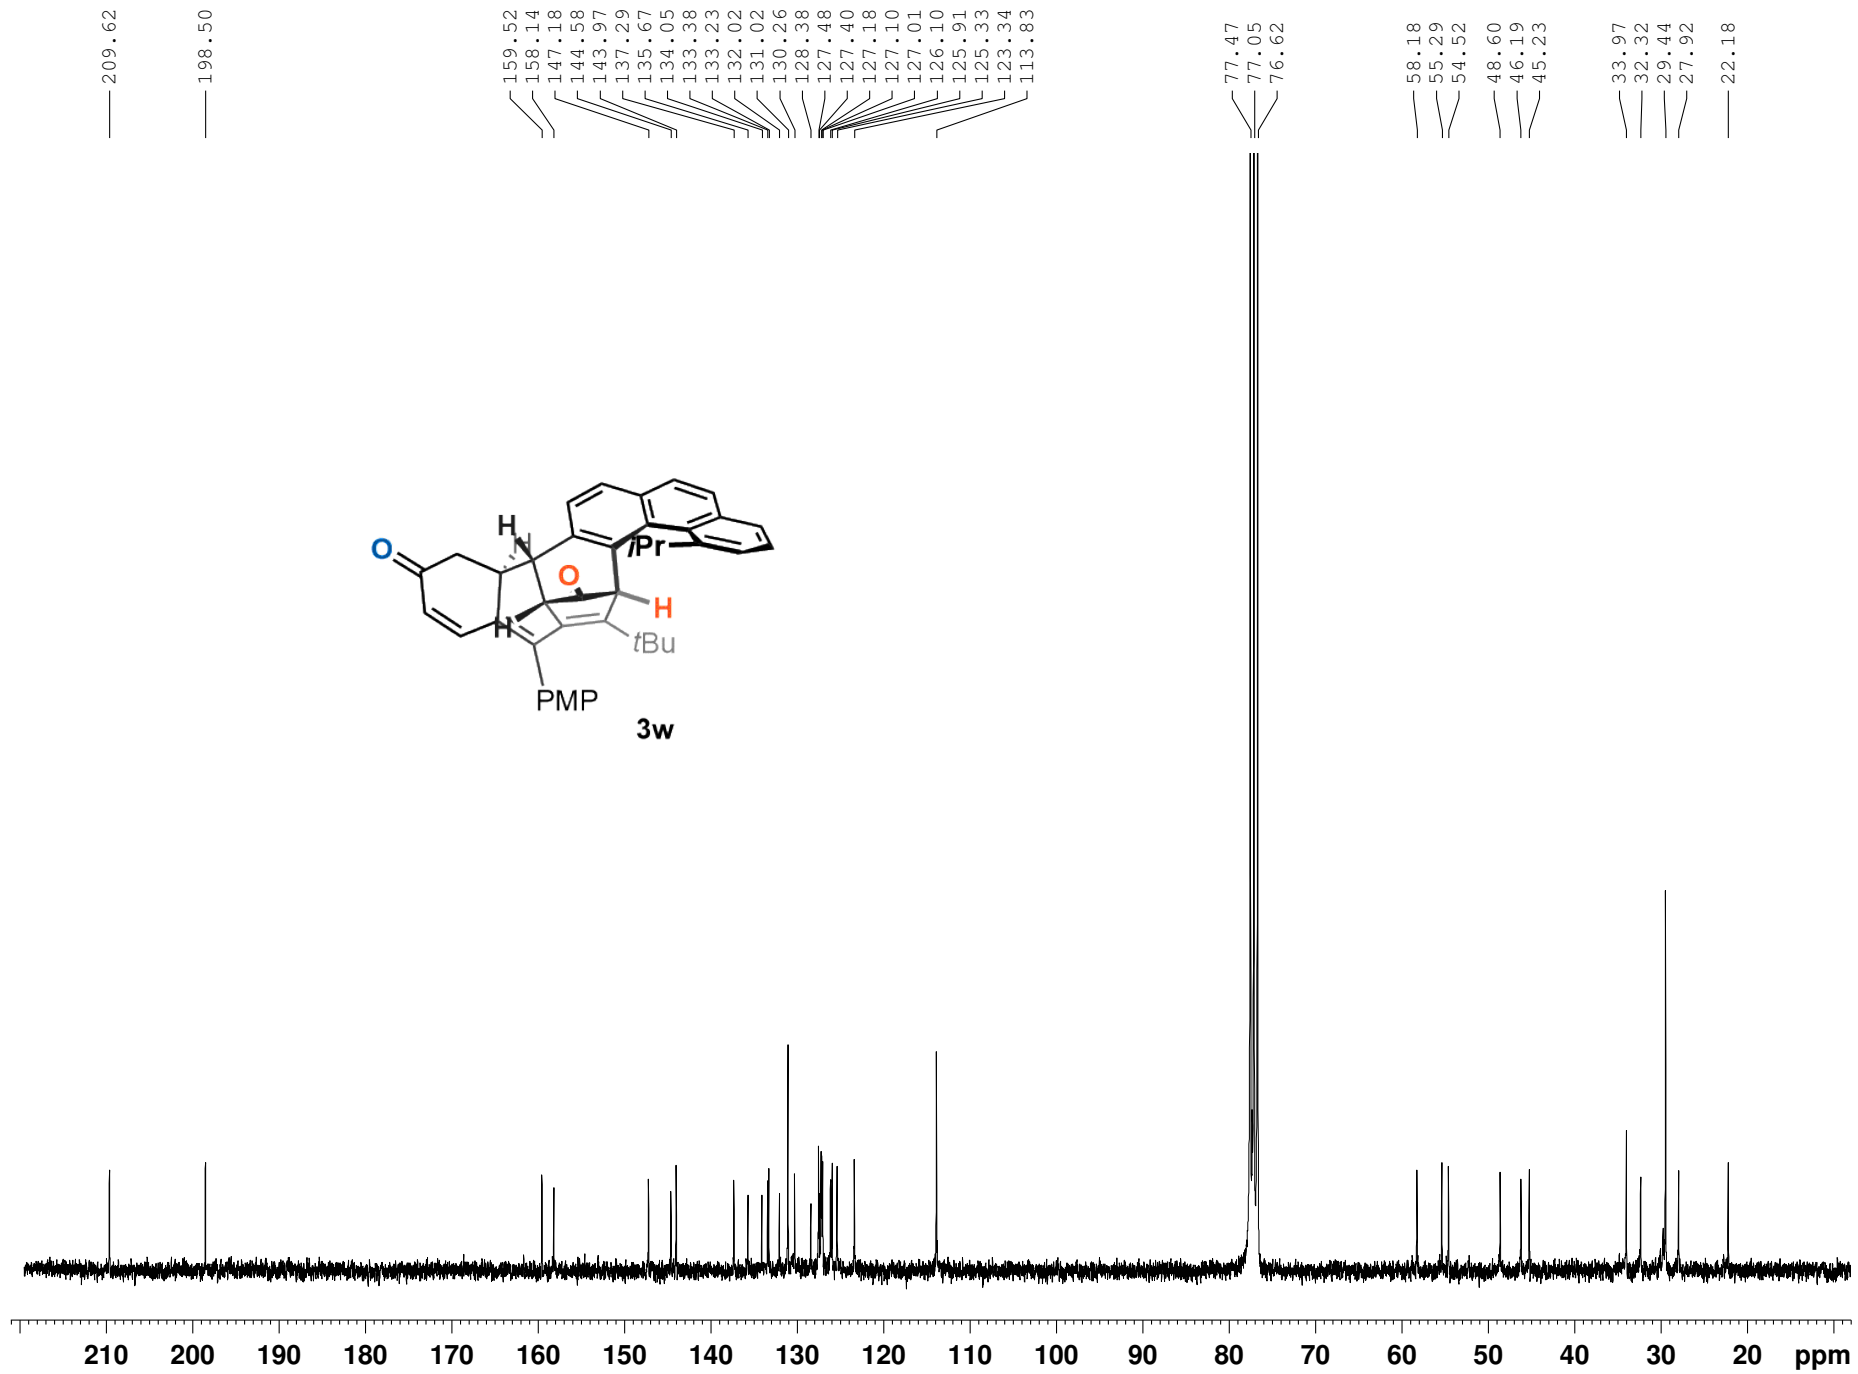

S158

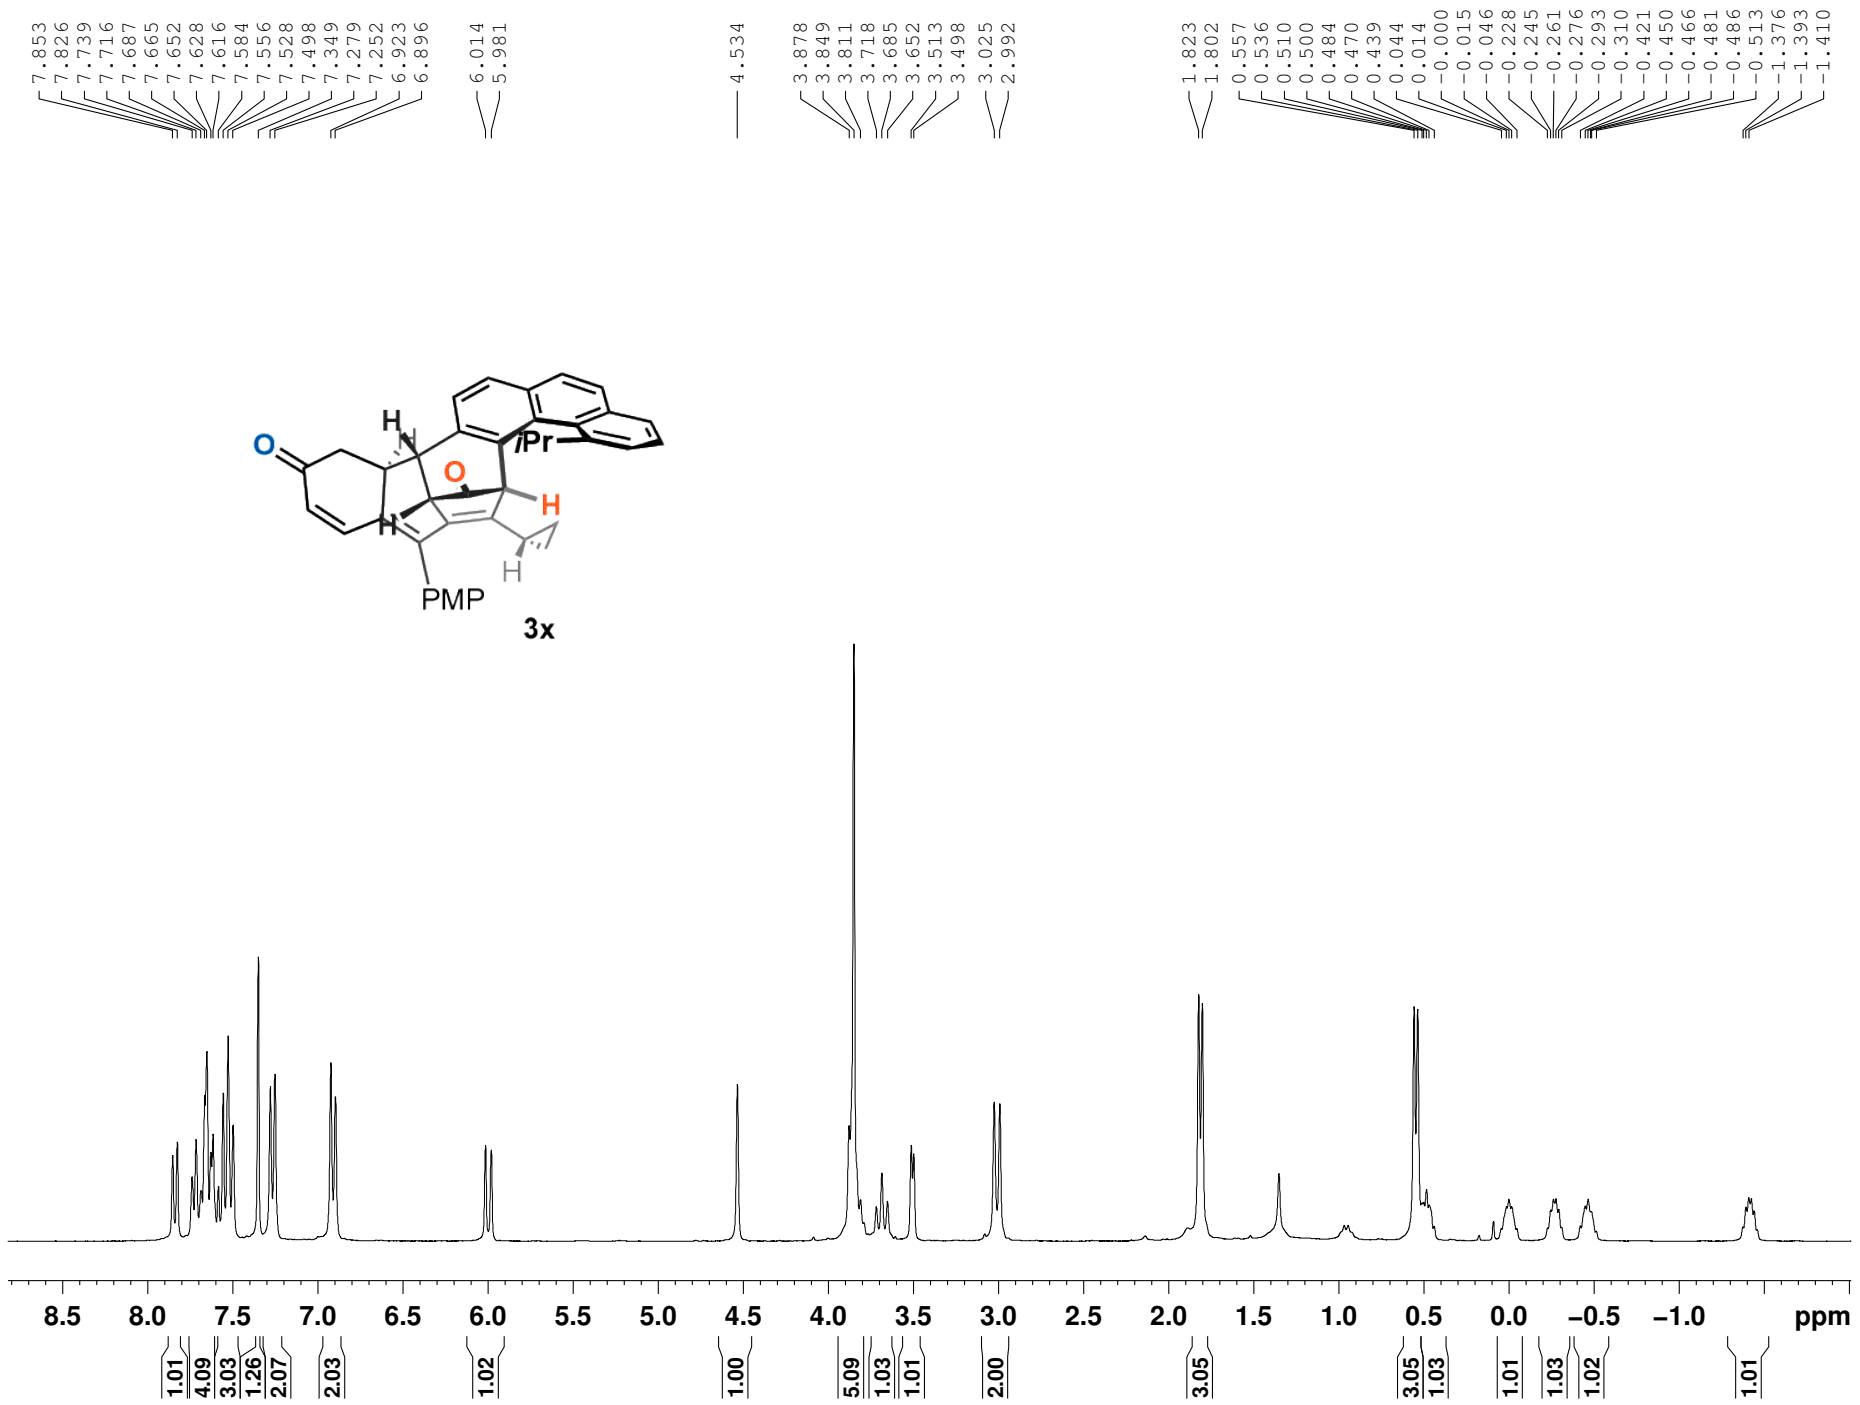



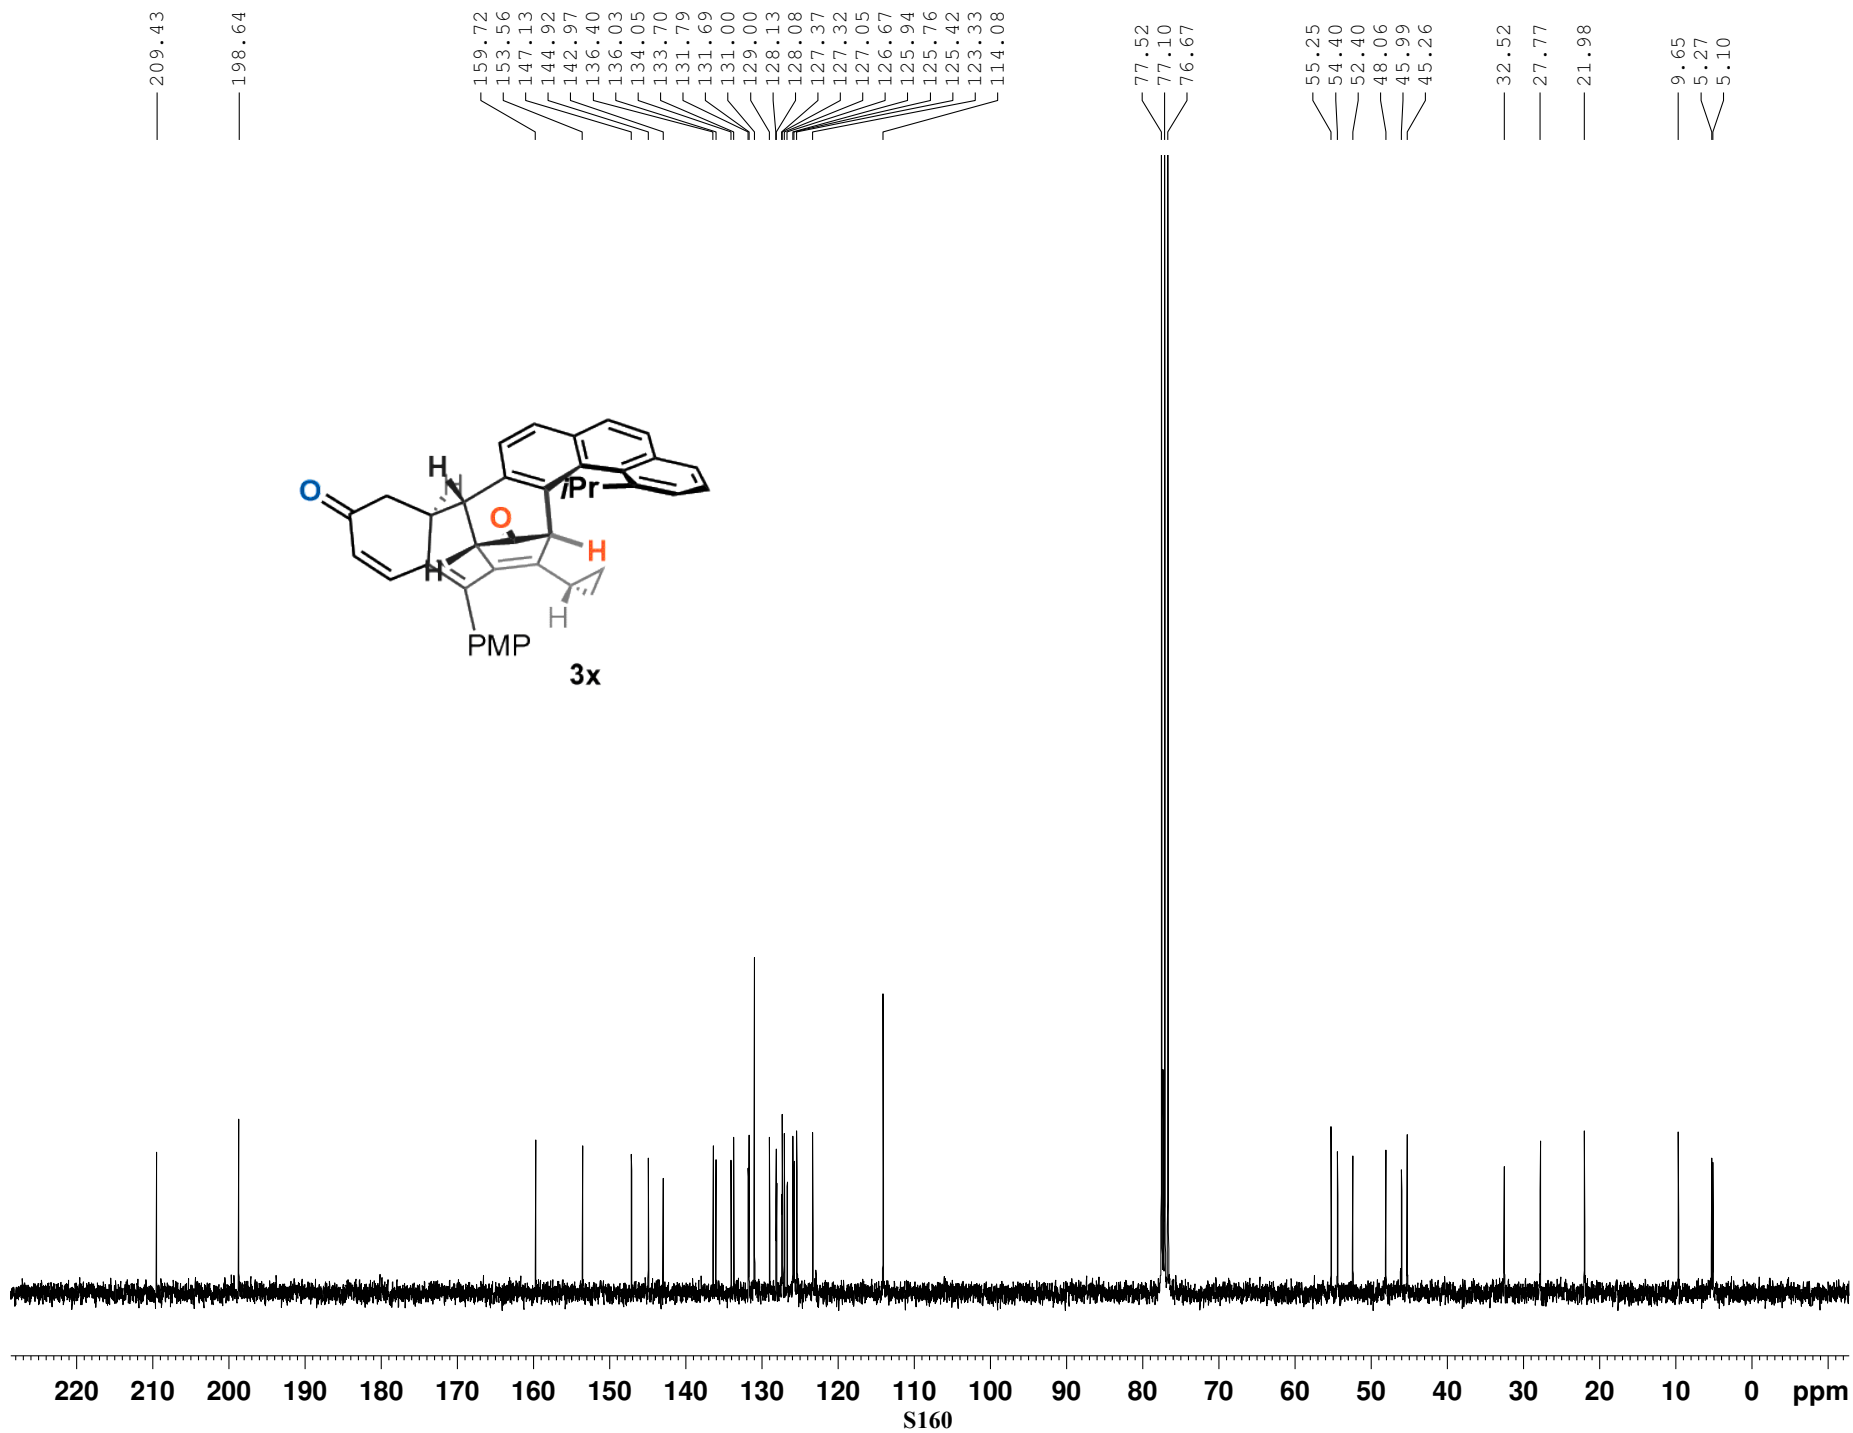

7.581  
7.554  
7.440  
7.416  
7.394  
7.368  
7.343  
7.308  
7.274  
7.249  
7.233  
7.221  
7.206  
7.088  
6.927  
6.899  
6.650  
6.622

5.739  
5.705

4.647

3.671  
3.650  
3.627  
3.607  
3.589  
3.384  
3.351  
3.318  
3.244  
3.229  
2.745  
2.712

1.619  
1.589  
1.567  
1.237  
1.231  
1.213  
1.189  
0.934  
0.909  
0.885  
0.862  
0.837  
0.505  
0.445  
0.419  
0.398  
0.374  
0.349  
0.318  
0.297  
0.243  
0.218  
0.193  
0.171  
0.149  
0.124

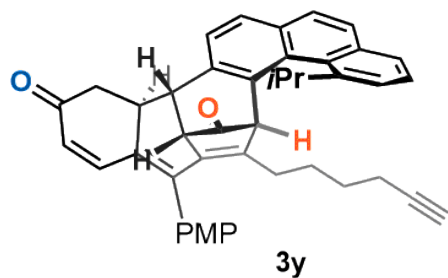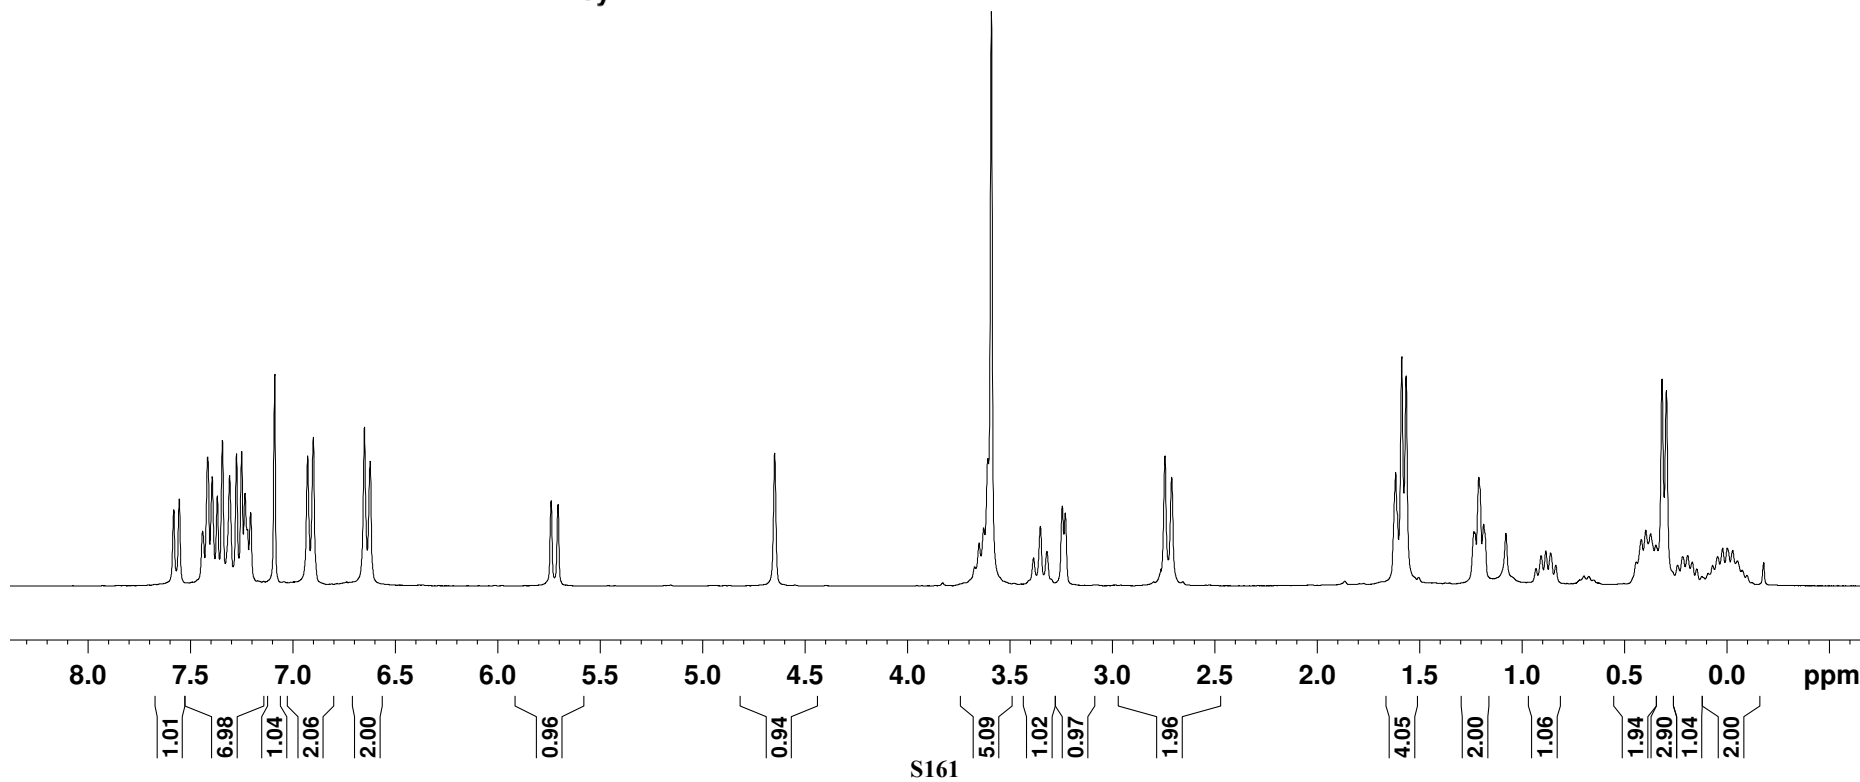

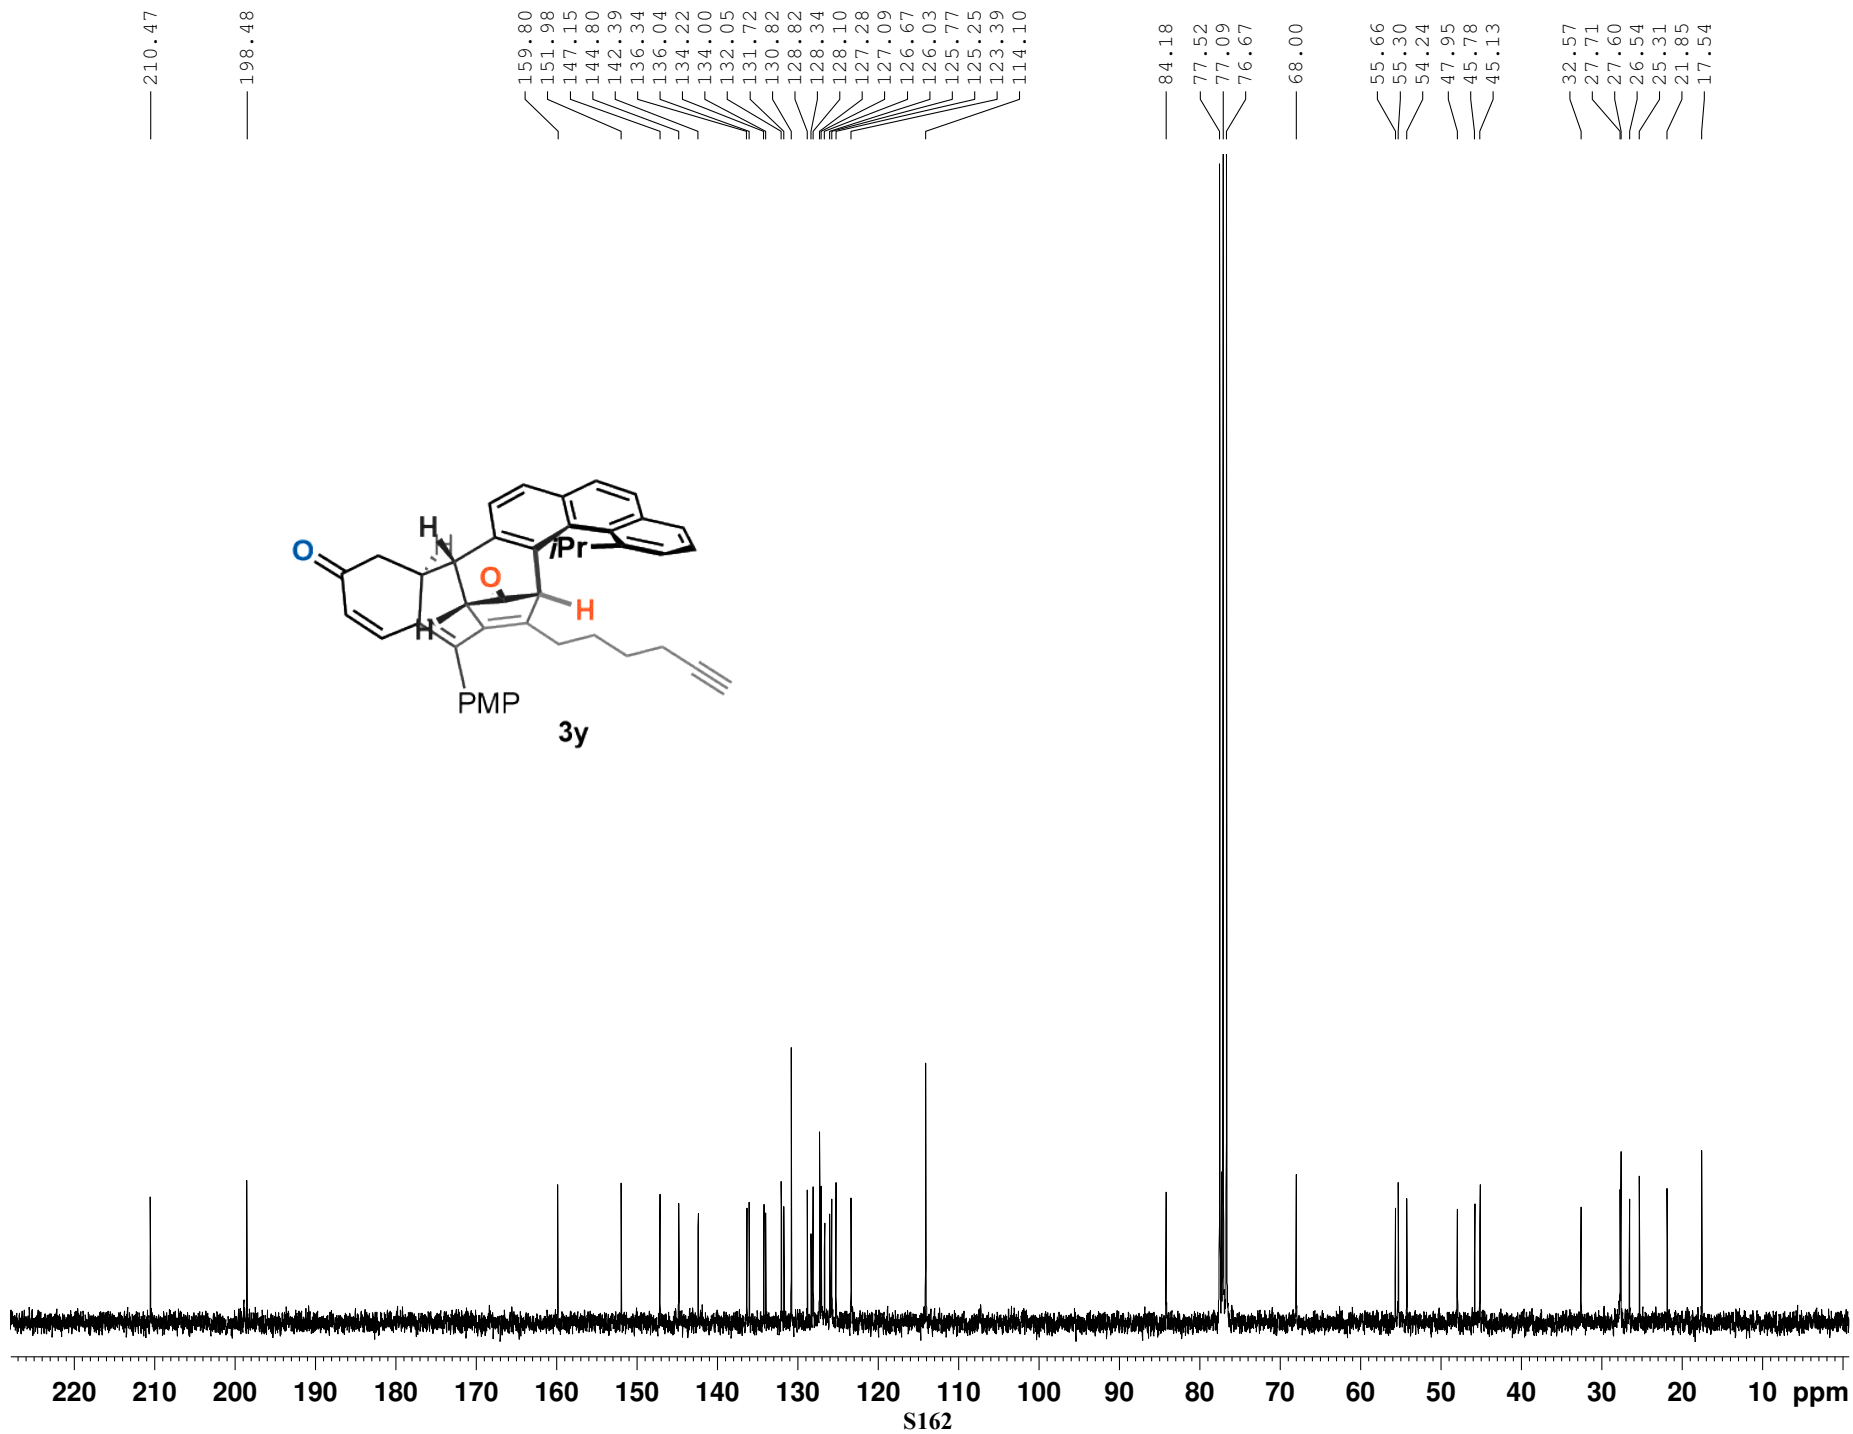

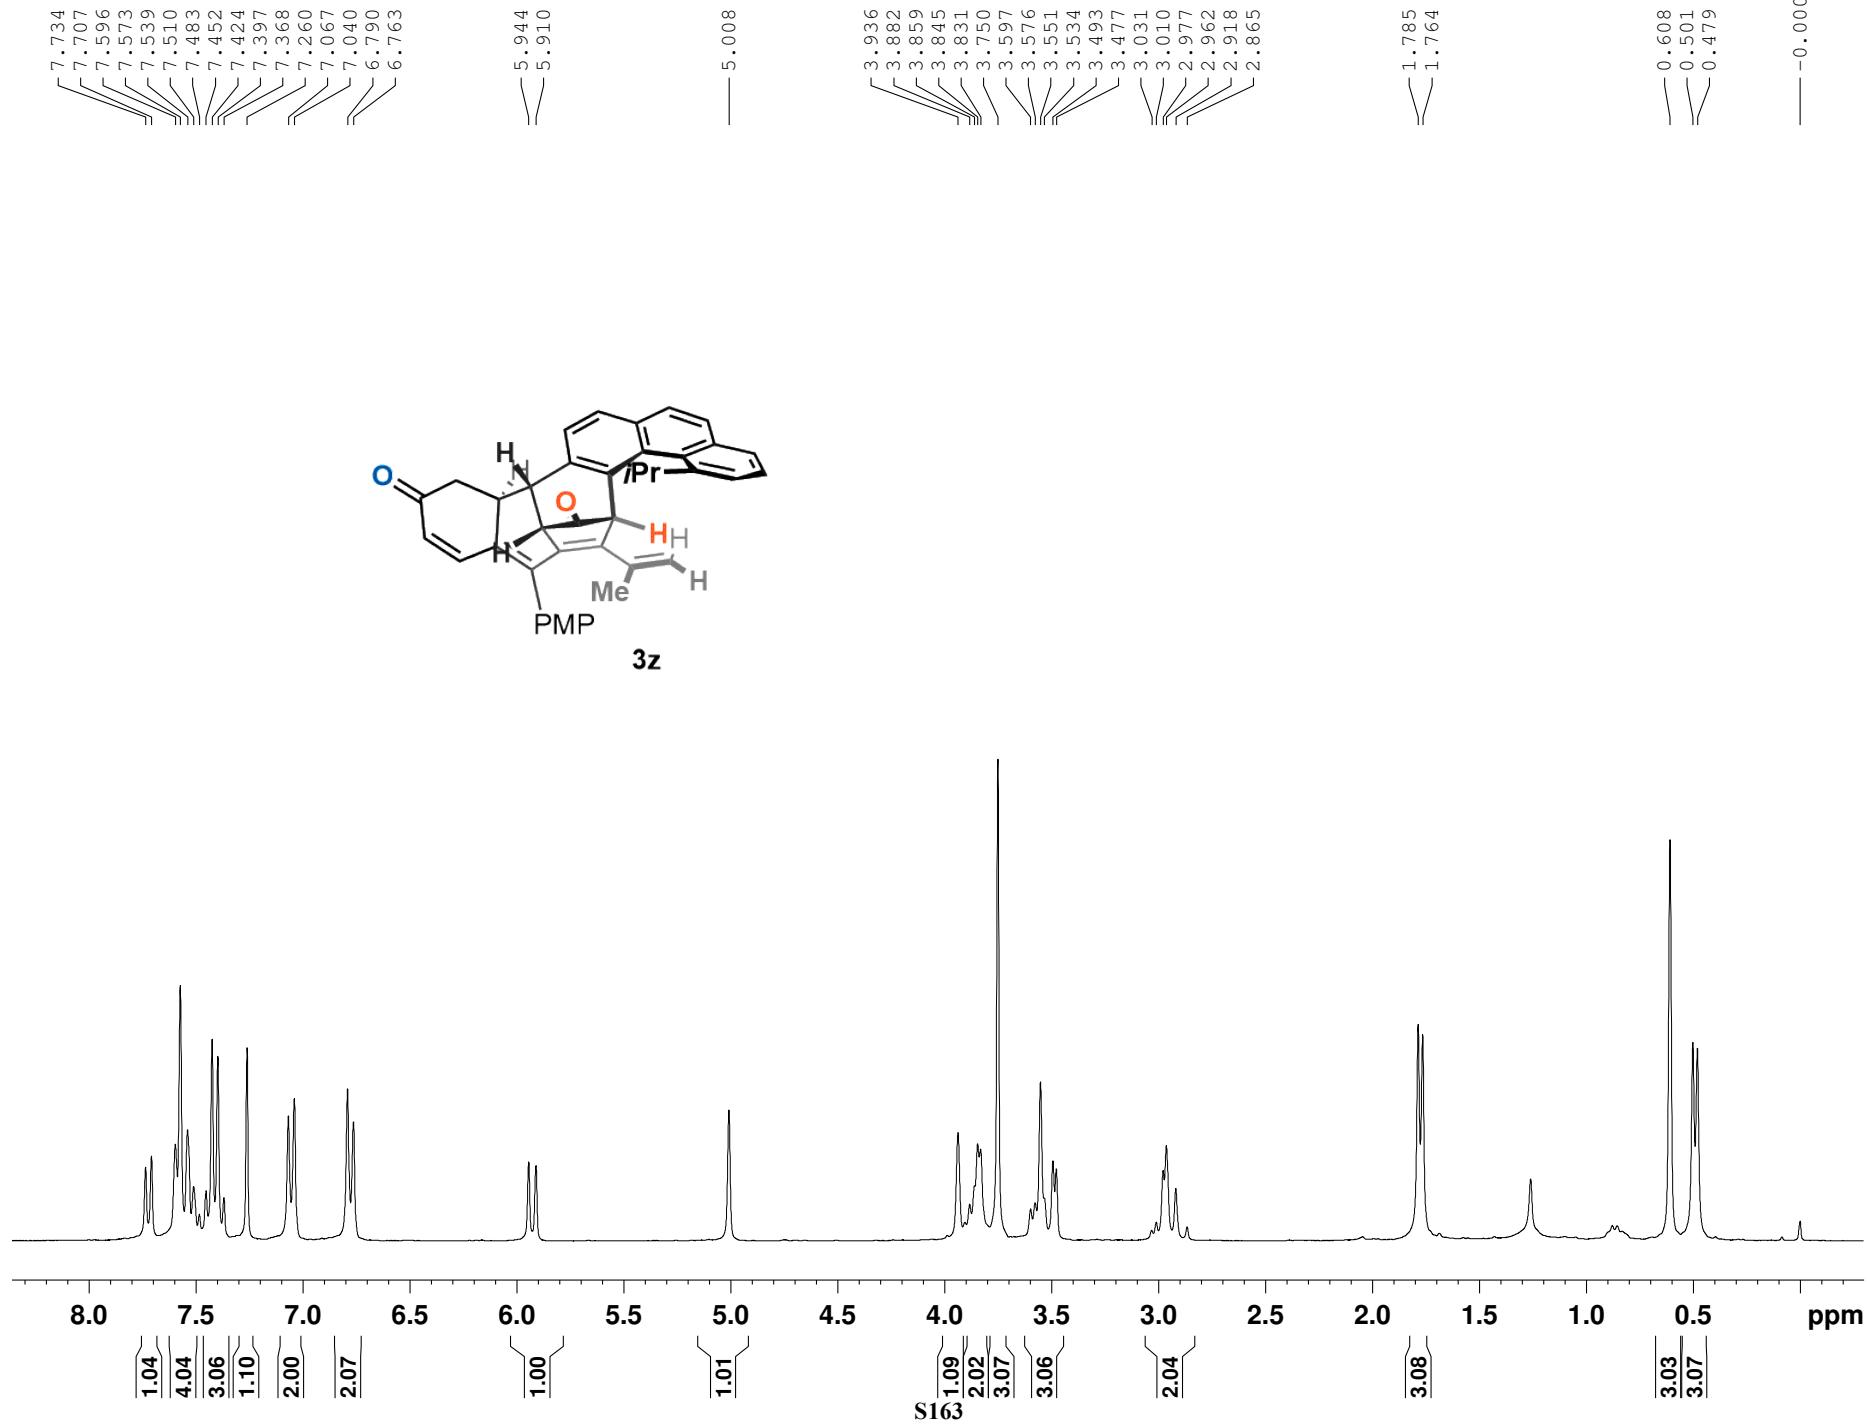

— 209.93

— 198.40

159.50  
149.28  
146.96  
144.37  
143.35  
136.19  
136.01  
134.06  
133.89  
133.00  
131.79  
131.11  
129.12  
128.27  
127.47  
127.41  
127.14  
127.05  
126.96  
126.14  
125.74  
125.24  
123.25  
117.67  
113.70

77.52  
77.09  
76.67

56.64  
55.24  
55.17  
48.52  
45.87  
45.30

32.52  
27.80  
21.92  
21.18

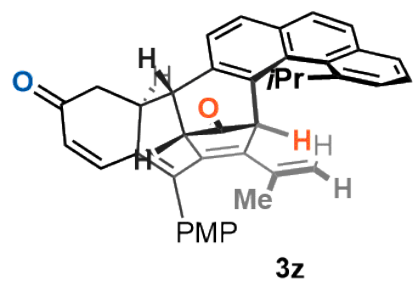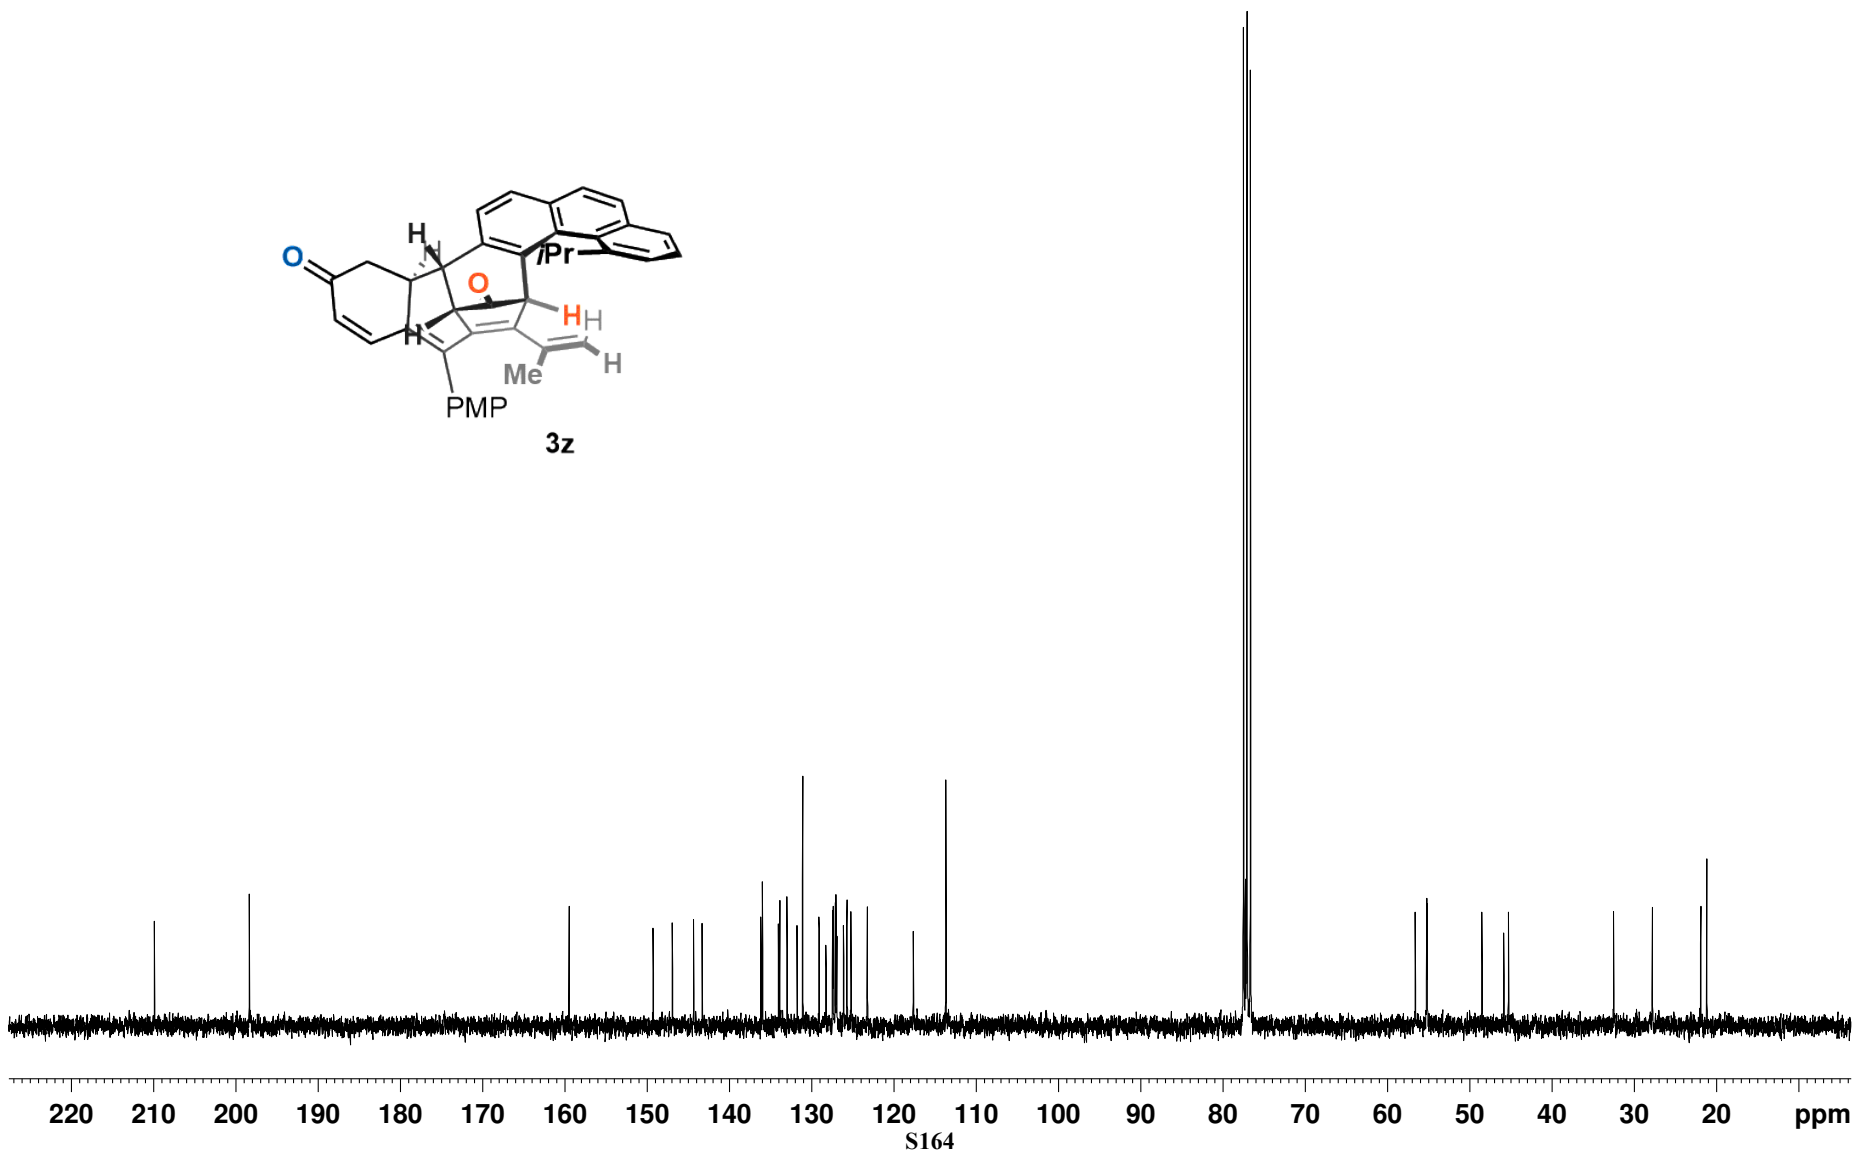

7.757  
7.730  
7.600  
7.576  
7.532  
7.515  
7.484  
7.457  
7.415  
7.402  
7.387  
7.375  
7.260  
7.107  
7.080  
6.827  
6.800

5.936  
5.902

5.016

3.864  
3.843  
3.817  
3.803  
3.761  
3.576  
3.542  
3.511  
3.476  
3.461

2.934  
2.904  
2.861

2.361  
2.318

2.046

1.771  
1.750

0.494  
0.473

-0.000

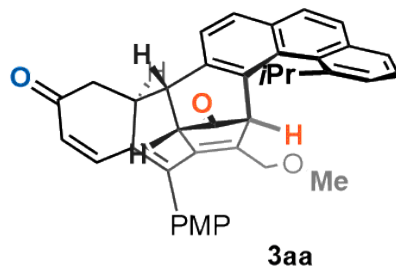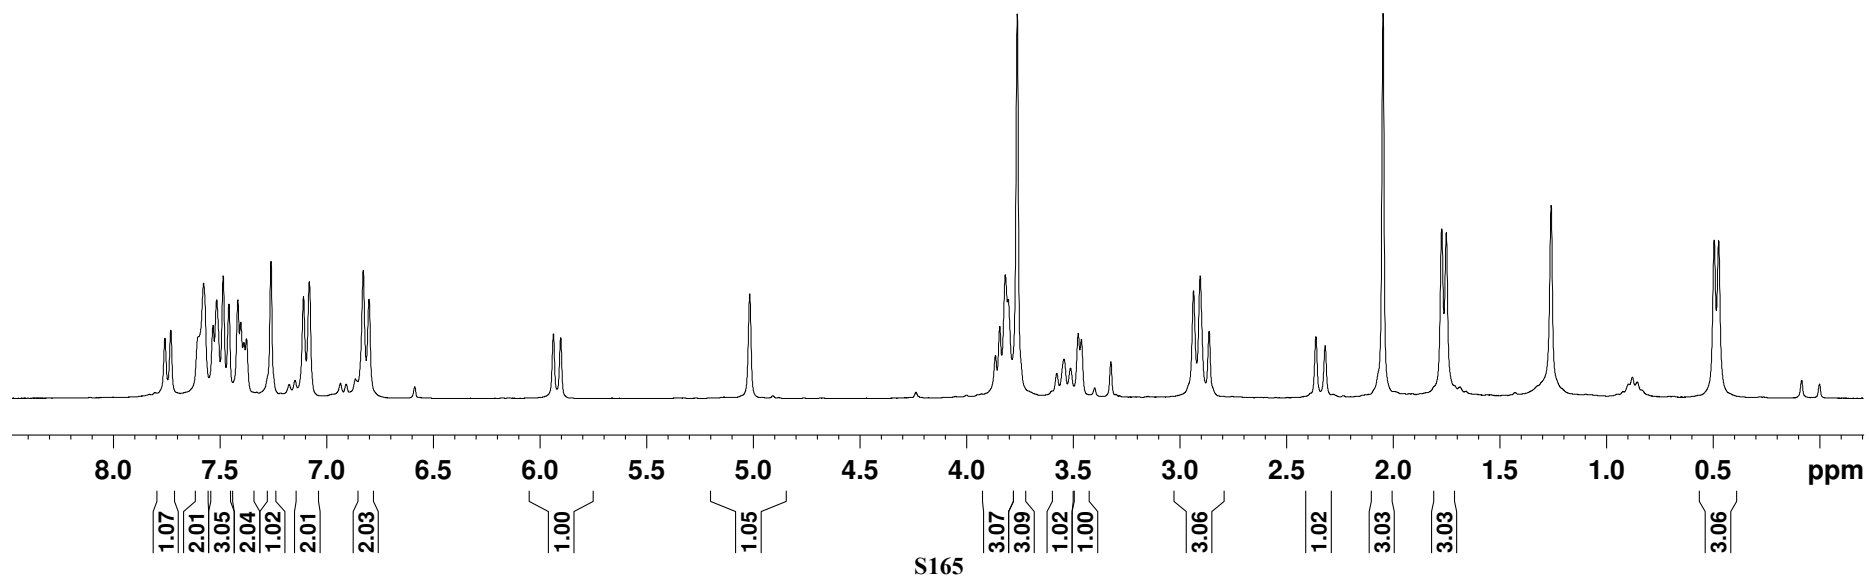

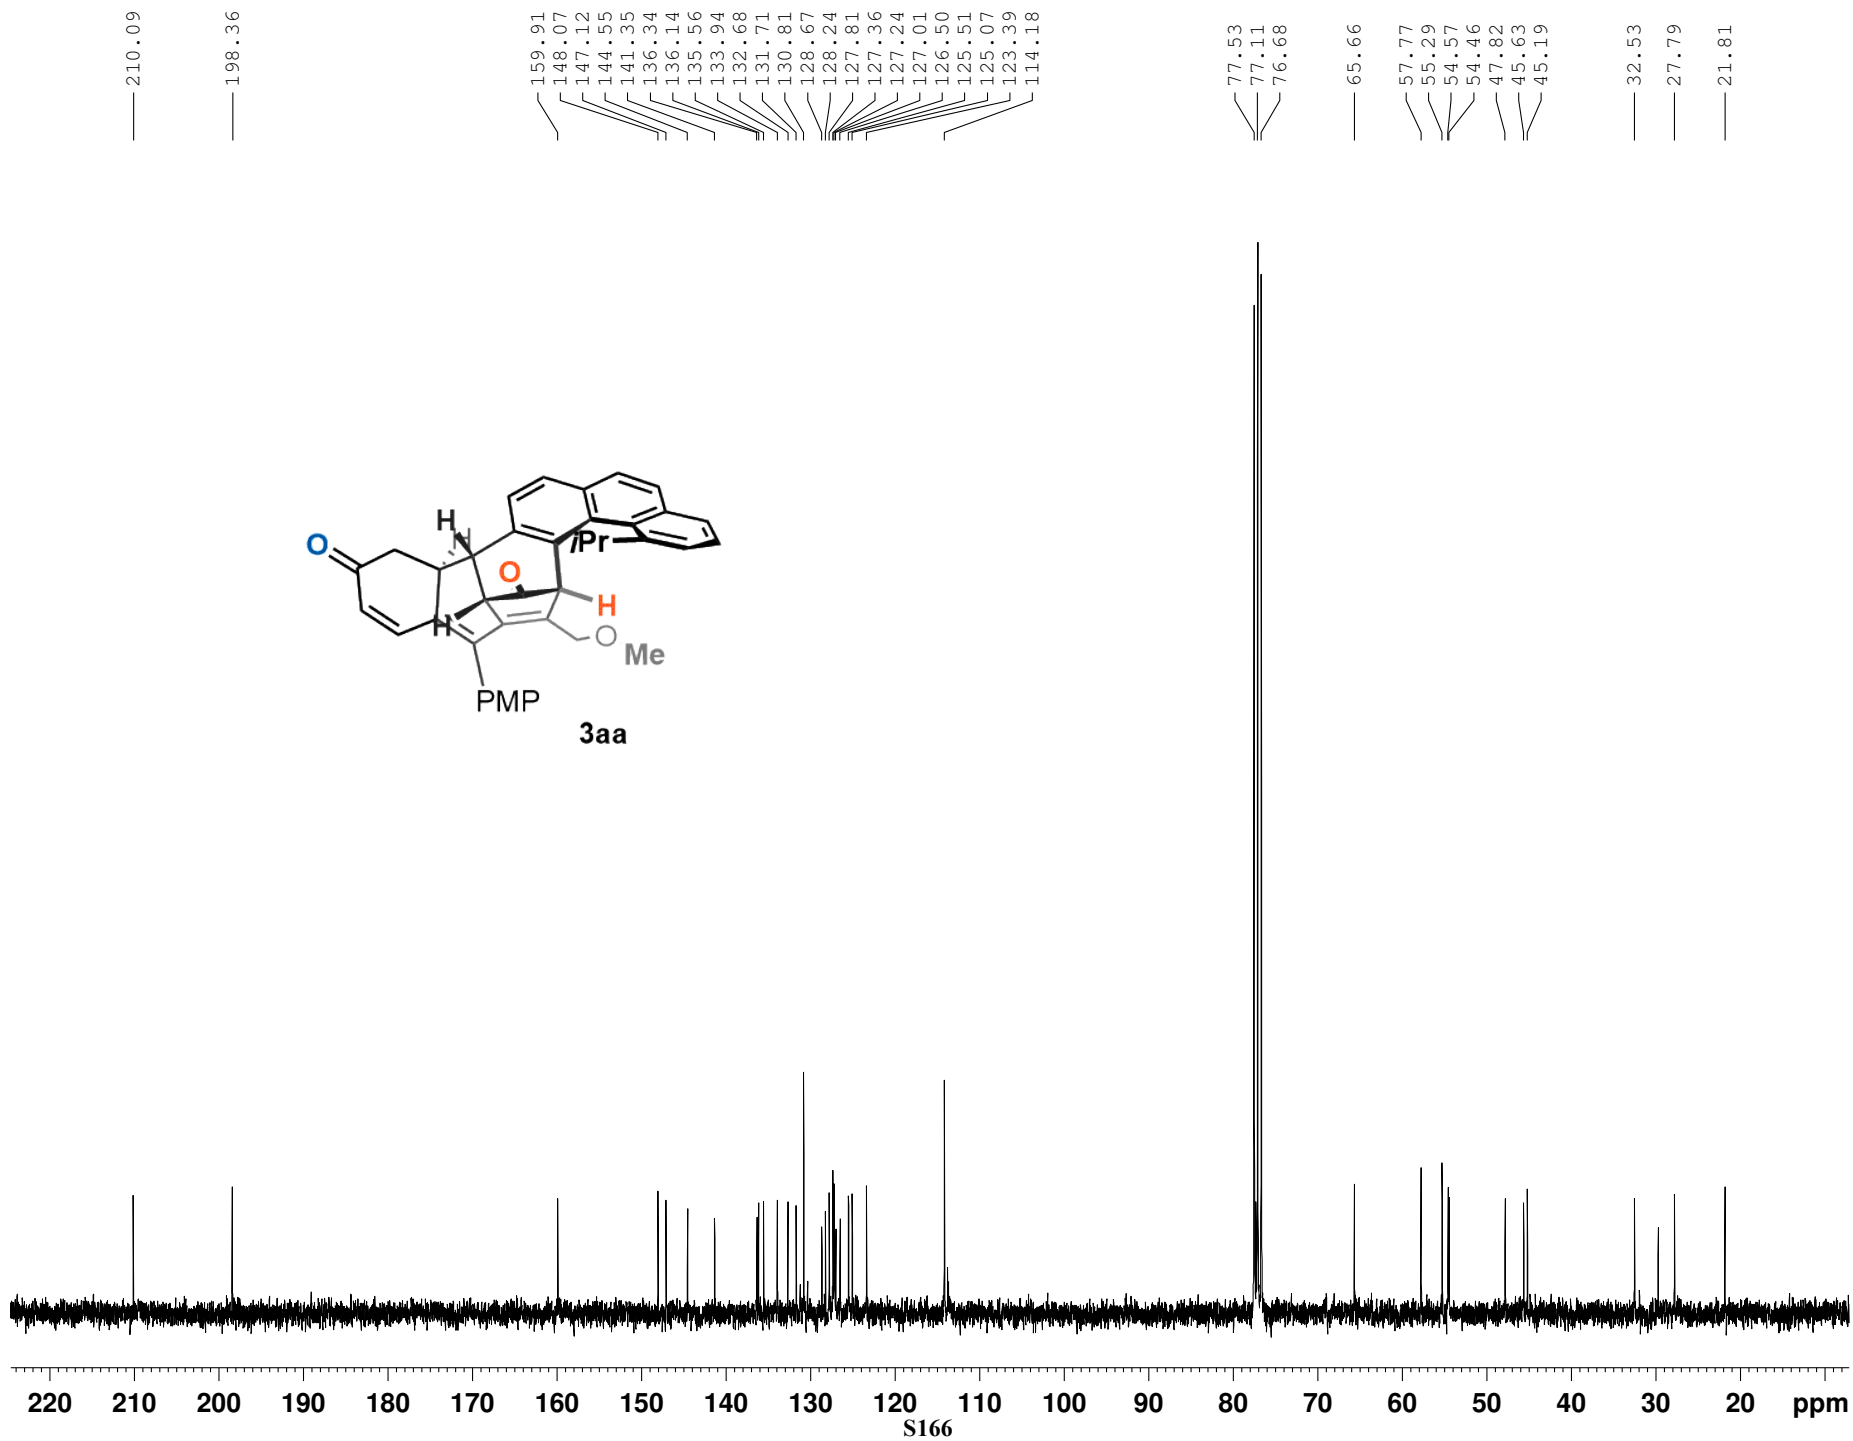

7.862  
7.835  
7.757  
7.733  
7.667  
7.637  
7.612  
7.585  
7.547  
7.526  
7.360  
7.284  
7.258  
6.929  
6.903

6.031  
5.997

4.467  
3.908  
3.885  
3.857  
3.765  
3.733  
3.700  
3.523  
3.508  
3.482  
3.458  
3.433  
3.185  
3.161  
3.137  
3.113  
3.028  
2.995

0.954  
0.930  
0.906  
0.522  
0.493  
0.478  
0.463  
0.433  
0.044  
0.015  
-0.000  
-0.015  
-0.046  
-0.211  
-0.228  
-0.244  
-0.259  
-0.275  
-0.405  
-0.435  
-0.451  
-0.467  
-0.498  
-1.371  
-1.389  
-1.405  
-1.420  
-1.436

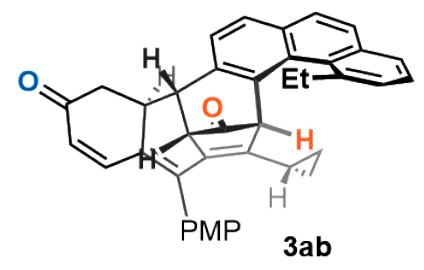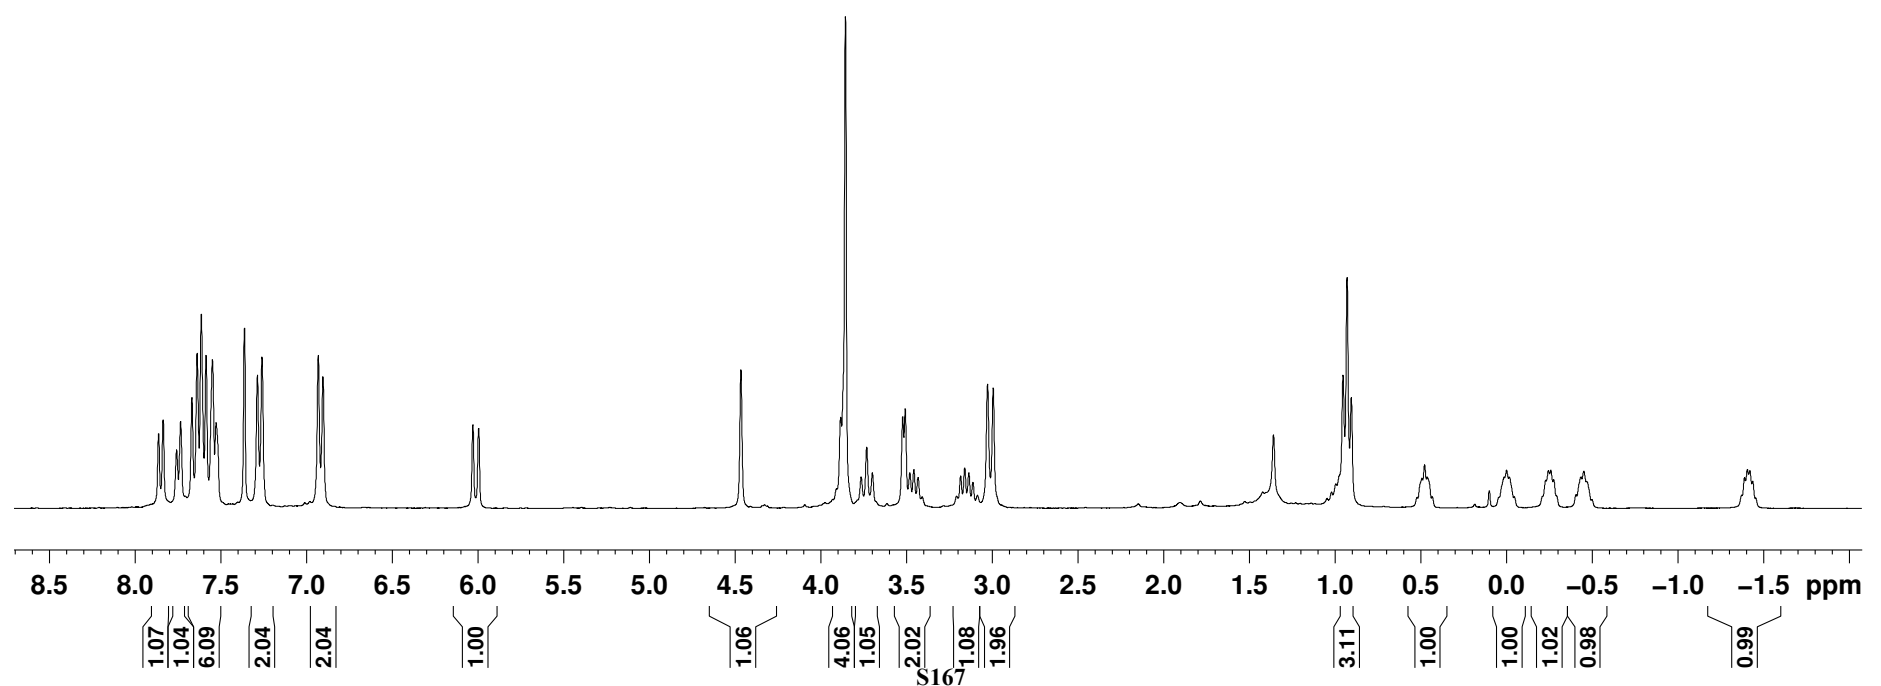



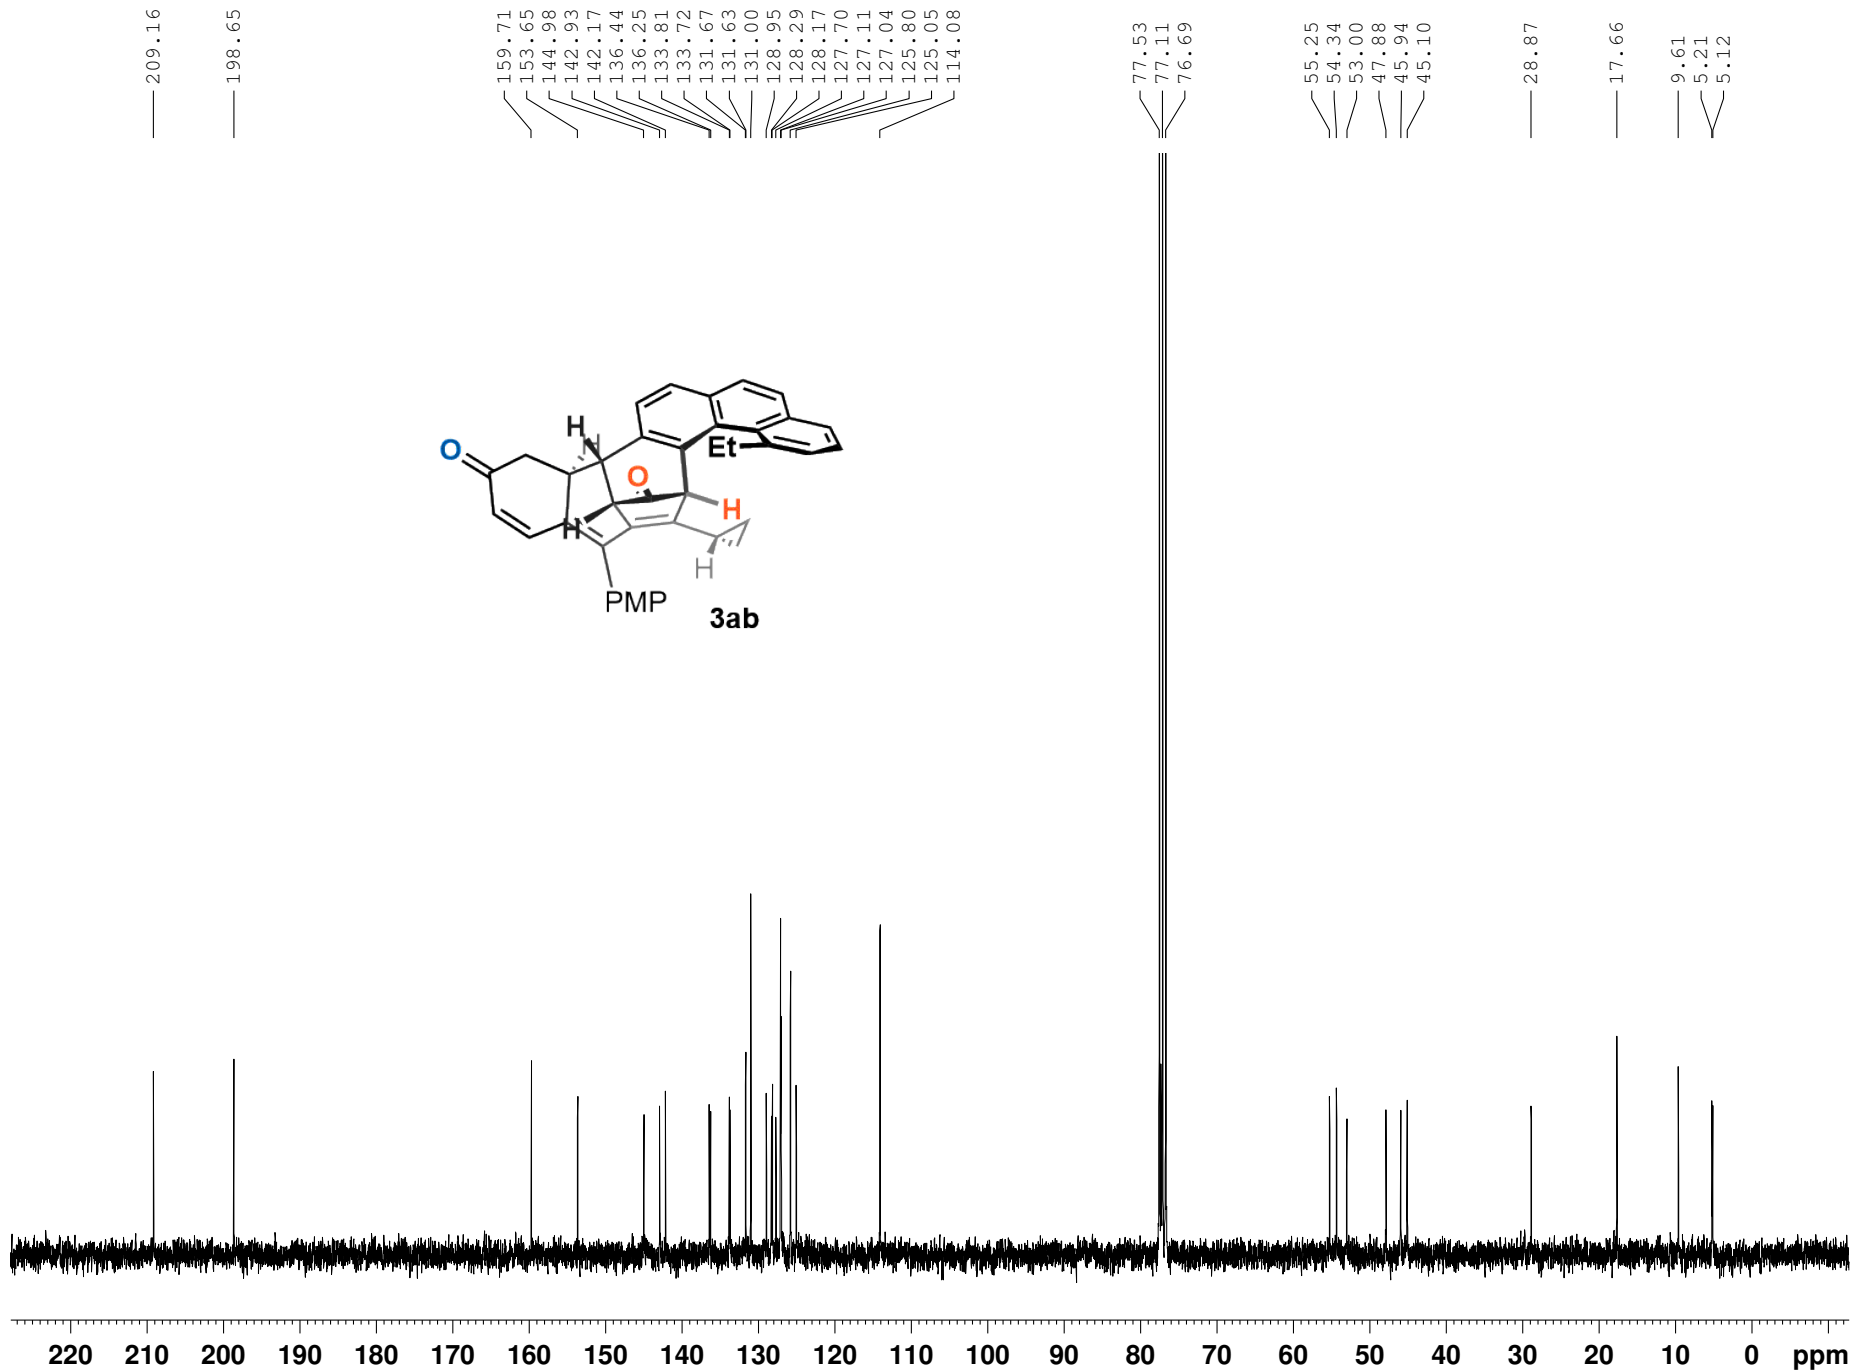

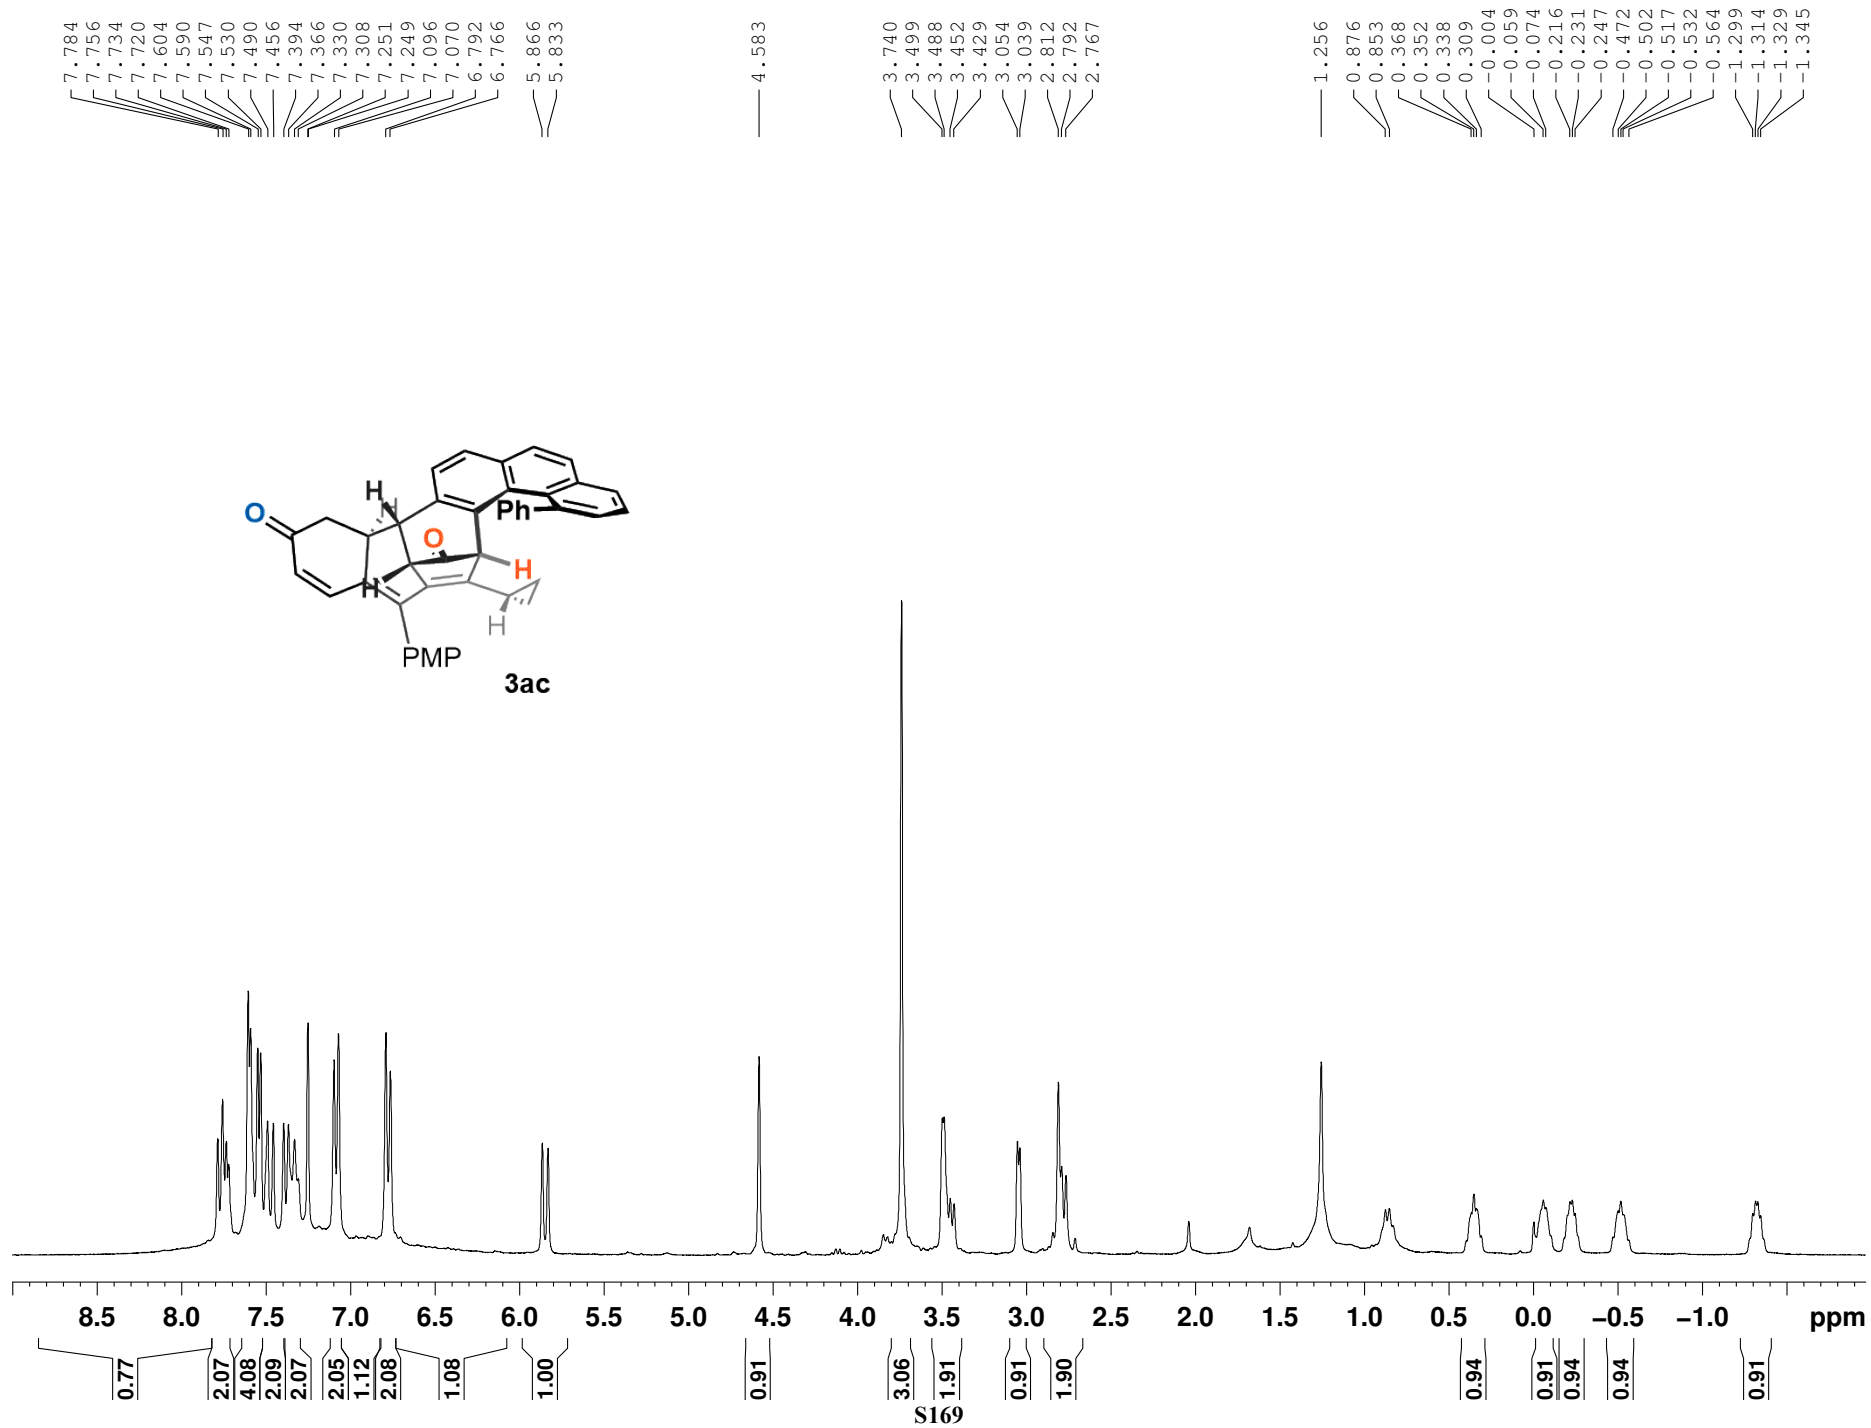

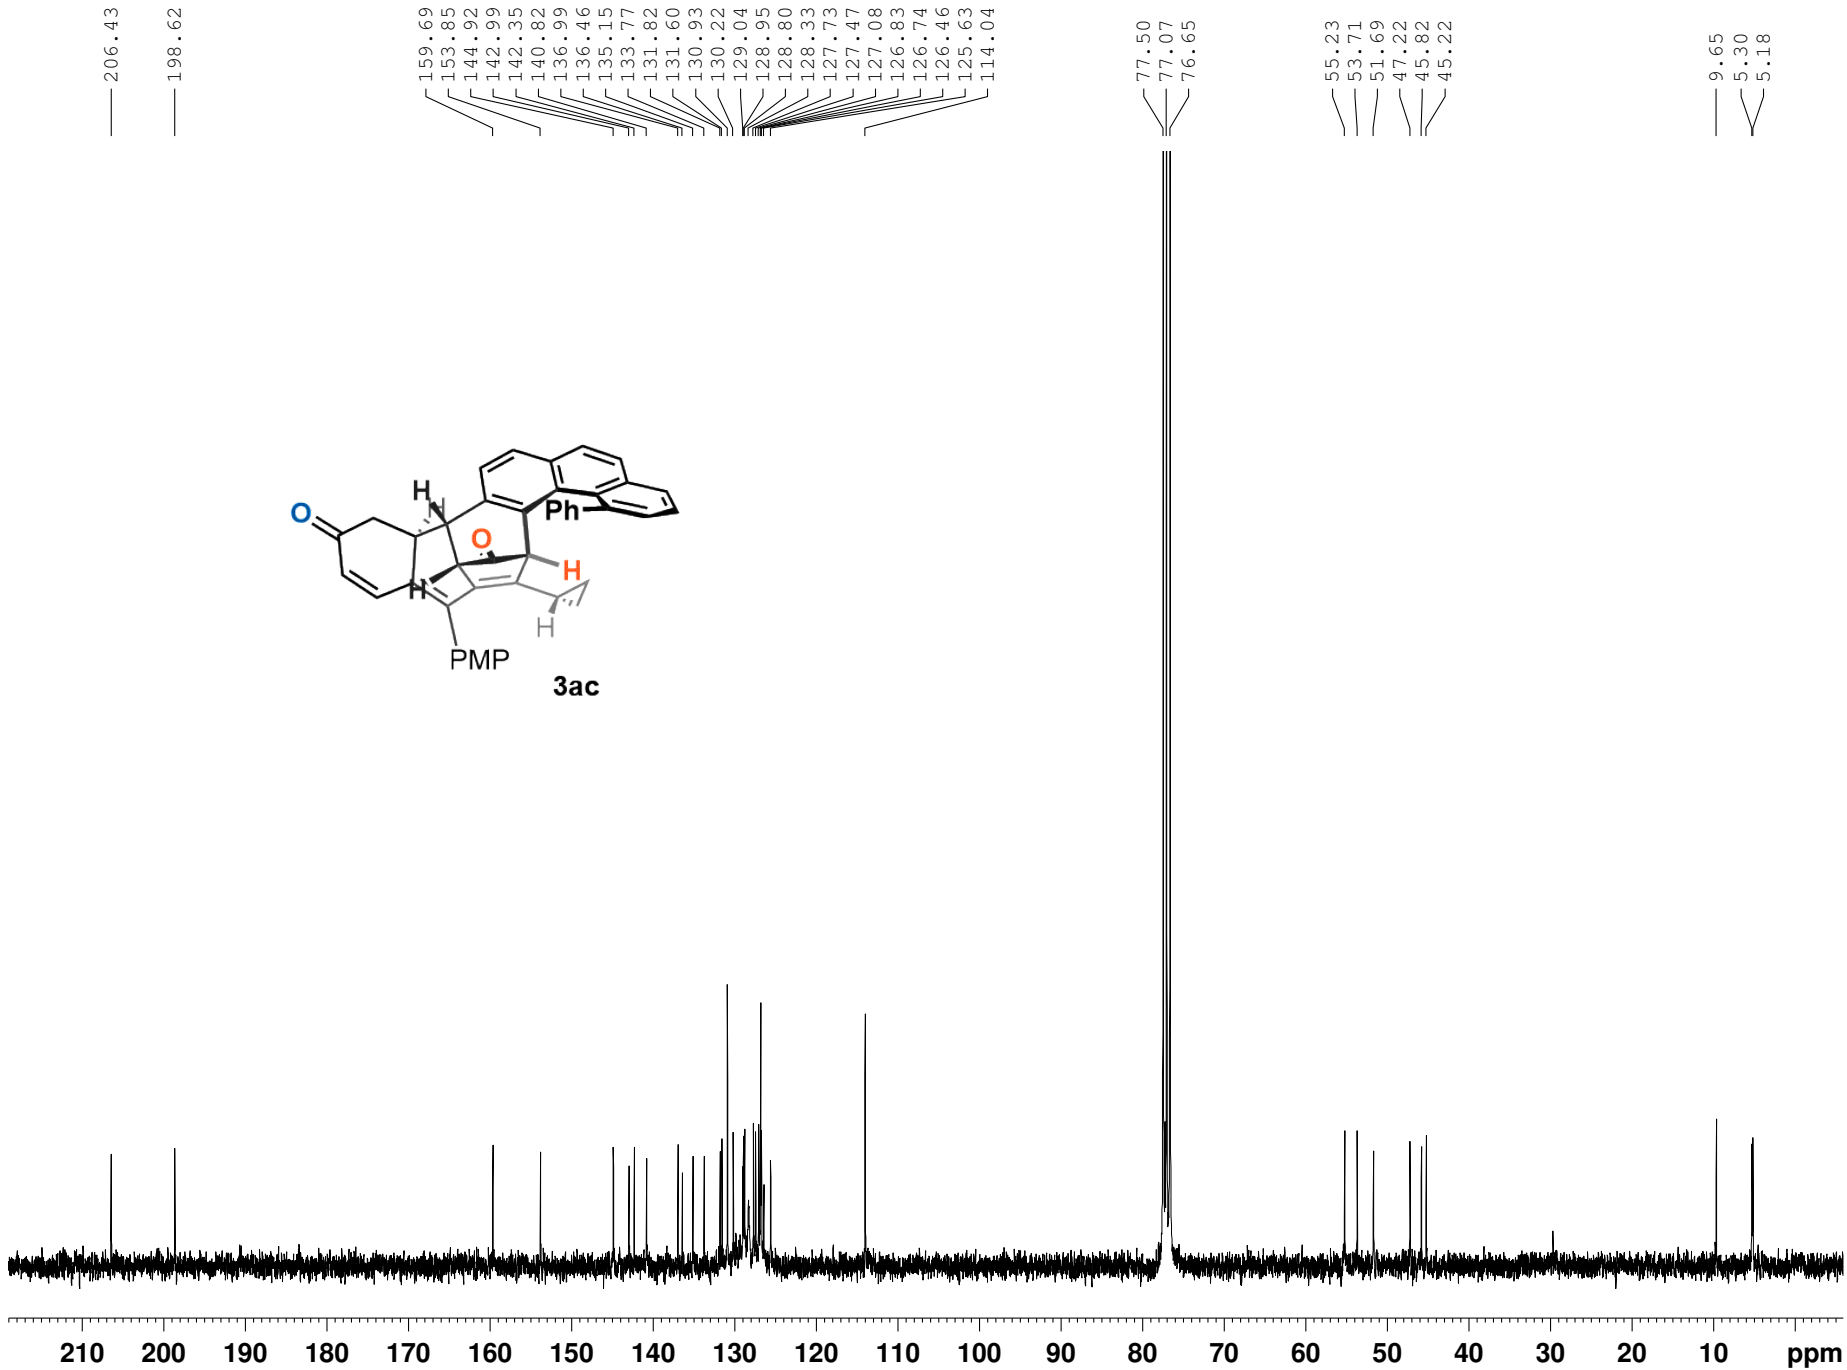

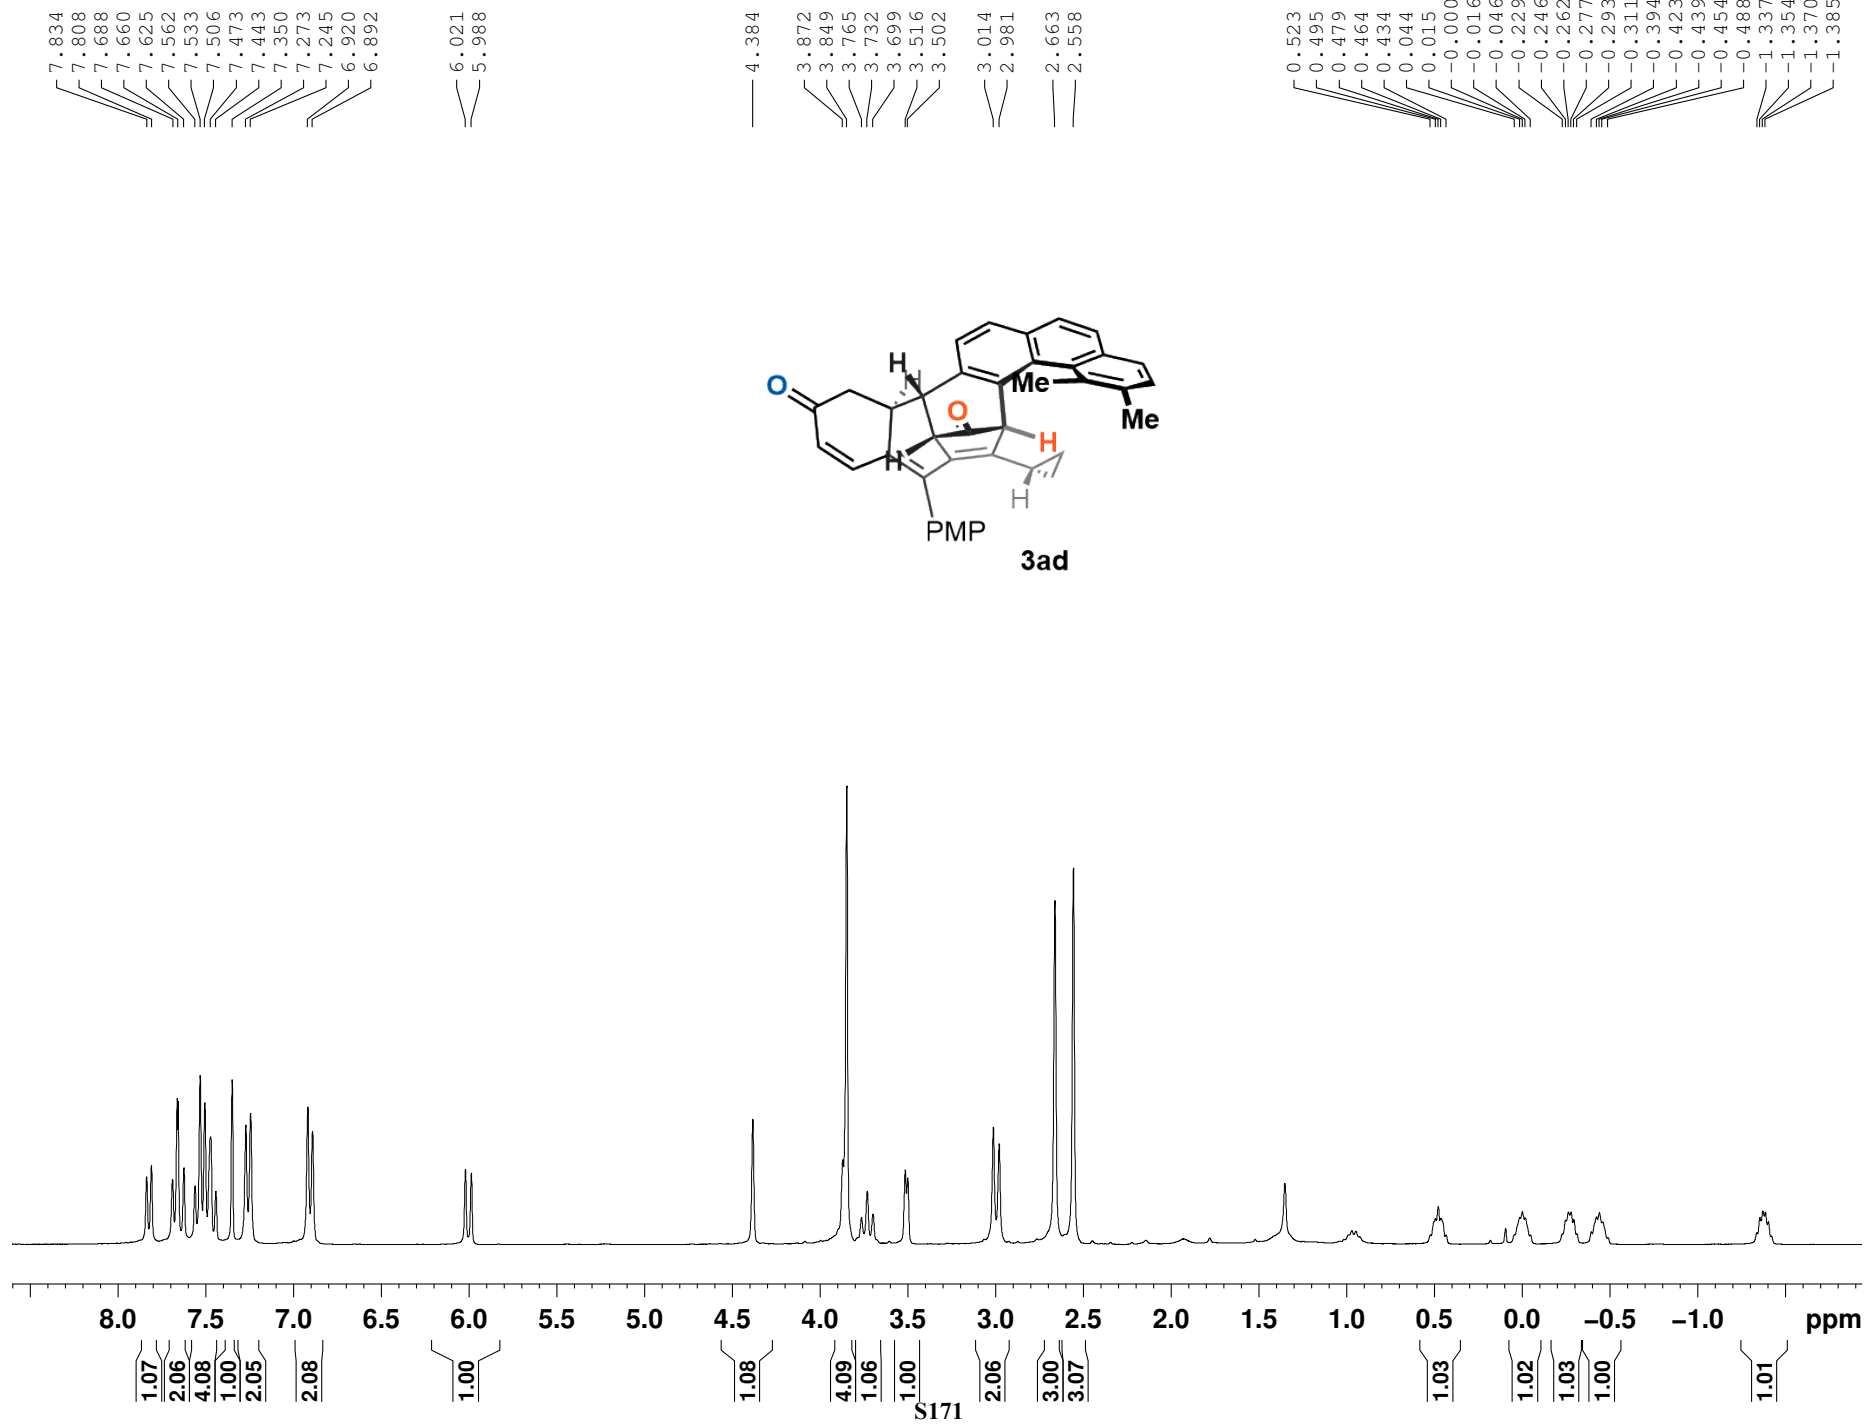

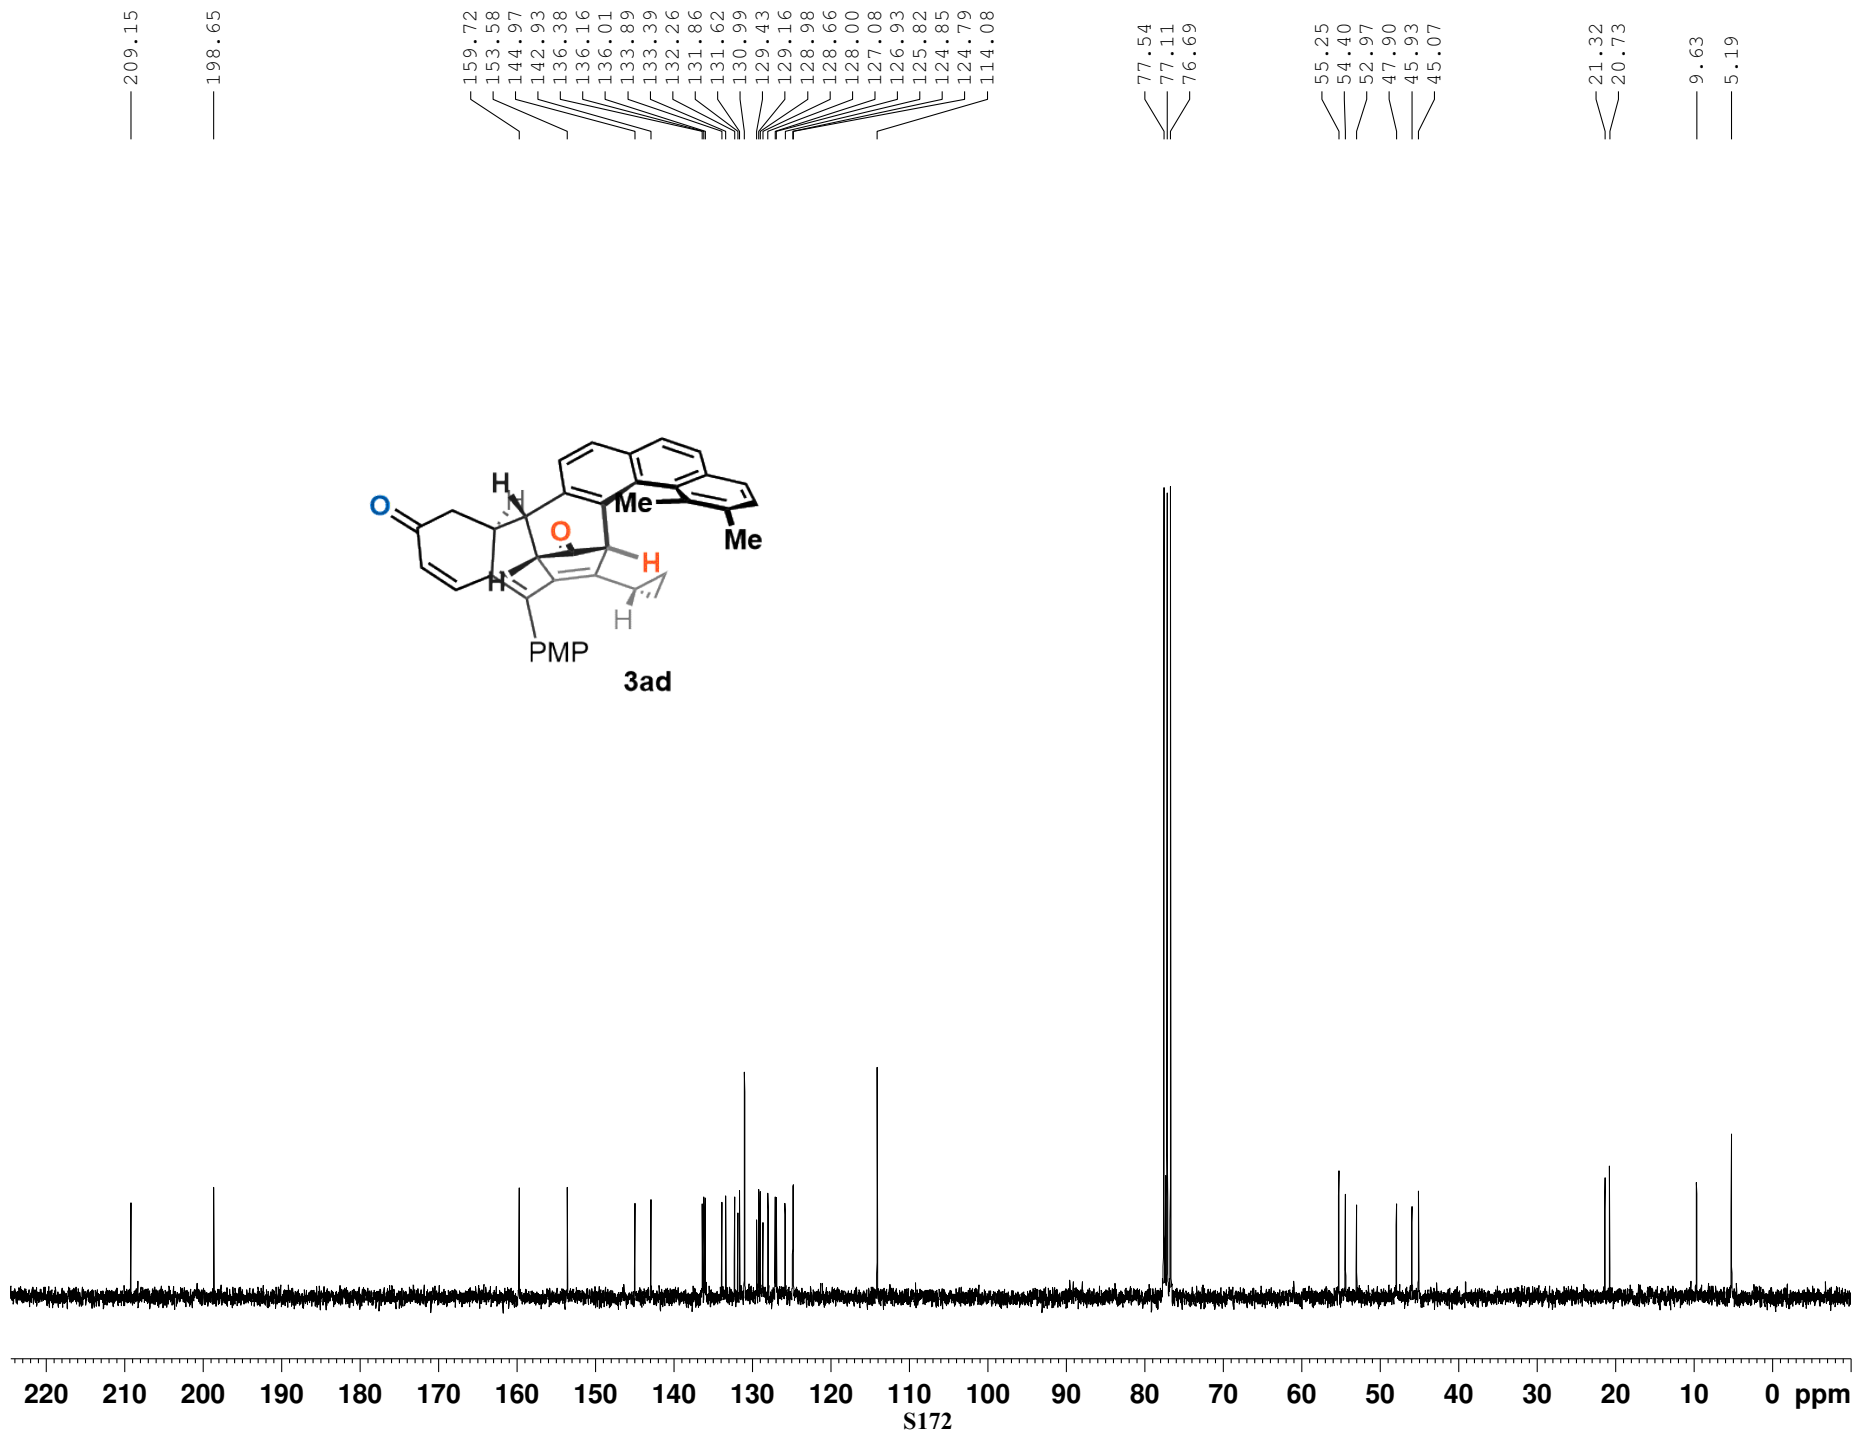

7.794  
7.767  
7.635  
7.601  
7.510  
7.488  
7.459  
7.428  
7.325  
7.307  
7.258  
7.230  
6.901  
6.874

5.996  
5.962

4.375  
3.829  
3.749  
3.716  
3.683  
3.482  
3.468  
2.983  
2.950  
2.724  
2.572

0.517  
0.488  
0.472  
0.457  
0.427  
0.045  
0.014  
-0.000  
-0.017  
-0.047  
-0.167  
-0.185  
-0.201  
-0.216  
-0.233  
-0.251  
-0.391  
-0.421  
-0.438  
-0.458  
-0.486  
-1.273  
-1.290  
-1.307  
-1.322  
-1.339  
-1.357

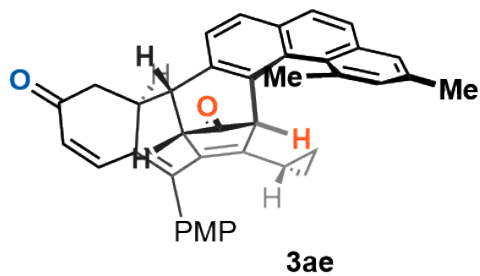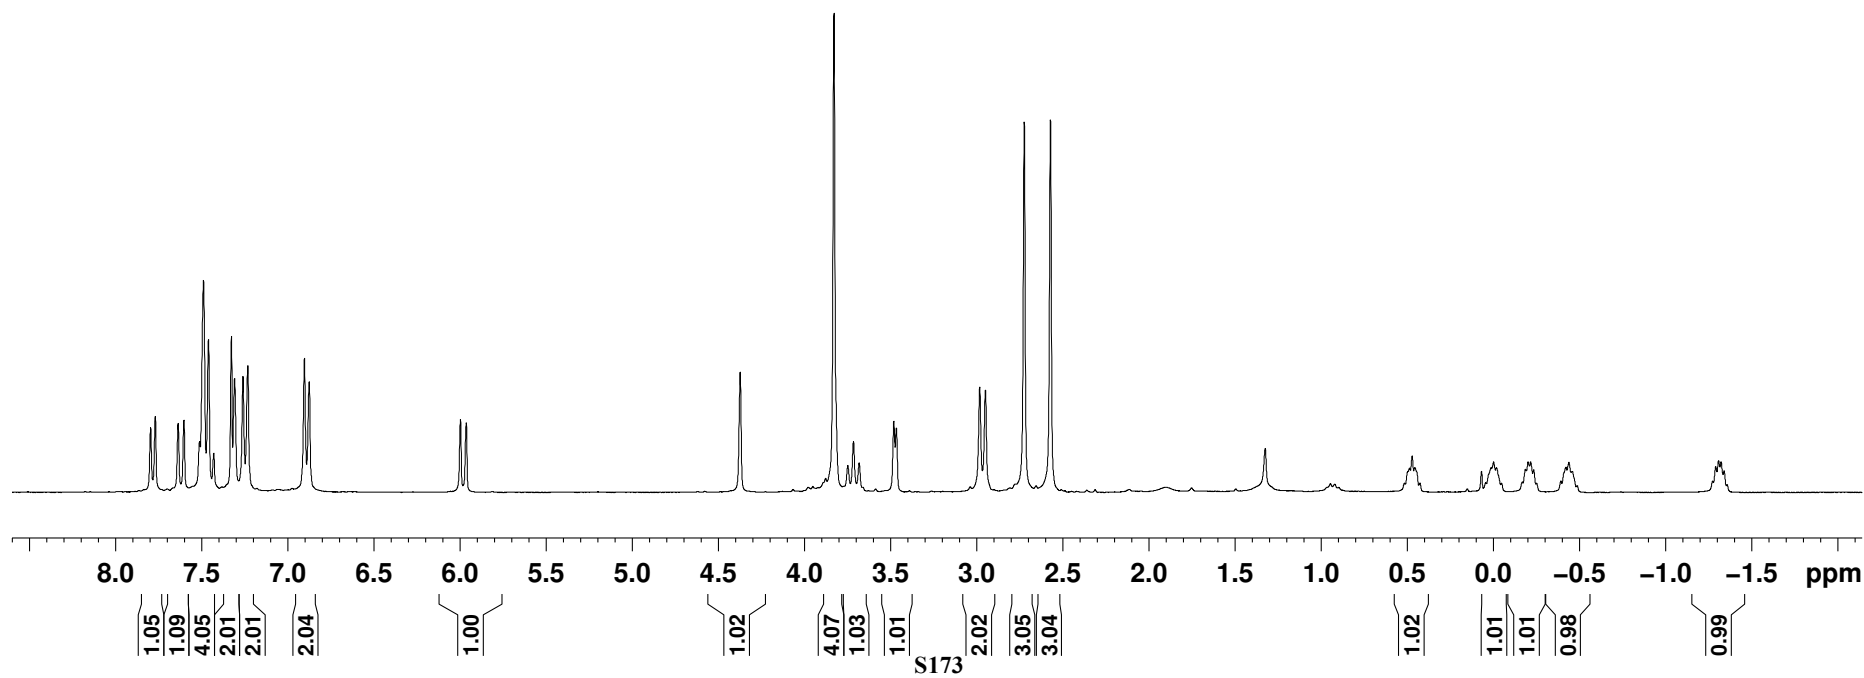

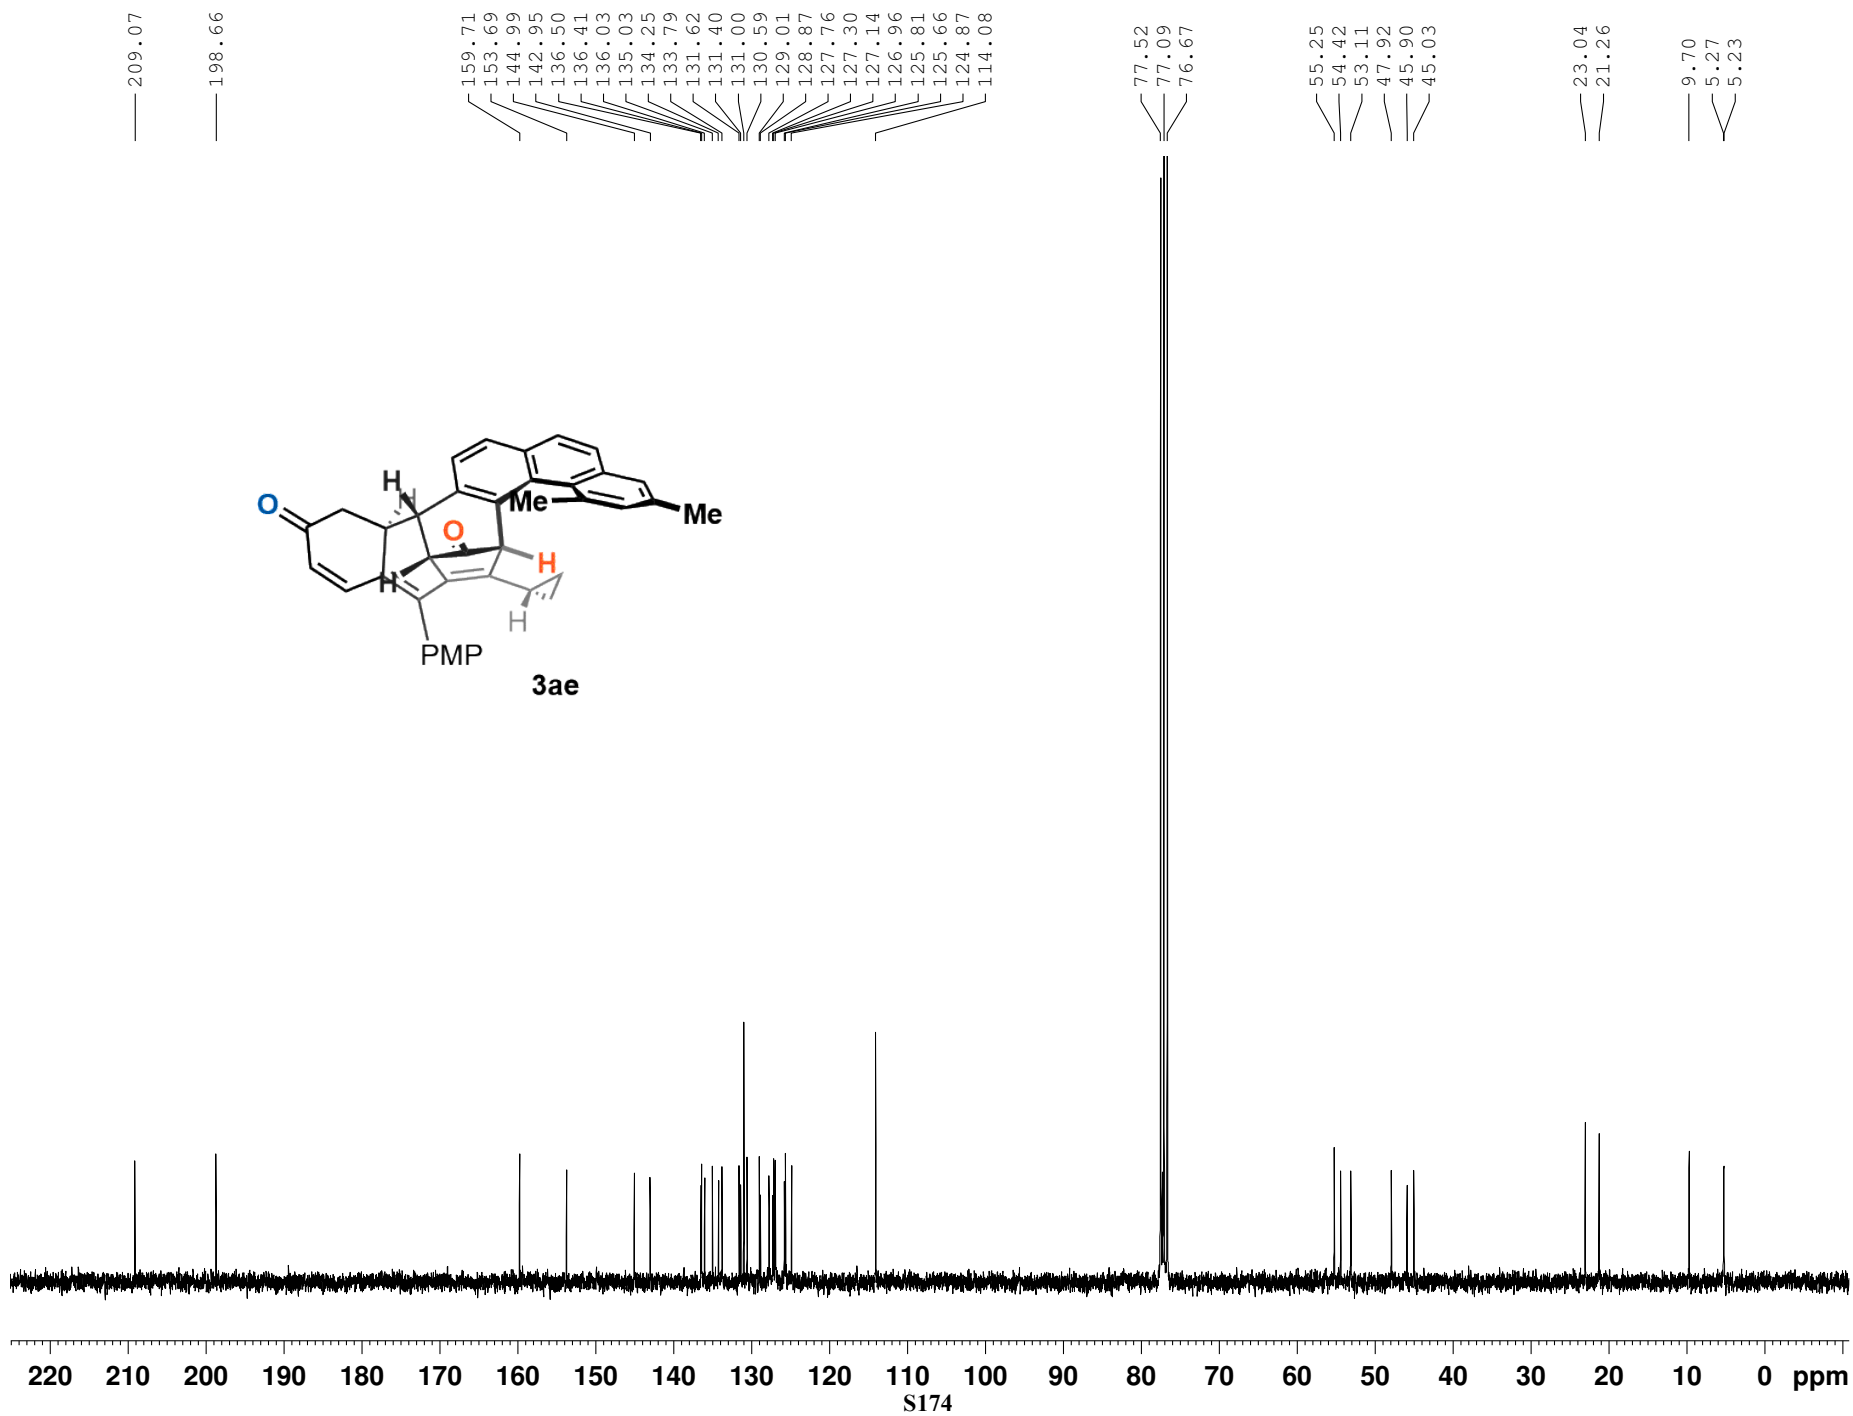

7.845  
7.816  
7.783  
7.656  
7.623  
7.551  
7.531  
7.505  
7.431  
7.407  
7.387  
7.362  
7.340  
7.271  
7.244  
6.914  
6.886

6.012  
5.979

4.409

3.860  
3.842  
3.761  
3.728  
3.695  
3.500  
3.486  
3.005  
2.972  
2.767  
2.721

0.507  
0.478  
0.463  
0.448  
0.418  
0.045  
0.015  
-0.000  
-0.017  
-0.046  
-0.180  
-0.198  
-0.214  
-0.229  
-0.246  
-0.263  
-0.416  
-0.446  
-0.463  
-0.481  
-0.510  
-1.331  
-1.348  
-1.364  
-1.379  
-1.396  
-1.414

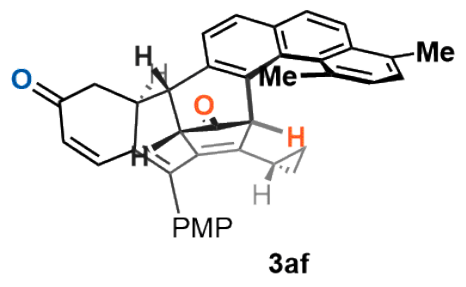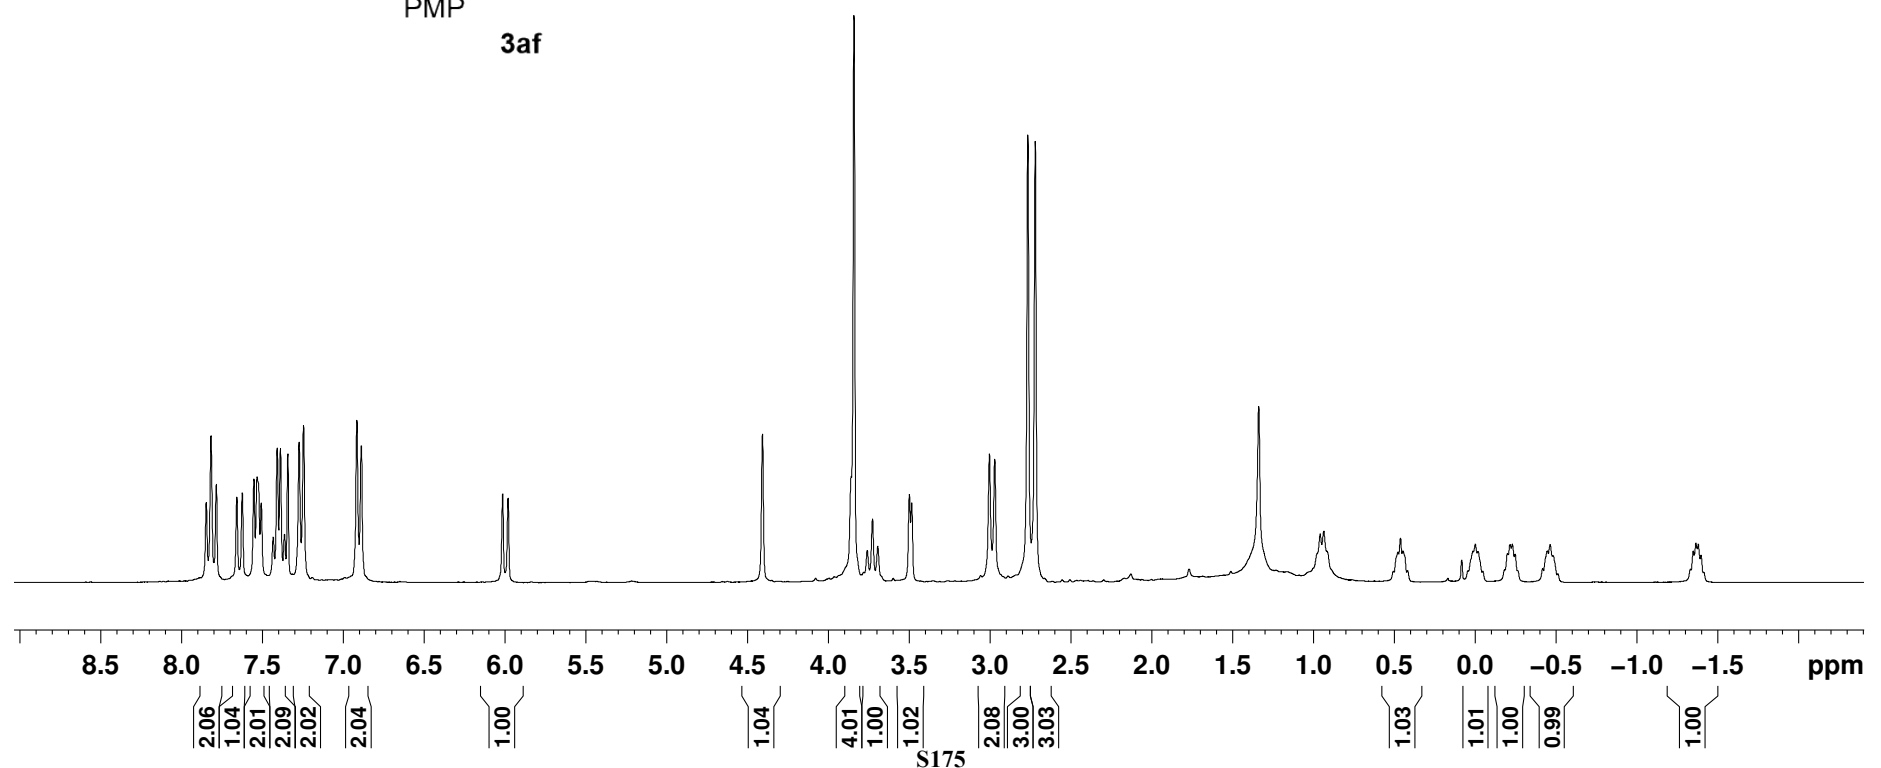



— 209.15

— 198.74

159.69  
153.77  
145.05  
142.98  
136.46  
136.38  
133.73  
132.92  
132.69  
131.62  
131.29  
131.02  
130.98  
129.35  
129.03  
128.95  
128.23  
128.13  
128.03  
127.03  
125.78  
125.43  
122.99  
114.07

55.26  
54.36  
52.97  
47.87  
45.91  
45.05

22.96  
19.57

9.67  
5.28  
5.18

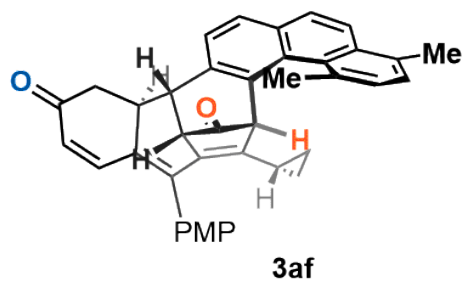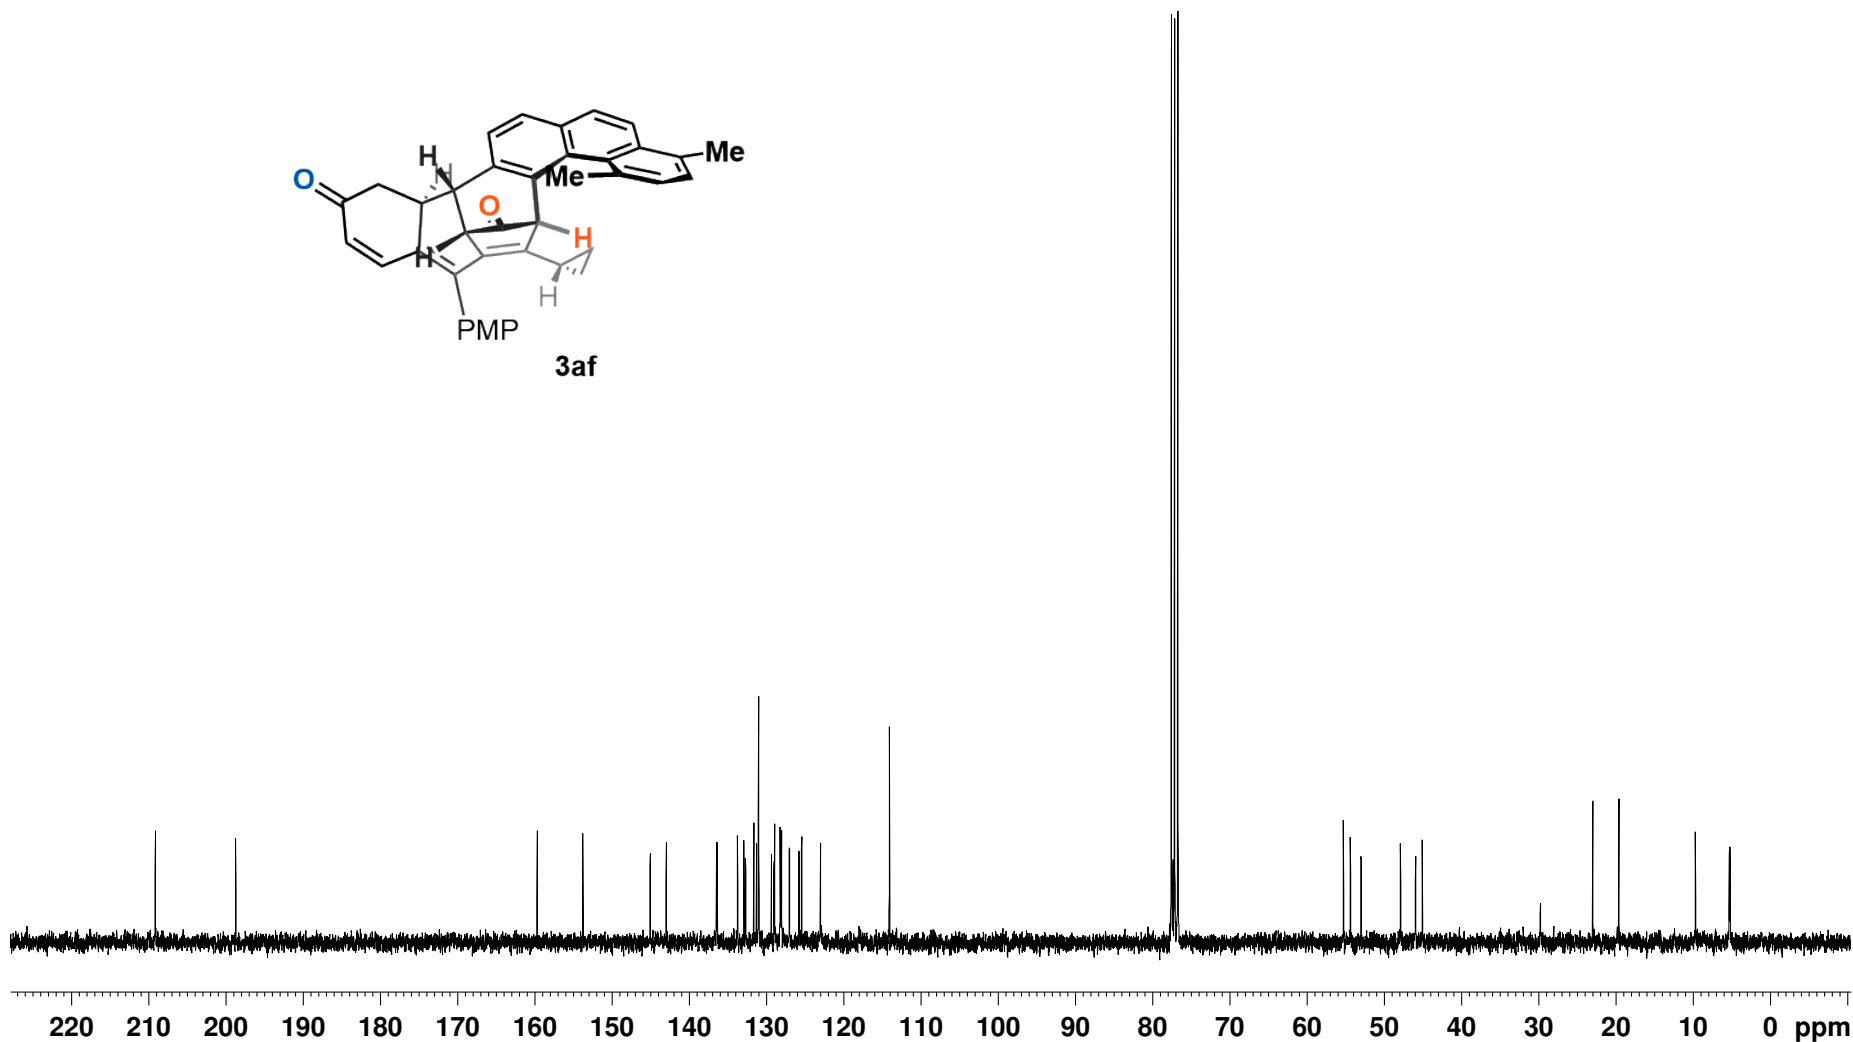

7.868  
7.838  
7.824  
7.797  
7.657  
7.624  
7.517  
7.508  
7.486  
7.348  
7.301  
7.281  
7.253  
6.924  
6.897

6.016  
5.982

4.391  
3.853  
3.769  
3.736  
3.703  
3.496  
3.482  
3.006  
2.973  
2.697  
2.673  
2.566

0.524  
0.495  
0.479  
0.465  
0.435  
0.045  
0.015  
-0.000  
-0.017  
-0.046  
-0.170  
-0.187  
-0.203  
-0.218  
-0.235  
-0.252  
-0.403  
-0.432  
-0.449  
-0.469  
-0.497  
-1.266  
-1.284  
-1.300  
-1.315

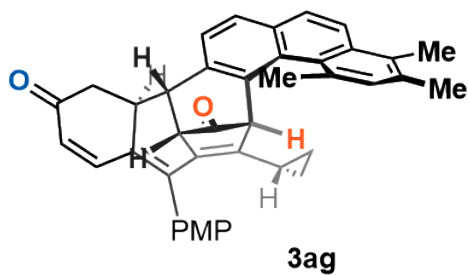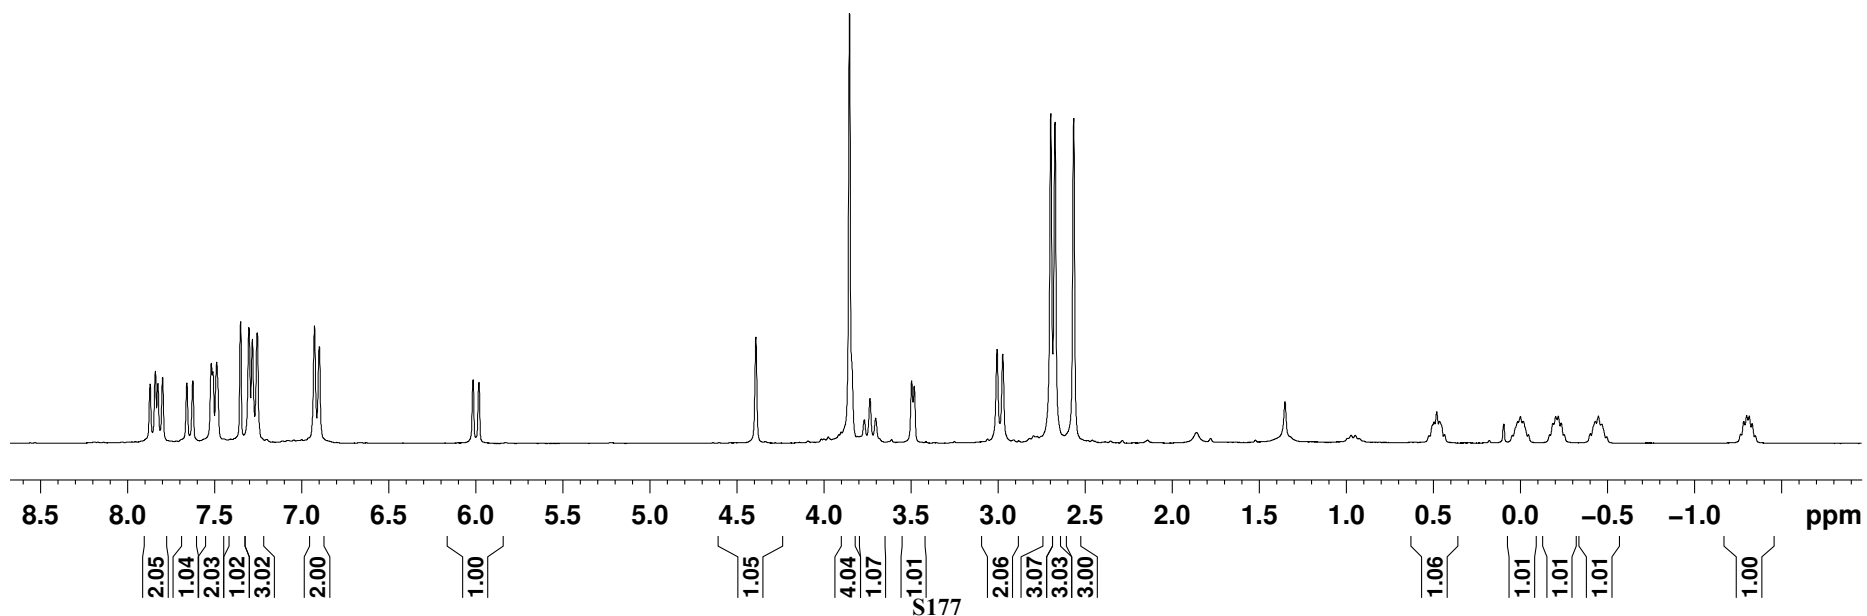

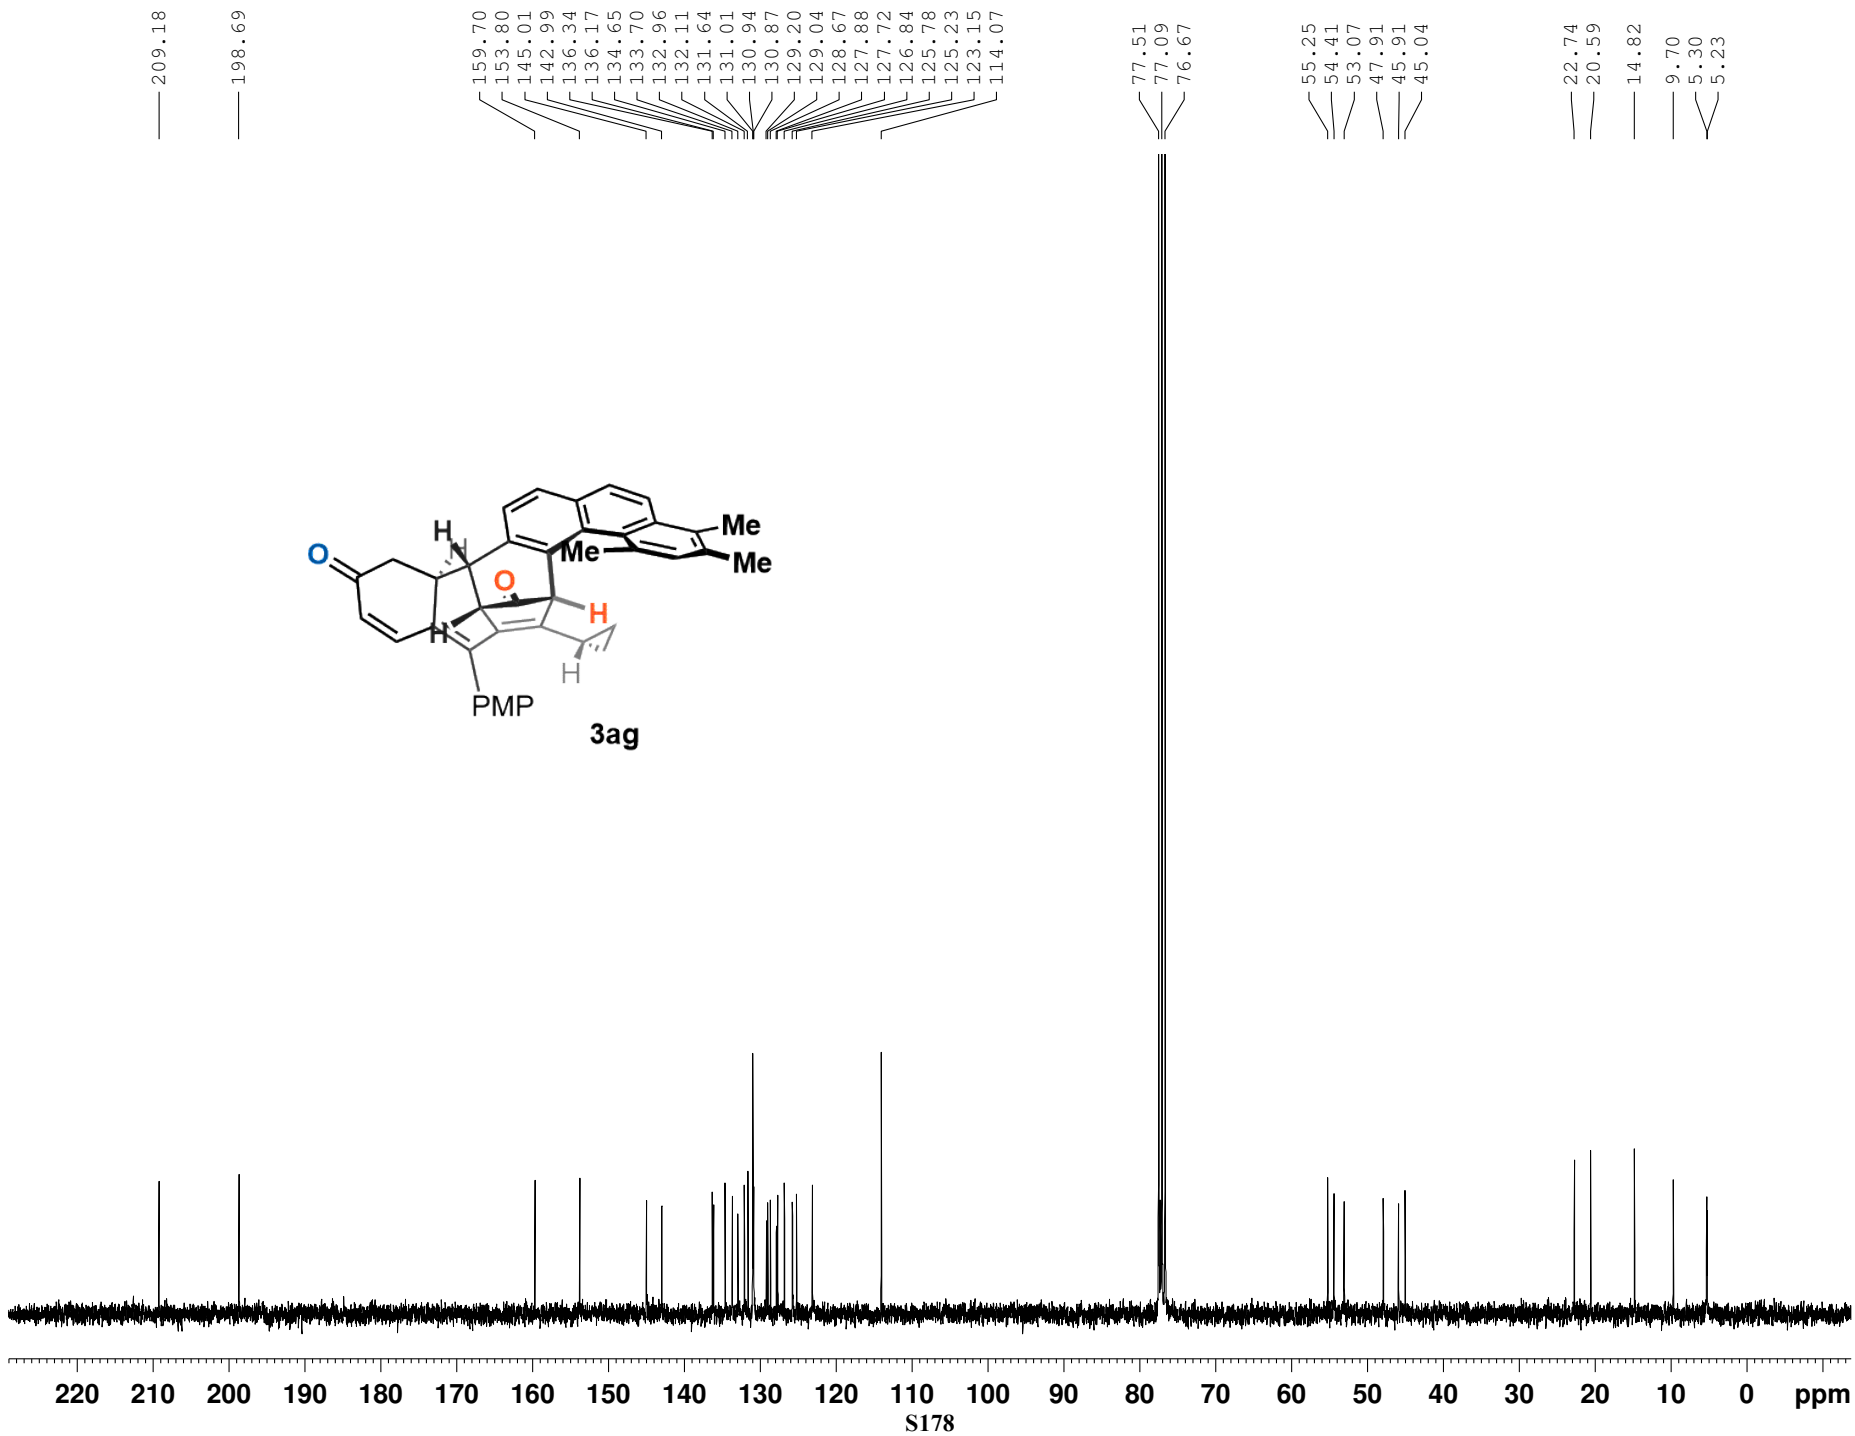

7.767  
7.740  
7.583  
7.549  
7.441  
7.412  
7.324  
7.295  
7.268  
7.197  
7.173  
6.845  
6.818

5.941  
5.907

4.233  
3.772  
3.685  
3.653  
3.620  
3.432  
3.421  
2.927  
2.895  
2.695

0.417  
0.088  
-0.000  
-0.023  
-0.254  
-0.265  
-0.478

-1.420  
-1.432

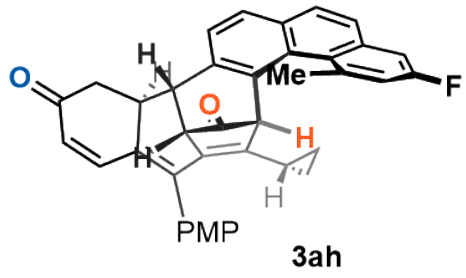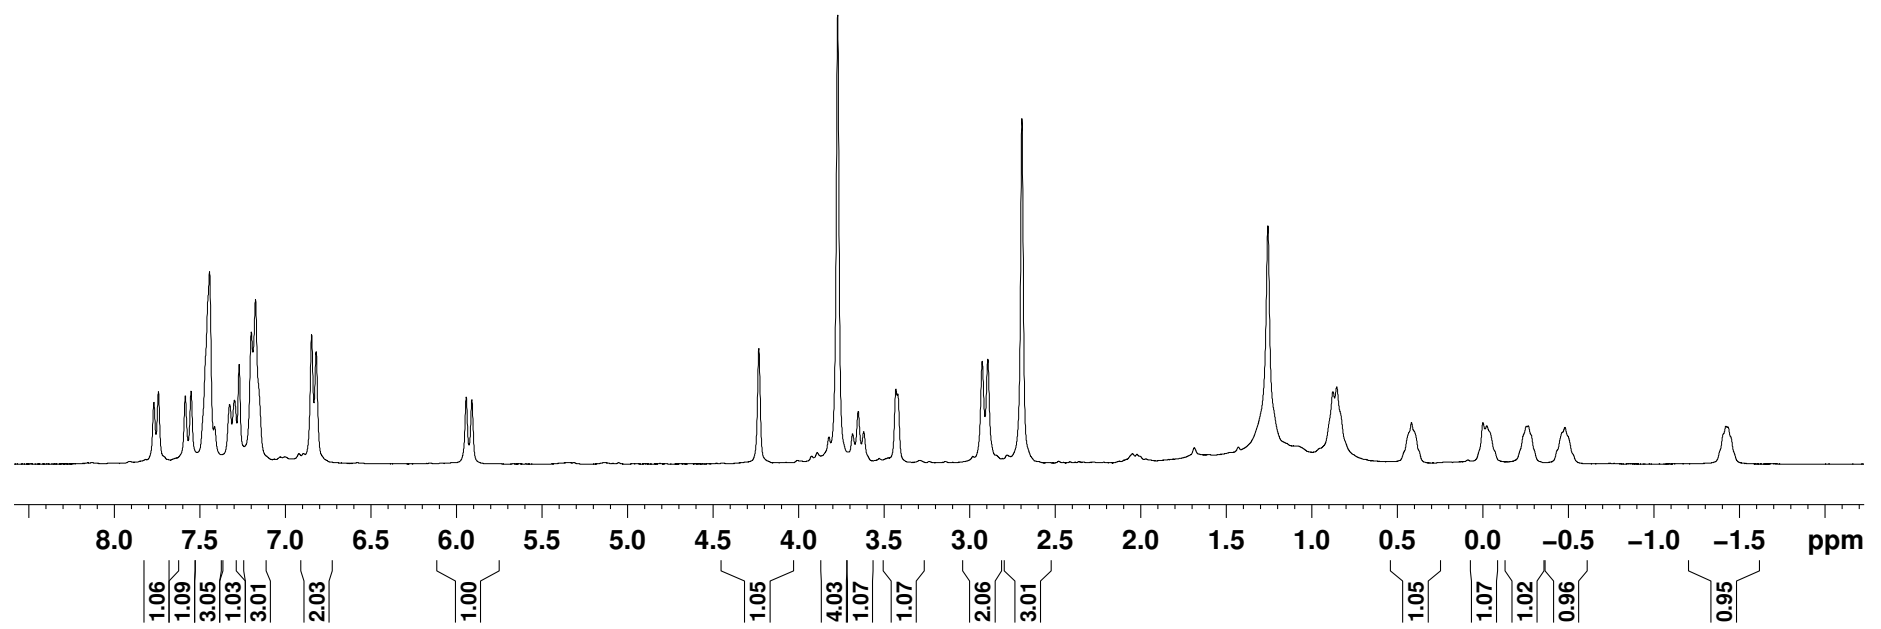

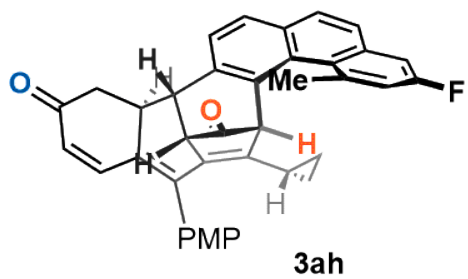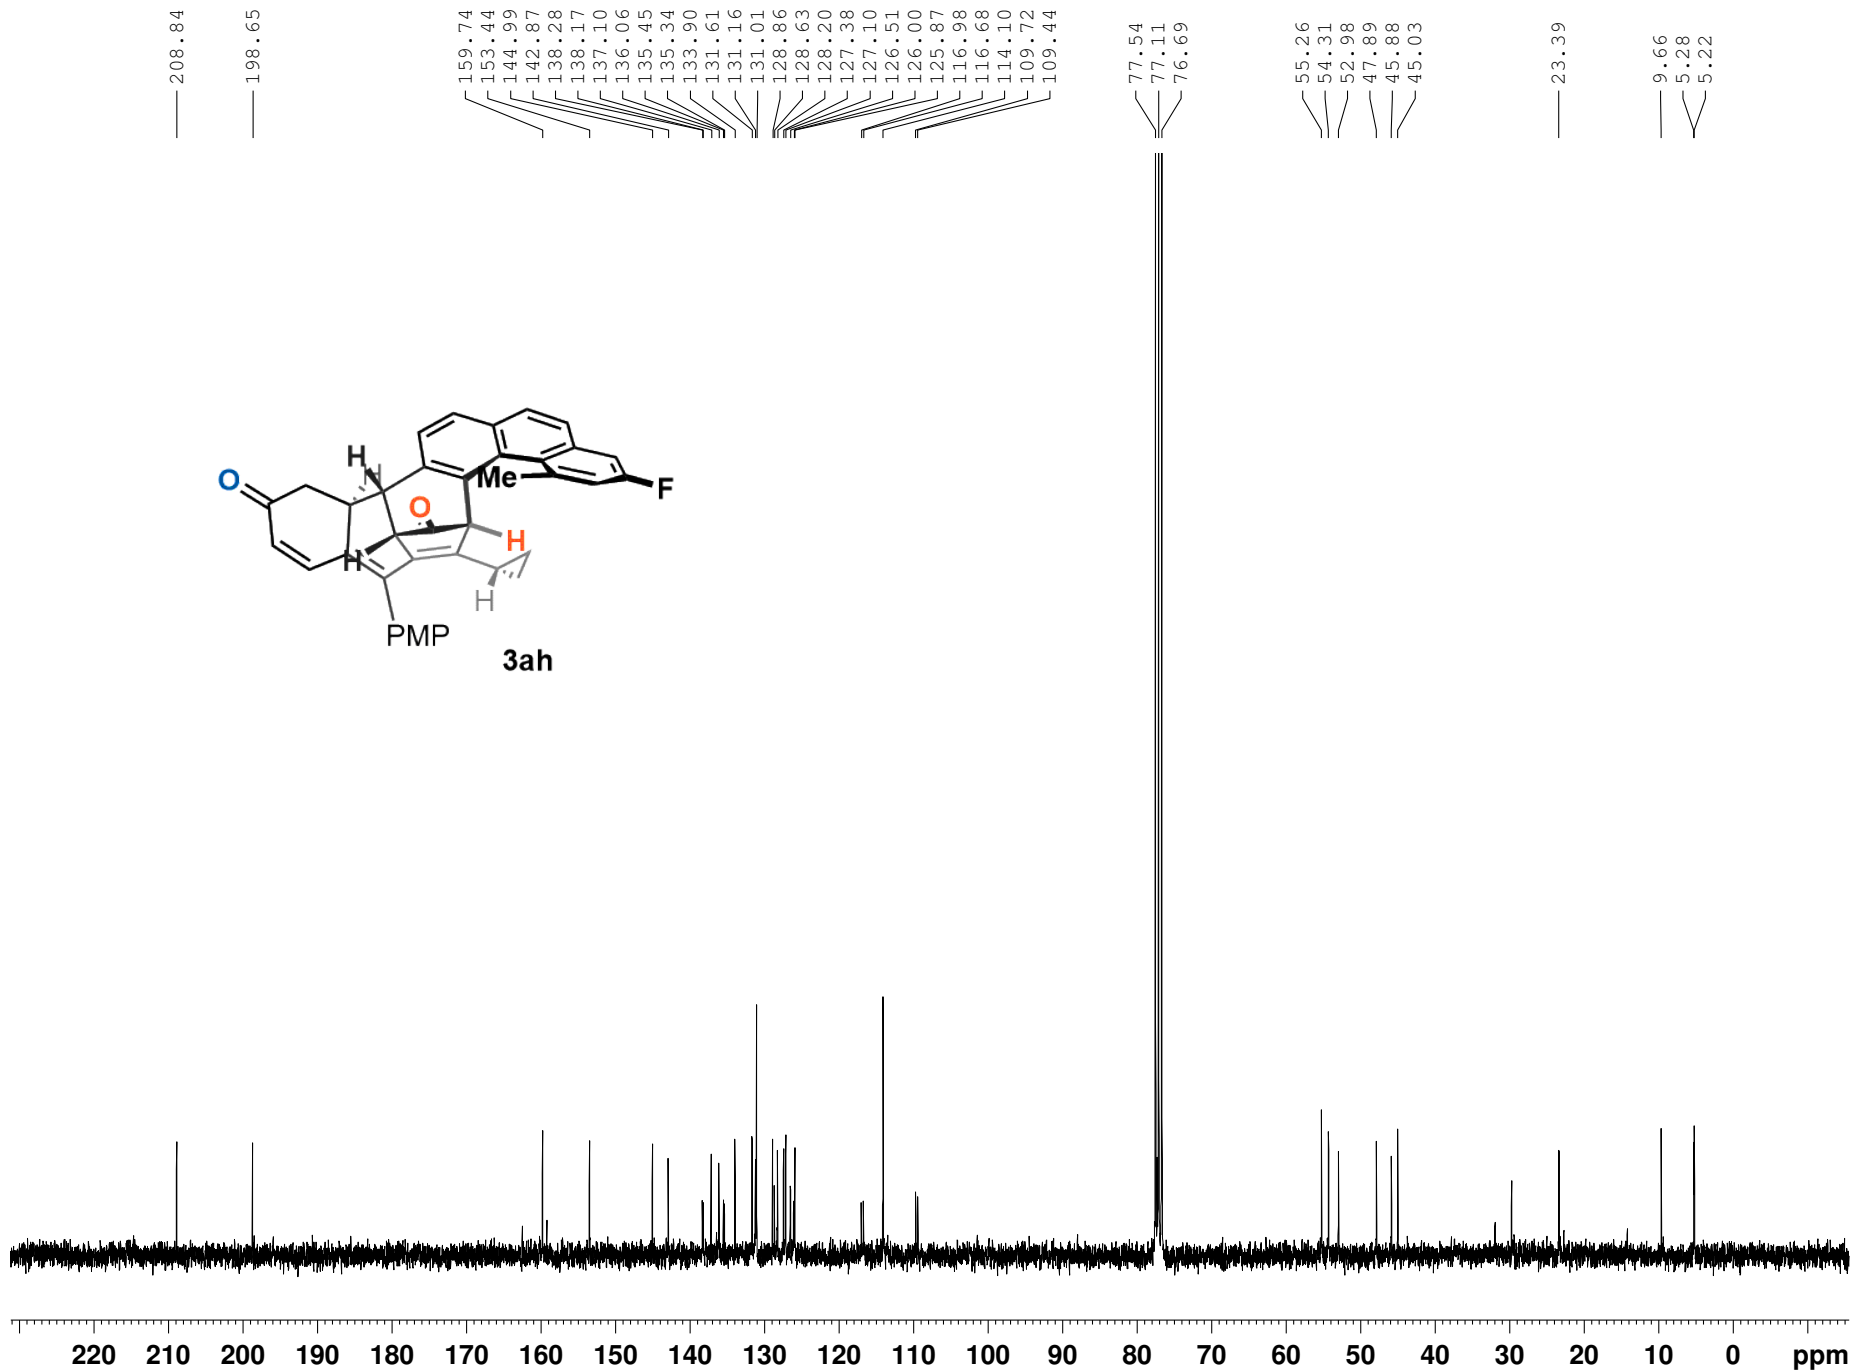

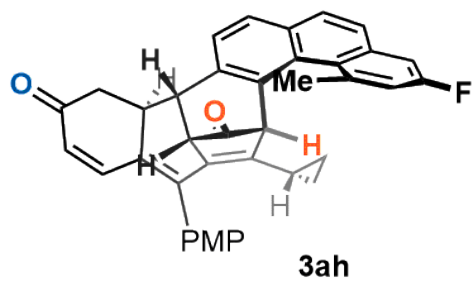

— -115.15

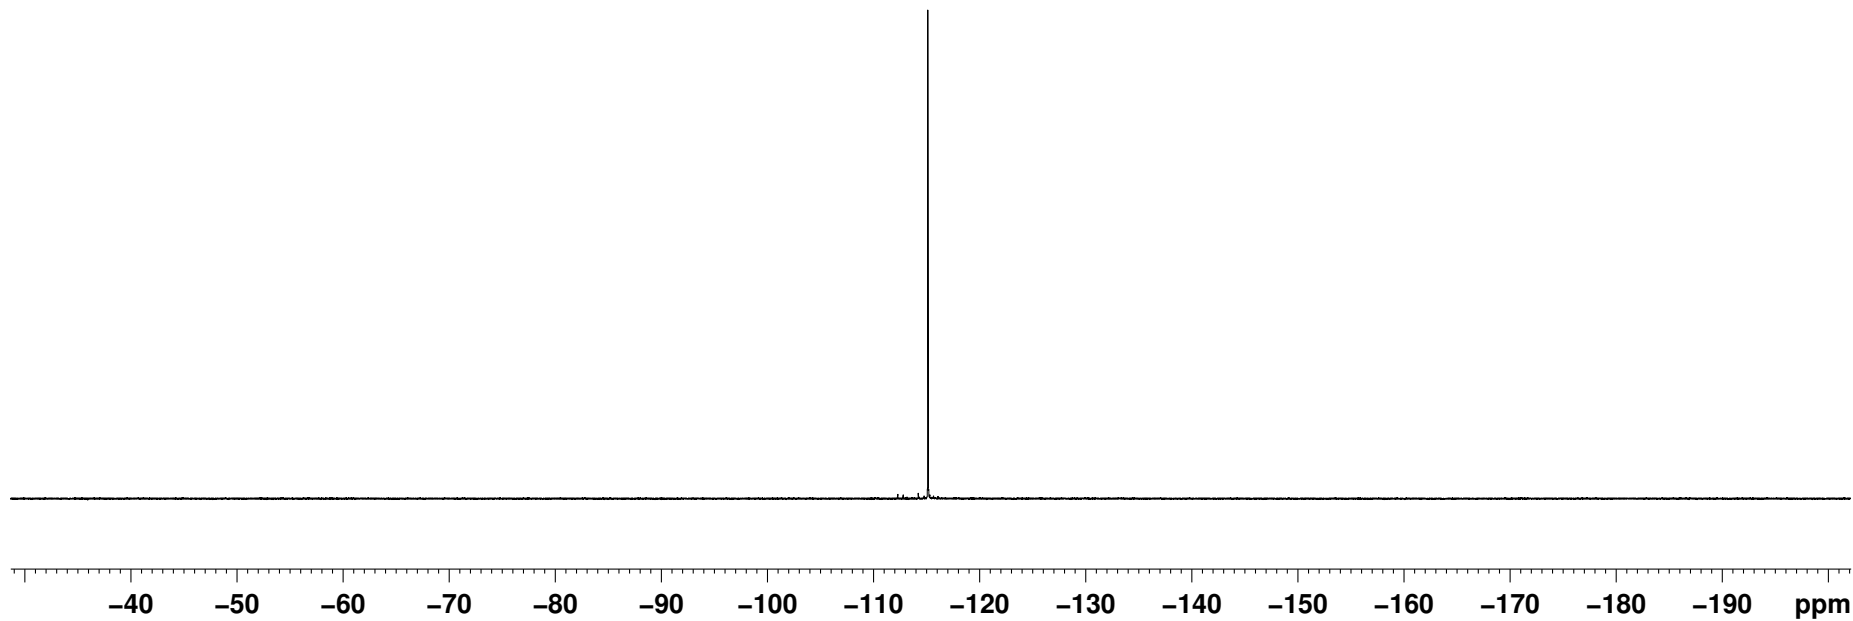

S181

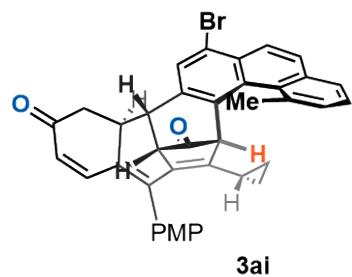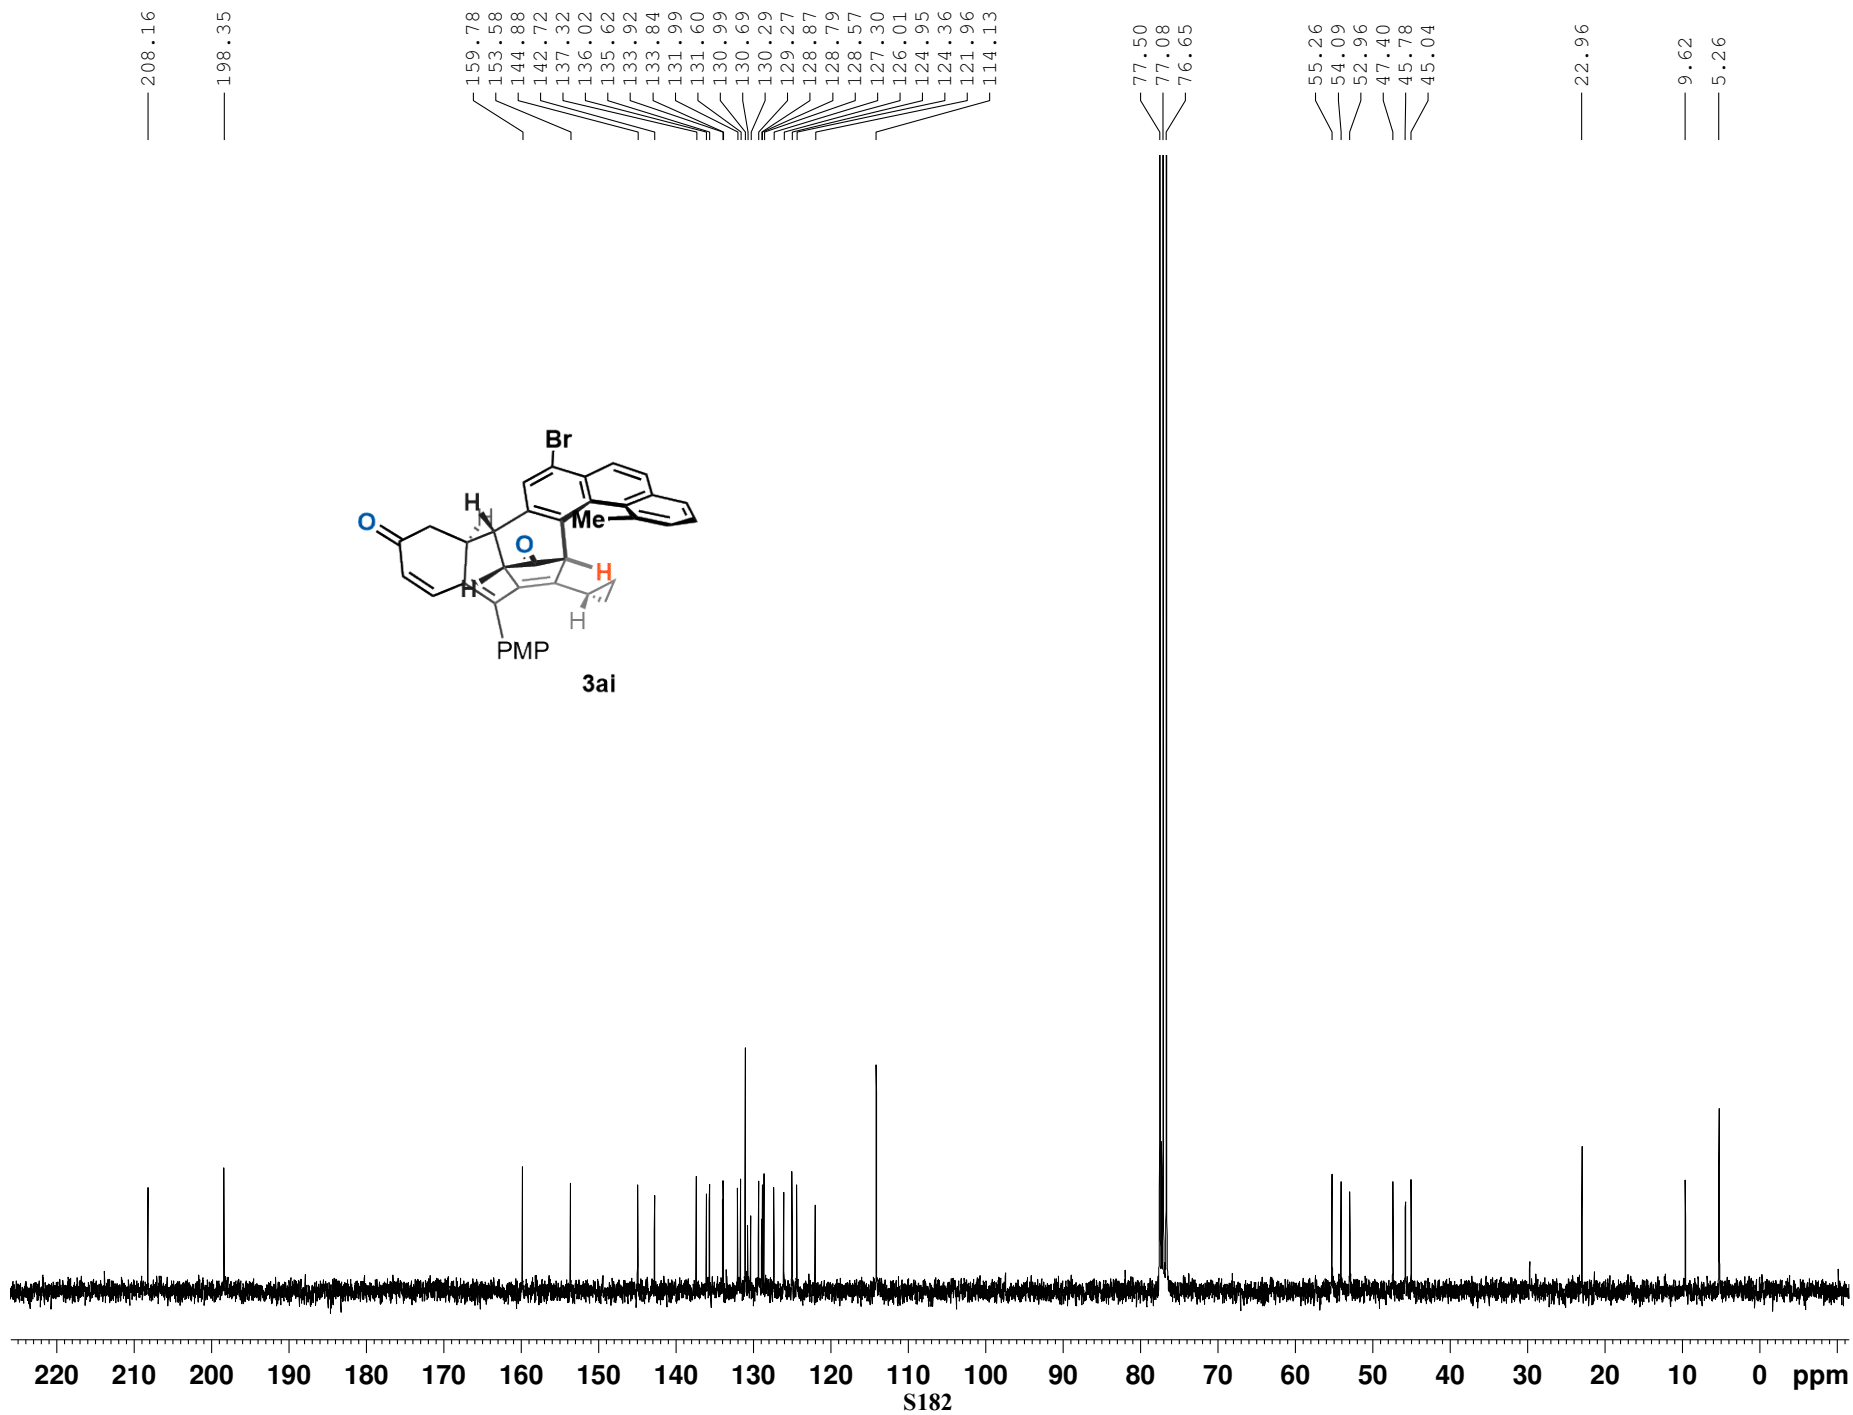

7.916  
7.886  
7.742  
7.714  
7.654  
7.640  
7.624  
7.607  
7.585  
7.559  
7.499  
7.475  
7.328  
7.266  
7.238  
6.907  
6.880

6.011  
5.977

4.311  
3.832  
3.802  
3.788  
3.697  
3.664  
3.631  
3.479  
3.465  
2.975  
2.942  
2.721

0.506  
0.477  
0.461  
0.446  
0.417  
0.064  
0.046  
0.014  
-0.000  
-0.016  
-0.046  
-0.246  
-0.263  
-0.277  
-0.294  
-0.311  
-0.391  
-0.419  
-0.436  
-0.457  
-0.485  
-1.381  
-1.399  
-1.415  
-1.430  
-1.447

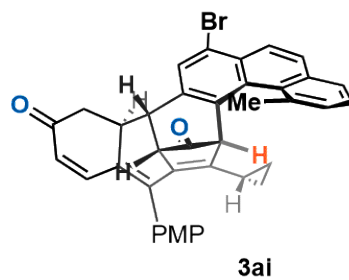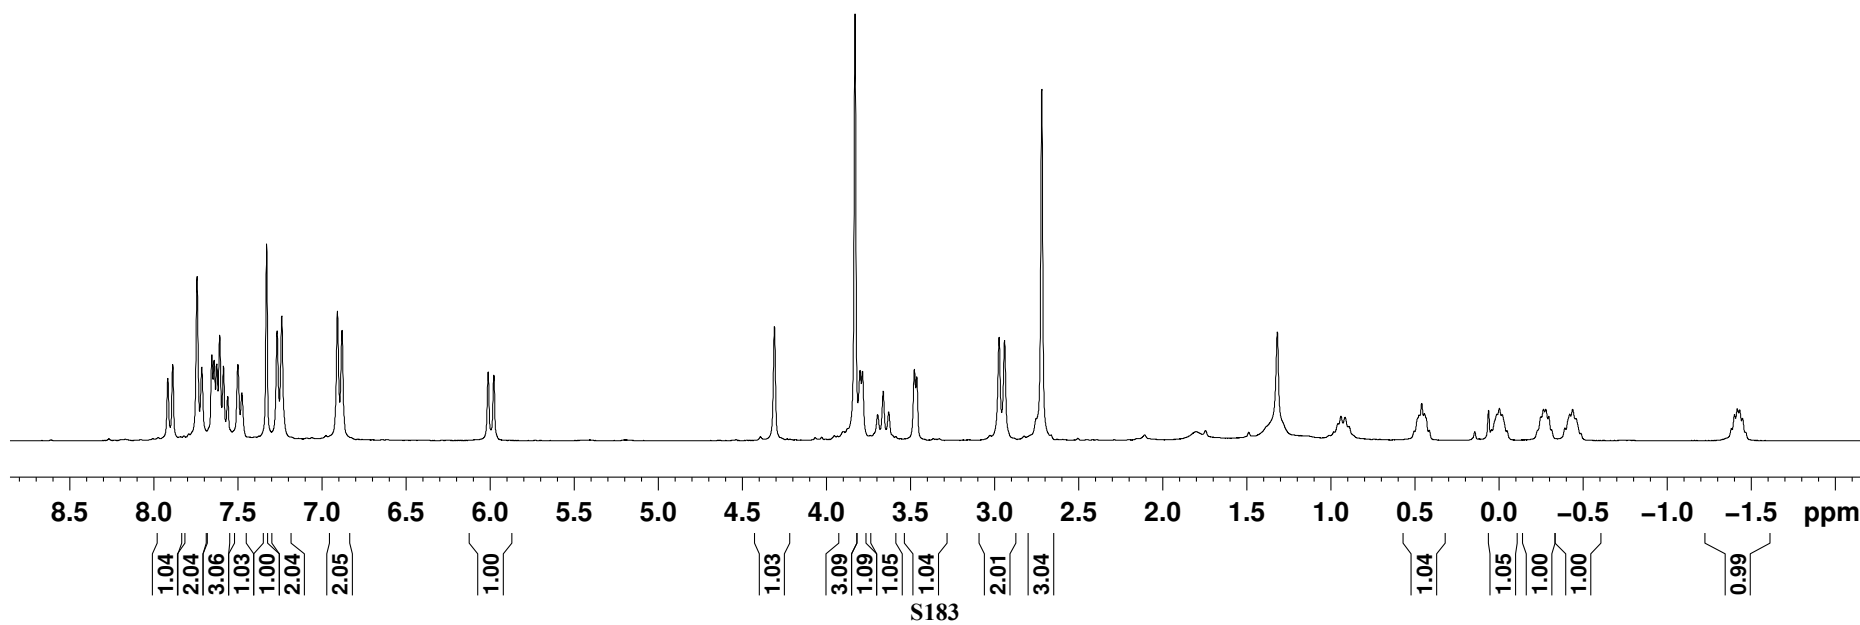



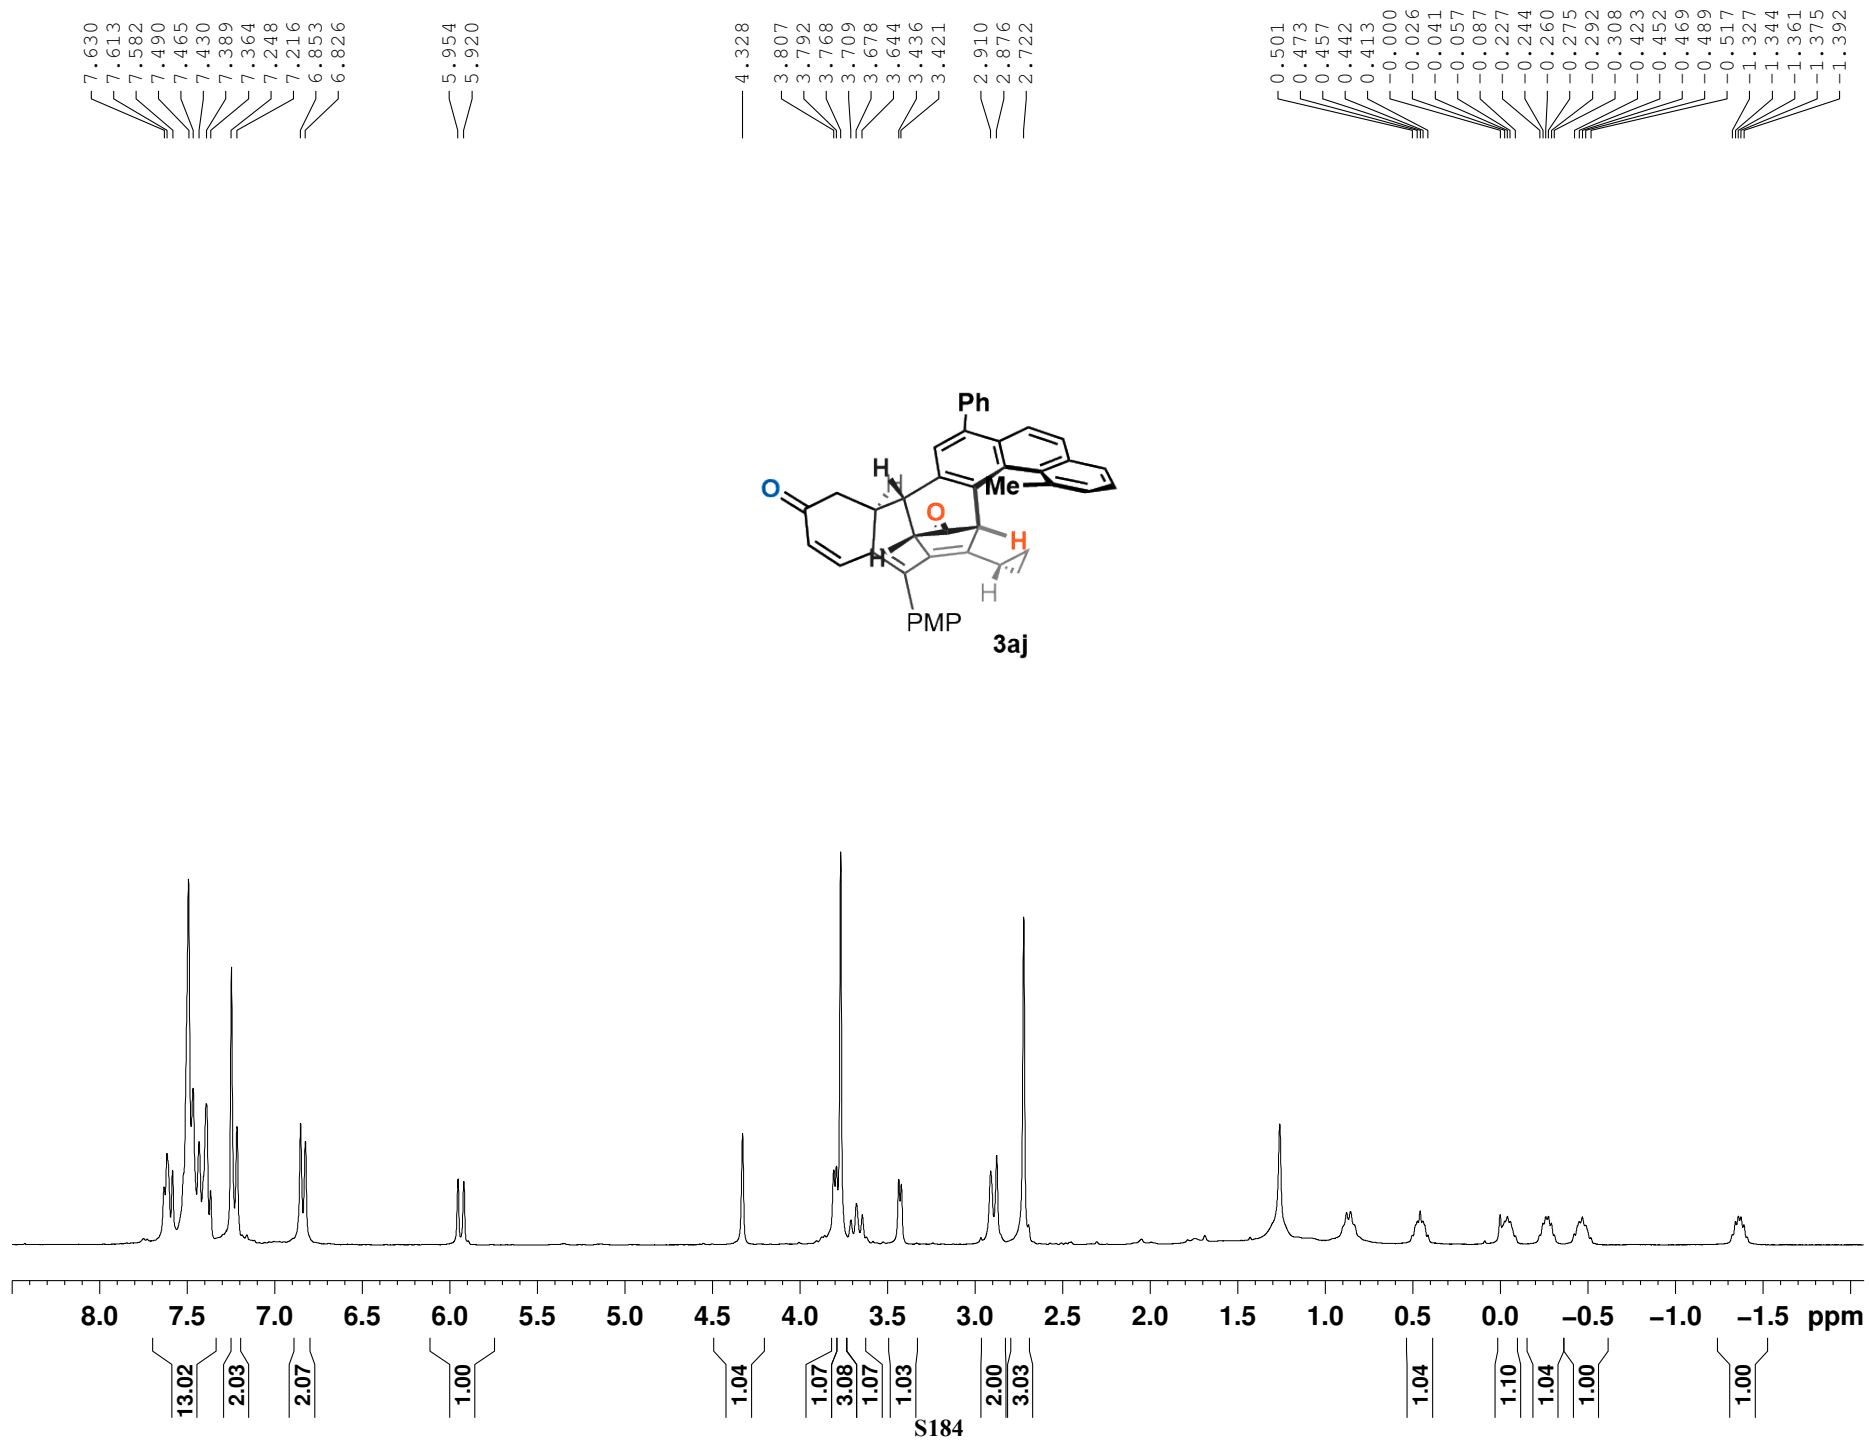

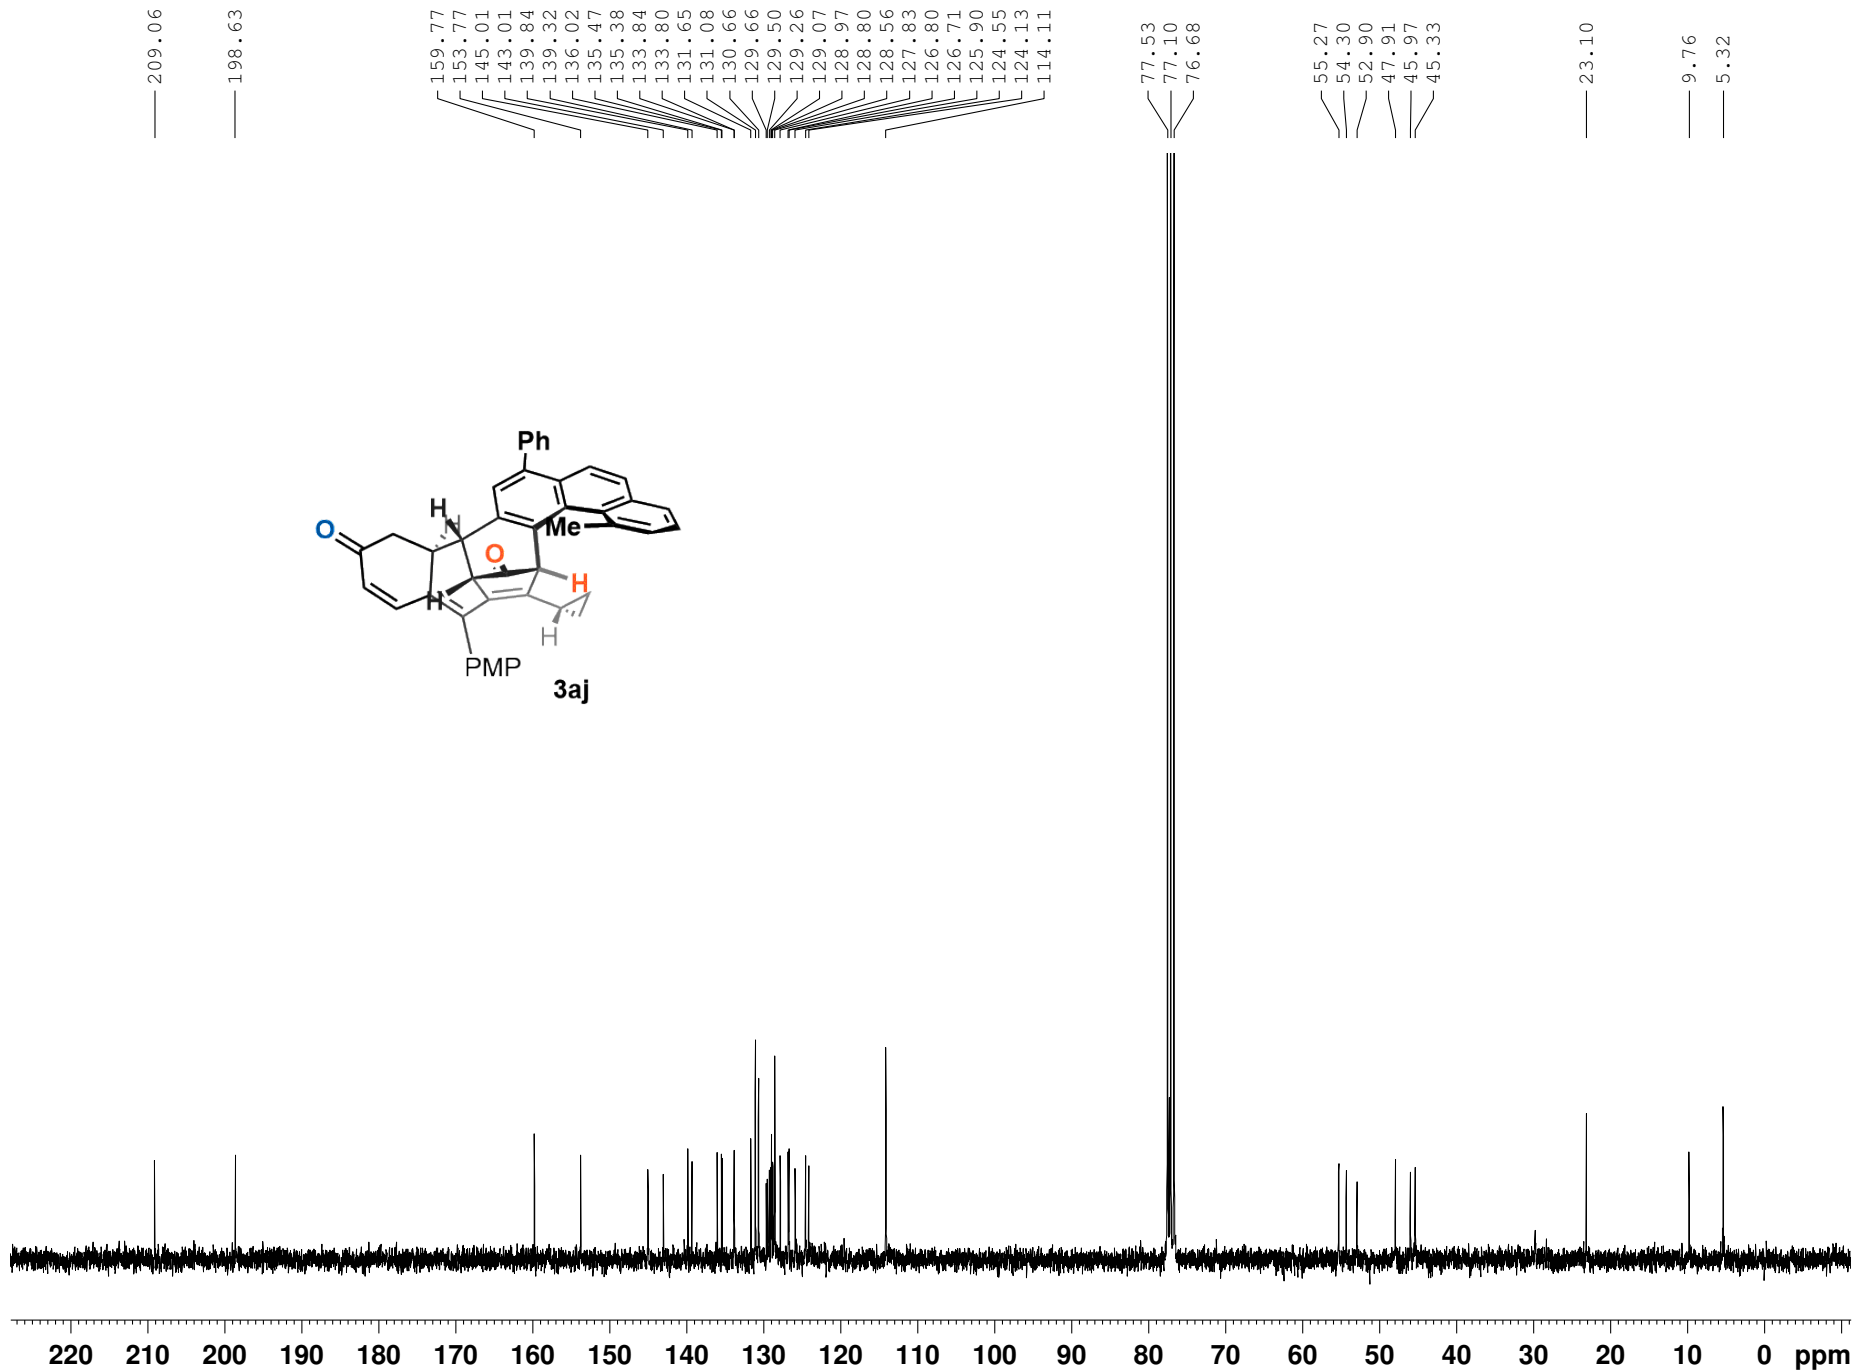

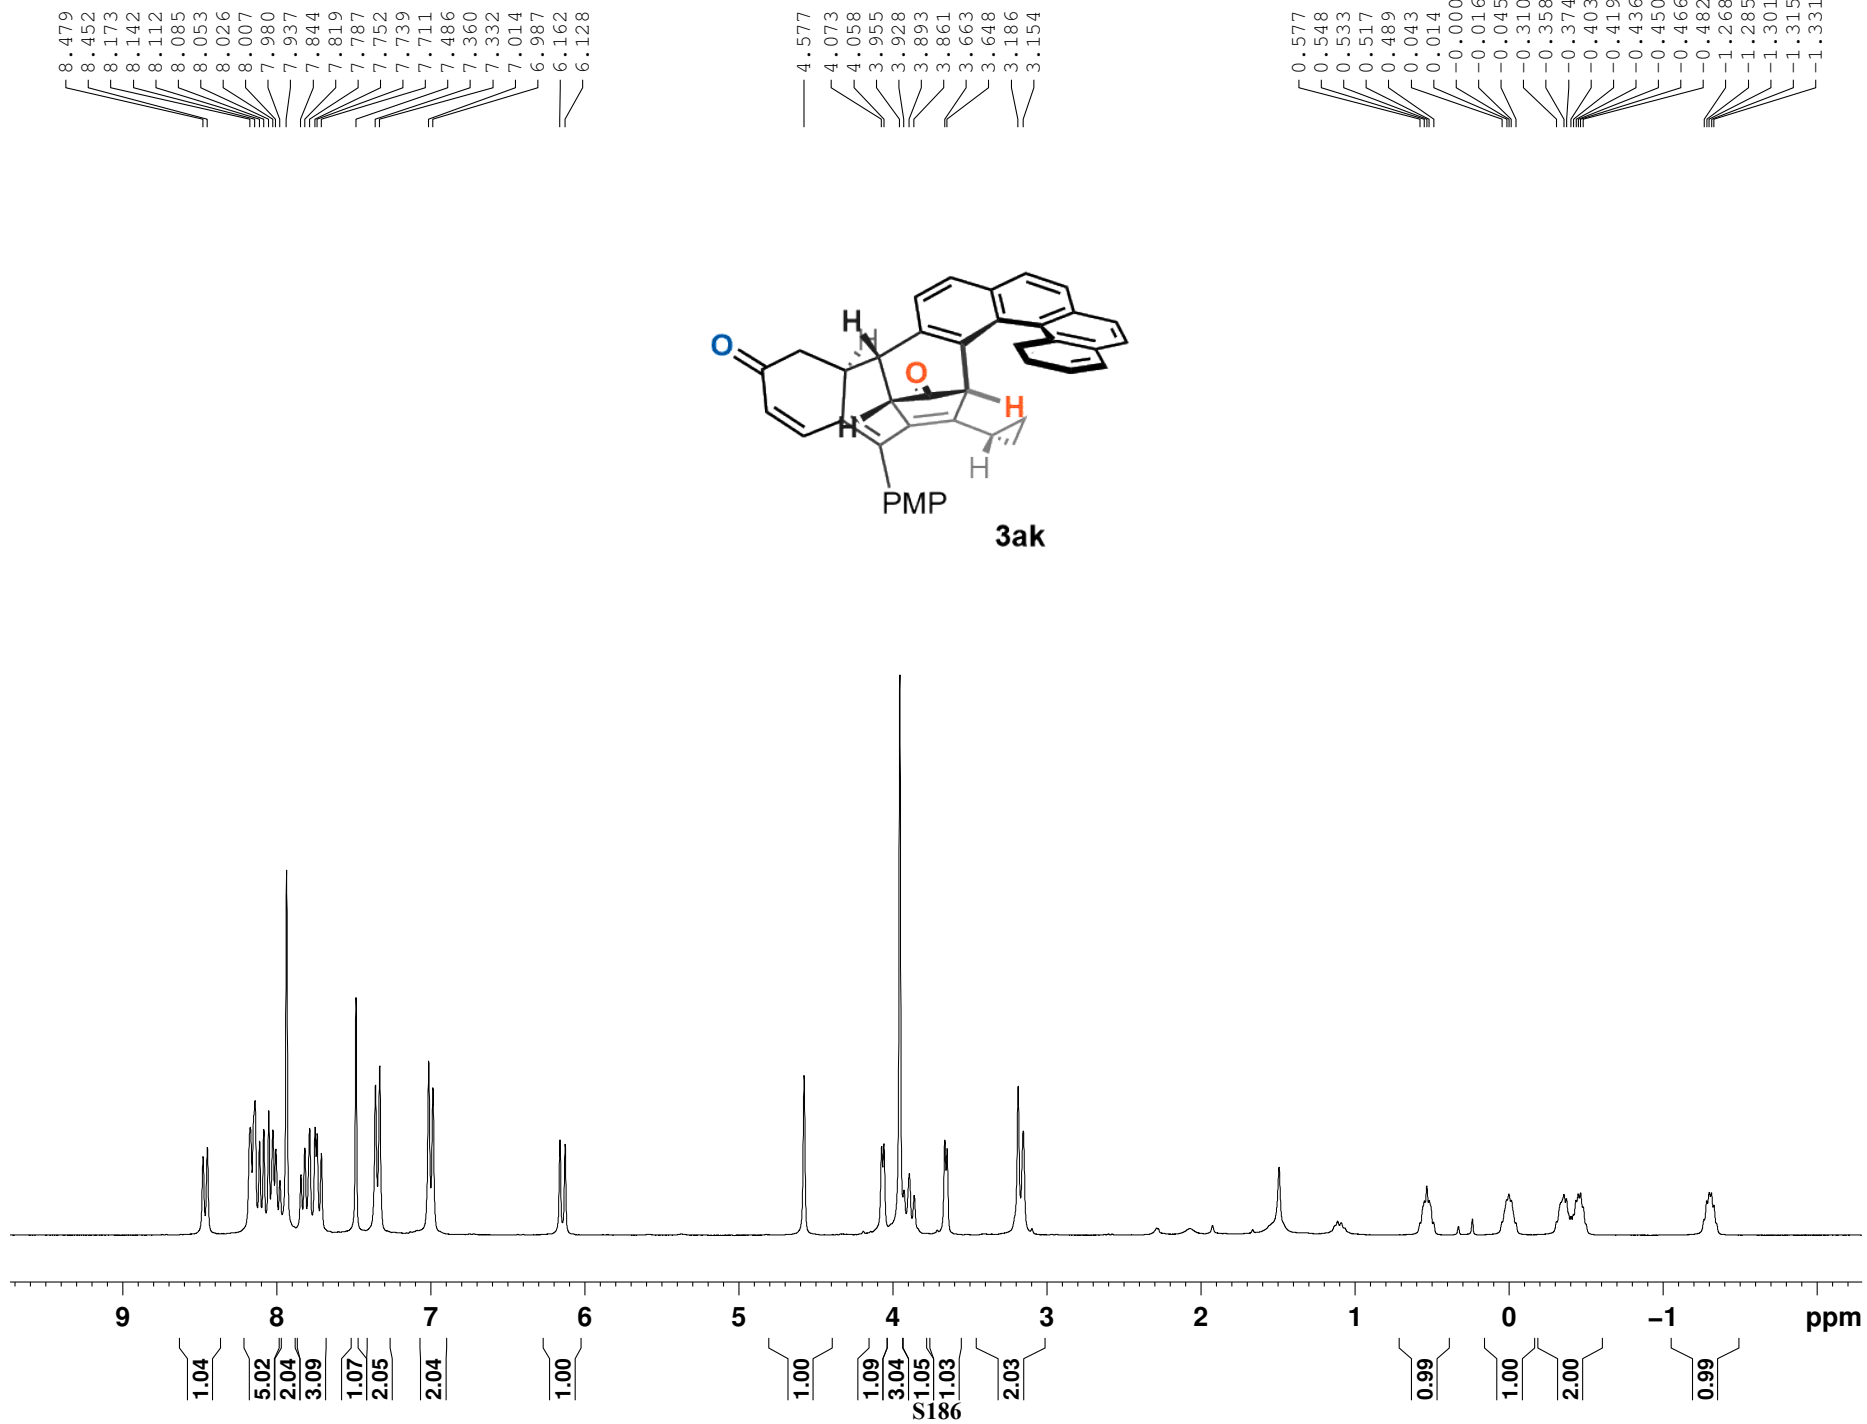

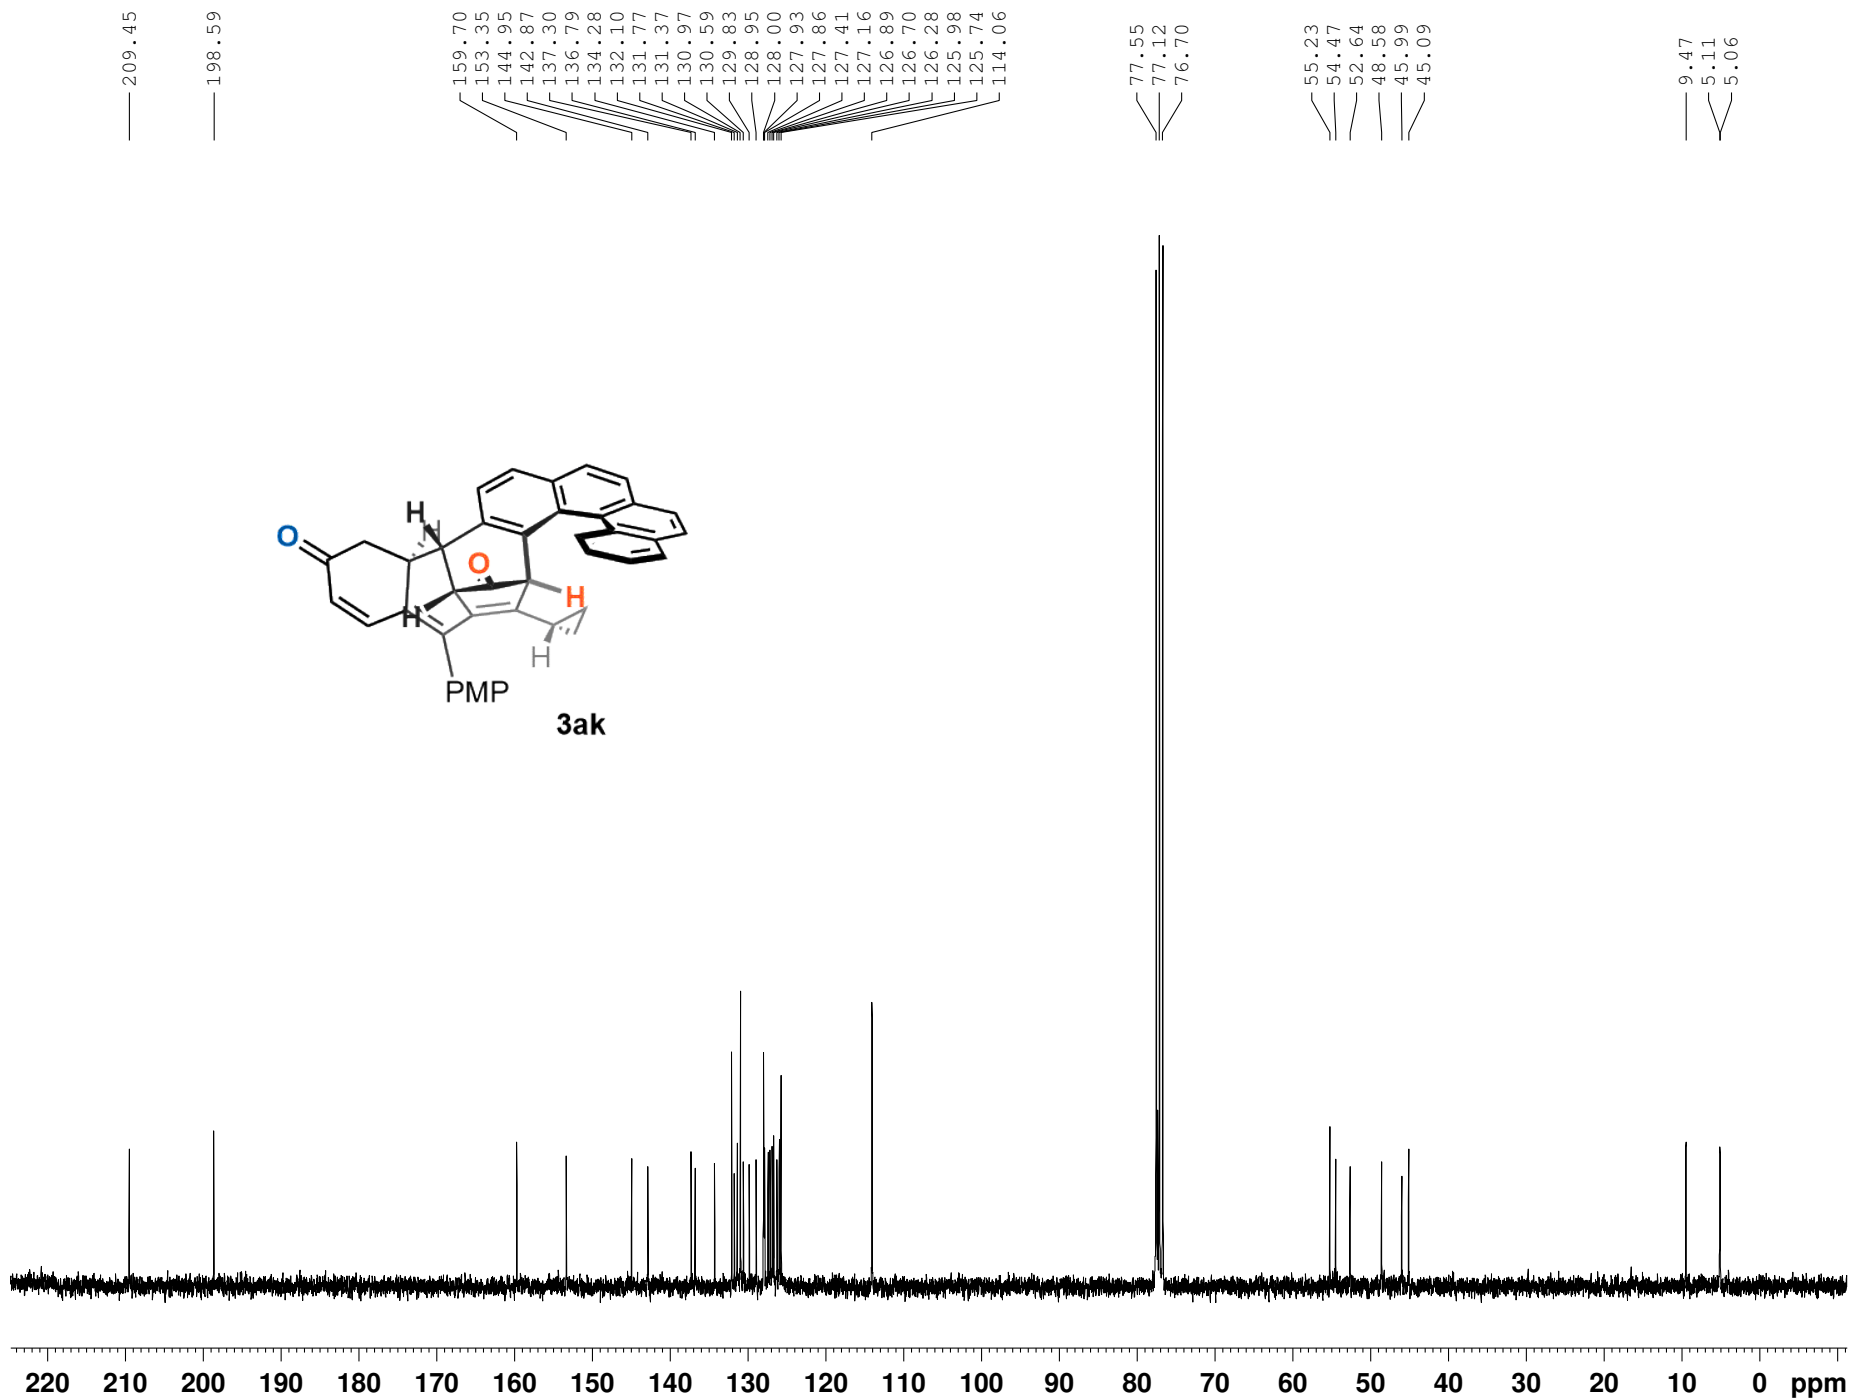

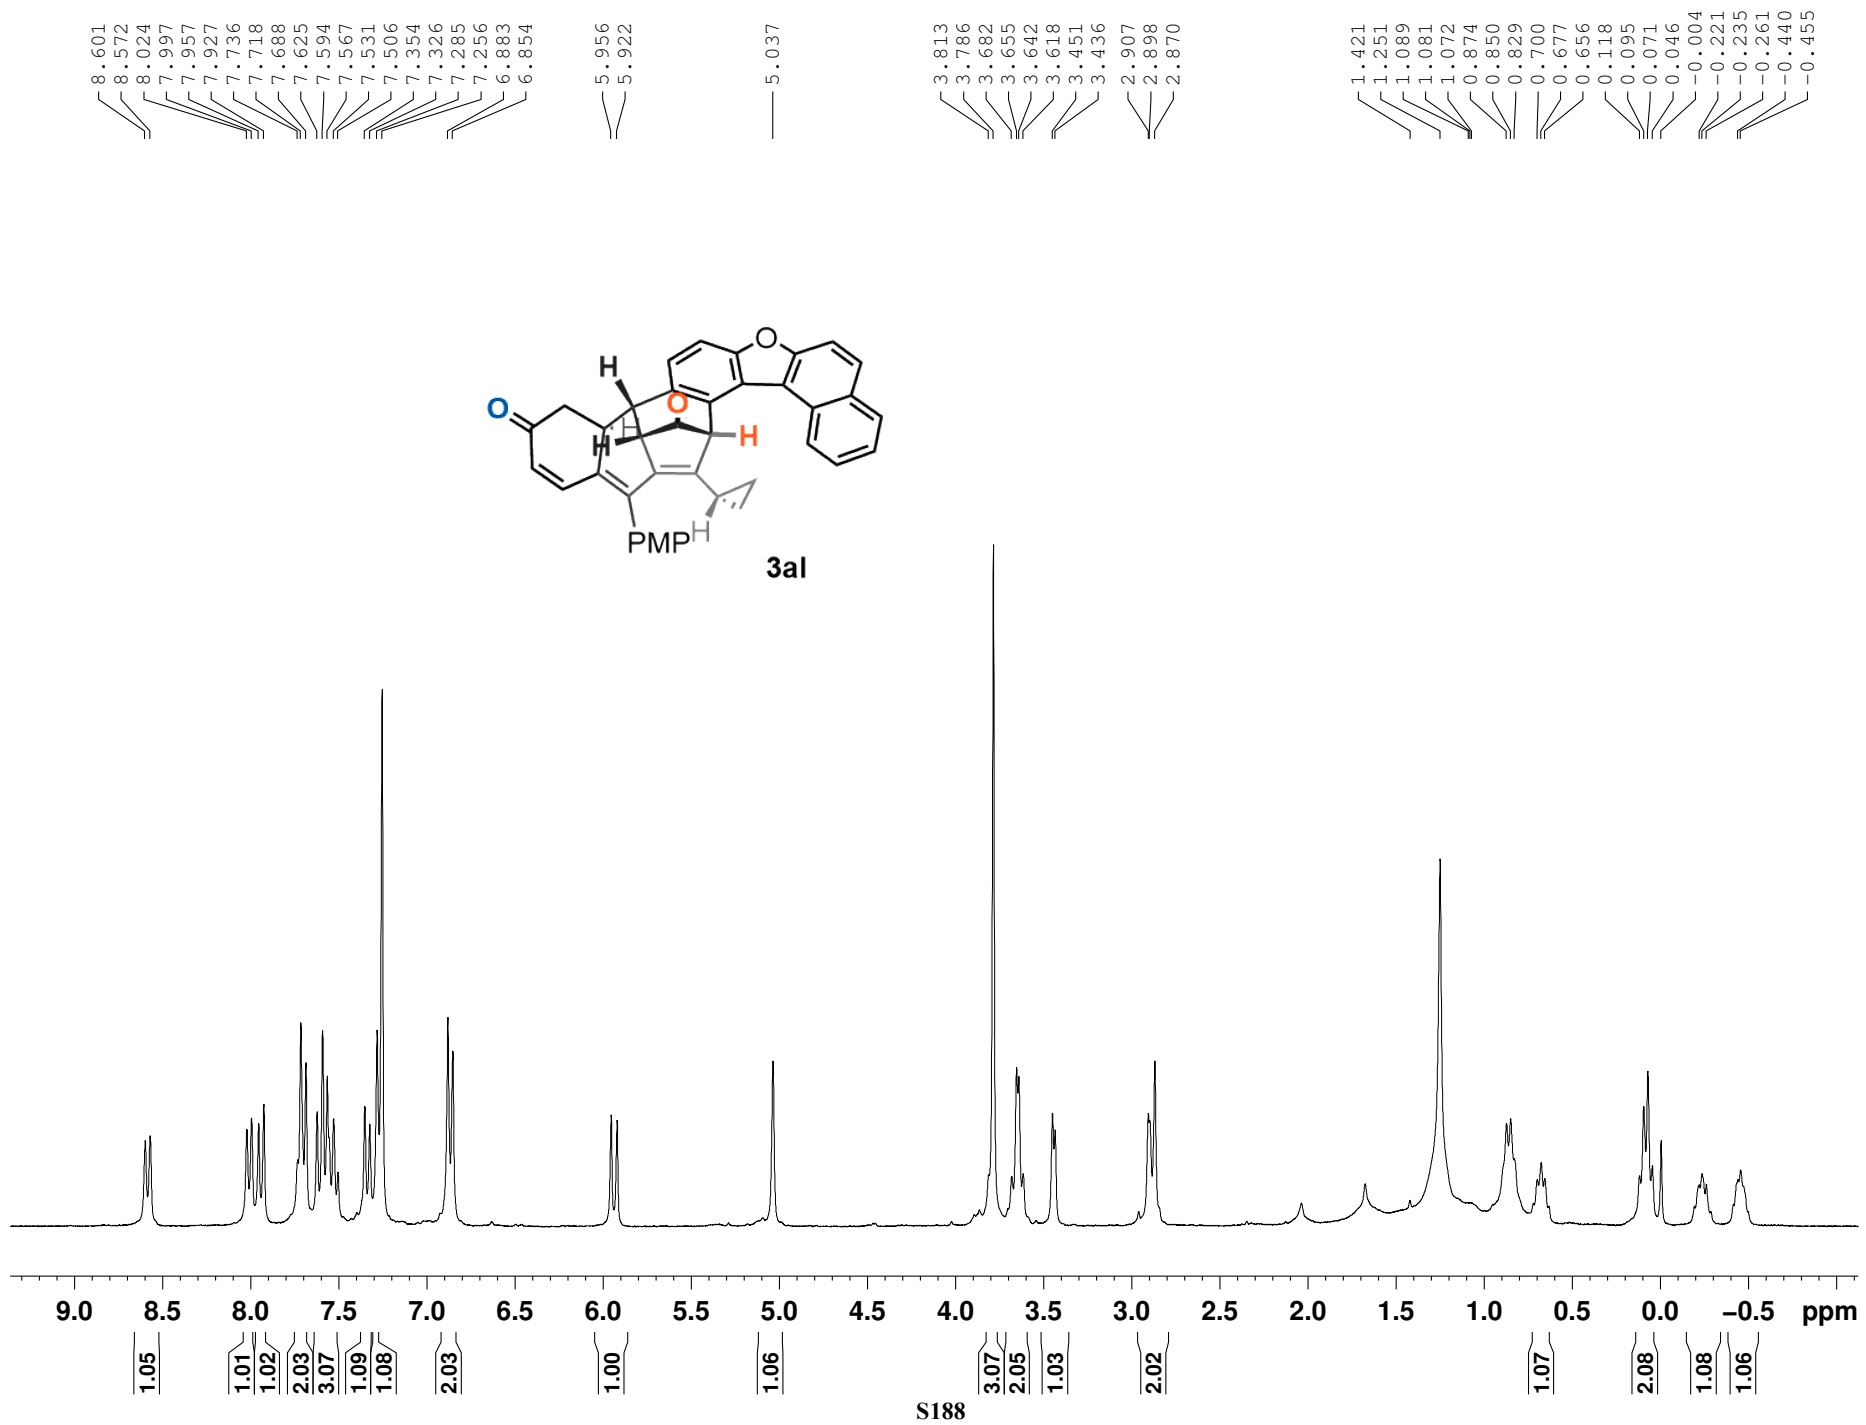

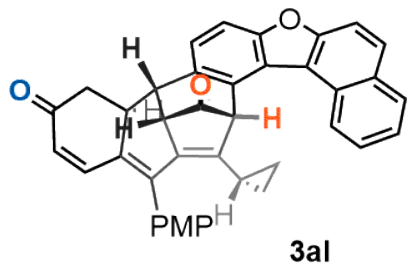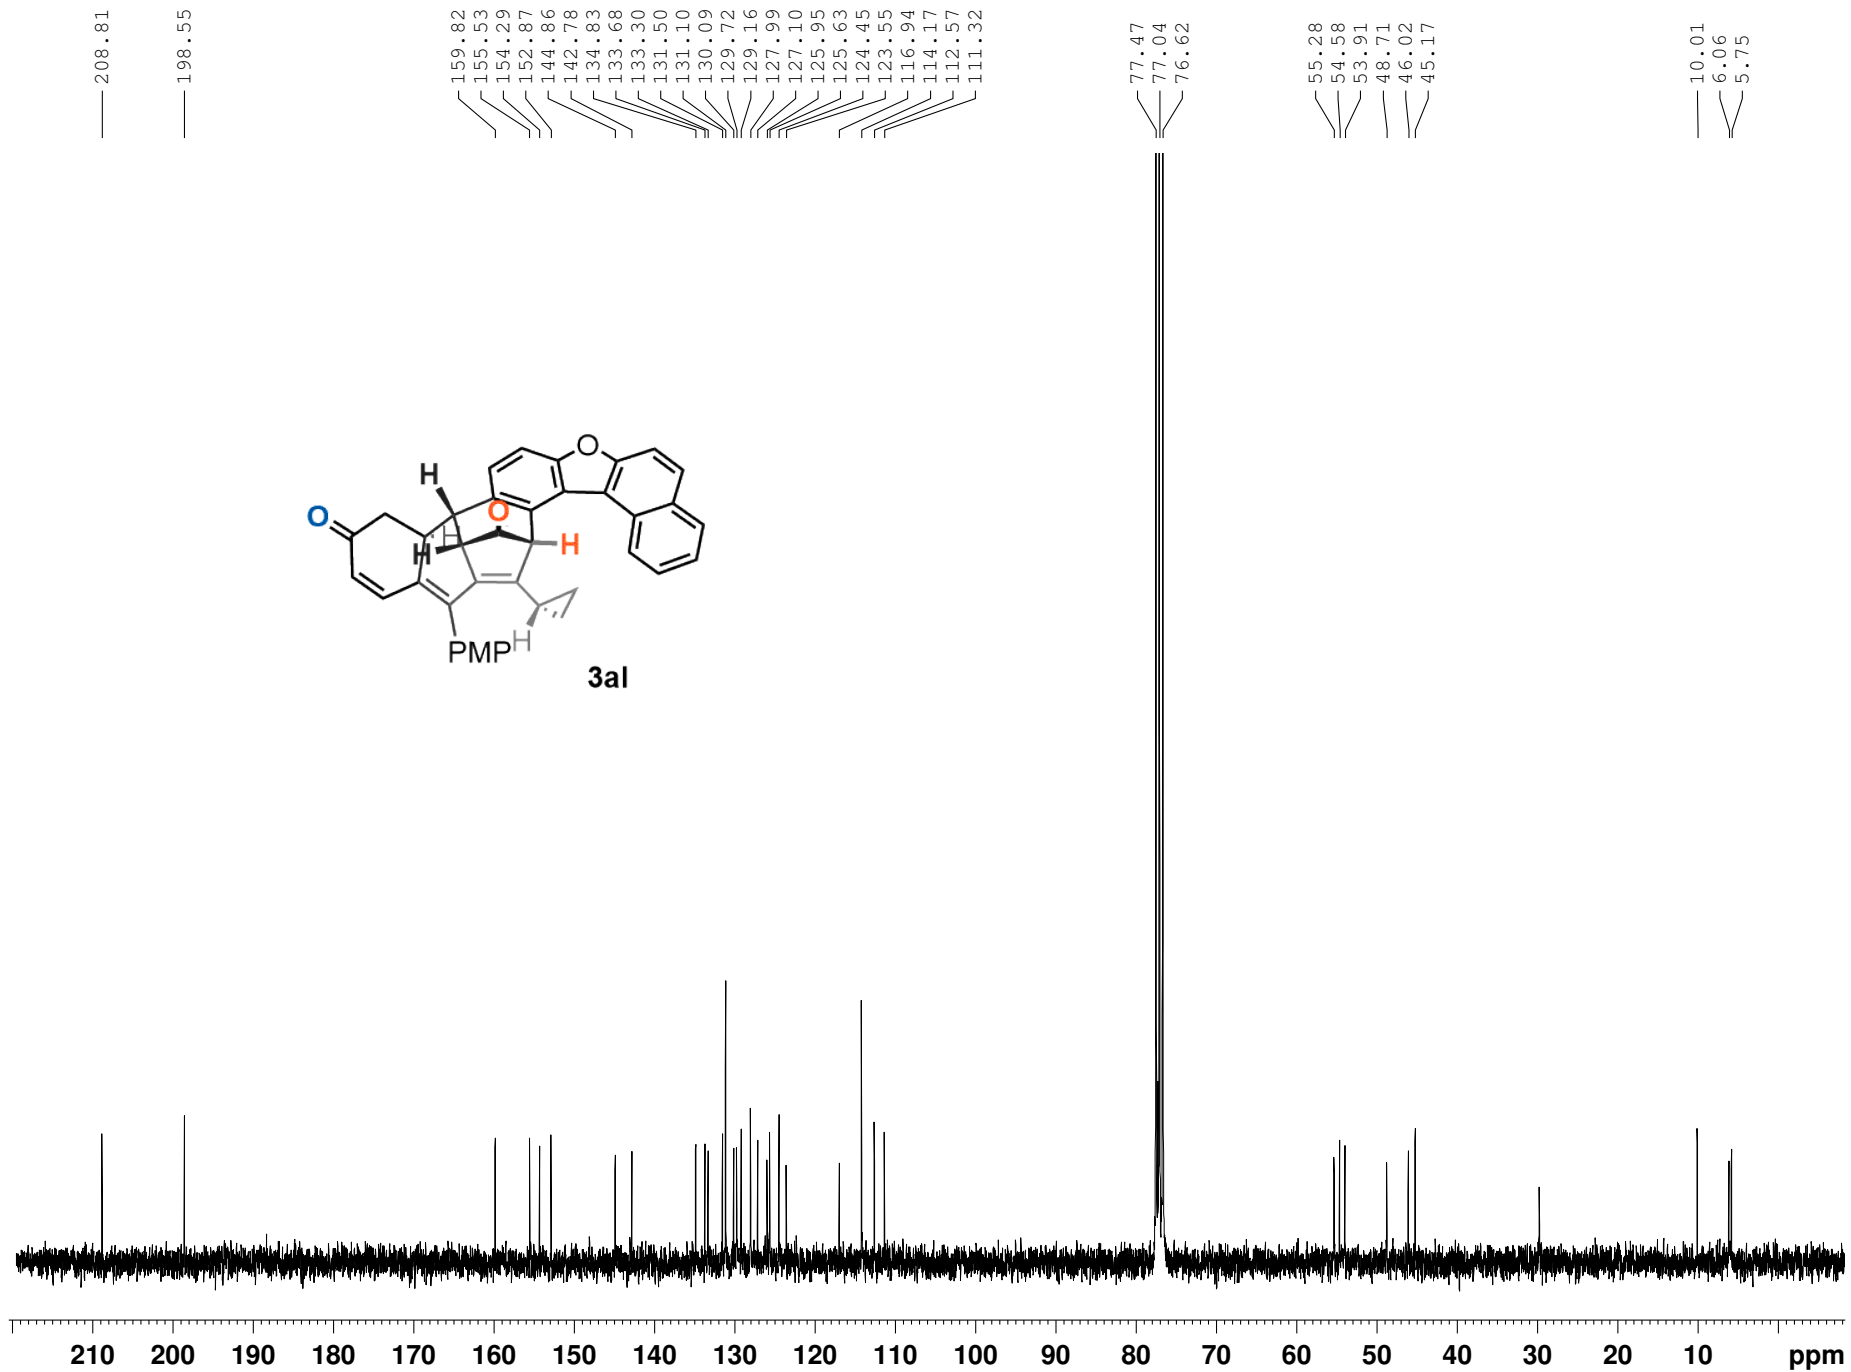

7.856  
7.829  
7.742  
7.719  
7.689  
7.667  
7.657  
7.633  
7.620  
7.588  
7.559  
7.531  
7.500  
7.352  
7.275  
7.247  
6.942  
6.914  
6.161  
6.144  
6.126  
6.108  
6.088  
6.069  
6.051  
6.019  
5.985  
5.495  
5.437  
5.370  
5.335  
4.584  
4.567  
4.535  
3.878  
3.863  
3.832  
3.811  
3.789  
3.717  
3.684  
3.651  
3.510  
3.495  
3.025  
2.992

1.824  
1.803  
0.561  
0.540  
0.495  
0.479  
0.463  
0.434  
0.046  
0.015  
-0.000  
-0.017  
-0.047  
-0.226  
-0.244  
-0.260  
-0.275  
-0.291  
-0.309  
-0.418  
-0.448  
-0.464  
-0.484  
-0.512  
-1.372  
-1.390  
-1.406  
-1.421  
-1.438  
-1.456

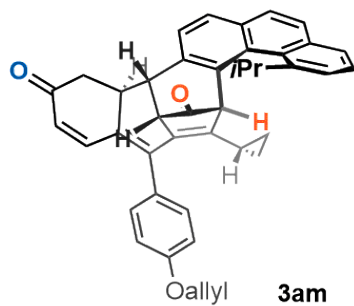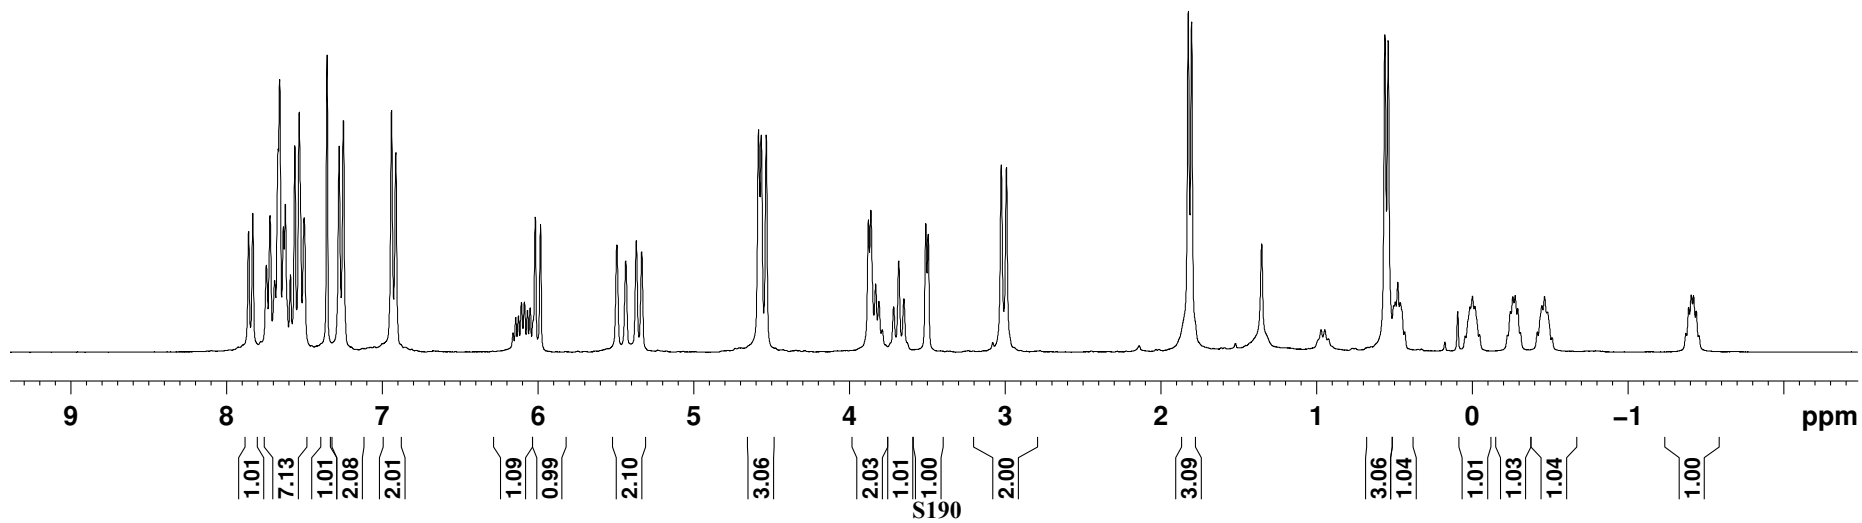

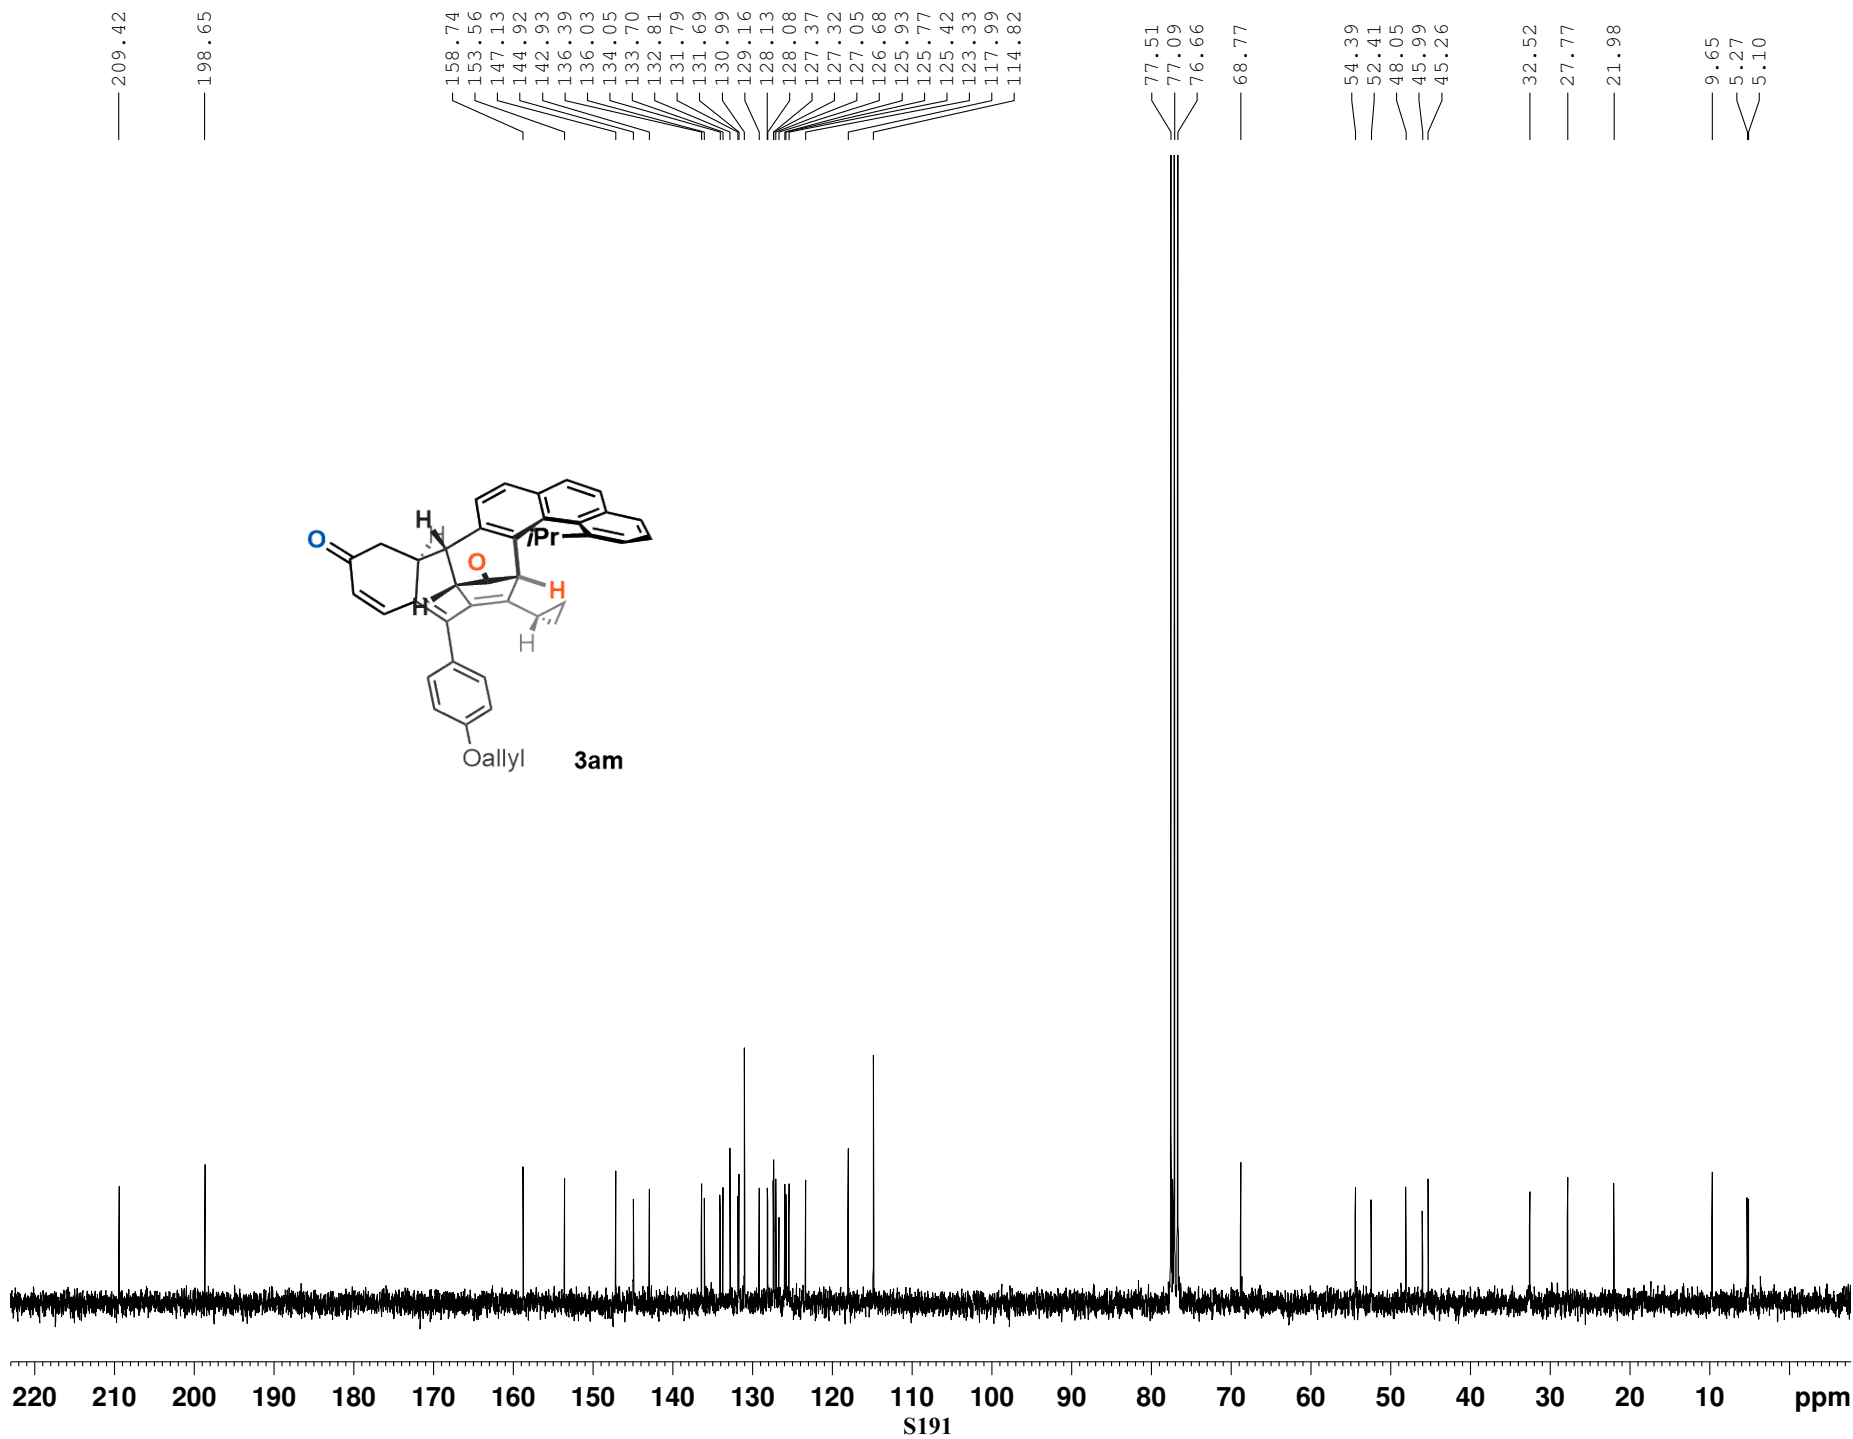



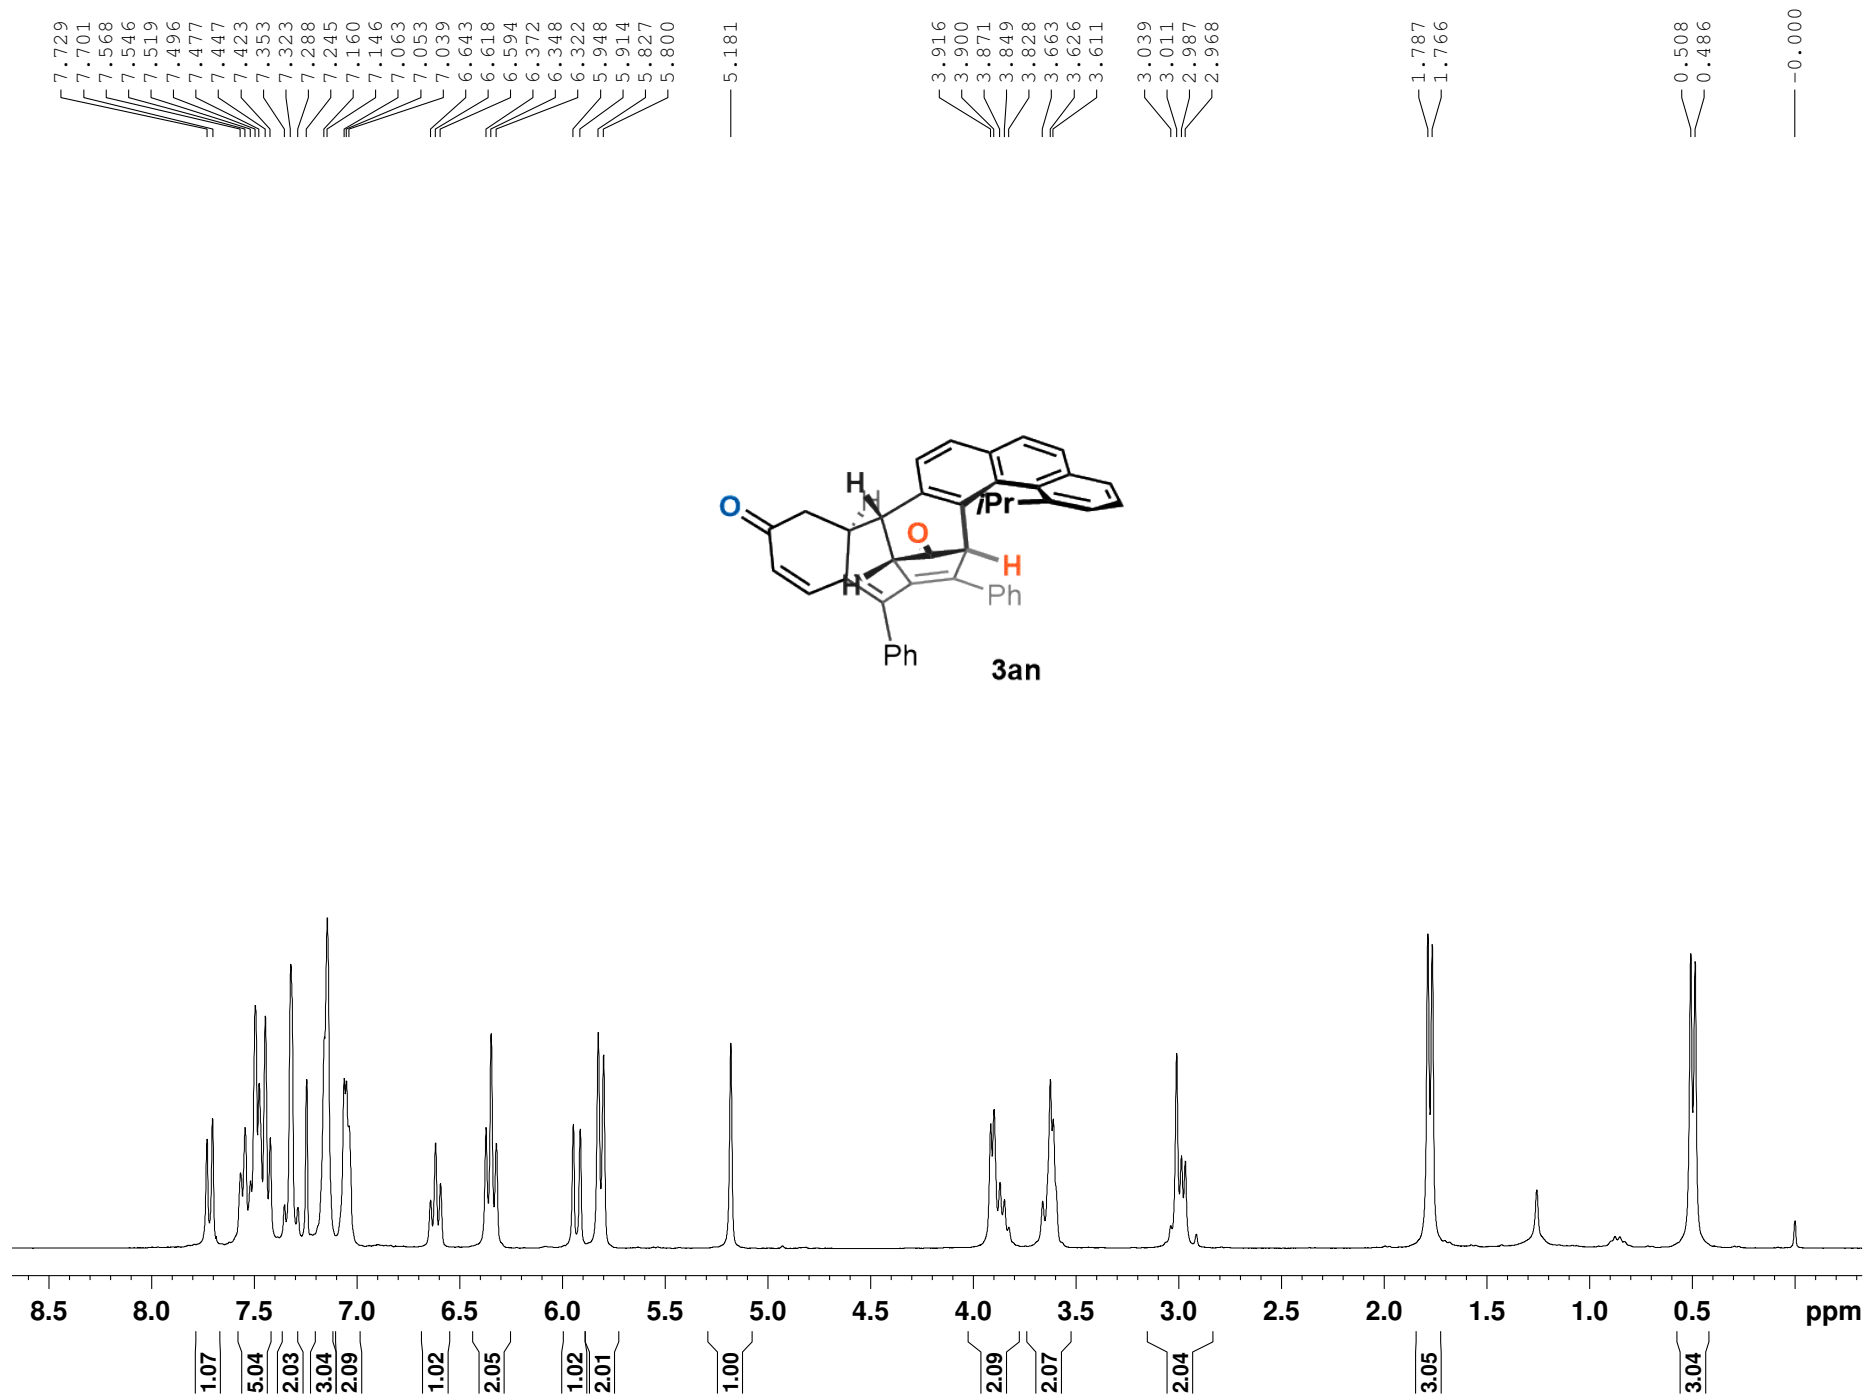

— 209.60

— 198.45

148.13  
146.79  
144.38  
143.28  
136.90  
136.16  
135.73  
134.14  
134.00  
132.24  
131.88  
129.56  
128.45  
128.32  
128.26  
127.67  
127.54  
127.32  
127.26  
127.18  
127.05  
126.84  
126.80  
125.52  
125.09  
123.33

77.56  
77.14  
76.71

56.95  
56.50

48.19  
45.77  
45.40

— 32.47

— 27.86

— 21.89

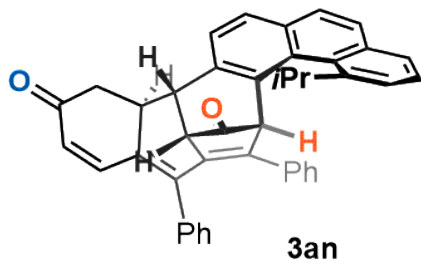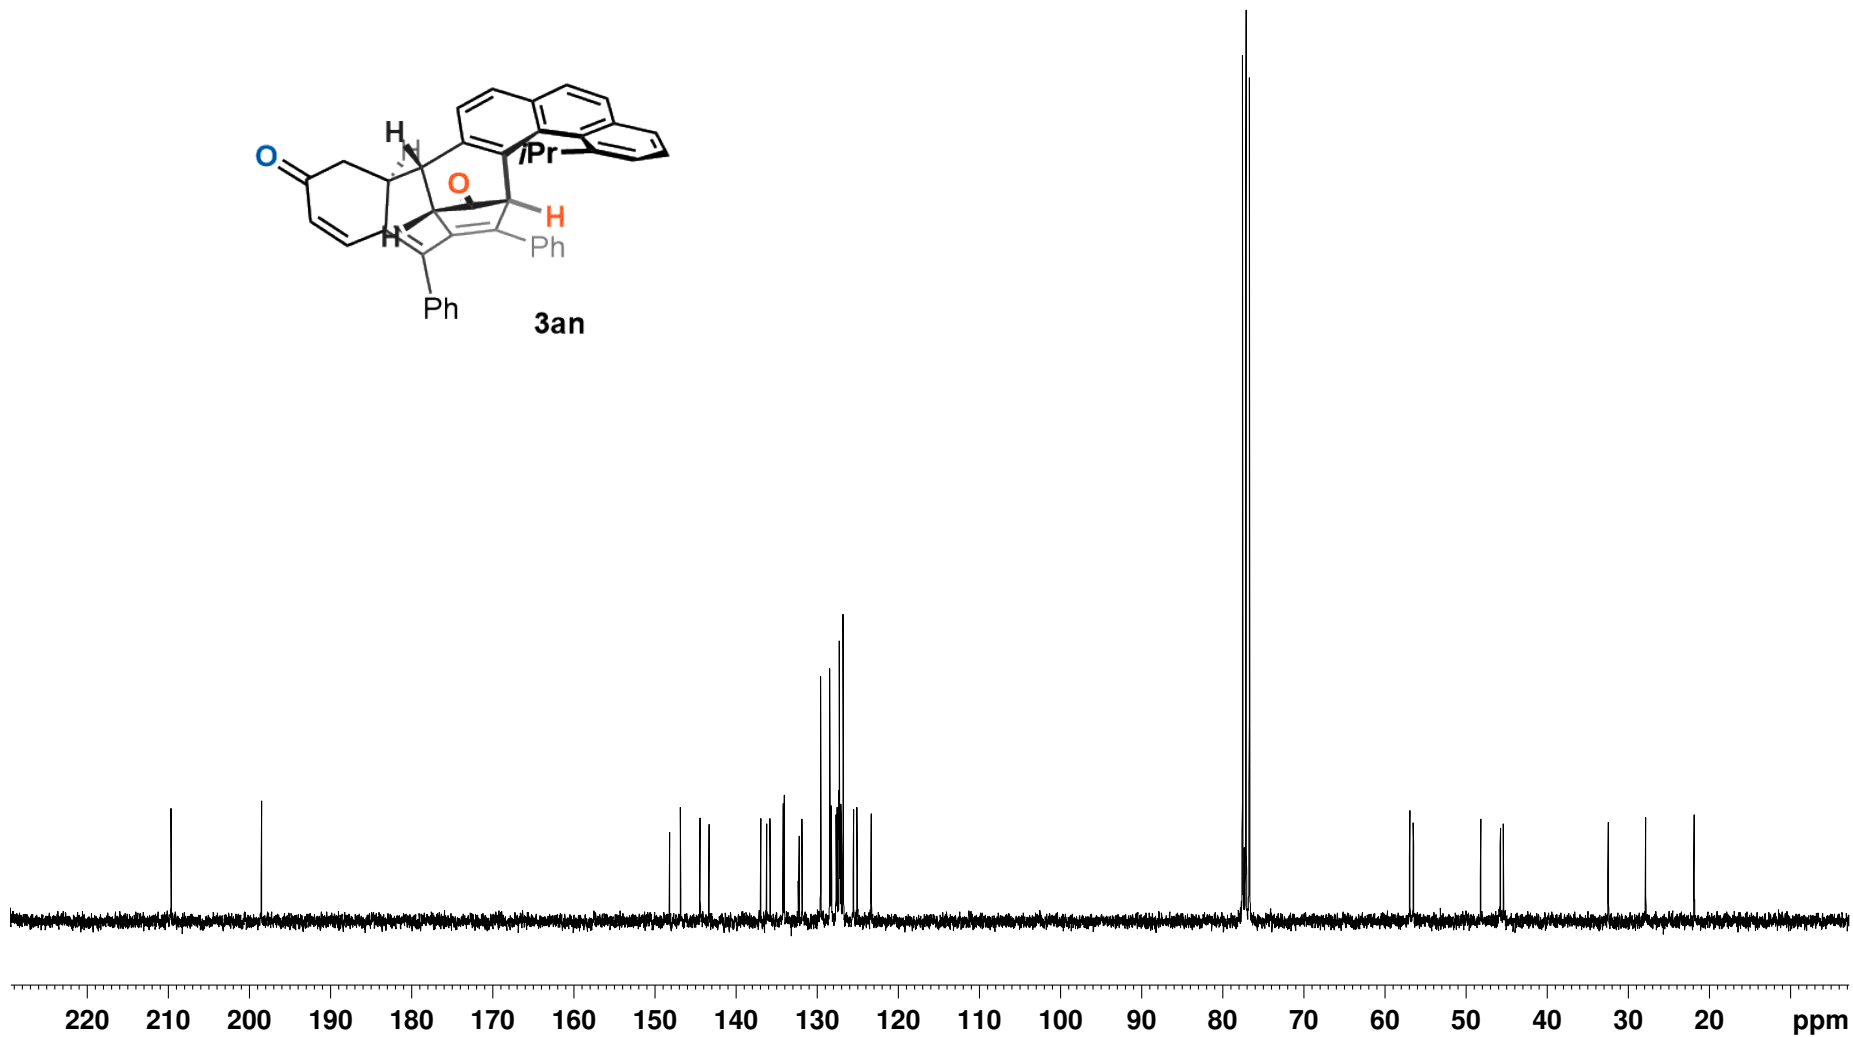

7.664  
7.569  
7.550  
7.481  
7.455  
7.405  
7.377  
7.245  
7.229  
7.220  
7.210  
7.176  
6.786  
6.758  
6.707  
6.679  
6.602  
6.574  
6.281  
6.254  
5.730  
5.698  
5.362

3.816  
3.764

1.098  
1.070  
1.055  
1.041  
1.012

0.285  
0.258  
-0.084  
-0.101  
-0.117  
-0.129  
-0.478  
-0.495  
-0.511

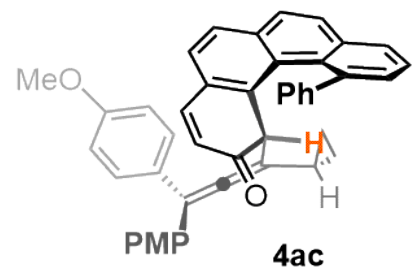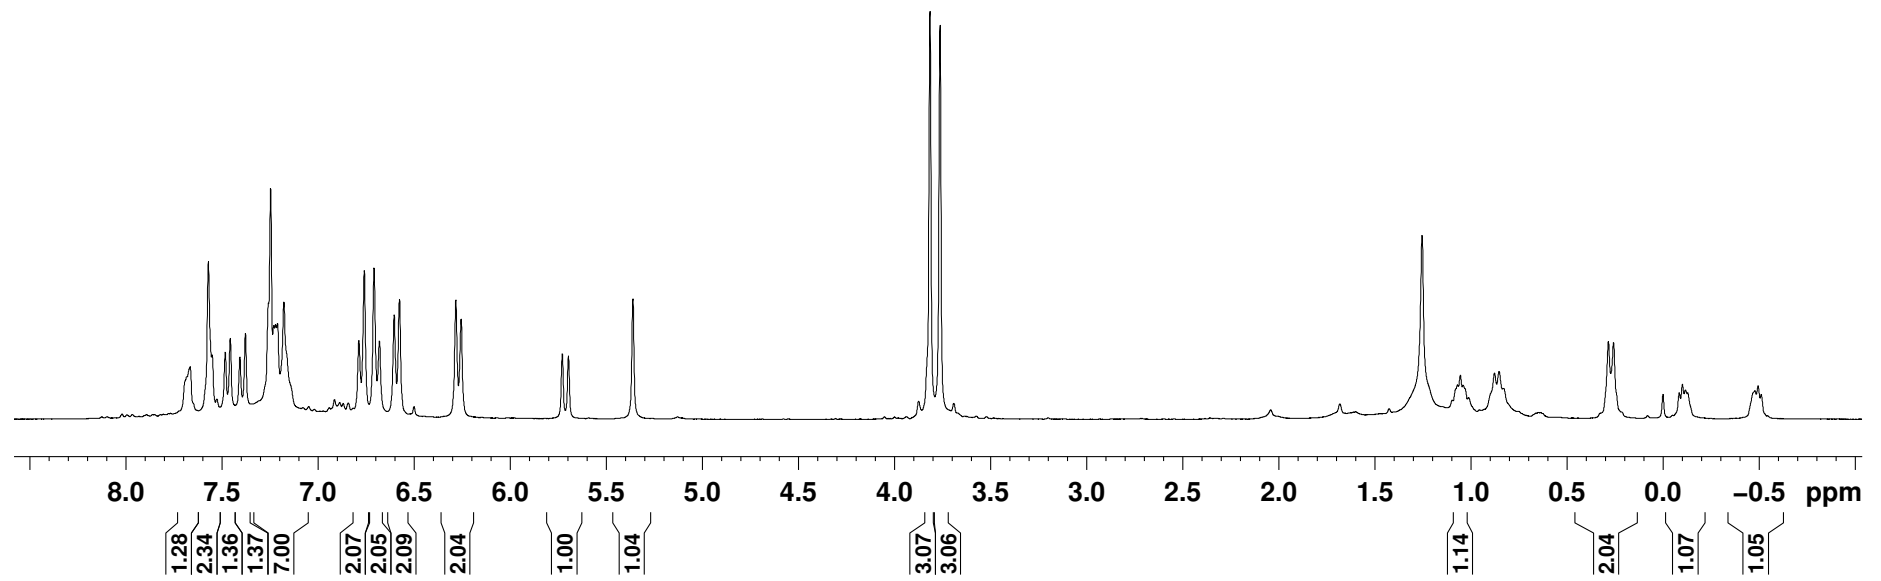

S194

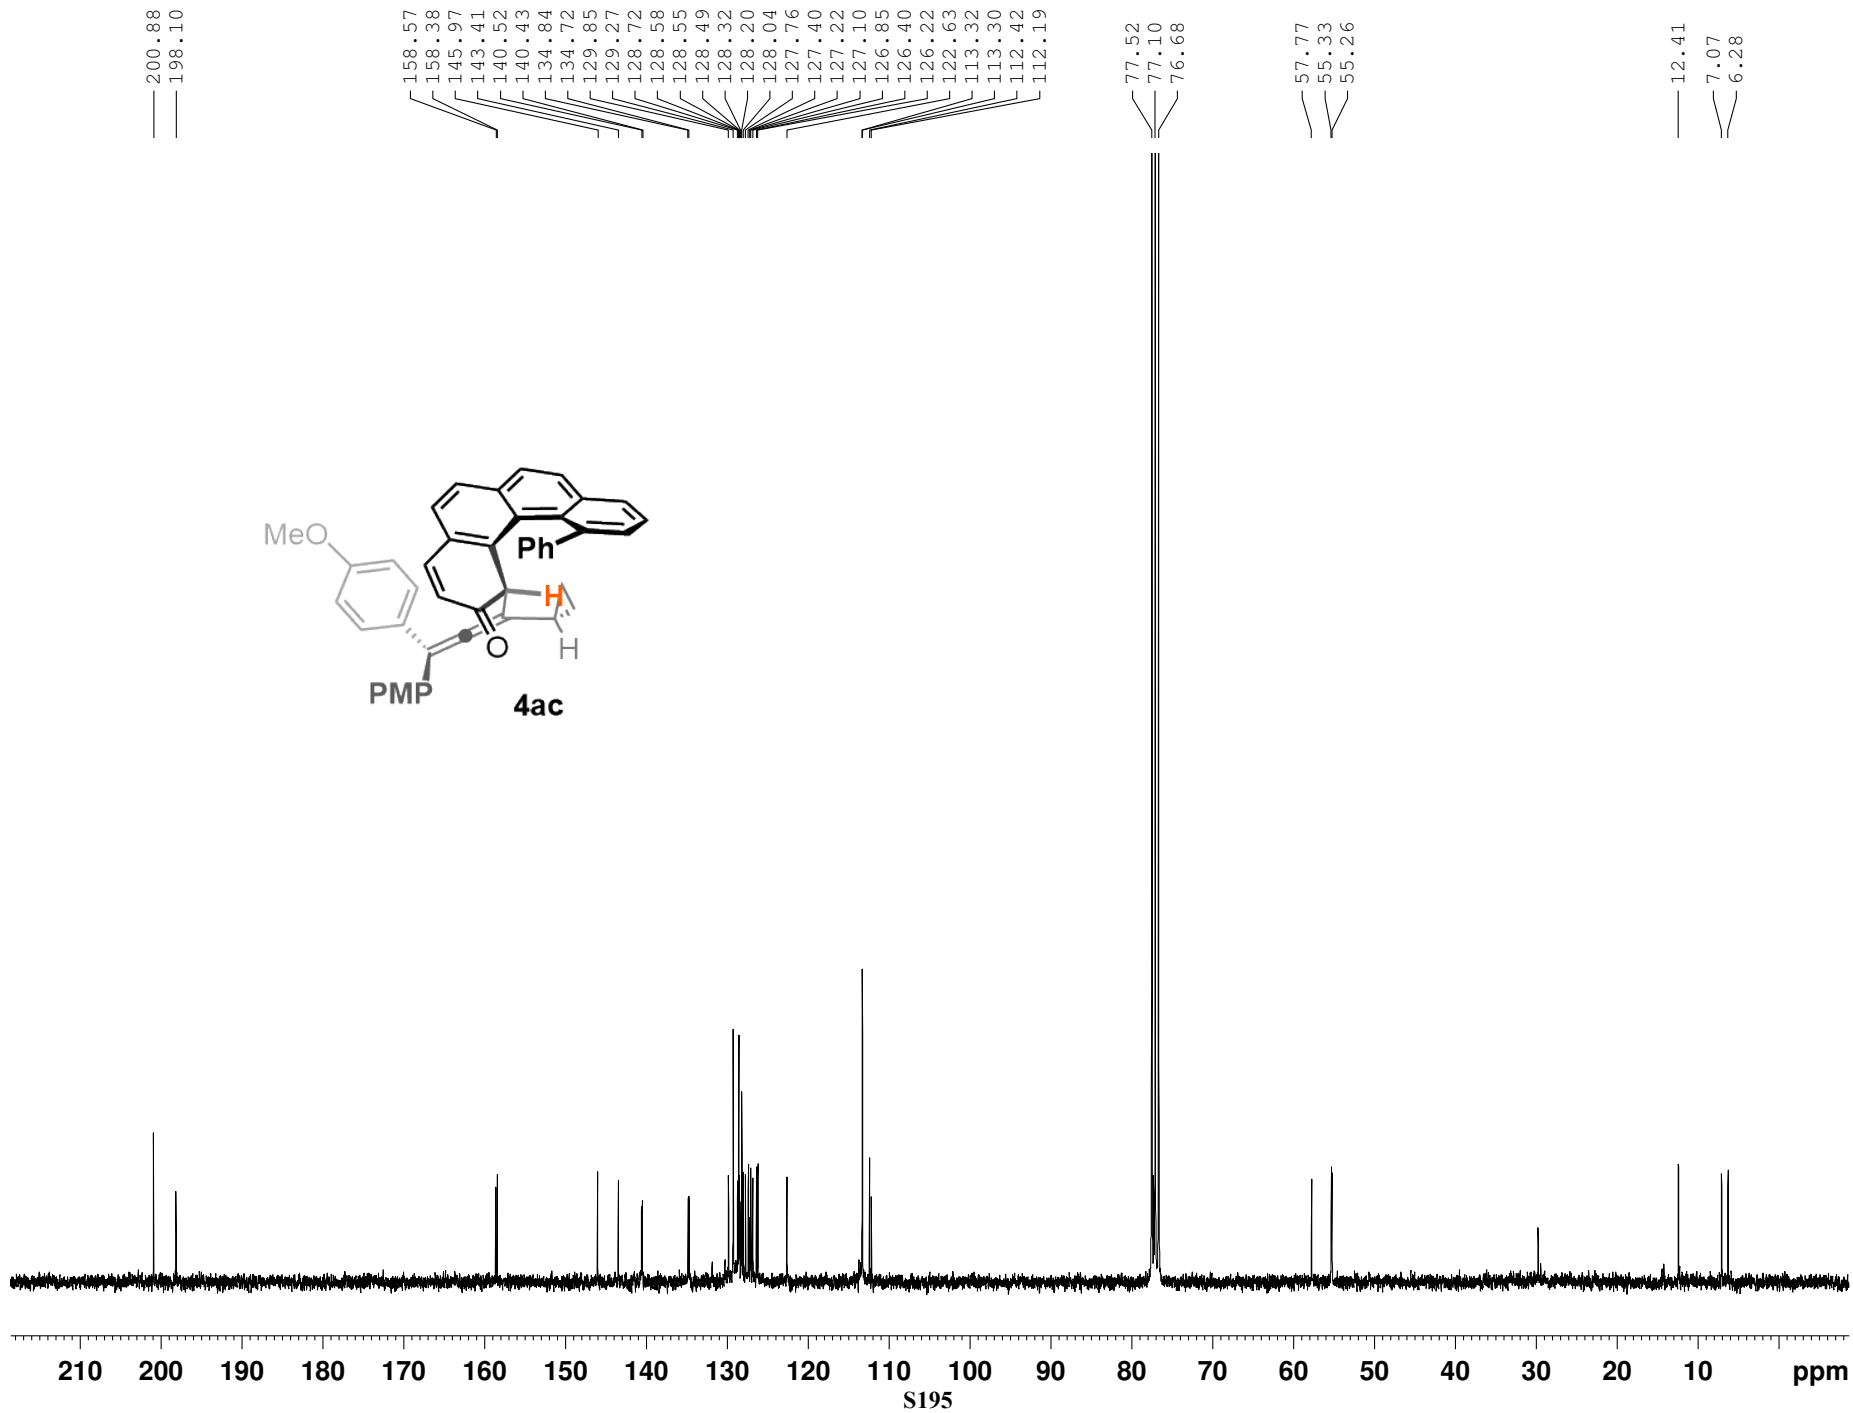

7.406  
7.377  
7.114  
7.092  
7.004  
6.978  
6.946  
6.915  
6.898  
6.870  
6.821  
6.794  
6.739  
6.713  
6.698  
6.645  
6.623  
6.601  
6.567  
6.549  
6.518  
6.417  
6.389  
6.248  
6.220  
6.136  
6.091  
6.063  
5.610  
5.577

3.917  
3.895  
3.873

3.101  
3.061  
3.025

1.812  
1.805  
1.630  
1.608

1.065  
1.018  
0.972  
0.949  
0.645  
0.621  
0.599  
0.576

0.145  
0.123  
-0.007

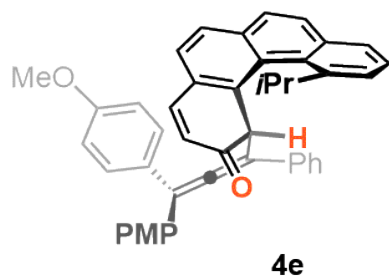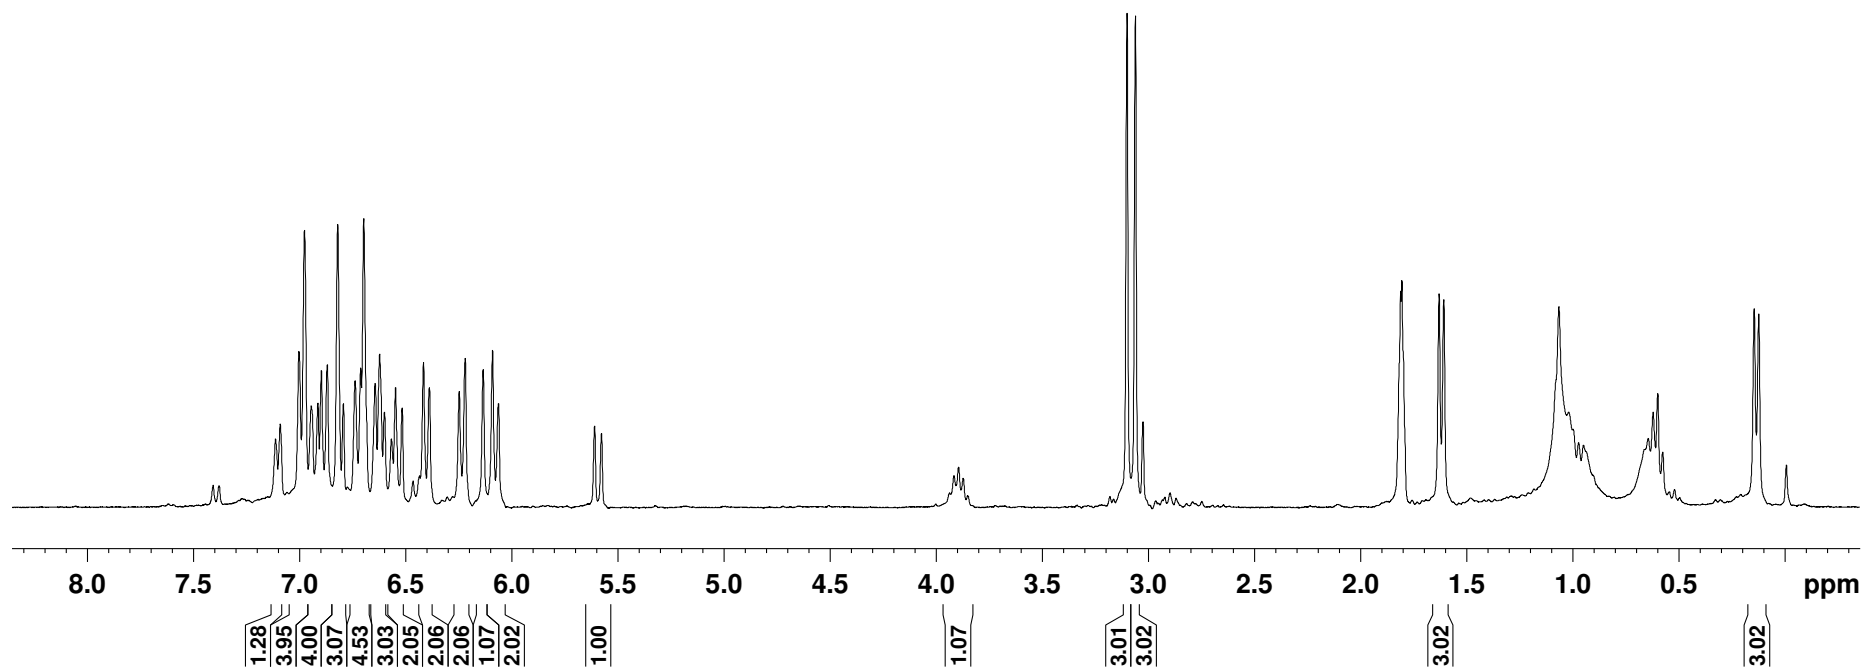

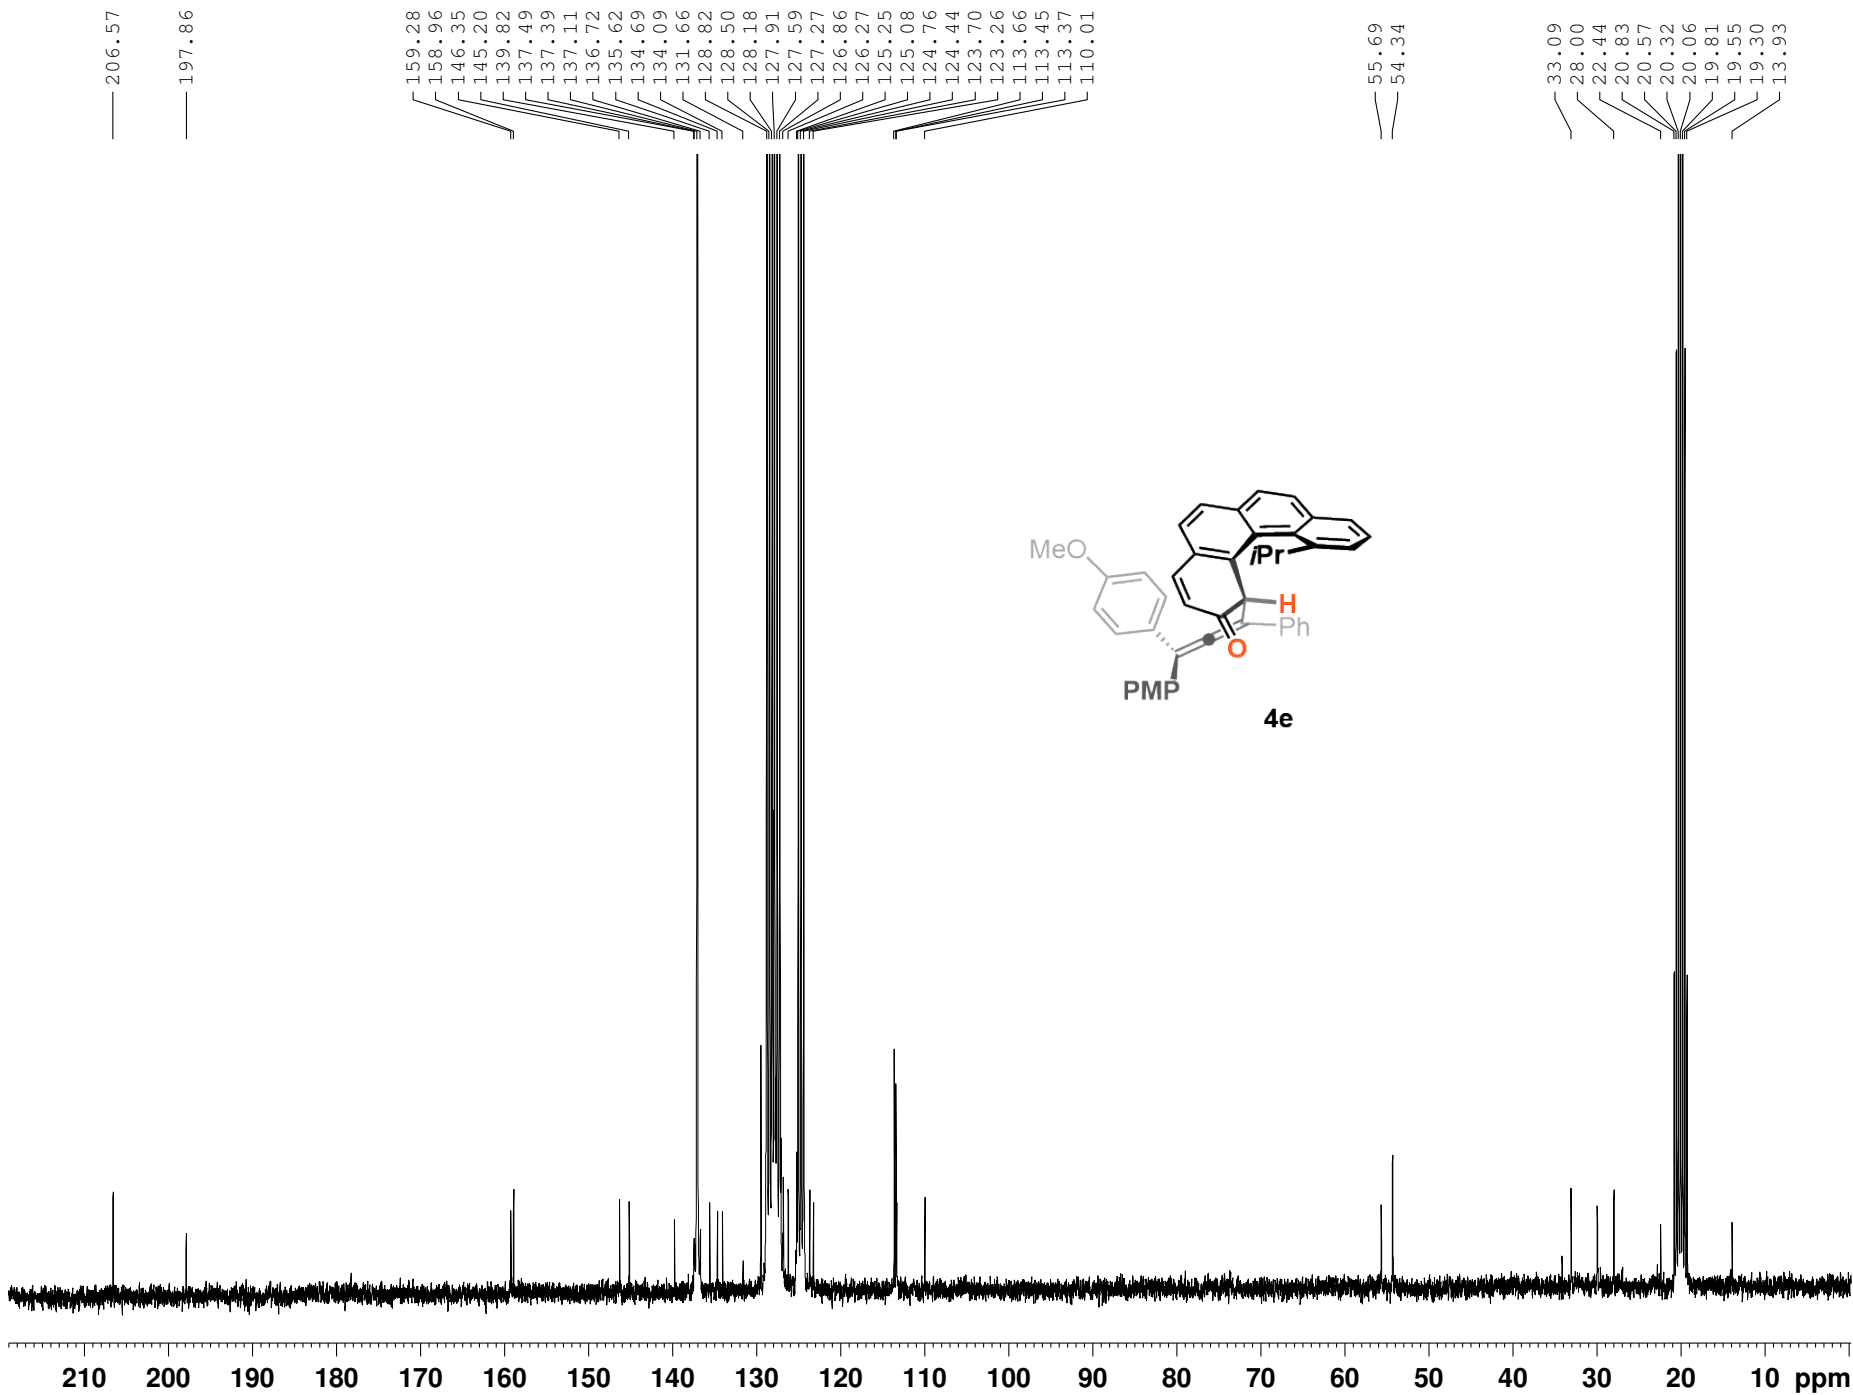

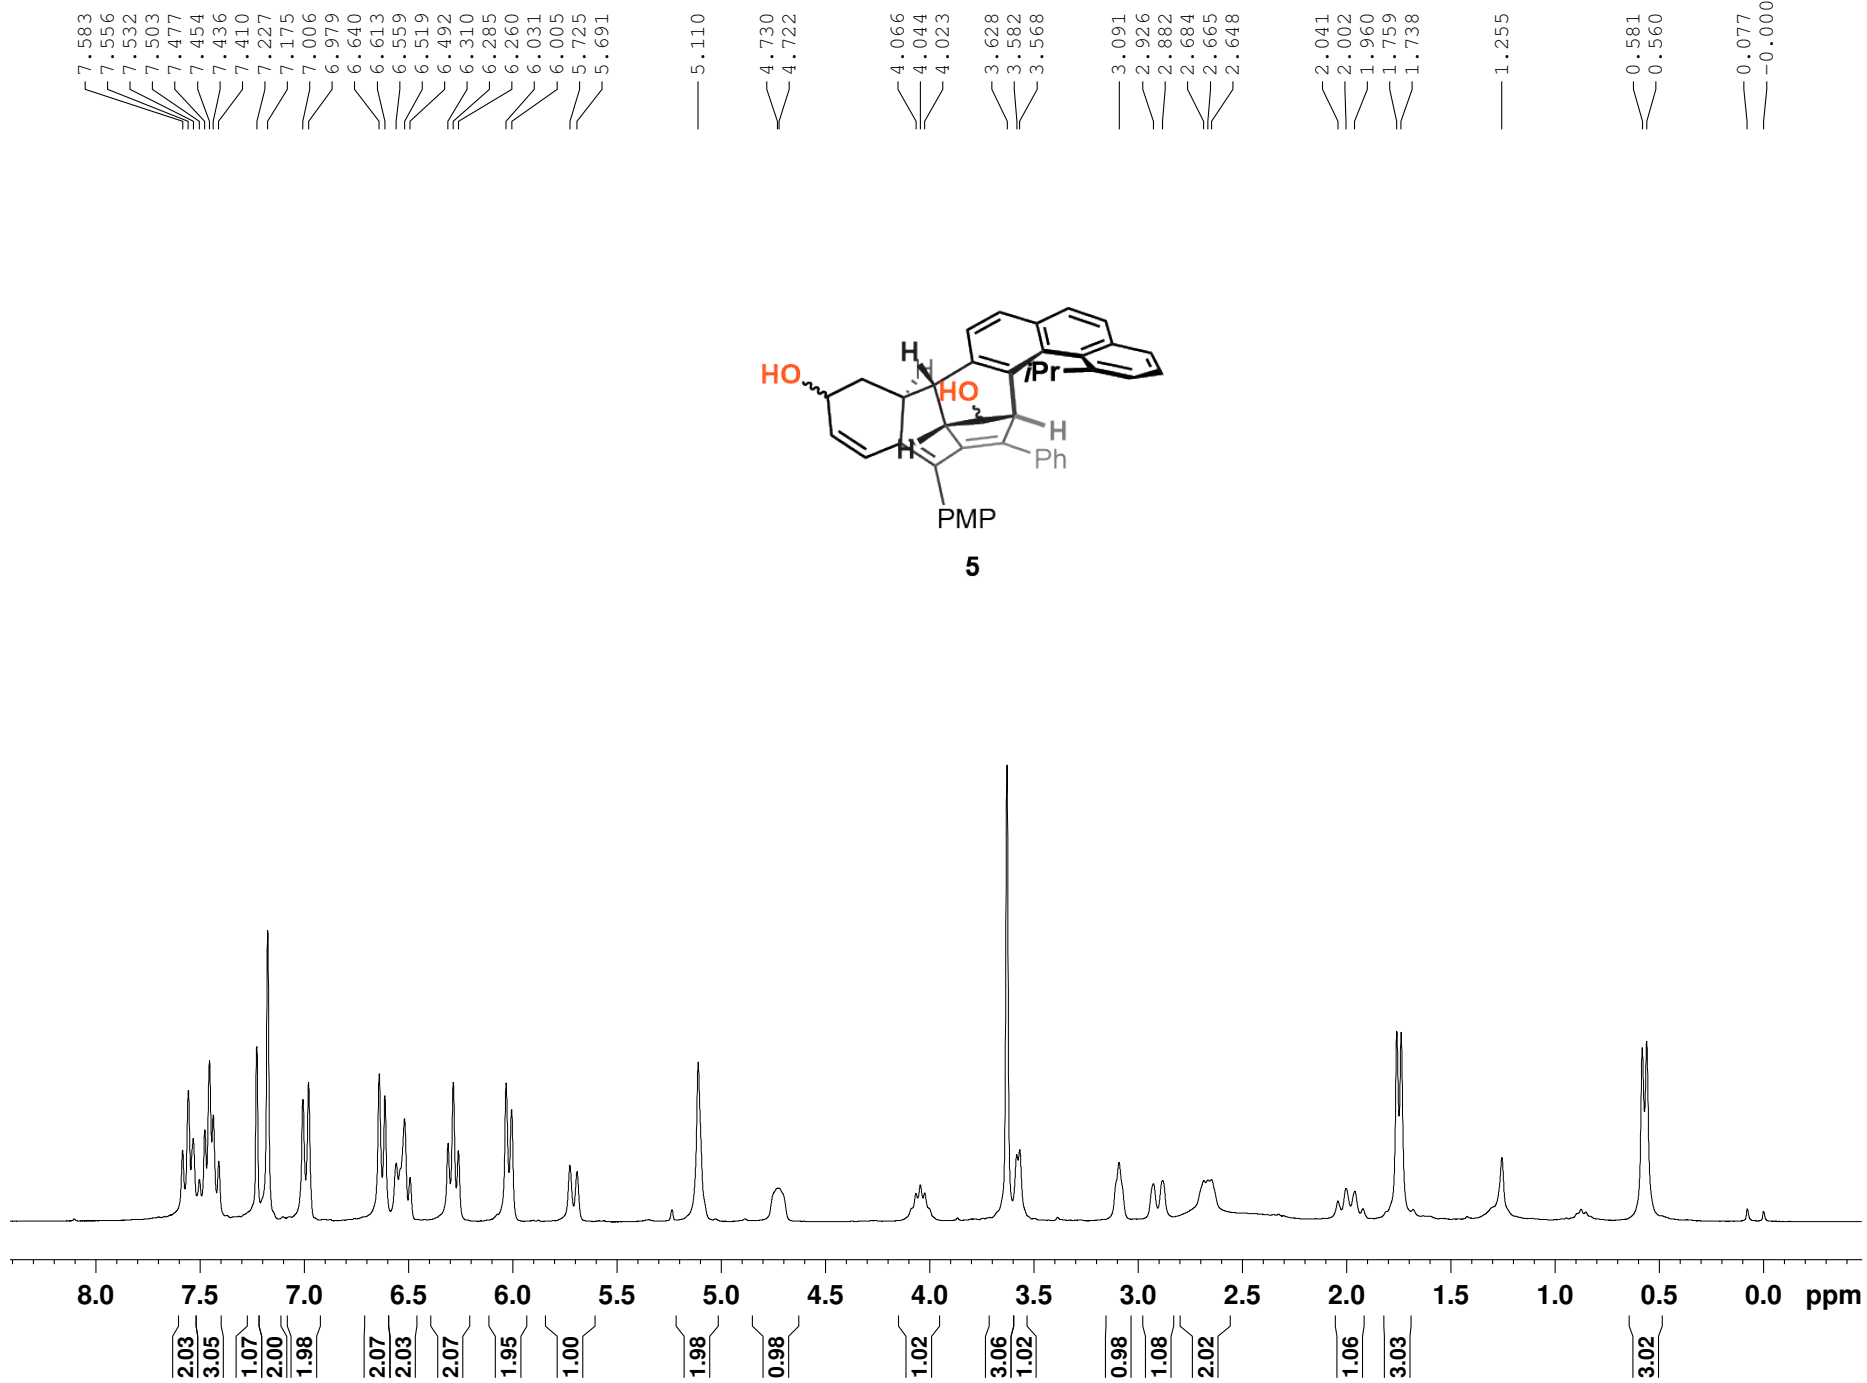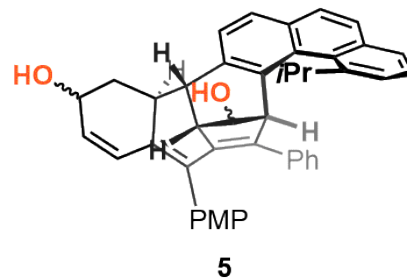

158.46  
146.97  
143.54  
138.29  
135.75  
134.10  
134.03  
133.56  
133.14  
132.98  
131.94  
130.74  
130.08  
129.47  
127.79  
127.61  
127.32  
127.08  
126.59  
126.49  
126.42  
126.15  
126.05  
125.76  
125.01  
123.05  
113.40

77.52  
77.30  
77.10  
76.67  
71.62  
69.01

55.11  
52.14  
51.06

43.72  
42.13  
39.88

32.12  
28.06

21.31

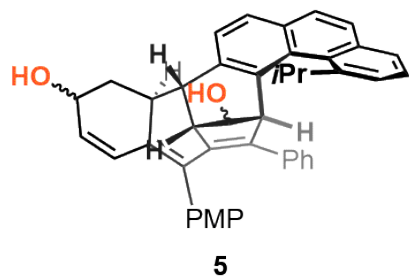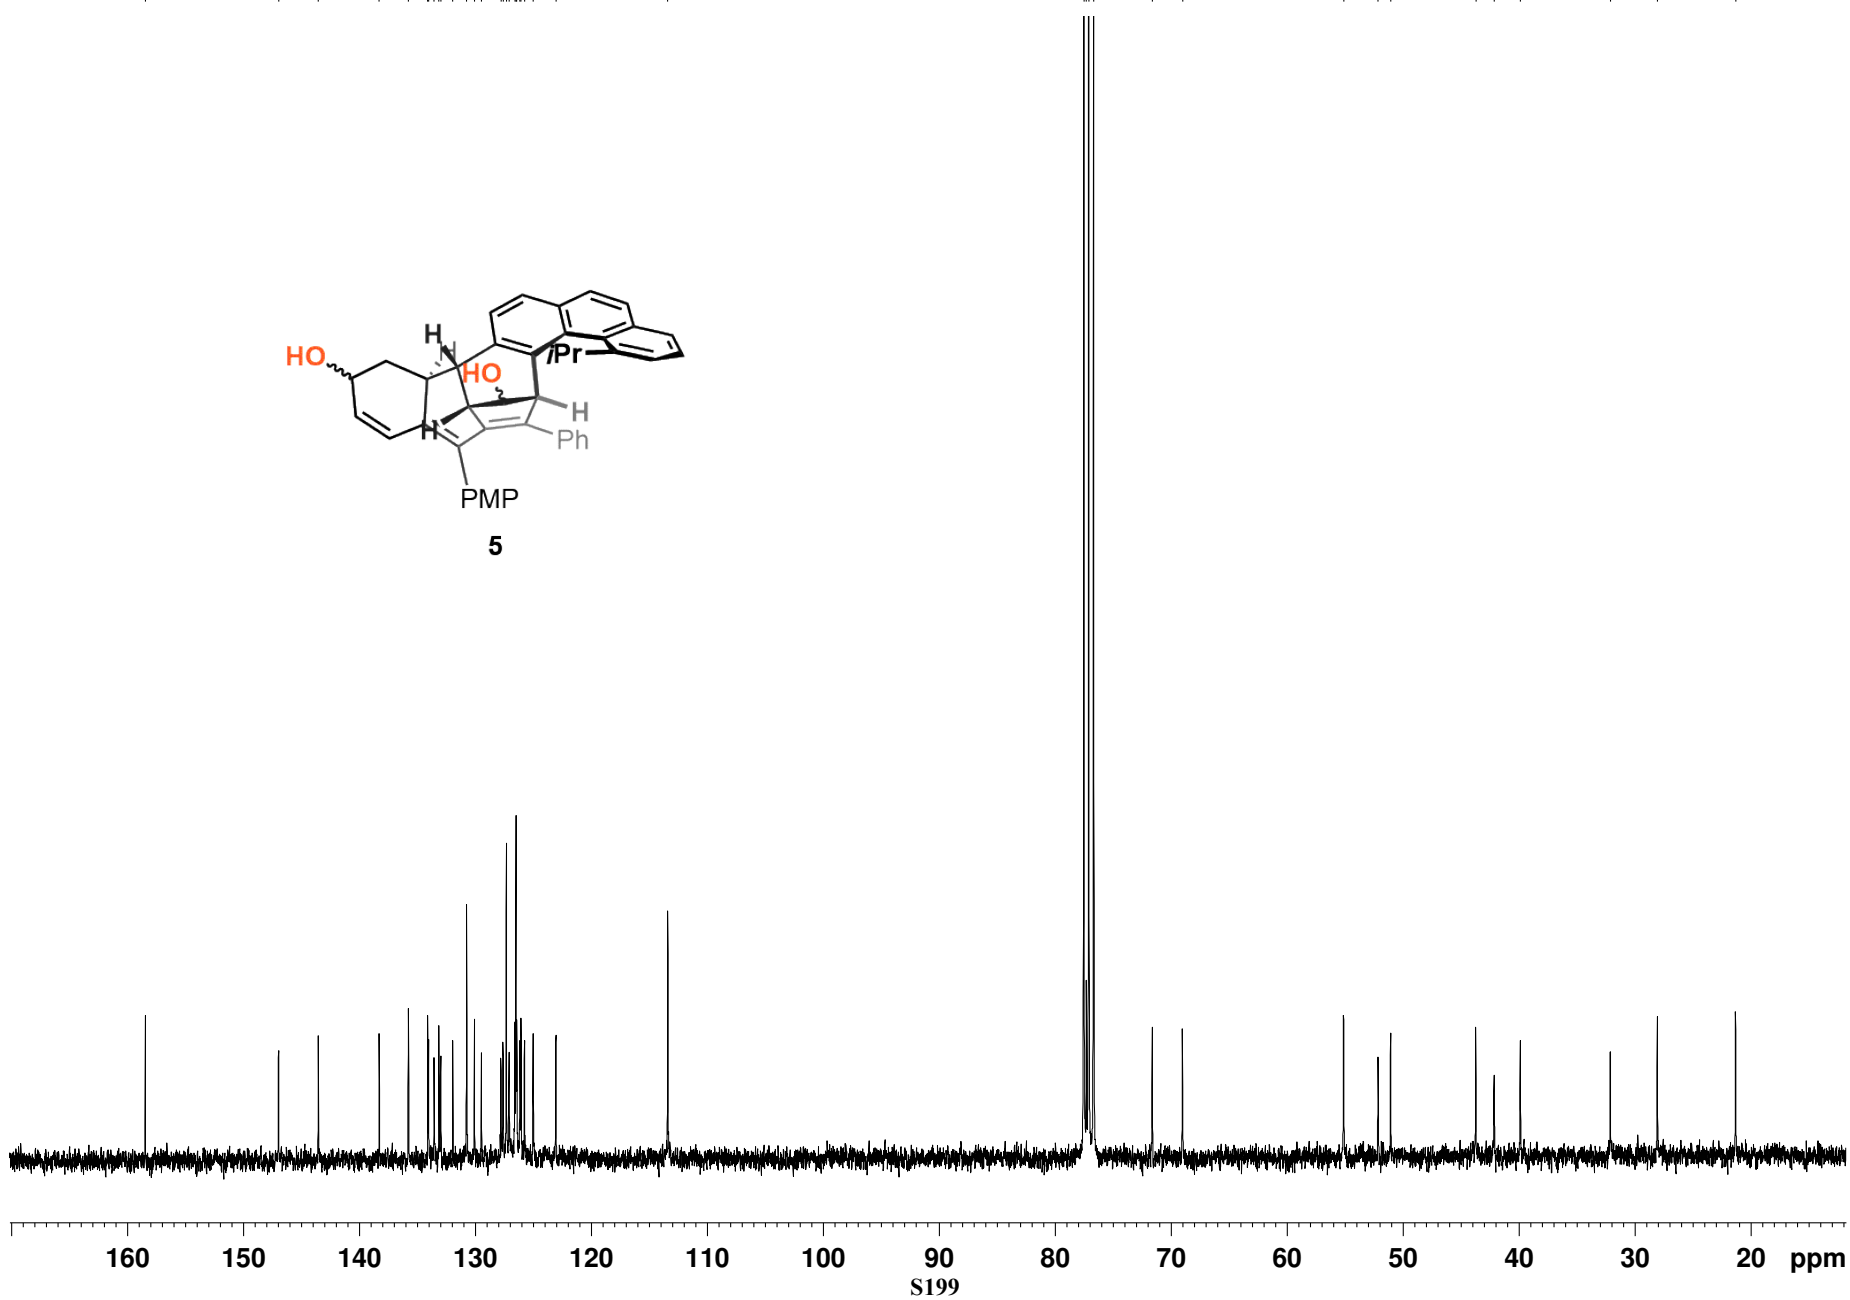



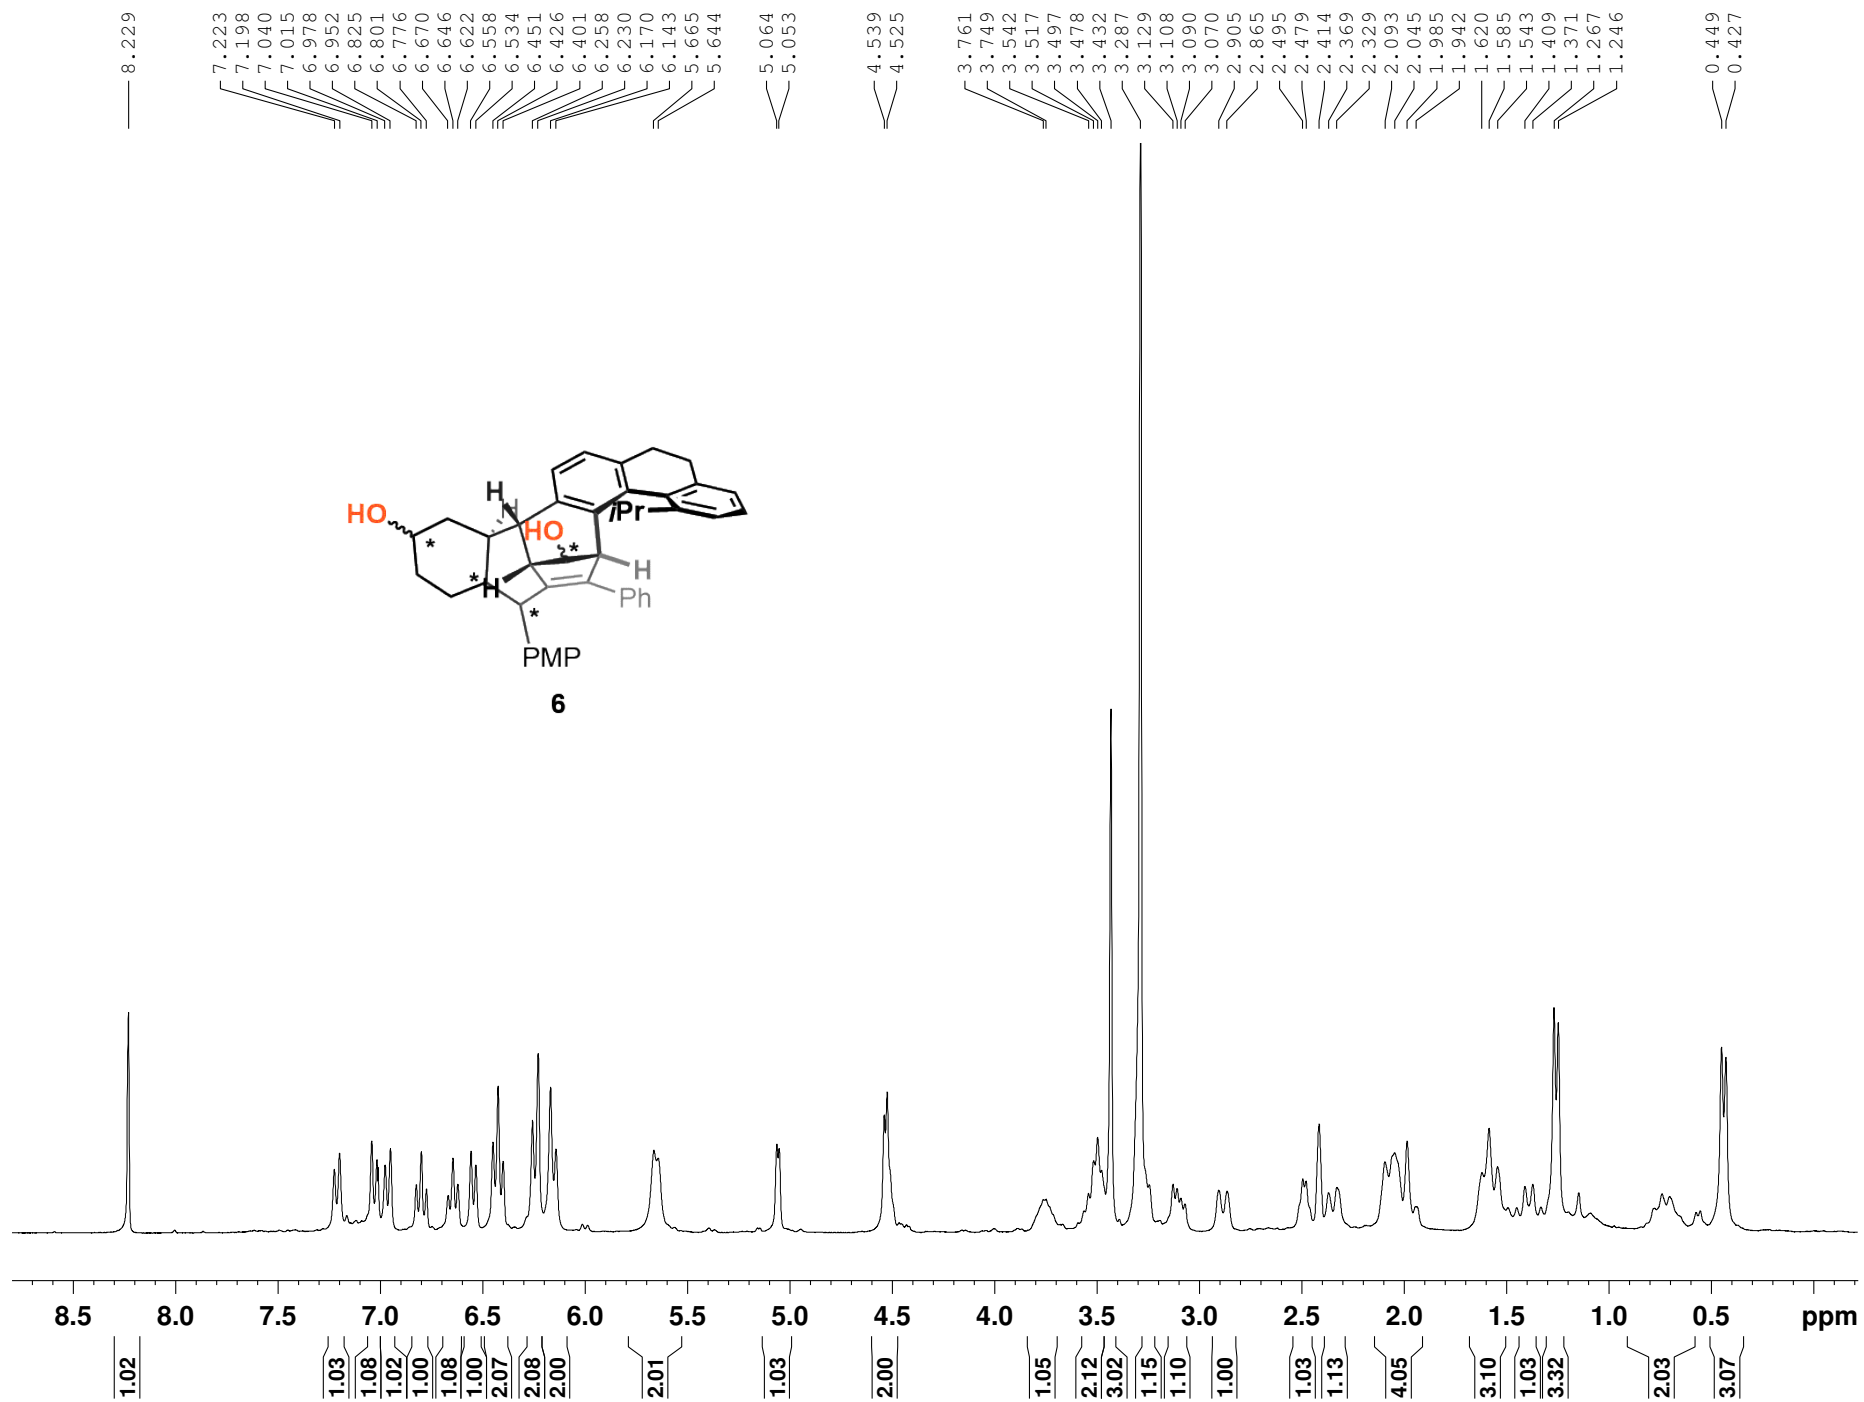

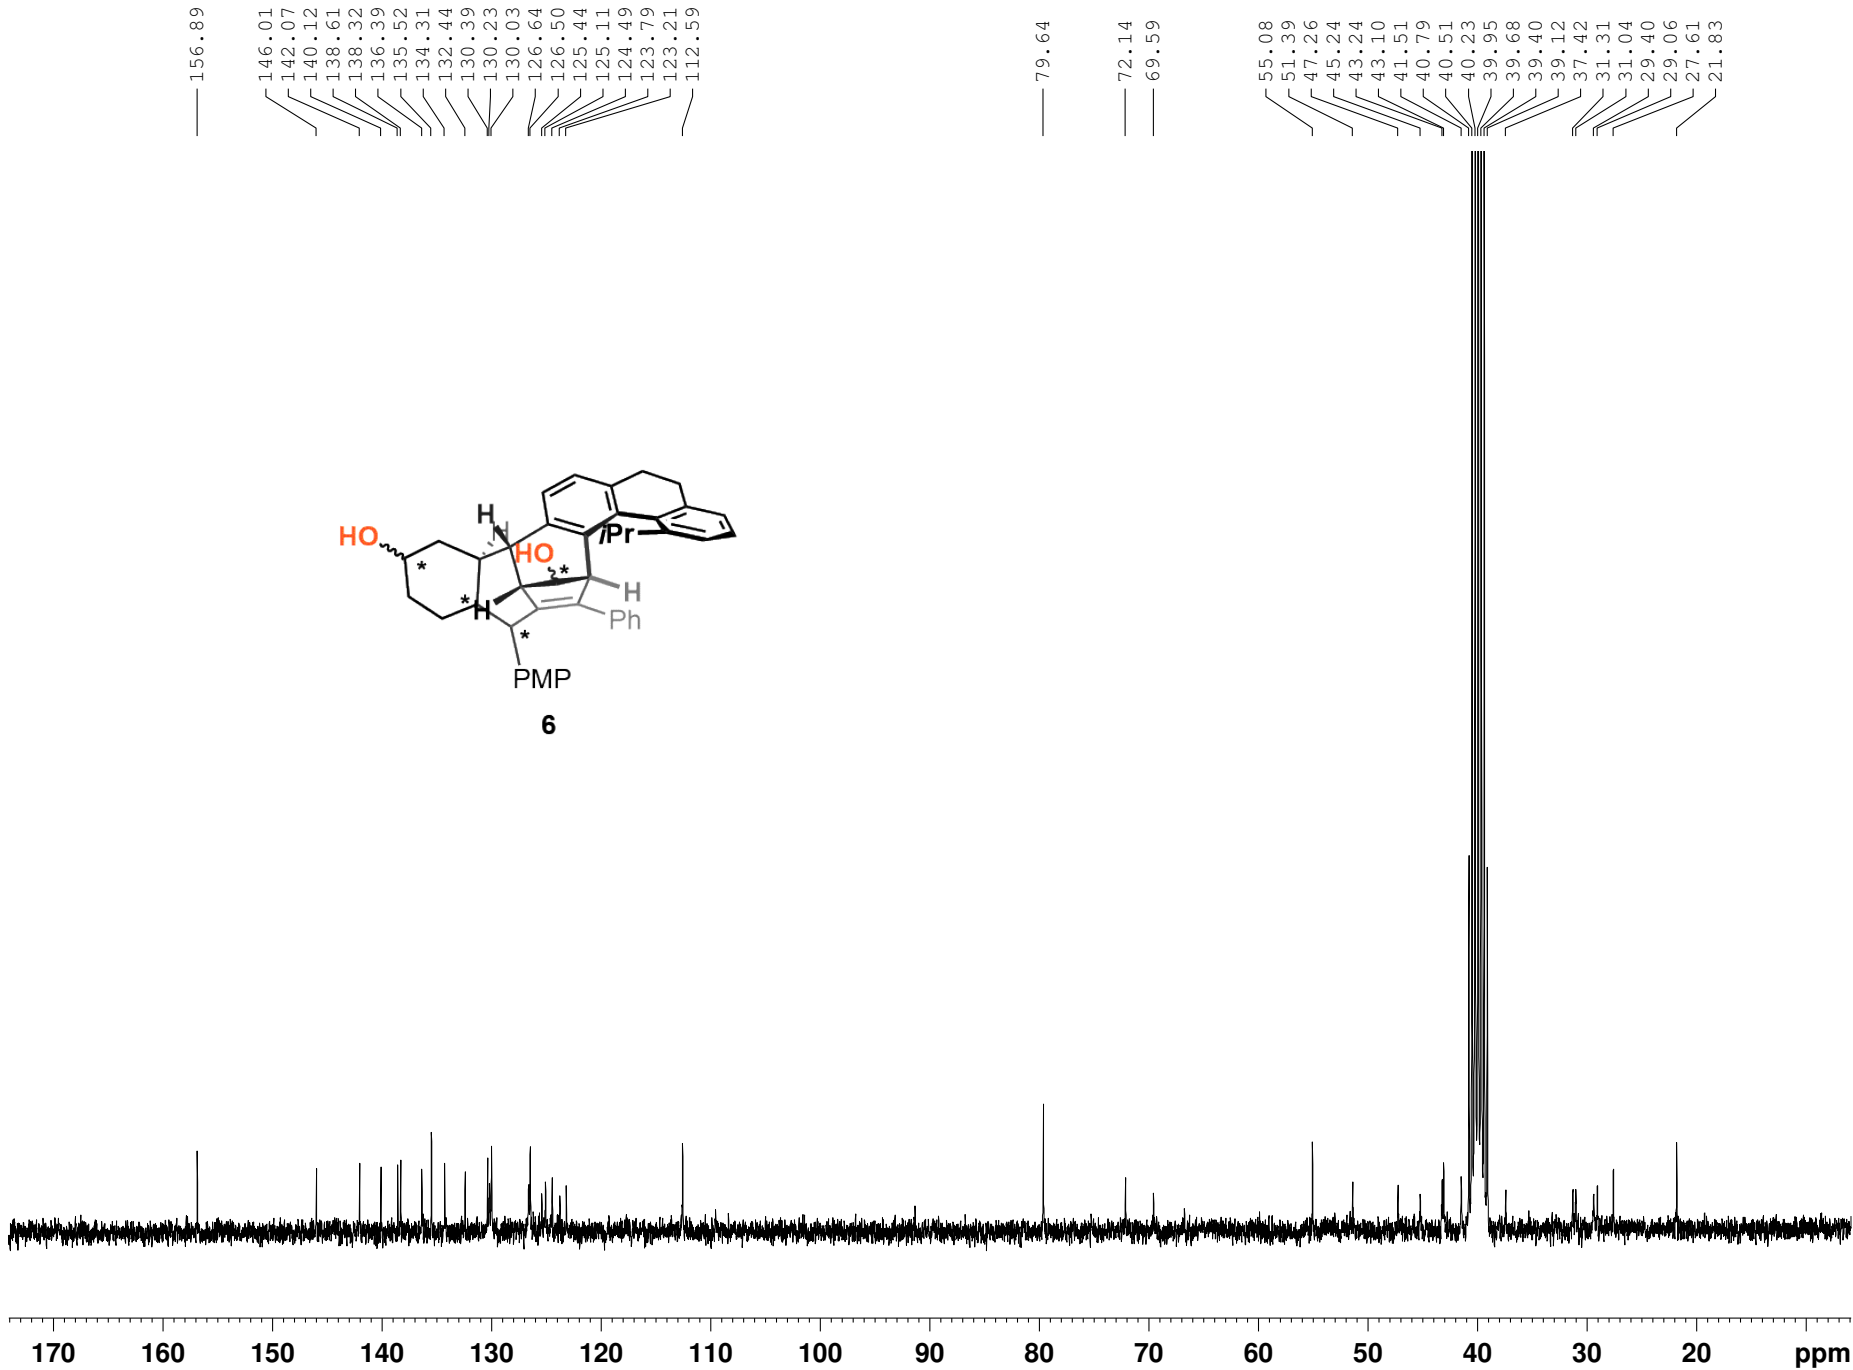

7.311  
7.286  
7.250  
7.230  
7.197  
7.172  
7.081  
7.055  
6.972  
6.947  
6.922  
6.813  
6.789  
6.765  
6.680  
6.656  
6.624  
6.599  
6.574  
6.570  
6.531  
5.616  
5.600  
5.141  
5.119  
5.105  
5.090  
5.068  
3.786  
3.768  
3.751  
3.595  
3.471  
3.452  
3.432  
3.412  
3.388  
3.366  
3.246  
3.207  
3.187  
3.080  
3.040  
3.027  
3.008  
2.492  
2.447  
2.379  
2.335  
2.299  
2.244  
2.188  
2.159  
2.107  
2.032  
1.848  
1.818  
1.782  
1.769  
1.727  
1.692  
1.650  
1.611  
1.375  
1.302  
1.280  
1.251  
1.170  
1.128  
1.088  
1.051  
0.873  
0.849  
0.824  
0.680  
0.658  
0.067  
-0.005

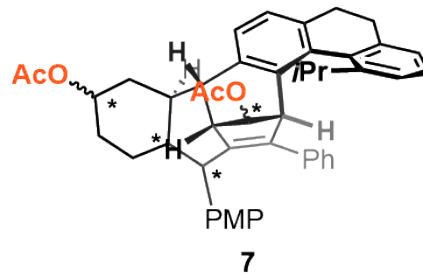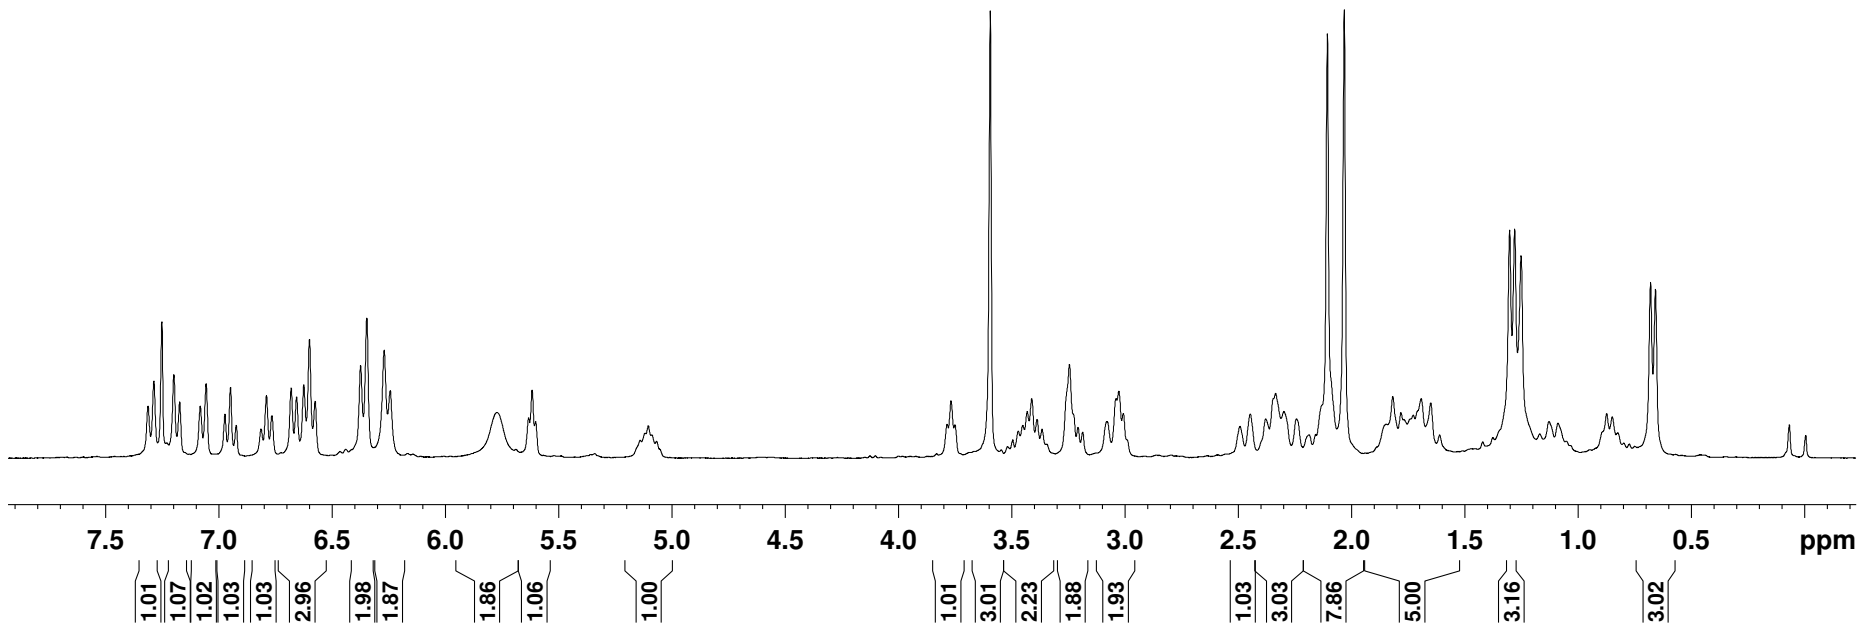

S202

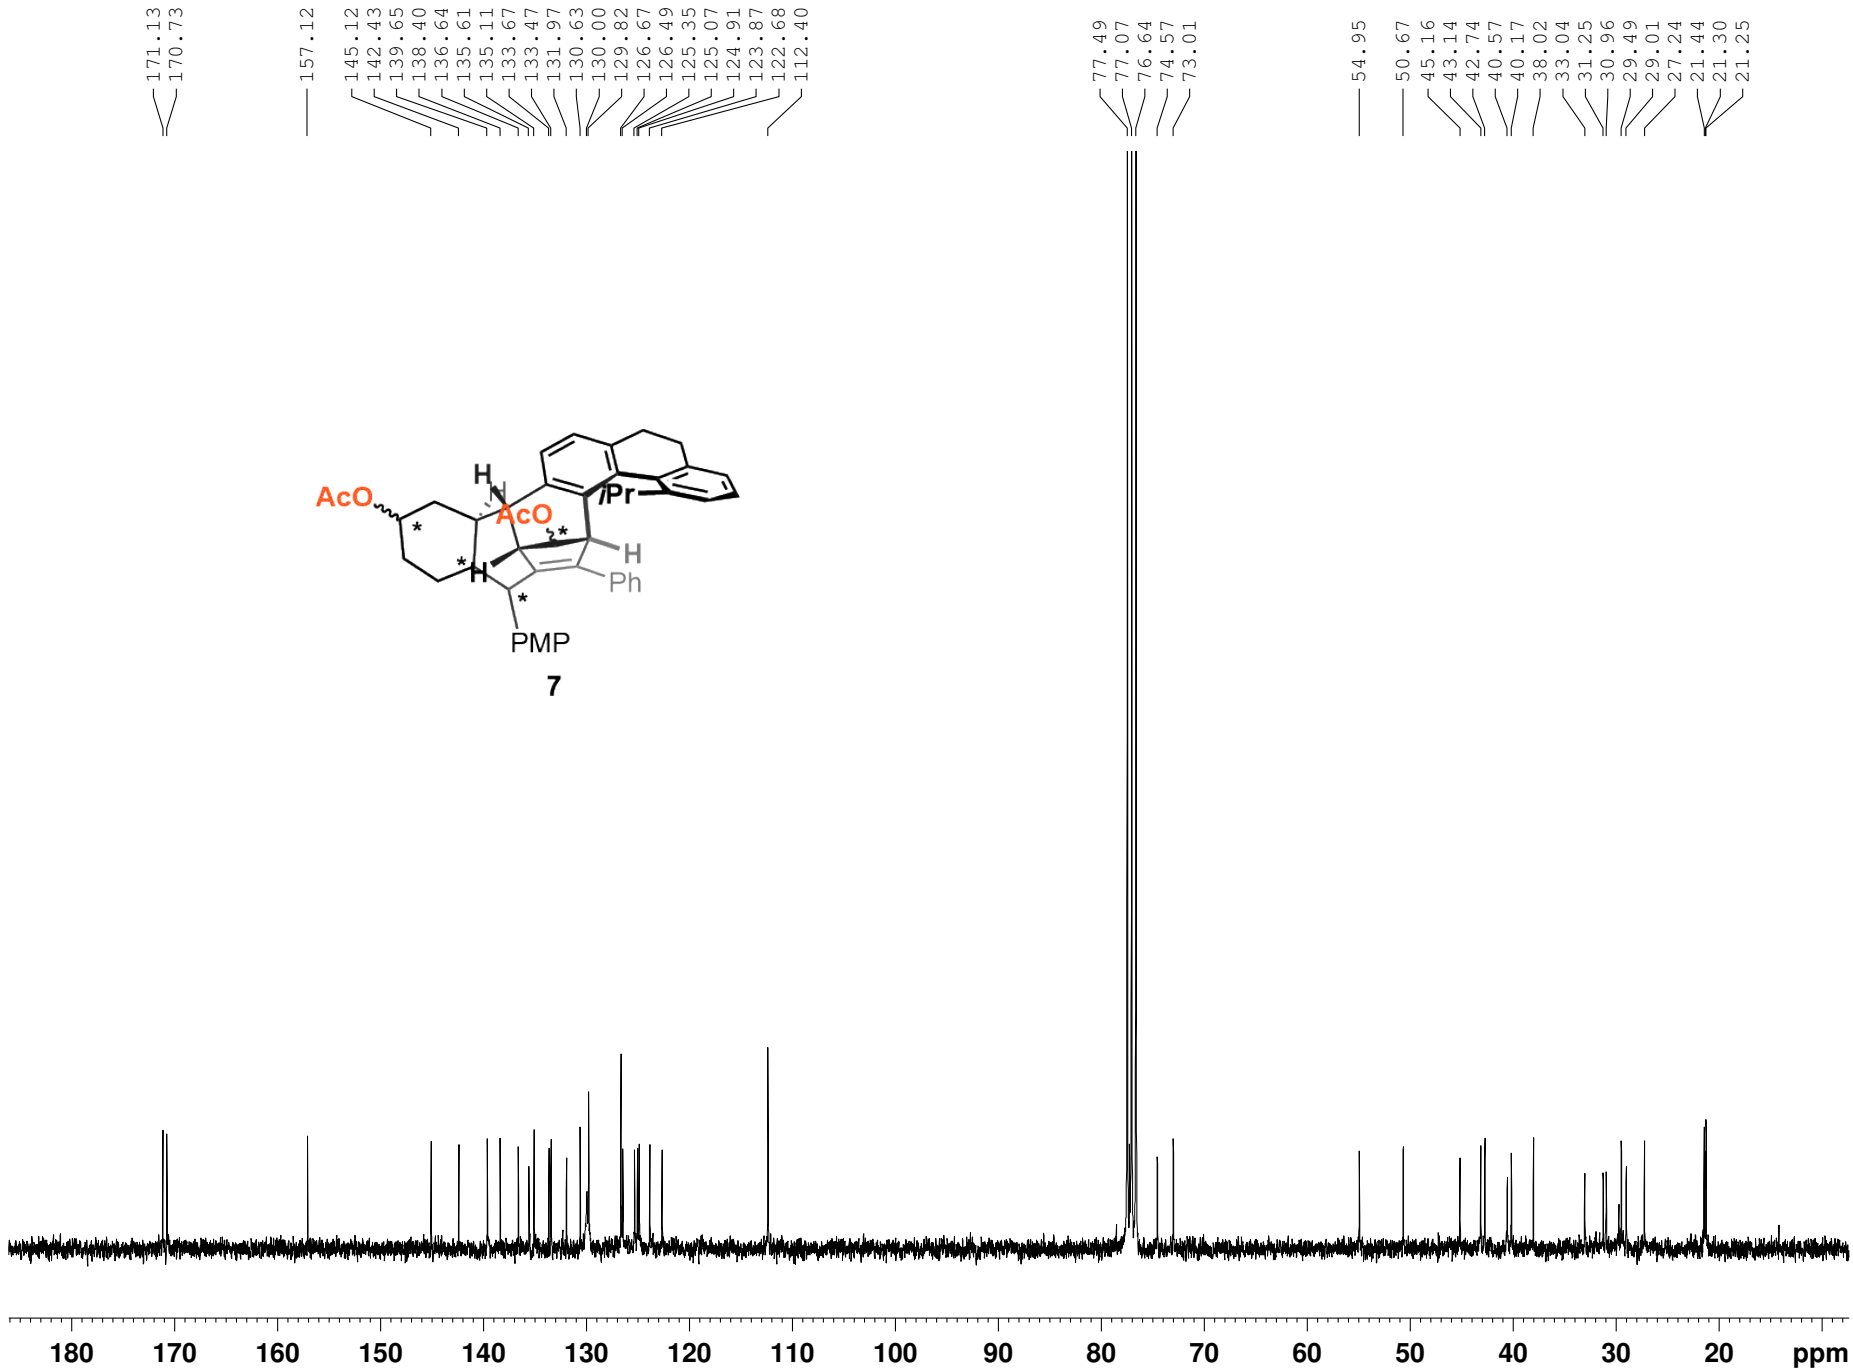

7.629  
7.602  
7.540  
7.518  
7.492  
7.467  
7.425  
7.399  
7.232  
7.186  
7.158  
7.144  
7.115  
6.987  
6.960  
6.639  
6.612  
6.542  
6.518  
6.492  
6.480  
6.446  
6.318  
6.293  
6.268  
6.039  
6.014  
5.645  
5.611

4.960

4.155  
4.134  
4.113

3.635

2.924  
2.867  
2.851  
2.627  
2.455  
2.419  
2.192  
2.147  
2.104  
1.954  
1.760  
1.739  
1.559

1.258

0.520  
0.500

-0.000

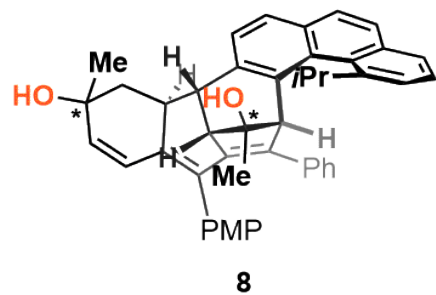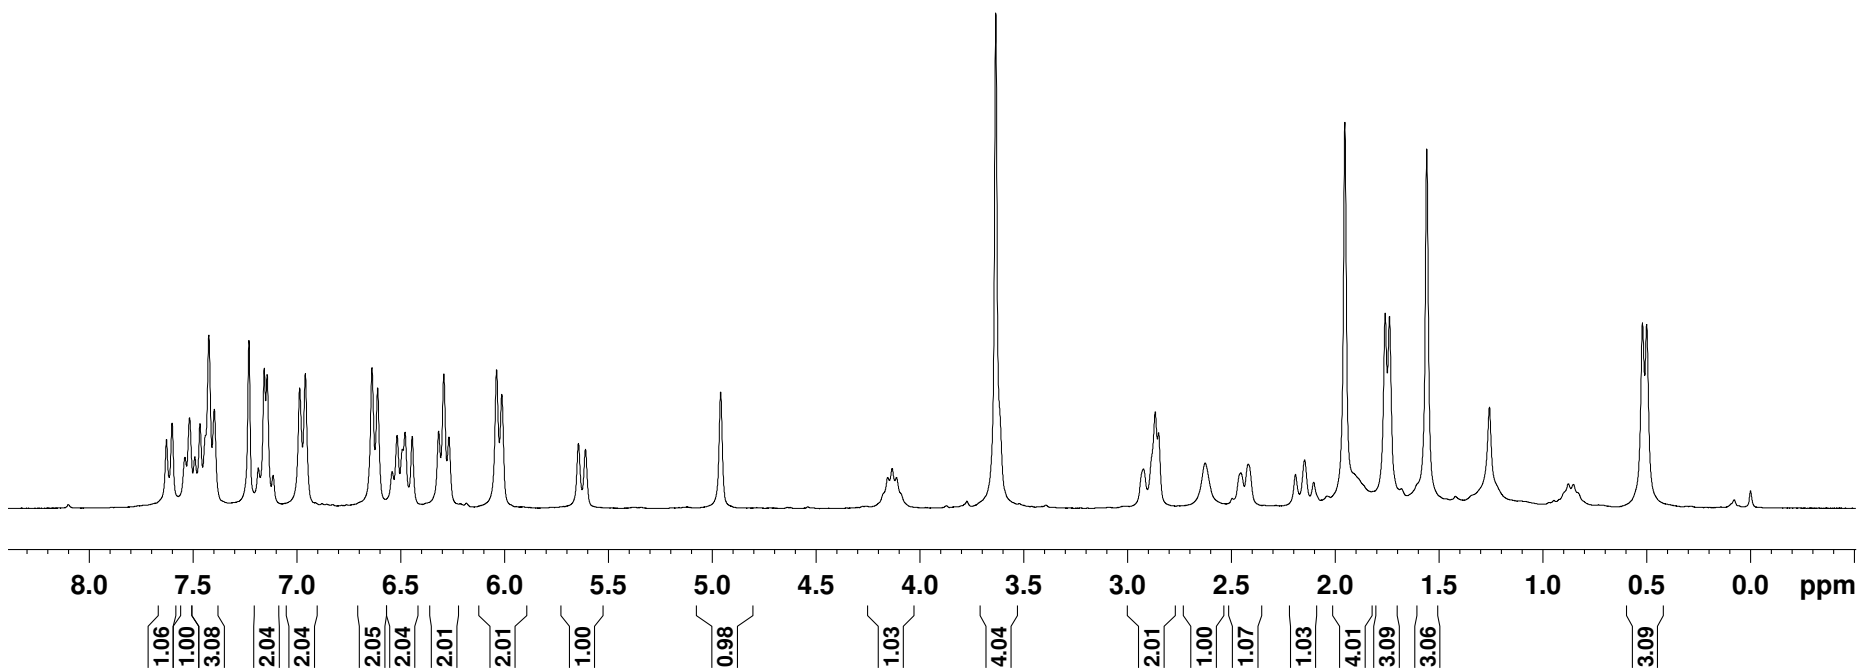

158.44  
146.88  
144.56  
138.17  
136.46  
135.81  
135.71  
135.57  
134.09  
133.88  
133.12  
131.91  
130.63  
129.85  
129.36  
127.76  
127.67  
127.12  
126.73  
126.42  
126.07  
125.64  
125.21  
125.02  
122.47  
113.38

77.51  
77.09  
76.66  
71.39

58.12  
57.12  
55.10

47.93  
44.03  
41.43

32.01  
27.77  
27.33  
25.47  
21.76

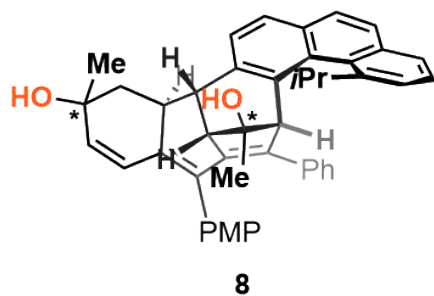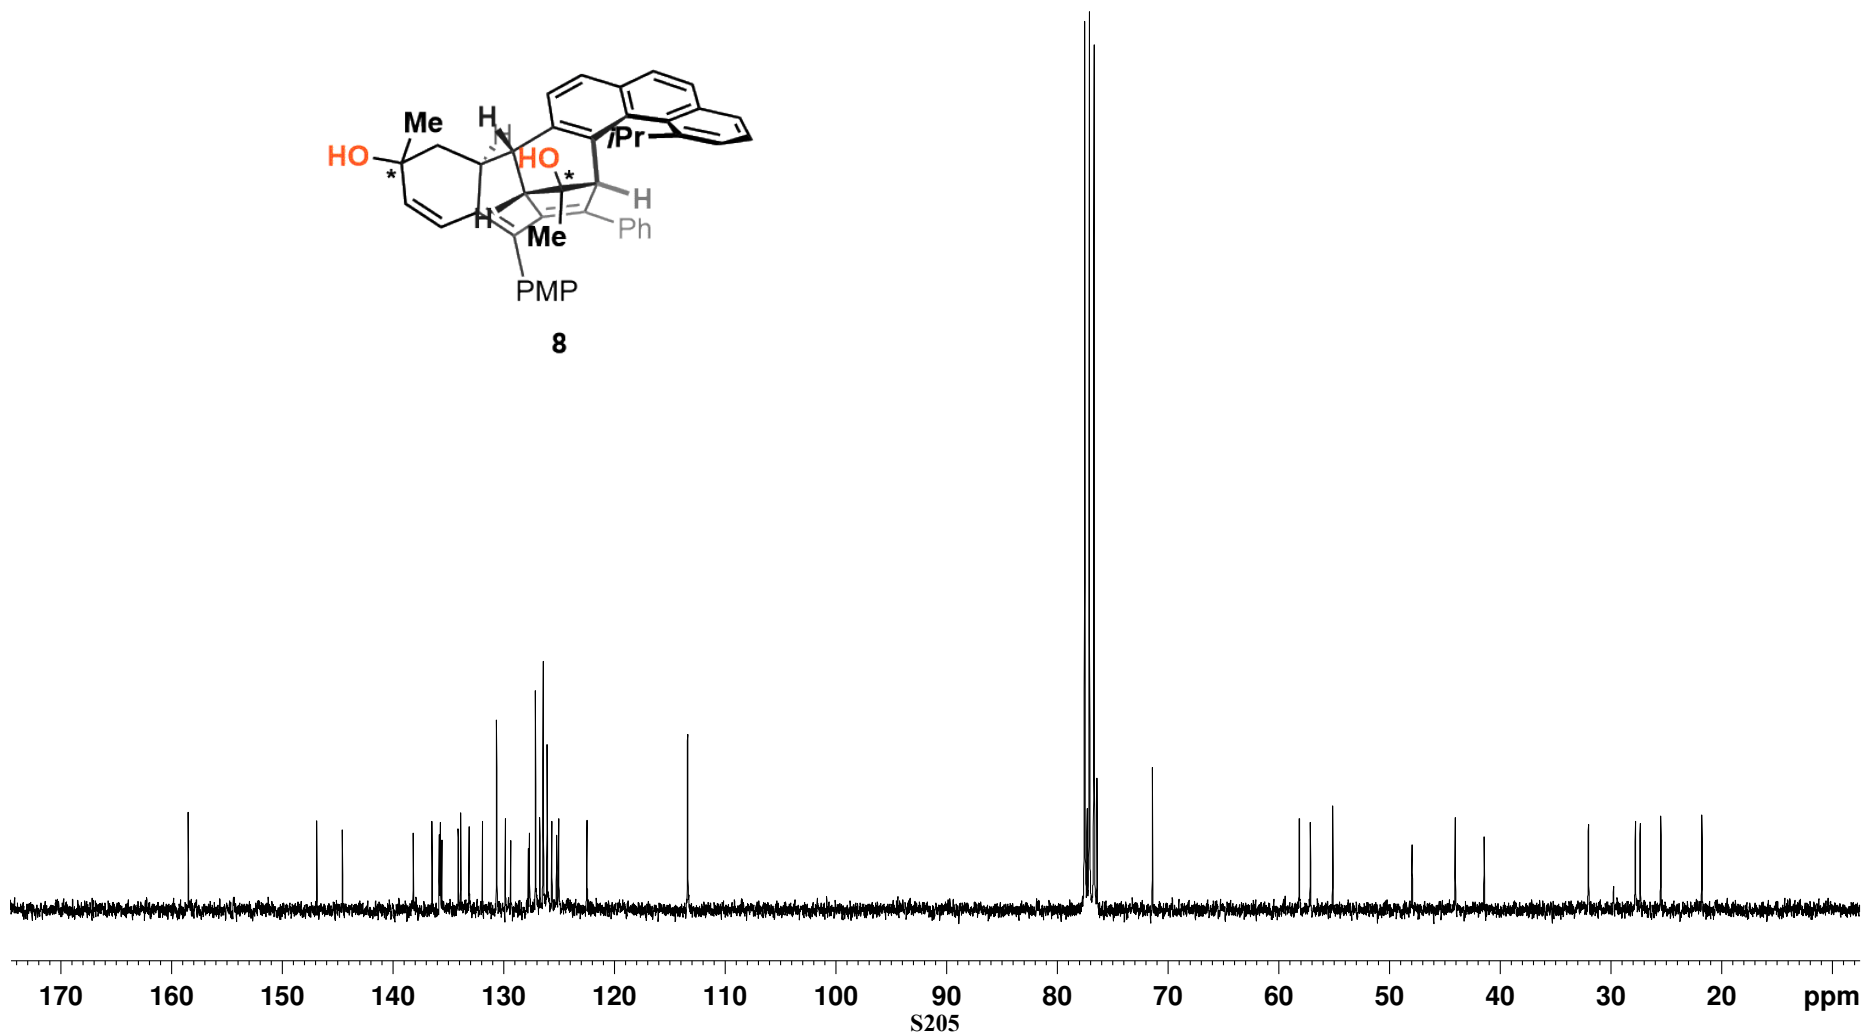

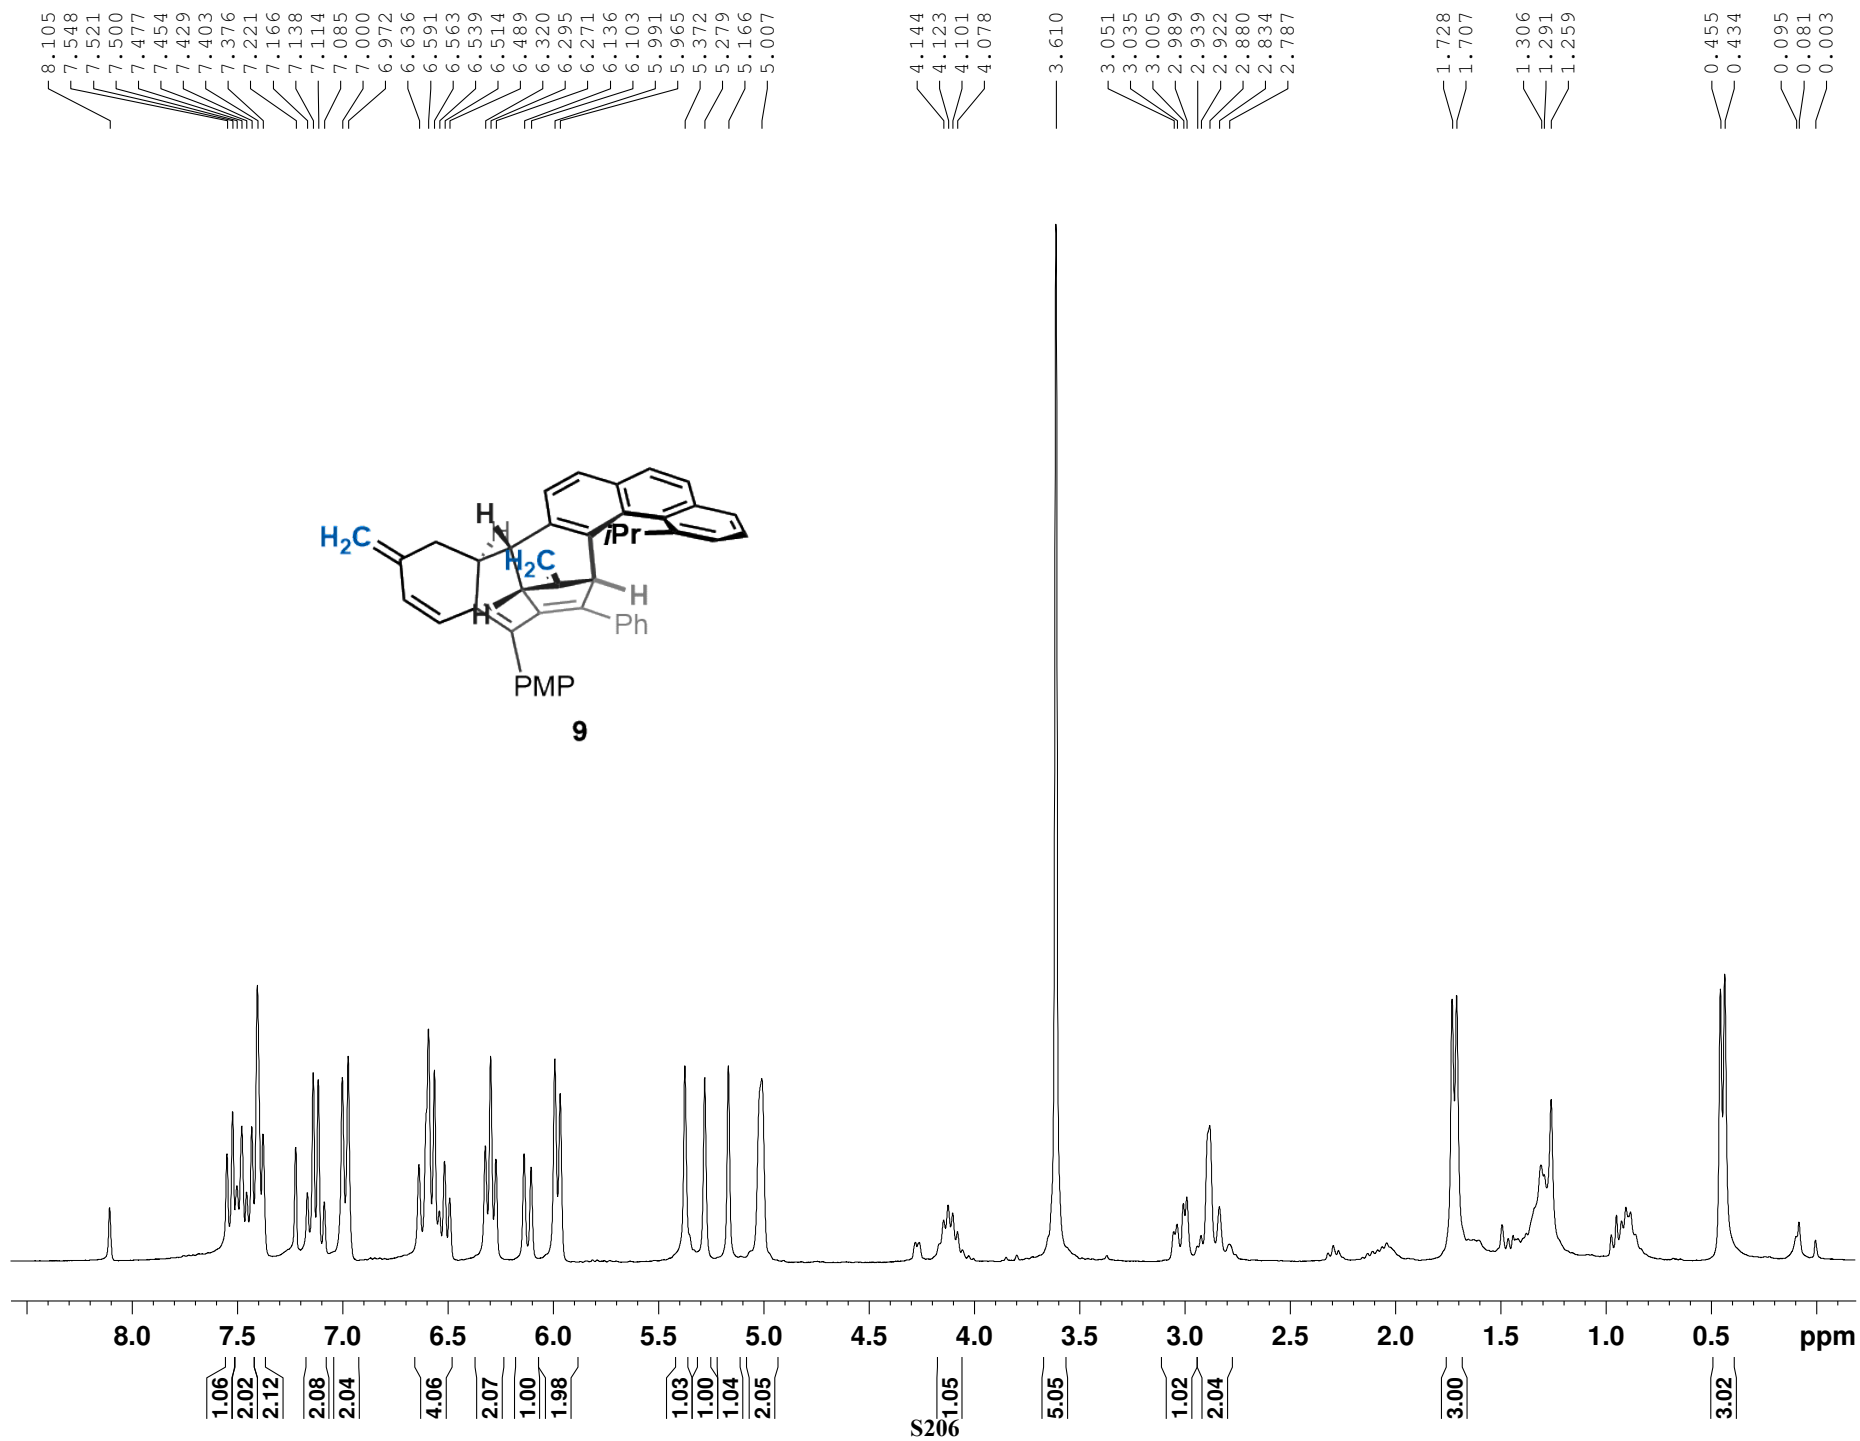

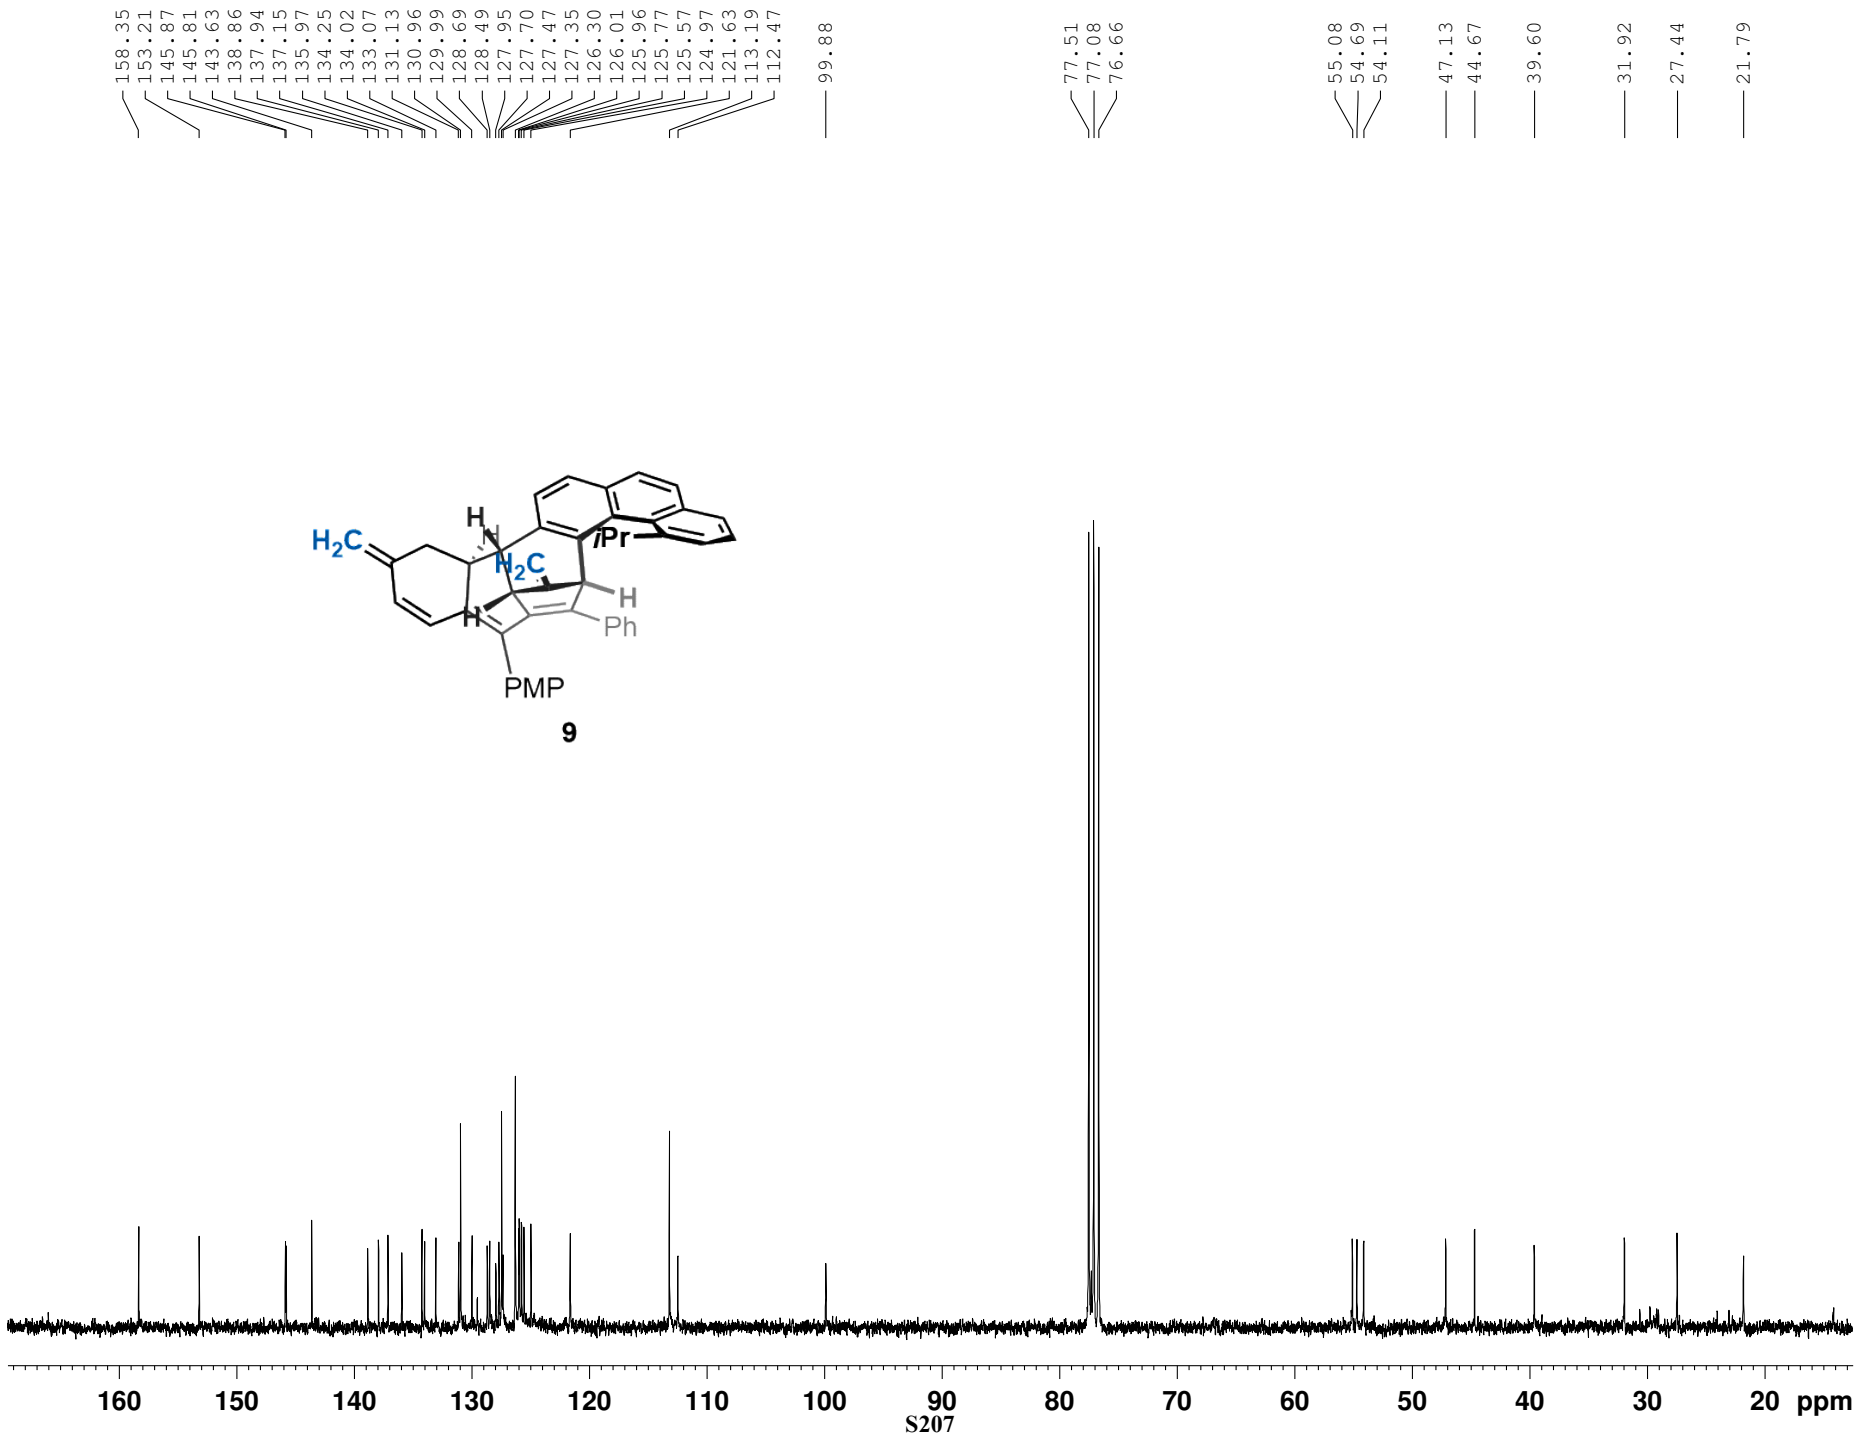



7.587  
7.560  
7.410  
7.380  
7.351  
7.334  
7.311  
7.282  
7.260  
7.060  
7.032  
7.007  
6.976  
6.932  
6.905  
6.678  
6.645  
6.600  
6.575  
6.550  
6.525  
6.498  
6.370  
6.345  
6.320  
6.043  
5.901  
5.876

3.992  
3.973  
3.885  
3.826  
3.807  
3.793  
3.743  
3.643  
3.588  
3.486  
3.465  
3.349  
3.301  
2.902  
2.852  
2.801

1.857  
1.832  
1.748  
1.725  
1.680  
1.622  
1.425  
1.294  
1.273  
1.261  
0.879  
0.856

0.156  
0.136  
0.079  
0.001

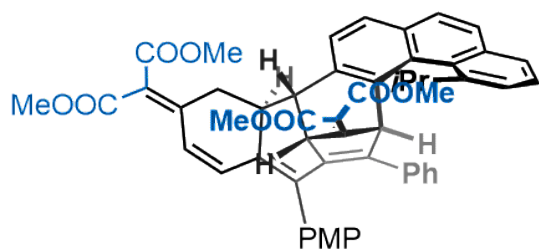

10

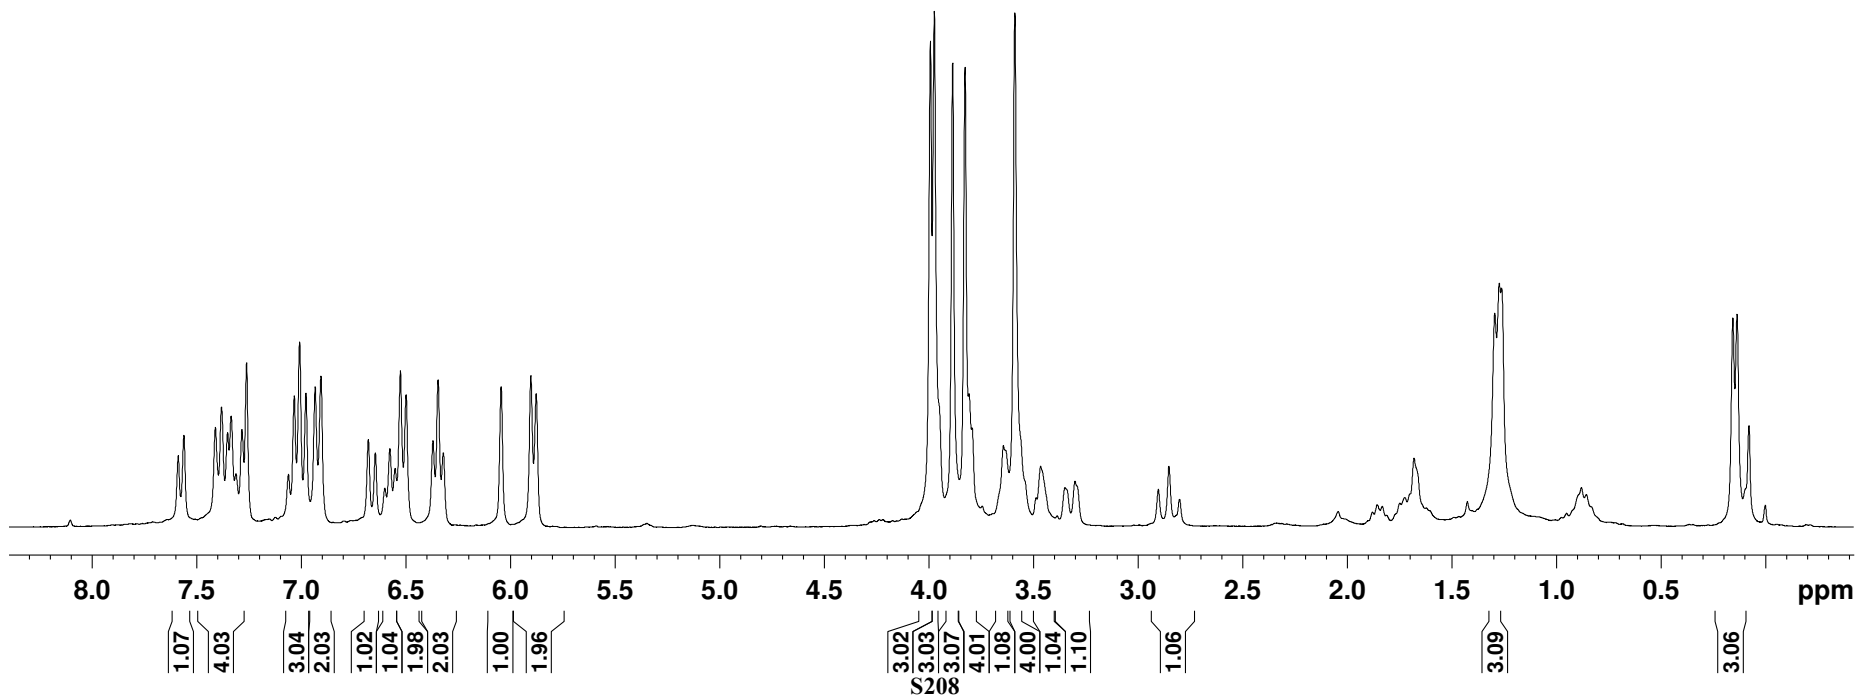

166.65  
166.26  
166.06  
166.00  
164.41  
159.05  
151.19  
149.01  
144.60  
140.10  
136.85  
136.64  
136.49  
133.89  
133.64  
133.37  
131.50  
131.14  
130.56  
129.45  
128.29  
128.13  
127.71  
127.43  
126.75  
126.54  
126.38  
126.30  
126.14  
124.40  
124.27  
123.95  
121.54  
121.01  
116.86  
113.26

77.51  
77.08  
76.66

55.07  
54.78  
53.84  
52.48  
52.36  
45.17  
43.88

35.44  
31.10  
25.19  
20.79

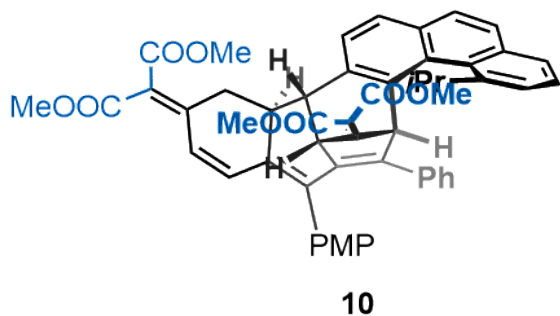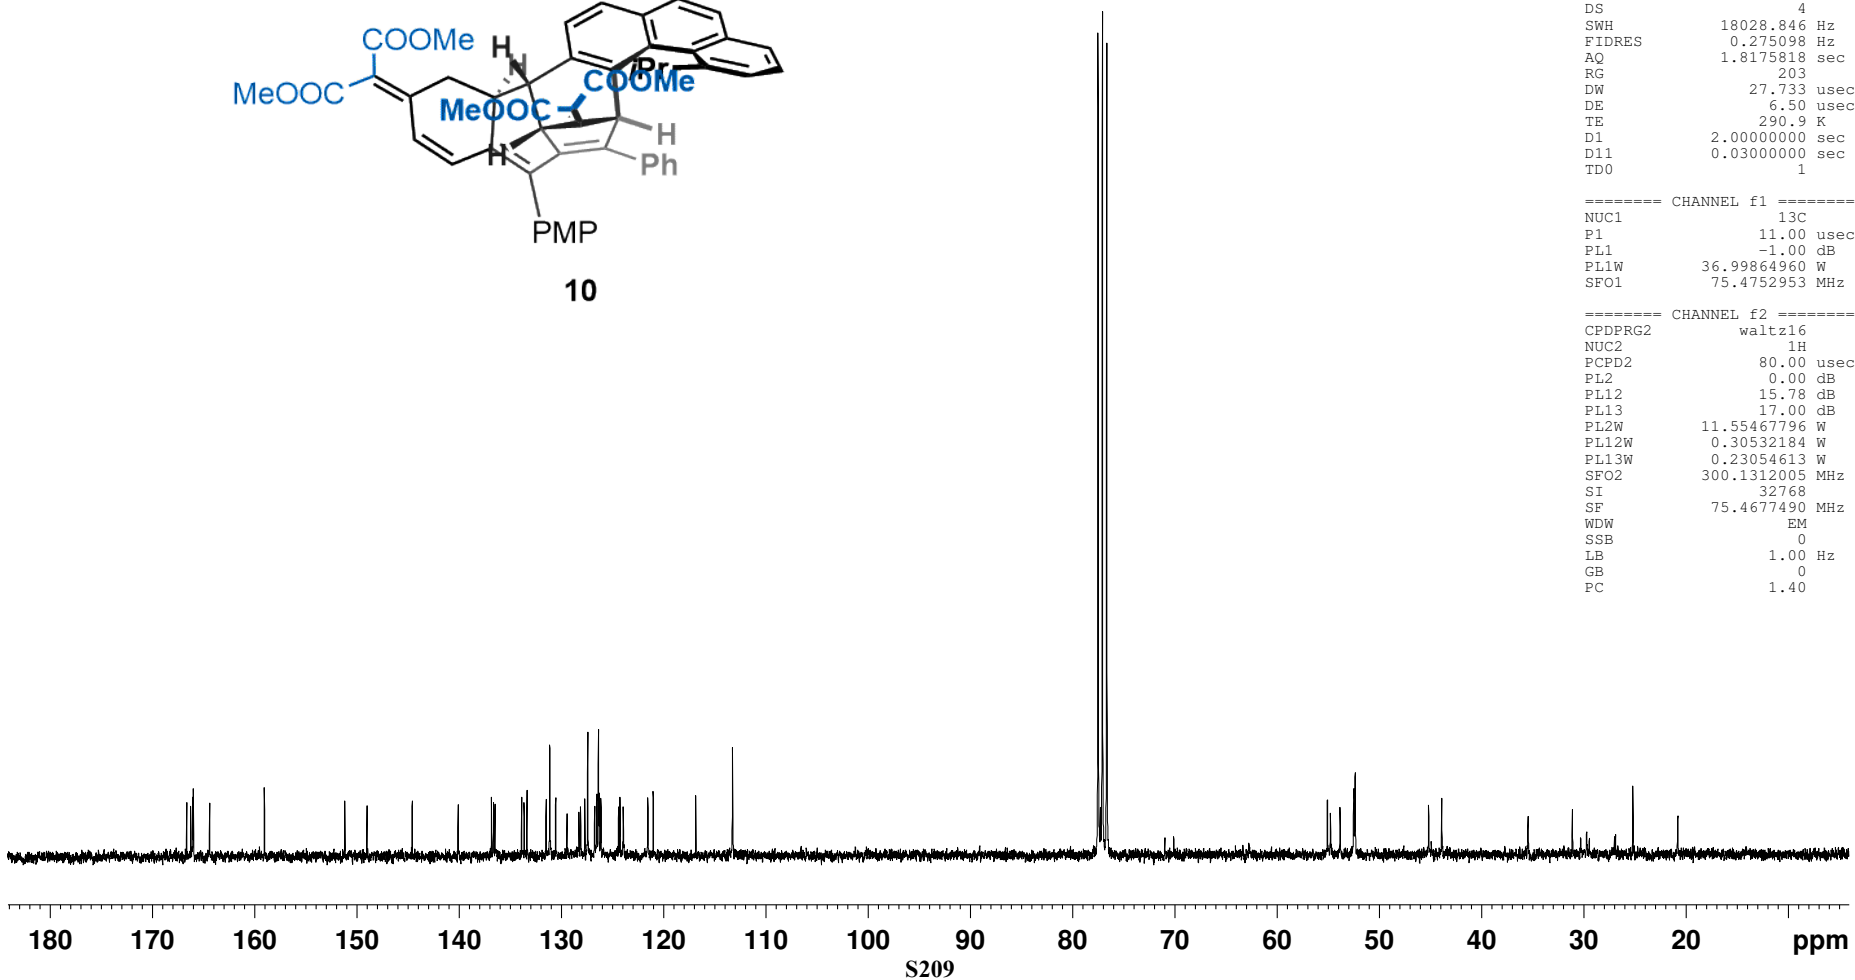

```

NAME          230313
EXPNO         6
PROCNO        1
Date_         20230313
Time          14.19
INSTRUM       spect
PROBHD        5 mm PABBO BB-
PULPROG       zgpg30
TD            65536
SOLVENT       CDCl3
NS            2335
DS            4
SWH           18028.846 Hz
FIDRES        0.275098 Hz
AQ            1.8175818 sec
RG            203
DW            27.733 usec
DE            6.50 usec
TE            290.9 K
D1            2.00000000 sec
D11           0.03000000 sec
TD0           1

===== CHANNEL f1 =====
NUC1          13C
P1            11.00 usec
PL1           -1.00 dB
PL1W          36.99864960 W
SFO1          75.4752953 MHz

===== CHANNEL f2 =====
CPDPRG2       waltz16
NUC2          1H
PCPD2         80.00 usec
PL2           0.00 dB
PL12          15.78 dB
PL13          17.00 dB
PL2W          11.55467796 W
PL12W         0.30532184 W
PL13W         0.23054613 W
SFO2          300.1312005 MHz
SI            32768
SF            75.4677490 MHz
WDW           EM
SSB           0
LB            1.00 Hz
GB            0
PC            1.40

```
